# Supplementary material for: Proteomic Characterization of Acute Kidney Injury in Patients Hospitalized with SARS-CoV2 Infection
Source: Research Square preprint supplement (doi:10.21203/rs.3.rs-2379226/v1), 2023-03-16
Supplement: Supplementary file 2 [file 952802a55139d4a10708f5ac.xlsx]

## Sheet: pheno_eGFR_data_Fig5
	Encounter_Patient_Class	flag	resultstatus	value	collectioninstant	resultinstant	isfinal_yesno	name	cr	baseline_cr	somalogic_date	max_aki_stage	aki_date	aki_last_date	aki_hospital_day	hospital_stay	chosen_somalogic_date	somalogic_hospital_day	severity	ventilation	sofa	modified_sofa	icu	min_platelet	max_bun	min_lymphocyte	max_il1beta	max_cr	aki	death	ckd	composite_outcome	max_viral_load	max_viral_load_log	viral_load_date	aki_date_minus_somalogic_date	eskd	ethnicity	smoking	age	sex	afib	htn	cad	hf	diabetes	sex_char	sex_val	eth
1	OUTPATIENT	*Unspecified	Preliminary result	0.59	4510-06-03	4510-06-03	No	CREATININE	0.59	0.25	4510-01-24	0	NA	NA	Inf	35	4510-01-24	7	1	1	2	2	TRUE	239	10	12	NA	0.27	0	0	0	0	0.0220611	1.00096	4510-01-17	Inf	FALSE	NOT Hispanic or Latino	NEVER	7	Male	FALSE	FALSE	FALSE	FALSE	FALSE	M	1	non-black
2	OUTPATIENT	*Unspecified	Preliminary result	0.63	4510-03-19	4510-03-19	No	CREATININE	0.63	0.25	4510-01-24	0	NA	NA	Inf	35	4510-01-24	7	1	1	2	2	TRUE	239	10	12	NA	0.27	0	0	0	0	0.0220611	1.00096	4510-01-17	Inf	FALSE	NOT Hispanic or Latino	NEVER	7	Male	FALSE	FALSE	FALSE	FALSE	FALSE	M	1	non-black
3	OUTPATIENT	*Unspecified	Preliminary result	0.59	4510-03-27	4510-03-27	No	CREATININE	0.59	0.25	4510-01-24	0	NA	NA	Inf	35	4510-01-24	7	1	1	2	2	TRUE	239	10	12	NA	0.27	0	0	0	0	0.0220611	1.00096	4510-01-17	Inf	FALSE	NOT Hispanic or Latino	NEVER	7	Male	FALSE	FALSE	FALSE	FALSE	FALSE	M	1	non-black
4	OUTPATIENT	*Unspecified	Preliminary result	0.52	4510-06-24	4510-06-24	No	CREATININE	0.52	0.25	4510-01-24	0	NA	NA	Inf	35	4510-01-24	7	1	1	2	2	TRUE	239	10	12	NA	0.27	0	0	0	0	0.0220611	1.00096	4510-01-17	Inf	FALSE	NOT Hispanic or Latino	NEVER	7	Male	FALSE	FALSE	FALSE	FALSE	FALSE	M	1	non-black
5	OUTPATIENT	*Unspecified	Preliminary result	0.46	4510-05-14	4510-05-14	No	CREATININE	0.46	0.25	4510-01-24	0	NA	NA	Inf	35	4510-01-24	7	1	1	2	2	TRUE	239	10	12	NA	0.27	0	0	0	0	0.0220611	1.00096	4510-01-17	Inf	FALSE	NOT Hispanic or Latino	NEVER	7	Male	FALSE	FALSE	FALSE	FALSE	FALSE	M	1	non-black
6	OUTPATIENT	*Unspecified	Preliminary result	0.68	4510-07-17	4510-07-17	No	CREATININE	0.68	0.25	4510-01-24	0	NA	NA	Inf	35	4510-01-24	7	1	1	2	2	TRUE	239	10	12	NA	0.27	0	0	0	0	0.0220611	1.00096	4510-01-17	Inf	FALSE	NOT Hispanic or Latino	NEVER	7	Male	FALSE	FALSE	FALSE	FALSE	FALSE	M	1	non-black
7	OUTPATIENT	*Unspecified	Preliminary result	0.61	4510-03-08	4510-03-08	No	CREATININE	0.61	0.25	4510-01-24	0	NA	NA	Inf	35	4510-01-24	7	1	1	2	2	TRUE	239	10	12	NA	0.27	0	0	0	0	0.0220611	1.00096	4510-01-17	Inf	FALSE	NOT Hispanic or Latino	NEVER	7	Male	FALSE	FALSE	FALSE	FALSE	FALSE	M	1	non-black
8	OUTPATIENT	*Unspecified	Preliminary result	0.61	4510-04-08	4510-04-08	No	CREATININE	0.61	0.25	4510-01-24	0	NA	NA	Inf	35	4510-01-24	7	1	1	2	2	TRUE	239	10	12	NA	0.27	0	0	0	0	0.0220611	1.00096	4510-01-17	Inf	FALSE	NOT Hispanic or Latino	NEVER	7	Male	FALSE	FALSE	FALSE	FALSE	FALSE	M	1	non-black
9	OUTPATIENT	*Unspecified	Preliminary result	0.44	4510-06-17	4510-06-17	No	CREATININE	0.44	0.25	4510-01-24	0	NA	NA	Inf	35	4510-01-24	7	1	1	2	2	TRUE	239	10	12	NA	0.27	0	0	0	0	0.0220611	1.00096	4510-01-17	Inf	FALSE	NOT Hispanic or Latino	NEVER	7	Male	FALSE	FALSE	FALSE	FALSE	FALSE	M	1	non-black
10	OUTPATIENT	*Unspecified	Preliminary result	0.58	4510-05-20	4510-05-20	No	CREATININE	0.58	0.25	4510-01-24	0	NA	NA	Inf	35	4510-01-24	7	1	1	2	2	TRUE	239	10	12	NA	0.27	0	0	0	0	0.0220611	1.00096	4510-01-17	Inf	FALSE	NOT Hispanic or Latino	NEVER	7	Male	FALSE	FALSE	FALSE	FALSE	FALSE	M	1	non-black
11	OUTPATIENT	Low	Final result	0.55	4510-02-04	4510-02-04	Yes	CREATININE	0.55	0.25	4510-01-24	0	NA	NA	Inf	35	4510-01-24	7	1	1	2	2	TRUE	239	10	12	NA	0.27	0	0	0	0	0.0220611	1.00096	4510-01-17	Inf	FALSE	NOT Hispanic or Latino	NEVER	7	Male	FALSE	FALSE	FALSE	FALSE	FALSE	M	1	non-black
12	OUTPATIENT	Abnormal	Preliminary result	0.46	4510-09-25	4510-09-25	No	CREATININE	0.46	0.25	4510-01-24	0	NA	NA	Inf	35	4510-01-24	7	1	1	2	2	TRUE	239	10	12	NA	0.27	0	0	0	0	0.0220611	1.00096	4510-01-17	Inf	FALSE	NOT Hispanic or Latino	NEVER	7	Male	FALSE	FALSE	FALSE	FALSE	FALSE	M	1	non-black
13	OUTPATIENT	*Unspecified	Preliminary result	0.61	4510-05-27	4510-05-27	No	CREATININE	0.61	0.25	4510-01-24	0	NA	NA	Inf	35	4510-01-24	7	1	1	2	2	TRUE	239	10	12	NA	0.27	0	0	0	0	0.0220611	1.00096	4510-01-17	Inf	FALSE	NOT Hispanic or Latino	NEVER	7	Male	FALSE	FALSE	FALSE	FALSE	FALSE	M	1	non-black
14	OUTPATIENT	*Unspecified	Preliminary result	0.58	4510-07-09	4510-07-09	No	CREATININE	0.58	0.25	4510-01-24	0	NA	NA	Inf	35	4510-01-24	7	1	1	2	2	TRUE	239	10	12	NA	0.27	0	0	0	0	0.0220611	1.00096	4510-01-17	Inf	FALSE	NOT Hispanic or Latino	NEVER	7	Male	FALSE	FALSE	FALSE	FALSE	FALSE	M	1	non-black
15	OUTPATIENT	*Unspecified	Preliminary result	0.76	4510-04-02	4510-04-02	No	CREATININE	0.76	0.25	4510-01-24	0	NA	NA	Inf	35	4510-01-24	7	1	1	2	2	TRUE	239	10	12	NA	0.27	0	0	0	0	0.0220611	1.00096	4510-01-17	Inf	FALSE	NOT Hispanic or Latino	NEVER	7	Male	FALSE	FALSE	FALSE	FALSE	FALSE	M	1	non-black
16	OUTPATIENT	*Unspecified	Preliminary result	0.48	4510-06-10	4510-06-13	No	CREATININE	0.48	0.25	4510-01-24	0	NA	NA	Inf	35	4510-01-24	7	1	1	2	2	TRUE	239	10	12	NA	0.27	0	0	0	0	0.0220611	1.00096	4510-01-17	Inf	FALSE	NOT Hispanic or Latino	NEVER	7	Male	FALSE	FALSE	FALSE	FALSE	FALSE	M	1	non-black
17	OUTPATIENT	*Unspecified	Preliminary result	0.62	4510-05-06	4510-05-06	No	CREATININE	0.62	0.25	4510-01-24	0	NA	NA	Inf	35	4510-01-24	7	1	1	2	2	TRUE	239	10	12	NA	0.27	0	0	0	0	0.0220611	1.00096	4510-01-17	Inf	FALSE	NOT Hispanic or Latino	NEVER	7	Male	FALSE	FALSE	FALSE	FALSE	FALSE	M	1	non-black
18	OUTPATIENT	*Unspecified	Preliminary result	0.52	4510-07-23	4510-07-23	No	CREATININE	0.52	0.25	4510-01-24	0	NA	NA	Inf	35	4510-01-24	7	1	1	2	2	TRUE	239	10	12	NA	0.27	0	0	0	0	0.0220611	1.00096	4510-01-17	Inf	FALSE	NOT Hispanic or Latino	NEVER	7	Male	FALSE	FALSE	FALSE	FALSE	FALSE	M	1	non-black
19	OUTPATIENT	Low	Final result	0.28	4510-02-10	4510-02-10	Yes	CREATININE	0.28	0.25	4510-01-24	0	NA	NA	Inf	35	4510-01-24	7	1	1	2	2	TRUE	239	10	12	NA	0.27	0	0	0	0	0.0220611	1.00096	4510-01-17	Inf	FALSE	NOT Hispanic or Latino	NEVER	7	Male	FALSE	FALSE	FALSE	FALSE	FALSE	M	1	non-black
20	OUTPATIENT	Low	Final result	0.37	4510-02-06	4510-02-06	Yes	CREATININE	0.37	0.25	4510-01-24	0	NA	NA	Inf	35	4510-01-24	7	1	1	2	2	TRUE	239	10	12	NA	0.27	0	0	0	0	0.0220611	1.00096	4510-01-17	Inf	FALSE	NOT Hispanic or Latino	NEVER	7	Male	FALSE	FALSE	FALSE	FALSE	FALSE	M	1	non-black
21	OUTPATIENT	Low	Final result	0.37	4510-02-02	4510-02-02	Yes	CREATININE	0.37	0.25	4510-01-24	0	NA	NA	Inf	35	4510-01-24	7	1	1	2	2	TRUE	239	10	12	NA	0.27	0	0	0	0	0.0220611	1.00096	4510-01-17	Inf	FALSE	NOT Hispanic or Latino	NEVER	7	Male	FALSE	FALSE	FALSE	FALSE	FALSE	M	1	non-black
22	OUTPATIENT	Low	Final result	0.32	4510-01-30	4510-01-30	Yes	CREATININE	0.32	0.25	4510-01-24	0	NA	NA	Inf	35	4510-01-24	7	1	1	2	2	TRUE	239	10	12	NA	0.27	0	0	0	0	0.0220611	1.00096	4510-01-17	Inf	FALSE	NOT Hispanic or Latino	NEVER	7	Male	FALSE	FALSE	FALSE	FALSE	FALSE	M	1	non-black
23	OUTPATIENT	Low	Final result	0.25	4510-02-09	4510-02-09	Yes	CREATININE	0.25	0.25	4510-01-24	0	NA	NA	Inf	35	4510-01-24	7	1	1	2	2	TRUE	239	10	12	NA	0.27	0	0	0	0	0.0220611	1.00096	4510-01-17	Inf	FALSE	NOT Hispanic or Latino	NEVER	7	Male	FALSE	FALSE	FALSE	FALSE	FALSE	M	1	non-black
24	OUTPATIENT	Low	Final result	0.32	4510-02-01	4510-02-01	Yes	CREATININE	0.32	0.25	4510-01-24	0	NA	NA	Inf	35	4510-01-24	7	1	1	2	2	TRUE	239	10	12	NA	0.27	0	0	0	0	0.0220611	1.00096	4510-01-17	Inf	FALSE	NOT Hispanic or Latino	NEVER	7	Male	FALSE	FALSE	FALSE	FALSE	FALSE	M	1	non-black
25	OUTPATIENT	Low	Final result	0.49	4510-02-20	4510-02-20	Yes	CREATININE	0.49	0.25	4510-01-24	0	NA	NA	Inf	35	4510-01-24	7	1	1	2	2	TRUE	239	10	12	NA	0.27	0	0	0	0	0.0220611	1.00096	4510-01-17	Inf	FALSE	NOT Hispanic or Latino	NEVER	7	Male	FALSE	FALSE	FALSE	FALSE	FALSE	M	1	non-black
26	OUTPATIENT	Low	Final result	0.46	4510-02-06	4510-02-06	Yes	CREATININE	0.46	0.25	4510-01-24	0	NA	NA	Inf	35	4510-01-24	7	1	1	2	2	TRUE	239	10	12	NA	0.27	0	0	0	0	0.0220611	1.00096	4510-01-17	Inf	FALSE	NOT Hispanic or Latino	NEVER	7	Male	FALSE	FALSE	FALSE	FALSE	FALSE	M	1	non-black
27	OUTPATIENT	Low	Final result	0.37	4510-02-11	4510-02-11	Yes	CREATININE	0.37	0.25	4510-01-24	0	NA	NA	Inf	35	4510-01-24	7	1	1	2	2	TRUE	239	10	12	NA	0.27	0	0	0	0	0.0220611	1.00096	4510-01-17	Inf	FALSE	NOT Hispanic or Latino	NEVER	7	Male	FALSE	FALSE	FALSE	FALSE	FALSE	M	1	non-black
28	OUTPATIENT	Low	Final result	0.31	4510-02-14	4510-02-14	Yes	CREATININE	0.31	0.25	4510-01-24	0	NA	NA	Inf	35	4510-01-24	7	1	1	2	2	TRUE	239	10	12	NA	0.27	0	0	0	0	0.0220611	1.00096	4510-01-17	Inf	FALSE	NOT Hispanic or Latino	NEVER	7	Male	FALSE	FALSE	FALSE	FALSE	FALSE	M	1	non-black
29	OUTPATIENT	Low	Final result	0.32	4510-02-15	4510-02-15	Yes	CREATININE	0.32	0.25	4510-01-24	0	NA	NA	Inf	35	4510-01-24	7	1	1	2	2	TRUE	239	10	12	NA	0.27	0	0	0	0	0.0220611	1.00096	4510-01-17	Inf	FALSE	NOT Hispanic or Latino	NEVER	7	Male	FALSE	FALSE	FALSE	FALSE	FALSE	M	1	non-black
30	OUTPATIENT	Low	Final result	0.28	4510-01-26	4510-01-26	Yes	CREATININE	0.28	0.25	4510-01-24	0	NA	NA	Inf	35	4510-01-24	7	1	1	2	2	TRUE	239	10	12	NA	0.27	0	0	0	0	0.0220611	1.00096	4510-01-17	Inf	FALSE	NOT Hispanic or Latino	NEVER	7	Male	FALSE	FALSE	FALSE	FALSE	FALSE	M	1	non-black
31	OUTPATIENT	Low	Final result	0.37	4510-02-16	4510-02-16	Yes	CREATININE	0.37	0.25	4510-01-24	0	NA	NA	Inf	35	4510-01-24	7	1	1	2	2	TRUE	239	10	12	NA	0.27	0	0	0	0	0.0220611	1.00096	4510-01-17	Inf	FALSE	NOT Hispanic or Latino	NEVER	7	Male	FALSE	FALSE	FALSE	FALSE	FALSE	M	1	non-black
32	OUTPATIENT	Low	Final result	0.31	4510-02-08	4510-02-08	Yes	CREATININE	0.31	0.25	4510-01-24	0	NA	NA	Inf	35	4510-01-24	7	1	1	2	2	TRUE	239	10	12	NA	0.27	0	0	0	0	0.0220611	1.00096	4510-01-17	Inf	FALSE	NOT Hispanic or Latino	NEVER	7	Male	FALSE	FALSE	FALSE	FALSE	FALSE	M	1	non-black
33	OUTPATIENT	Low	Final result	0.33	4510-02-12	4510-02-12	Yes	CREATININE	0.33	0.25	4510-01-24	0	NA	NA	Inf	35	4510-01-24	7	1	1	2	2	TRUE	239	10	12	NA	0.27	0	0	0	0	0.0220611	1.00096	4510-01-17	Inf	FALSE	NOT Hispanic or Latino	NEVER	7	Male	FALSE	FALSE	FALSE	FALSE	FALSE	M	1	non-black
34	OUTPATIENT	Low	Final result	0.46	4510-02-18	4510-02-18	Yes	CREATININE	0.46	0.25	4510-01-24	0	NA	NA	Inf	35	4510-01-24	7	1	1	2	2	TRUE	239	10	12	NA	0.27	0	0	0	0	0.0220611	1.00096	4510-01-17	Inf	FALSE	NOT Hispanic or Latino	NEVER	7	Male	FALSE	FALSE	FALSE	FALSE	FALSE	M	1	non-black
35	OUTPATIENT	Low	Final result	0.37	4510-01-31	4510-01-31	Yes	CREATININE	0.37	0.25	4510-01-24	0	NA	NA	Inf	35	4510-01-24	7	1	1	2	2	TRUE	239	10	12	NA	0.27	0	0	0	0	0.0220611	1.00096	4510-01-17	Inf	FALSE	NOT Hispanic or Latino	NEVER	7	Male	FALSE	FALSE	FALSE	FALSE	FALSE	M	1	non-black
36	OUTPATIENT	Low	Final result	0.4	4510-02-19	4510-02-19	Yes	CREATININE	0.4	0.25	4510-01-24	0	NA	NA	Inf	35	4510-01-24	7	1	1	2	2	TRUE	239	10	12	NA	0.27	0	0	0	0	0.0220611	1.00096	4510-01-17	Inf	FALSE	NOT Hispanic or Latino	NEVER	7	Male	FALSE	FALSE	FALSE	FALSE	FALSE	M	1	non-black
37	OUTPATIENT	Low	Final result	0.36	4510-01-29	4510-01-29	Yes	CREATININE	0.36	0.25	4510-01-24	0	NA	NA	Inf	35	4510-01-24	7	1	1	2	2	TRUE	239	10	12	NA	0.27	0	0	0	0	0.0220611	1.00096	4510-01-17	Inf	FALSE	NOT Hispanic or Latino	NEVER	7	Male	FALSE	FALSE	FALSE	FALSE	FALSE	M	1	non-black
38	OUTPATIENT	Low	Final result	0.33	4510-02-07	4510-02-07	Yes	CREATININE	0.33	0.25	4510-01-24	0	NA	NA	Inf	35	4510-01-24	7	1	1	2	2	TRUE	239	10	12	NA	0.27	0	0	0	0	0.0220611	1.00096	4510-01-17	Inf	FALSE	NOT Hispanic or Latino	NEVER	7	Male	FALSE	FALSE	FALSE	FALSE	FALSE	M	1	non-black
39	OUTPATIENT	Low	Final result	0.37	4510-01-28	4510-01-28	Yes	CREATININE	0.37	0.25	4510-01-24	0	NA	NA	Inf	35	4510-01-24	7	1	1	2	2	TRUE	239	10	12	NA	0.27	0	0	0	0	0.0220611	1.00096	4510-01-17	Inf	FALSE	NOT Hispanic or Latino	NEVER	7	Male	FALSE	FALSE	FALSE	FALSE	FALSE	M	1	non-black
40	OUTPATIENT	Low	Final result	0.33	4510-02-17	4510-02-17	Yes	CREATININE	0.33	0.25	4510-01-24	0	NA	NA	Inf	35	4510-01-24	7	1	1	2	2	TRUE	239	10	12	NA	0.27	0	0	0	0	0.0220611	1.00096	4510-01-17	Inf	FALSE	NOT Hispanic or Latino	NEVER	7	Male	FALSE	FALSE	FALSE	FALSE	FALSE	M	1	non-black
41	OUTPATIENT	Low	Final result	0.32	4510-02-14	4510-02-15	Yes	CREATININE	0.32	0.25	4510-01-24	0	NA	NA	Inf	35	4510-01-24	7	1	1	2	2	TRUE	239	10	12	NA	0.27	0	0	0	0	0.0220611	1.00096	4510-01-17	Inf	FALSE	NOT Hispanic or Latino	NEVER	7	Male	FALSE	FALSE	FALSE	FALSE	FALSE	M	1	non-black
42	OUTPATIENT	Low	Final result	0.32	4510-02-10	4510-02-10	Yes	CREATININE	0.32	0.25	4510-01-24	0	NA	NA	Inf	35	4510-01-24	7	1	1	2	2	TRUE	239	10	12	NA	0.27	0	0	0	0	0.0220611	1.00096	4510-01-17	Inf	FALSE	NOT Hispanic or Latino	NEVER	7	Male	FALSE	FALSE	FALSE	FALSE	FALSE	M	1	non-black
43	OUTPATIENT	Low	Final result	0.26	4510-01-25	4510-01-25	Yes	CREATININE	0.26	0.25	4510-01-24	0	NA	NA	Inf	35	4510-01-24	7	1	1	2	2	TRUE	239	10	12	NA	0.27	0	0	0	0	0.0220611	1.00096	4510-01-17	Inf	FALSE	NOT Hispanic or Latino	NEVER	7	Male	FALSE	FALSE	FALSE	FALSE	FALSE	M	1	non-black
44	OUTPATIENT	Low	Final result	0.33	4510-02-13	4510-02-13	Yes	CREATININE	0.33	0.25	4510-01-24	0	NA	NA	Inf	35	4510-01-24	7	1	1	2	2	TRUE	239	10	12	NA	0.27	0	0	0	0	0.0220611	1.00096	4510-01-17	Inf	FALSE	NOT Hispanic or Latino	NEVER	7	Male	FALSE	FALSE	FALSE	FALSE	FALSE	M	1	non-black
45	OUTPATIENT	Low	Final result	0.27	4510-01-24	4510-01-24	Yes	CREATININE	0.27	0.25	4510-01-24	0	NA	NA	Inf	35	4510-01-24	7	1	1	2	2	TRUE	239	10	12	NA	0.27	0	0	0	0	0.0220611	1.00096	4510-01-17	Inf	FALSE	NOT Hispanic or Latino	NEVER	7	Male	FALSE	FALSE	FALSE	FALSE	FALSE	M	1	non-black
46	OUTPATIENT	Low	Final result	0.36	4510-02-08	4510-02-08	Yes	CREATININE	0.36	0.25	4510-01-24	0	NA	NA	Inf	35	4510-01-24	7	1	1	2	2	TRUE	239	10	12	NA	0.27	0	0	0	0	0.0220611	1.00096	4510-01-17	Inf	FALSE	NOT Hispanic or Latino	NEVER	7	Male	FALSE	FALSE	FALSE	FALSE	FALSE	M	1	non-black
47	OUTPATIENT	Low	Final result	0.44	4510-02-04	4510-02-04	Yes	CREATININE	0.44	0.25	4510-01-24	0	NA	NA	Inf	35	4510-01-24	7	1	1	2	2	TRUE	239	10	12	NA	0.27	0	0	0	0	0.0220611	1.00096	4510-01-17	Inf	FALSE	NOT Hispanic or Latino	NEVER	7	Male	FALSE	FALSE	FALSE	FALSE	FALSE	M	1	non-black
48	OUTPATIENT	Low	Final result	0.47	4510-02-05	4510-02-05	Yes	CREATININE	0.47	0.25	4510-01-24	0	NA	NA	Inf	35	4510-01-24	7	1	1	2	2	TRUE	239	10	12	NA	0.27	0	0	0	0	0.0220611	1.00096	4510-01-17	Inf	FALSE	NOT Hispanic or Latino	NEVER	7	Male	FALSE	FALSE	FALSE	FALSE	FALSE	M	1	non-black
49	OUTPATIENT	Low	Final result	0.55	4510-02-04	4510-02-04	Yes	CREATININE	0.55	0.25	4510-01-24	0	NA	NA	Inf	35	4510-01-24	7	1	1	2	2	TRUE	239	10	12	NA	0.27	0	0	0	0	0.0220611	1.00096	4510-01-17	Inf	FALSE	NOT Hispanic or Latino	NEVER	7	Male	FALSE	FALSE	FALSE	FALSE	FALSE	M	1	non-black
50	OUTPATIENT	Low	Final result	0.31	4510-01-27	4510-01-27	Yes	CREATININE	0.31	0.25	4510-01-24	0	NA	NA	Inf	35	4510-01-24	7	1	1	2	2	TRUE	239	10	12	NA	0.27	0	0	0	0	0.0220611	1.00096	4510-01-17	Inf	FALSE	NOT Hispanic or Latino	NEVER	7	Male	FALSE	FALSE	FALSE	FALSE	FALSE	M	1	non-black
51	OUTPATIENT	Low	Final result	0.48	4510-07-01	4510-07-01	Yes	CREATININE	0.48	0.25	4510-01-24	0	NA	NA	Inf	35	4510-01-24	7	1	1	2	2	TRUE	239	10	12	NA	0.27	0	0	0	0	0.0220611	1.00096	4510-01-17	Inf	FALSE	NOT Hispanic or Latino	NEVER	7	Male	FALSE	FALSE	FALSE	FALSE	FALSE	M	1	non-black
52	OUTPATIENT	Abnormal	Preliminary result	0.4	4511-06-09	4511-06-09	No	CREATININE	0.4	0.25	4510-01-24	0	NA	NA	Inf	35	4510-01-24	7	1	1	2	2	TRUE	239	10	12	NA	0.27	0	0	0	0	0.0220611	1.00096	4510-01-17	Inf	FALSE	NOT Hispanic or Latino	NEVER	7	Male	FALSE	FALSE	FALSE	FALSE	FALSE	M	1	non-black
53	OUTPATIENT	*Unspecified	Preliminary result	0.49	4510-04-22	4510-04-22	No	CREATININE	0.49	0.25	4510-01-24	0	NA	NA	Inf	35	4510-01-24	7	1	1	2	2	TRUE	239	10	12	NA	0.27	0	0	0	0	0.0220611	1.00096	4510-01-17	Inf	FALSE	NOT Hispanic or Latino	NEVER	7	Male	FALSE	FALSE	FALSE	FALSE	FALSE	M	1	non-black
54	OUTPATIENT	Abnormal	Preliminary result	0.52	4511-04-22	4511-04-28	No	CREATININE	0.52	0.25	4510-01-24	0	NA	NA	Inf	35	4510-01-24	7	1	1	2	2	TRUE	239	10	12	NA	0.27	0	0	0	0	0.0220611	1.00096	4510-01-17	Inf	FALSE	NOT Hispanic or Latino	NEVER	7	Male	FALSE	FALSE	FALSE	FALSE	FALSE	M	1	non-black
55	OUTPATIENT	Abnormal	Preliminary result	0.54	4511-05-12	4511-05-16	No	CREATININE	0.54	0.25	4510-01-24	0	NA	NA	Inf	35	4510-01-24	7	1	1	2	2	TRUE	239	10	12	NA	0.27	0	0	0	0	0.0220611	1.00096	4510-01-17	Inf	FALSE	NOT Hispanic or Latino	NEVER	7	Male	FALSE	FALSE	FALSE	FALSE	FALSE	M	1	non-black
56	OUTPATIENT	Abnormal	Preliminary result	0.43	4511-05-05	4511-05-05	No	CREATININE	0.43	0.25	4510-01-24	0	NA	NA	Inf	35	4510-01-24	7	1	1	2	2	TRUE	239	10	12	NA	0.27	0	0	0	0	0.0220611	1.00096	4510-01-17	Inf	FALSE	NOT Hispanic or Latino	NEVER	7	Male	FALSE	FALSE	FALSE	FALSE	FALSE	M	1	non-black
57	OUTPATIENT	Abnormal	Preliminary result	0.48	4511-04-01	4511-04-01	No	CREATININE	0.48	0.25	4510-01-24	0	NA	NA	Inf	35	4510-01-24	7	1	1	2	2	TRUE	239	10	12	NA	0.27	0	0	0	0	0.0220611	1.00096	4510-01-17	Inf	FALSE	NOT Hispanic or Latino	NEVER	7	Male	FALSE	FALSE	FALSE	FALSE	FALSE	M	1	non-black
58	OUTPATIENT	Low	Final result	0.31	4510-12-01	4510-12-01	Yes	CREATININE	0.31	0.25	4510-01-24	0	NA	NA	Inf	35	4510-01-24	7	1	1	2	2	TRUE	239	10	12	NA	0.27	0	0	0	0	0.0220611	1.00096	4510-01-17	Inf	FALSE	NOT Hispanic or Latino	NEVER	7	Male	FALSE	FALSE	FALSE	FALSE	FALSE	M	1	non-black
59	OUTPATIENT	*Unspecified	Final result	0.74	4511-01-10	4511-01-10	Yes	CREATININE	0.74	0.25	4510-01-24	0	NA	NA	Inf	35	4510-01-24	7	1	1	2	2	TRUE	239	10	12	NA	0.27	0	0	0	0	0.0220611	1.00096	4510-01-17	Inf	FALSE	NOT Hispanic or Latino	NEVER	7	Male	FALSE	FALSE	FALSE	FALSE	FALSE	M	1	non-black
60	OUTPATIENT	Abnormal	Preliminary result	0.52	4510-10-28	4510-10-28	No	CREATININE	0.52	0.25	4510-01-24	0	NA	NA	Inf	35	4510-01-24	7	1	1	2	2	TRUE	239	10	12	NA	0.27	0	0	0	0	0.0220611	1.00096	4510-01-17	Inf	FALSE	NOT Hispanic or Latino	NEVER	7	Male	FALSE	FALSE	FALSE	FALSE	FALSE	M	1	non-black
61	OUTPATIENT	Low	Final result	0.44	4510-10-13	4510-10-13	Yes	CREATININE	0.44	0.25	4510-01-24	0	NA	NA	Inf	35	4510-01-24	7	1	1	2	2	TRUE	239	10	12	NA	0.27	0	0	0	0	0.0220611	1.00096	4510-01-17	Inf	FALSE	NOT Hispanic or Latino	NEVER	7	Male	FALSE	FALSE	FALSE	FALSE	FALSE	M	1	non-black
62	OUTPATIENT	*Unspecified	Final result	0.8	4511-01-10	4511-01-10	Yes	CREATININE	0.8	0.25	4510-01-24	0	NA	NA	Inf	35	4510-01-24	7	1	1	2	2	TRUE	239	10	12	NA	0.27	0	0	0	0	0.0220611	1.00096	4510-01-17	Inf	FALSE	NOT Hispanic or Latino	NEVER	7	Male	FALSE	FALSE	FALSE	FALSE	FALSE	M	1	non-black
63	OUTPATIENT	Low	Final result	0.29	4511-02-10	4511-02-10	Yes	CREATININE	0.29	0.25	4510-01-24	0	NA	NA	Inf	35	4510-01-24	7	1	1	2	2	TRUE	239	10	12	NA	0.27	0	0	0	0	0.0220611	1.00096	4510-01-17	Inf	FALSE	NOT Hispanic or Latino	NEVER	7	Male	FALSE	FALSE	FALSE	FALSE	FALSE	M	1	non-black
64	OUTPATIENT	Low	Final result	0.33	4511-02-11	4511-02-11	Yes	CREATININE	0.33	0.25	4510-01-24	0	NA	NA	Inf	35	4510-01-24	7	1	1	2	2	TRUE	239	10	12	NA	0.27	0	0	0	0	0.0220611	1.00096	4510-01-17	Inf	FALSE	NOT Hispanic or Latino	NEVER	7	Male	FALSE	FALSE	FALSE	FALSE	FALSE	M	1	non-black
65	OUTPATIENT	Low	Final result	0.26	4511-01-27	4511-01-27	Yes	CREATININE	0.26	0.25	4510-01-24	0	NA	NA	Inf	35	4510-01-24	7	1	1	2	2	TRUE	239	10	12	NA	0.27	0	0	0	0	0.0220611	1.00096	4510-01-17	Inf	FALSE	NOT Hispanic or Latino	NEVER	7	Male	FALSE	FALSE	FALSE	FALSE	FALSE	M	1	non-black
66	OUTPATIENT	Low	Final result	0.2	4511-01-23	4511-01-23	Yes	CREATININE	0.2	0.25	4510-01-24	0	NA	NA	Inf	35	4510-01-24	7	1	1	2	2	TRUE	239	10	12	NA	0.27	0	0	0	0	0.0220611	1.00096	4510-01-17	Inf	FALSE	NOT Hispanic or Latino	NEVER	7	Male	FALSE	FALSE	FALSE	FALSE	FALSE	M	1	non-black
67	OUTPATIENT	Low	Final result	0.23	4511-01-24	4511-01-24	Yes	CREATININE	0.23	0.25	4510-01-24	0	NA	NA	Inf	35	4510-01-24	7	1	1	2	2	TRUE	239	10	12	NA	0.27	0	0	0	0	0.0220611	1.00096	4510-01-17	Inf	FALSE	NOT Hispanic or Latino	NEVER	7	Male	FALSE	FALSE	FALSE	FALSE	FALSE	M	1	non-black
68	OUTPATIENT	Low	Final result	0.27	4510-12-20	4510-12-20	Yes	CREATININE	0.27	0.25	4510-01-24	0	NA	NA	Inf	35	4510-01-24	7	1	1	2	2	TRUE	239	10	12	NA	0.27	0	0	0	0	0.0220611	1.00096	4510-01-17	Inf	FALSE	NOT Hispanic or Latino	NEVER	7	Male	FALSE	FALSE	FALSE	FALSE	FALSE	M	1	non-black
69	OUTPATIENT	Low	Final result	0.33	4510-12-30	4510-12-30	Yes	CREATININE	0.33	0.25	4510-01-24	0	NA	NA	Inf	35	4510-01-24	7	1	1	2	2	TRUE	239	10	12	NA	0.27	0	0	0	0	0.0220611	1.00096	4510-01-17	Inf	FALSE	NOT Hispanic or Latino	NEVER	7	Male	FALSE	FALSE	FALSE	FALSE	FALSE	M	1	non-black
70	OUTPATIENT	Low	Final result	0.3	4511-02-07	4511-02-07	Yes	CREATININE	0.3	0.25	4510-01-24	0	NA	NA	Inf	35	4510-01-24	7	1	1	2	2	TRUE	239	10	12	NA	0.27	0	0	0	0	0.0220611	1.00096	4510-01-17	Inf	FALSE	NOT Hispanic or Latino	NEVER	7	Male	FALSE	FALSE	FALSE	FALSE	FALSE	M	1	non-black
71	OUTPATIENT	Low	Final result	0.38	4511-02-08	4511-02-08	Yes	CREATININE	0.38	0.25	4510-01-24	0	NA	NA	Inf	35	4510-01-24	7	1	1	2	2	TRUE	239	10	12	NA	0.27	0	0	0	0	0.0220611	1.00096	4510-01-17	Inf	FALSE	NOT Hispanic or Latino	NEVER	7	Male	FALSE	FALSE	FALSE	FALSE	FALSE	M	1	non-black
72	OUTPATIENT	Low	Final result	0.37	4511-02-16	4511-02-16	Yes	CREATININE	0.37	0.25	4510-01-24	0	NA	NA	Inf	35	4510-01-24	7	1	1	2	2	TRUE	239	10	12	NA	0.27	0	0	0	0	0.0220611	1.00096	4510-01-17	Inf	FALSE	NOT Hispanic or Latino	NEVER	7	Male	FALSE	FALSE	FALSE	FALSE	FALSE	M	1	non-black
73	OUTPATIENT	Low	Final result	0.3	4511-02-12	4511-02-12	Yes	CREATININE	0.3	0.25	4510-01-24	0	NA	NA	Inf	35	4510-01-24	7	1	1	2	2	TRUE	239	10	12	NA	0.27	0	0	0	0	0.0220611	1.00096	4510-01-17	Inf	FALSE	NOT Hispanic or Latino	NEVER	7	Male	FALSE	FALSE	FALSE	FALSE	FALSE	M	1	non-black
74	OUTPATIENT	Low	Final result	0.39	4511-02-16	4511-02-16	Yes	CREATININE	0.39	0.25	4510-01-24	0	NA	NA	Inf	35	4510-01-24	7	1	1	2	2	TRUE	239	10	12	NA	0.27	0	0	0	0	0.0220611	1.00096	4510-01-17	Inf	FALSE	NOT Hispanic or Latino	NEVER	7	Male	FALSE	FALSE	FALSE	FALSE	FALSE	M	1	non-black
75	OUTPATIENT	Low	Final result	0.31	4511-02-13	4511-02-13	Yes	CREATININE	0.31	0.25	4510-01-24	0	NA	NA	Inf	35	4510-01-24	7	1	1	2	2	TRUE	239	10	12	NA	0.27	0	0	0	0	0.0220611	1.00096	4510-01-17	Inf	FALSE	NOT Hispanic or Latino	NEVER	7	Male	FALSE	FALSE	FALSE	FALSE	FALSE	M	1	non-black
76	OUTPATIENT	Low	Final result	0.55	4511-02-18	4511-02-18	Yes	CREATININE	0.55	0.25	4510-01-24	0	NA	NA	Inf	35	4510-01-24	7	1	1	2	2	TRUE	239	10	12	NA	0.27	0	0	0	0	0.0220611	1.00096	4510-01-17	Inf	FALSE	NOT Hispanic or Latino	NEVER	7	Male	FALSE	FALSE	FALSE	FALSE	FALSE	M	1	non-black
77	OUTPATIENT	Low	Final result	0.37	4511-02-19	4511-02-19	Yes	CREATININE	0.37	0.25	4510-01-24	0	NA	NA	Inf	35	4510-01-24	7	1	1	2	2	TRUE	239	10	12	NA	0.27	0	0	0	0	0.0220611	1.00096	4510-01-17	Inf	FALSE	NOT Hispanic or Latino	NEVER	7	Male	FALSE	FALSE	FALSE	FALSE	FALSE	M	1	non-black
78	OUTPATIENT	Low	Final result	0.41	4511-03-06	4511-03-06	Yes	CREATININE	0.41	0.25	4510-01-24	0	NA	NA	Inf	35	4510-01-24	7	1	1	2	2	TRUE	239	10	12	NA	0.27	0	0	0	0	0.0220611	1.00096	4510-01-17	Inf	FALSE	NOT Hispanic or Latino	NEVER	7	Male	FALSE	FALSE	FALSE	FALSE	FALSE	M	1	non-black
79	OUTPATIENT	Low	Final result	0.43	4511-03-07	4511-03-07	Yes	CREATININE	0.43	0.25	4510-01-24	0	NA	NA	Inf	35	4510-01-24	7	1	1	2	2	TRUE	239	10	12	NA	0.27	0	0	0	0	0.0220611	1.00096	4510-01-17	Inf	FALSE	NOT Hispanic or Latino	NEVER	7	Male	FALSE	FALSE	FALSE	FALSE	FALSE	M	1	non-black
80	OUTPATIENT	Low	Final result	0.43	4510-12-29	4510-12-29	Yes	CREATININE	0.43	0.25	4510-01-24	0	NA	NA	Inf	35	4510-01-24	7	1	1	2	2	TRUE	239	10	12	NA	0.27	0	0	0	0	0.0220611	1.00096	4510-01-17	Inf	FALSE	NOT Hispanic or Latino	NEVER	7	Male	FALSE	FALSE	FALSE	FALSE	FALSE	M	1	non-black
81	OUTPATIENT	Low	Final result	0.28	4510-12-26	4510-12-26	Yes	CREATININE	0.28	0.25	4510-01-24	0	NA	NA	Inf	35	4510-01-24	7	1	1	2	2	TRUE	239	10	12	NA	0.27	0	0	0	0	0.0220611	1.00096	4510-01-17	Inf	FALSE	NOT Hispanic or Latino	NEVER	7	Male	FALSE	FALSE	FALSE	FALSE	FALSE	M	1	non-black
82	OUTPATIENT	Low	Final result	0.25	4511-01-18	4511-01-18	Yes	CREATININE	0.25	0.25	4510-01-24	0	NA	NA	Inf	35	4510-01-24	7	1	1	2	2	TRUE	239	10	12	NA	0.27	0	0	0	0	0.0220611	1.00096	4510-01-17	Inf	FALSE	NOT Hispanic or Latino	NEVER	7	Male	FALSE	FALSE	FALSE	FALSE	FALSE	M	1	non-black
83	OUTPATIENT	Low	Final result	0.27	4511-01-18	4511-01-18	Yes	CREATININE	0.27	0.25	4510-01-24	0	NA	NA	Inf	35	4510-01-24	7	1	1	2	2	TRUE	239	10	12	NA	0.27	0	0	0	0	0.0220611	1.00096	4510-01-17	Inf	FALSE	NOT Hispanic or Latino	NEVER	7	Male	FALSE	FALSE	FALSE	FALSE	FALSE	M	1	non-black
84	OUTPATIENT	Low	Final result	0.25	4511-01-17	4511-01-17	Yes	CREATININE	0.25	0.25	4510-01-24	0	NA	NA	Inf	35	4510-01-24	7	1	1	2	2	TRUE	239	10	12	NA	0.27	0	0	0	0	0.0220611	1.00096	4510-01-17	Inf	FALSE	NOT Hispanic or Latino	NEVER	7	Male	FALSE	FALSE	FALSE	FALSE	FALSE	M	1	non-black
85	OUTPATIENT	Low	Final result	0.26	4511-01-17	4511-01-17	Yes	CREATININE	0.26	0.25	4510-01-24	0	NA	NA	Inf	35	4510-01-24	7	1	1	2	2	TRUE	239	10	12	NA	0.27	0	0	0	0	0.0220611	1.00096	4510-01-17	Inf	FALSE	NOT Hispanic or Latino	NEVER	7	Male	FALSE	FALSE	FALSE	FALSE	FALSE	M	1	non-black
86	OUTPATIENT	Low	Final result	0.35	4511-01-06	4511-01-06	Yes	CREATININE	0.35	0.25	4510-01-24	0	NA	NA	Inf	35	4510-01-24	7	1	1	2	2	TRUE	239	10	12	NA	0.27	0	0	0	0	0.0220611	1.00096	4510-01-17	Inf	FALSE	NOT Hispanic or Latino	NEVER	7	Male	FALSE	FALSE	FALSE	FALSE	FALSE	M	1	non-black
87	OUTPATIENT	Low	Final result	0.44	4511-01-03	4511-01-03	Yes	CREATININE	0.44	0.25	4510-01-24	0	NA	NA	Inf	35	4510-01-24	7	1	1	2	2	TRUE	239	10	12	NA	0.27	0	0	0	0	0.0220611	1.00096	4510-01-17	Inf	FALSE	NOT Hispanic or Latino	NEVER	7	Male	FALSE	FALSE	FALSE	FALSE	FALSE	M	1	non-black
88	OUTPATIENT	Low	Final result	0.34	4511-01-01	4511-01-01	Yes	CREATININE	0.34	0.25	4510-01-24	0	NA	NA	Inf	35	4510-01-24	7	1	1	2	2	TRUE	239	10	12	NA	0.27	0	0	0	0	0.0220611	1.00096	4510-01-17	Inf	FALSE	NOT Hispanic or Latino	NEVER	7	Male	FALSE	FALSE	FALSE	FALSE	FALSE	M	1	non-black
89	OUTPATIENT	Low	Final result	0.29	4510-12-25	4510-12-25	Yes	CREATININE	0.29	0.25	4510-01-24	0	NA	NA	Inf	35	4510-01-24	7	1	1	2	2	TRUE	239	10	12	NA	0.27	0	0	0	0	0.0220611	1.00096	4510-01-17	Inf	FALSE	NOT Hispanic or Latino	NEVER	7	Male	FALSE	FALSE	FALSE	FALSE	FALSE	M	1	non-black
90	OUTPATIENT	Low	Final result	0.29	4510-12-19	4510-12-19	Yes	CREATININE	0.29	0.25	4510-01-24	0	NA	NA	Inf	35	4510-01-24	7	1	1	2	2	TRUE	239	10	12	NA	0.27	0	0	0	0	0.0220611	1.00096	4510-01-17	Inf	FALSE	NOT Hispanic or Latino	NEVER	7	Male	FALSE	FALSE	FALSE	FALSE	FALSE	M	1	non-black
91	OUTPATIENT	*Unspecified	Final result	0.8	4511-01-11	4511-01-11	Yes	CREATININE	0.8	0.25	4510-01-24	0	NA	NA	Inf	35	4510-01-24	7	1	1	2	2	TRUE	239	10	12	NA	0.27	0	0	0	0	0.0220611	1.00096	4510-01-17	Inf	FALSE	NOT Hispanic or Latino	NEVER	7	Male	FALSE	FALSE	FALSE	FALSE	FALSE	M	1	non-black
92	OUTPATIENT	Low	Final result	0.46	4511-03-04	4511-03-04	Yes	CREATININE	0.46	0.25	4510-01-24	0	NA	NA	Inf	35	4510-01-24	7	1	1	2	2	TRUE	239	10	12	NA	0.27	0	0	0	0	0.0220611	1.00096	4510-01-17	Inf	FALSE	NOT Hispanic or Latino	NEVER	7	Male	FALSE	FALSE	FALSE	FALSE	FALSE	M	1	non-black
93	OUTPATIENT	Low	Final result	0.45	4511-03-02	4511-03-02	Yes	CREATININE	0.45	0.25	4510-01-24	0	NA	NA	Inf	35	4510-01-24	7	1	1	2	2	TRUE	239	10	12	NA	0.27	0	0	0	0	0.0220611	1.00096	4510-01-17	Inf	FALSE	NOT Hispanic or Latino	NEVER	7	Male	FALSE	FALSE	FALSE	FALSE	FALSE	M	1	non-black
94	OUTPATIENT	Low	Final result	0.56	4510-12-23	4510-12-23	Yes	CREATININE	0.56	0.25	4510-01-24	0	NA	NA	Inf	35	4510-01-24	7	1	1	2	2	TRUE	239	10	12	NA	0.27	0	0	0	0	0.0220611	1.00096	4510-01-17	Inf	FALSE	NOT Hispanic or Latino	NEVER	7	Male	FALSE	FALSE	FALSE	FALSE	FALSE	M	1	non-black
95	OUTPATIENT	Low	Preliminary result	0.33	4510-12-22	4510-12-22	No	CREATININE	0.33	0.25	4510-01-24	0	NA	NA	Inf	35	4510-01-24	7	1	1	2	2	TRUE	239	10	12	NA	0.27	0	0	0	0	0.0220611	1.00096	4510-01-17	Inf	FALSE	NOT Hispanic or Latino	NEVER	7	Male	FALSE	FALSE	FALSE	FALSE	FALSE	M	1	non-black
96	OUTPATIENT	Low	Final result	0.38	4510-12-27	4510-12-27	Yes	CREATININE	0.38	0.25	4510-01-24	0	NA	NA	Inf	35	4510-01-24	7	1	1	2	2	TRUE	239	10	12	NA	0.27	0	0	0	0	0.0220611	1.00096	4510-01-17	Inf	FALSE	NOT Hispanic or Latino	NEVER	7	Male	FALSE	FALSE	FALSE	FALSE	FALSE	M	1	non-black
97	OUTPATIENT	Low	Final result	0.33	4510-12-24	4510-12-24	Yes	CREATININE	0.33	0.25	4510-01-24	0	NA	NA	Inf	35	4510-01-24	7	1	1	2	2	TRUE	239	10	12	NA	0.27	0	0	0	0	0.0220611	1.00096	4510-01-17	Inf	FALSE	NOT Hispanic or Latino	NEVER	7	Male	FALSE	FALSE	FALSE	FALSE	FALSE	M	1	non-black
98	OUTPATIENT	Low	Final result	0.31	4511-01-08	4511-01-08	Yes	CREATININE	0.31	0.25	4510-01-24	0	NA	NA	Inf	35	4510-01-24	7	1	1	2	2	TRUE	239	10	12	NA	0.27	0	0	0	0	0.0220611	1.00096	4510-01-17	Inf	FALSE	NOT Hispanic or Latino	NEVER	7	Male	FALSE	FALSE	FALSE	FALSE	FALSE	M	1	non-black
99	OUTPATIENT	Low	Final result	0.41	4511-01-09	4511-01-09	Yes	CREATININE	0.41	0.25	4510-01-24	0	NA	NA	Inf	35	4510-01-24	7	1	1	2	2	TRUE	239	10	12	NA	0.27	0	0	0	0	0.0220611	1.00096	4510-01-17	Inf	FALSE	NOT Hispanic or Latino	NEVER	7	Male	FALSE	FALSE	FALSE	FALSE	FALSE	M	1	non-black
100	OUTPATIENT	Low	Final result	0.42	4511-01-04	4511-01-04	Yes	CREATININE	0.42	0.25	4510-01-24	0	NA	NA	Inf	35	4510-01-24	7	1	1	2	2	TRUE	239	10	12	NA	0.27	0	0	0	0	0.0220611	1.00096	4510-01-17	Inf	FALSE	NOT Hispanic or Latino	NEVER	7	Male	FALSE	FALSE	FALSE	FALSE	FALSE	M	1	non-black
101	OUTPATIENT	Low	Final result	0.32	4511-02-02	4511-02-02	Yes	CREATININE	0.32	0.25	4510-01-24	0	NA	NA	Inf	35	4510-01-24	7	1	1	2	2	TRUE	239	10	12	NA	0.27	0	0	0	0	0.0220611	1.00096	4510-01-17	Inf	FALSE	NOT Hispanic or Latino	NEVER	7	Male	FALSE	FALSE	FALSE	FALSE	FALSE	M	1	non-black
102	OUTPATIENT	Low	Final result	0.32	4511-01-31	4511-01-31	Yes	CREATININE	0.32	0.25	4510-01-24	0	NA	NA	Inf	35	4510-01-24	7	1	1	2	2	TRUE	239	10	12	NA	0.27	0	0	0	0	0.0220611	1.00096	4510-01-17	Inf	FALSE	NOT Hispanic or Latino	NEVER	7	Male	FALSE	FALSE	FALSE	FALSE	FALSE	M	1	non-black
103	OUTPATIENT	Low	Final result	0.32	4511-02-03	4511-02-03	Yes	CREATININE	0.32	0.25	4510-01-24	0	NA	NA	Inf	35	4510-01-24	7	1	1	2	2	TRUE	239	10	12	NA	0.27	0	0	0	0	0.0220611	1.00096	4510-01-17	Inf	FALSE	NOT Hispanic or Latino	NEVER	7	Male	FALSE	FALSE	FALSE	FALSE	FALSE	M	1	non-black
104	OUTPATIENT	Low	Final result	0.21	4511-01-18	4511-01-18	Yes	CREATININE	0.21	0.25	4510-01-24	0	NA	NA	Inf	35	4510-01-24	7	1	1	2	2	TRUE	239	10	12	NA	0.27	0	0	0	0	0.0220611	1.00096	4510-01-17	Inf	FALSE	NOT Hispanic or Latino	NEVER	7	Male	FALSE	FALSE	FALSE	FALSE	FALSE	M	1	non-black
105	OUTPATIENT	Low	Final result	0.24	4511-01-16	4511-01-16	Yes	CREATININE	0.24	0.25	4510-01-24	0	NA	NA	Inf	35	4510-01-24	7	1	1	2	2	TRUE	239	10	12	NA	0.27	0	0	0	0	0.0220611	1.00096	4510-01-17	Inf	FALSE	NOT Hispanic or Latino	NEVER	7	Male	FALSE	FALSE	FALSE	FALSE	FALSE	M	1	non-black
106	OUTPATIENT	Low	Final result	0.24	4511-01-19	4511-01-19	Yes	CREATININE	0.24	0.25	4510-01-24	0	NA	NA	Inf	35	4510-01-24	7	1	1	2	2	TRUE	239	10	12	NA	0.27	0	0	0	0	0.0220611	1.00096	4510-01-17	Inf	FALSE	NOT Hispanic or Latino	NEVER	7	Male	FALSE	FALSE	FALSE	FALSE	FALSE	M	1	non-black
107	OUTPATIENT	Low	Final result	0.25	4511-01-17	4511-01-17	Yes	CREATININE	0.25	0.25	4510-01-24	0	NA	NA	Inf	35	4510-01-24	7	1	1	2	2	TRUE	239	10	12	NA	0.27	0	0	0	0	0.0220611	1.00096	4510-01-17	Inf	FALSE	NOT Hispanic or Latino	NEVER	7	Male	FALSE	FALSE	FALSE	FALSE	FALSE	M	1	non-black
108	OUTPATIENT	Low	Final result	0.31	4511-01-19	4511-01-20	Yes	CREATININE	0.31	0.25	4510-01-24	0	NA	NA	Inf	35	4510-01-24	7	1	1	2	2	TRUE	239	10	12	NA	0.27	0	0	0	0	0.0220611	1.00096	4510-01-17	Inf	FALSE	NOT Hispanic or Latino	NEVER	7	Male	FALSE	FALSE	FALSE	FALSE	FALSE	M	1	non-black
109	OUTPATIENT	Low	Final result	0.24	4511-01-19	4511-01-19	Yes	CREATININE	0.24	0.25	4510-01-24	0	NA	NA	Inf	35	4510-01-24	7	1	1	2	2	TRUE	239	10	12	NA	0.27	0	0	0	0	0.0220611	1.00096	4510-01-17	Inf	FALSE	NOT Hispanic or Latino	NEVER	7	Male	FALSE	FALSE	FALSE	FALSE	FALSE	M	1	non-black
110	OUTPATIENT	Low	Final result	0.23	4511-01-18	4511-01-18	Yes	CREATININE	0.23	0.25	4510-01-24	0	NA	NA	Inf	35	4510-01-24	7	1	1	2	2	TRUE	239	10	12	NA	0.27	0	0	0	0	0.0220611	1.00096	4510-01-17	Inf	FALSE	NOT Hispanic or Latino	NEVER	7	Male	FALSE	FALSE	FALSE	FALSE	FALSE	M	1	non-black
111	OUTPATIENT	Low	Final result	0.22	4511-01-18	4511-01-18	Yes	CREATININE	0.22	0.25	4510-01-24	0	NA	NA	Inf	35	4510-01-24	7	1	1	2	2	TRUE	239	10	12	NA	0.27	0	0	0	0	0.0220611	1.00096	4510-01-17	Inf	FALSE	NOT Hispanic or Latino	NEVER	7	Male	FALSE	FALSE	FALSE	FALSE	FALSE	M	1	non-black
112	OUTPATIENT	Low	Final result	0.27	4511-01-22	4511-01-22	Yes	CREATININE	0.27	0.25	4510-01-24	0	NA	NA	Inf	35	4510-01-24	7	1	1	2	2	TRUE	239	10	12	NA	0.27	0	0	0	0	0.0220611	1.00096	4510-01-17	Inf	FALSE	NOT Hispanic or Latino	NEVER	7	Male	FALSE	FALSE	FALSE	FALSE	FALSE	M	1	non-black
113	OUTPATIENT	Low	Final result	0.46	4511-03-11	4511-03-11	Yes	CREATININE	0.46	0.25	4510-01-24	0	NA	NA	Inf	35	4510-01-24	7	1	1	2	2	TRUE	239	10	12	NA	0.27	0	0	0	0	0.0220611	1.00096	4510-01-17	Inf	FALSE	NOT Hispanic or Latino	NEVER	7	Male	FALSE	FALSE	FALSE	FALSE	FALSE	M	1	non-black
114	OUTPATIENT	Low	Final result	0.39	4510-12-18	4510-12-18	Yes	CREATININE	0.39	0.25	4510-01-24	0	NA	NA	Inf	35	4510-01-24	7	1	1	2	2	TRUE	239	10	12	NA	0.27	0	0	0	0	0.0220611	1.00096	4510-01-17	Inf	FALSE	NOT Hispanic or Latino	NEVER	7	Male	FALSE	FALSE	FALSE	FALSE	FALSE	M	1	non-black
115	OUTPATIENT	Low	Final result	0.36	4510-12-28	4510-12-28	Yes	CREATININE	0.36	0.25	4510-01-24	0	NA	NA	Inf	35	4510-01-24	7	1	1	2	2	TRUE	239	10	12	NA	0.27	0	0	0	0	0.0220611	1.00096	4510-01-17	Inf	FALSE	NOT Hispanic or Latino	NEVER	7	Male	FALSE	FALSE	FALSE	FALSE	FALSE	M	1	non-black
116	OUTPATIENT	Low	Final result	0.43	4510-12-21	4510-12-21	Yes	CREATININE	0.43	0.25	4510-01-24	0	NA	NA	Inf	35	4510-01-24	7	1	1	2	2	TRUE	239	10	12	NA	0.27	0	0	0	0	0.0220611	1.00096	4510-01-17	Inf	FALSE	NOT Hispanic or Latino	NEVER	7	Male	FALSE	FALSE	FALSE	FALSE	FALSE	M	1	non-black
117	OUTPATIENT	Low	Final result	0.36	4510-12-17	4510-12-17	Yes	CREATININE	0.36	0.25	4510-01-24	0	NA	NA	Inf	35	4510-01-24	7	1	1	2	2	TRUE	239	10	12	NA	0.27	0	0	0	0	0.0220611	1.00096	4510-01-17	Inf	FALSE	NOT Hispanic or Latino	NEVER	7	Male	FALSE	FALSE	FALSE	FALSE	FALSE	M	1	non-black
118	OUTPATIENT	Low	Final result	0.42	4510-12-16	4510-12-16	Yes	CREATININE	0.42	0.25	4510-01-24	0	NA	NA	Inf	35	4510-01-24	7	1	1	2	2	TRUE	239	10	12	NA	0.27	0	0	0	0	0.0220611	1.00096	4510-01-17	Inf	FALSE	NOT Hispanic or Latino	NEVER	7	Male	FALSE	FALSE	FALSE	FALSE	FALSE	M	1	non-black
119	OUTPATIENT	Low	Final result	0.31	4511-01-14	4511-01-14	Yes	CREATININE	0.31	0.25	4510-01-24	0	NA	NA	Inf	35	4510-01-24	7	1	1	2	2	TRUE	239	10	12	NA	0.27	0	0	0	0	0.0220611	1.00096	4510-01-17	Inf	FALSE	NOT Hispanic or Latino	NEVER	7	Male	FALSE	FALSE	FALSE	FALSE	FALSE	M	1	non-black
120	OUTPATIENT	Low	Final result	0.24	4511-01-15	4511-01-15	Yes	CREATININE	0.24	0.25	4510-01-24	0	NA	NA	Inf	35	4510-01-24	7	1	1	2	2	TRUE	239	10	12	NA	0.27	0	0	0	0	0.0220611	1.00096	4510-01-17	Inf	FALSE	NOT Hispanic or Latino	NEVER	7	Male	FALSE	FALSE	FALSE	FALSE	FALSE	M	1	non-black
121	OUTPATIENT	Low	Final result	0.36	4511-02-05	4511-02-05	Yes	CREATININE	0.36	0.25	4510-01-24	0	NA	NA	Inf	35	4510-01-24	7	1	1	2	2	TRUE	239	10	12	NA	0.27	0	0	0	0	0.0220611	1.00096	4510-01-17	Inf	FALSE	NOT Hispanic or Latino	NEVER	7	Male	FALSE	FALSE	FALSE	FALSE	FALSE	M	1	non-black
122	OUTPATIENT	Low	Final result	0.69	4511-01-11	4511-01-11	Yes	CREATININE	0.69	0.25	4510-01-24	0	NA	NA	Inf	35	4510-01-24	7	1	1	2	2	TRUE	239	10	12	NA	0.27	0	0	0	0	0.0220611	1.00096	4510-01-17	Inf	FALSE	NOT Hispanic or Latino	NEVER	7	Male	FALSE	FALSE	FALSE	FALSE	FALSE	M	1	non-black
123	OUTPATIENT	Low	Final result	0.59	4511-01-05	4511-01-05	Yes	CREATININE	0.59	0.25	4510-01-24	0	NA	NA	Inf	35	4510-01-24	7	1	1	2	2	TRUE	239	10	12	NA	0.27	0	0	0	0	0.0220611	1.00096	4510-01-17	Inf	FALSE	NOT Hispanic or Latino	NEVER	7	Male	FALSE	FALSE	FALSE	FALSE	FALSE	M	1	non-black
124	OUTPATIENT	Low	Final result	0.35	4511-01-07	4511-01-07	Yes	CREATININE	0.35	0.25	4510-01-24	0	NA	NA	Inf	35	4510-01-24	7	1	1	2	2	TRUE	239	10	12	NA	0.27	0	0	0	0	0.0220611	1.00096	4510-01-17	Inf	FALSE	NOT Hispanic or Latino	NEVER	7	Male	FALSE	FALSE	FALSE	FALSE	FALSE	M	1	non-black
125	OUTPATIENT	Low	Final result	0.35	4511-01-07	4511-01-07	Yes	CREATININE	0.35	0.25	4510-01-24	0	NA	NA	Inf	35	4510-01-24	7	1	1	2	2	TRUE	239	10	12	NA	0.27	0	0	0	0	0.0220611	1.00096	4510-01-17	Inf	FALSE	NOT Hispanic or Latino	NEVER	7	Male	FALSE	FALSE	FALSE	FALSE	FALSE	M	1	non-black
126	OUTPATIENT	Low	Final result	0.35	4511-02-01	4511-02-01	Yes	CREATININE	0.35	0.25	4510-01-24	0	NA	NA	Inf	35	4510-01-24	7	1	1	2	2	TRUE	239	10	12	NA	0.27	0	0	0	0	0.0220611	1.00096	4510-01-17	Inf	FALSE	NOT Hispanic or Latino	NEVER	7	Male	FALSE	FALSE	FALSE	FALSE	FALSE	M	1	non-black
127	OUTPATIENT	Low	Final result	0.31	4511-01-29	4511-01-29	Yes	CREATININE	0.31	0.25	4510-01-24	0	NA	NA	Inf	35	4510-01-24	7	1	1	2	2	TRUE	239	10	12	NA	0.27	0	0	0	0	0.0220611	1.00096	4510-01-17	Inf	FALSE	NOT Hispanic or Latino	NEVER	7	Male	FALSE	FALSE	FALSE	FALSE	FALSE	M	1	non-black
128	OUTPATIENT	Low	Final result	0.26	4511-01-30	4511-01-30	Yes	CREATININE	0.26	0.25	4510-01-24	0	NA	NA	Inf	35	4510-01-24	7	1	1	2	2	TRUE	239	10	12	NA	0.27	0	0	0	0	0.0220611	1.00096	4510-01-17	Inf	FALSE	NOT Hispanic or Latino	NEVER	7	Male	FALSE	FALSE	FALSE	FALSE	FALSE	M	1	non-black
129	OUTPATIENT	Low	Final result	0.31	4511-01-28	4511-01-28	Yes	CREATININE	0.31	0.25	4510-01-24	0	NA	NA	Inf	35	4510-01-24	7	1	1	2	2	TRUE	239	10	12	NA	0.27	0	0	0	0	0.0220611	1.00096	4510-01-17	Inf	FALSE	NOT Hispanic or Latino	NEVER	7	Male	FALSE	FALSE	FALSE	FALSE	FALSE	M	1	non-black
130	OUTPATIENT	Low	Final result	0.38	4511-01-02	4511-01-02	Yes	CREATININE	0.38	0.25	4510-01-24	0	NA	NA	Inf	35	4510-01-24	7	1	1	2	2	TRUE	239	10	12	NA	0.27	0	0	0	0	0.0220611	1.00096	4510-01-17	Inf	FALSE	NOT Hispanic or Latino	NEVER	7	Male	FALSE	FALSE	FALSE	FALSE	FALSE	M	1	non-black
131	OUTPATIENT	Low	Final result	0.32	4511-01-13	4511-01-13	Yes	CREATININE	0.32	0.25	4510-01-24	0	NA	NA	Inf	35	4510-01-24	7	1	1	2	2	TRUE	239	10	12	NA	0.27	0	0	0	0	0.0220611	1.00096	4510-01-17	Inf	FALSE	NOT Hispanic or Latino	NEVER	7	Male	FALSE	FALSE	FALSE	FALSE	FALSE	M	1	non-black
132	OUTPATIENT	Low	Final result	0.47	4511-01-13	4511-01-13	Yes	CREATININE	0.47	0.25	4510-01-24	0	NA	NA	Inf	35	4510-01-24	7	1	1	2	2	TRUE	239	10	12	NA	0.27	0	0	0	0	0.0220611	1.00096	4510-01-17	Inf	FALSE	NOT Hispanic or Latino	NEVER	7	Male	FALSE	FALSE	FALSE	FALSE	FALSE	M	1	non-black
133	OUTPATIENT	Low	Final result	0.29	4511-01-15	4511-01-15	Yes	CREATININE	0.29	0.25	4510-01-24	0	NA	NA	Inf	35	4510-01-24	7	1	1	2	2	TRUE	239	10	12	NA	0.27	0	0	0	0	0.0220611	1.00096	4510-01-17	Inf	FALSE	NOT Hispanic or Latino	NEVER	7	Male	FALSE	FALSE	FALSE	FALSE	FALSE	M	1	non-black
134	OUTPATIENT	Low	Final result	0.28	4511-01-15	4511-01-15	Yes	CREATININE	0.28	0.25	4510-01-24	0	NA	NA	Inf	35	4510-01-24	7	1	1	2	2	TRUE	239	10	12	NA	0.27	0	0	0	0	0.0220611	1.00096	4510-01-17	Inf	FALSE	NOT Hispanic or Latino	NEVER	7	Male	FALSE	FALSE	FALSE	FALSE	FALSE	M	1	non-black
135	OUTPATIENT	Low	Final result	0.27	4511-01-16	4511-01-16	Yes	CREATININE	0.27	0.25	4510-01-24	0	NA	NA	Inf	35	4510-01-24	7	1	1	2	2	TRUE	239	10	12	NA	0.27	0	0	0	0	0.0220611	1.00096	4510-01-17	Inf	FALSE	NOT Hispanic or Latino	NEVER	7	Male	FALSE	FALSE	FALSE	FALSE	FALSE	M	1	non-black
136	OUTPATIENT	Low	Final result	0.29	4511-01-16	4511-01-16	Yes	CREATININE	0.29	0.25	4510-01-24	0	NA	NA	Inf	35	4510-01-24	7	1	1	2	2	TRUE	239	10	12	NA	0.27	0	0	0	0	0.0220611	1.00096	4510-01-17	Inf	FALSE	NOT Hispanic or Latino	NEVER	7	Male	FALSE	FALSE	FALSE	FALSE	FALSE	M	1	non-black
137	OUTPATIENT	Low	Preliminary result	0.28	4511-01-14	4511-01-14	No	CREATININE	0.28	0.25	4510-01-24	0	NA	NA	Inf	35	4510-01-24	7	1	1	2	2	TRUE	239	10	12	NA	0.27	0	0	0	0	0.0220611	1.00096	4510-01-17	Inf	FALSE	NOT Hispanic or Latino	NEVER	7	Male	FALSE	FALSE	FALSE	FALSE	FALSE	M	1	non-black
138	OUTPATIENT	Low	Final result	0.27	4511-02-04	4511-02-04	Yes	CREATININE	0.27	0.25	4510-01-24	0	NA	NA	Inf	35	4510-01-24	7	1	1	2	2	TRUE	239	10	12	NA	0.27	0	0	0	0	0.0220611	1.00096	4510-01-17	Inf	FALSE	NOT Hispanic or Latino	NEVER	7	Male	FALSE	FALSE	FALSE	FALSE	FALSE	M	1	non-black
139	OUTPATIENT	Low	Final result	0.28	4511-02-04	4511-02-05	Yes	CREATININE	0.28	0.25	4510-01-24	0	NA	NA	Inf	35	4510-01-24	7	1	1	2	2	TRUE	239	10	12	NA	0.27	0	0	0	0	0.0220611	1.00096	4510-01-17	Inf	FALSE	NOT Hispanic or Latino	NEVER	7	Male	FALSE	FALSE	FALSE	FALSE	FALSE	M	1	non-black
140	OUTPATIENT	Low	Final result	0.33	4511-02-06	4511-02-06	Yes	CREATININE	0.33	0.25	4510-01-24	0	NA	NA	Inf	35	4510-01-24	7	1	1	2	2	TRUE	239	10	12	NA	0.27	0	0	0	0	0.0220611	1.00096	4510-01-17	Inf	FALSE	NOT Hispanic or Latino	NEVER	7	Male	FALSE	FALSE	FALSE	FALSE	FALSE	M	1	non-black
141	OUTPATIENT	Low	Final result	0.41	4511-02-24	4511-02-24	Yes	CREATININE	0.41	0.25	4510-01-24	0	NA	NA	Inf	35	4510-01-24	7	1	1	2	2	TRUE	239	10	12	NA	0.27	0	0	0	0	0.0220611	1.00096	4510-01-17	Inf	FALSE	NOT Hispanic or Latino	NEVER	7	Male	FALSE	FALSE	FALSE	FALSE	FALSE	M	1	non-black
142	OUTPATIENT	Low	Final result	0.4	4511-02-20	4511-02-20	Yes	CREATININE	0.4	0.25	4510-01-24	0	NA	NA	Inf	35	4510-01-24	7	1	1	2	2	TRUE	239	10	12	NA	0.27	0	0	0	0	0.0220611	1.00096	4510-01-17	Inf	FALSE	NOT Hispanic or Latino	NEVER	7	Male	FALSE	FALSE	FALSE	FALSE	FALSE	M	1	non-black
143	OUTPATIENT	Low	Final result	0.46	4511-02-23	4511-02-23	Yes	CREATININE	0.46	0.25	4510-01-24	0	NA	NA	Inf	35	4510-01-24	7	1	1	2	2	TRUE	239	10	12	NA	0.27	0	0	0	0	0.0220611	1.00096	4510-01-17	Inf	FALSE	NOT Hispanic or Latino	NEVER	7	Male	FALSE	FALSE	FALSE	FALSE	FALSE	M	1	non-black
144	OUTPATIENT	Low	Final result	0.39	4511-02-21	4511-02-21	Yes	CREATININE	0.39	0.25	4510-01-24	0	NA	NA	Inf	35	4510-01-24	7	1	1	2	2	TRUE	239	10	12	NA	0.27	0	0	0	0	0.0220611	1.00096	4510-01-17	Inf	FALSE	NOT Hispanic or Latino	NEVER	7	Male	FALSE	FALSE	FALSE	FALSE	FALSE	M	1	non-black
145	OUTPATIENT	Low	Final result	0.31	4511-02-14	4511-02-14	Yes	CREATININE	0.31	0.25	4510-01-24	0	NA	NA	Inf	35	4510-01-24	7	1	1	2	2	TRUE	239	10	12	NA	0.27	0	0	0	0	0.0220611	1.00096	4510-01-17	Inf	FALSE	NOT Hispanic or Latino	NEVER	7	Male	FALSE	FALSE	FALSE	FALSE	FALSE	M	1	non-black
146	OUTPATIENT	Low	Final result	0.31	4511-02-09	4511-02-09	Yes	CREATININE	0.31	0.25	4510-01-24	0	NA	NA	Inf	35	4510-01-24	7	1	1	2	2	TRUE	239	10	12	NA	0.27	0	0	0	0	0.0220611	1.00096	4510-01-17	Inf	FALSE	NOT Hispanic or Latino	NEVER	7	Male	FALSE	FALSE	FALSE	FALSE	FALSE	M	1	non-black
147	OUTPATIENT	Low	Final result	0.53	4511-02-26	4511-02-26	Yes	CREATININE	0.53	0.25	4510-01-24	0	NA	NA	Inf	35	4510-01-24	7	1	1	2	2	TRUE	239	10	12	NA	0.27	0	0	0	0	0.0220611	1.00096	4510-01-17	Inf	FALSE	NOT Hispanic or Latino	NEVER	7	Male	FALSE	FALSE	FALSE	FALSE	FALSE	M	1	non-black
148	OUTPATIENT	Low	Final result	0.52	4511-02-27	4511-02-27	Yes	CREATININE	0.52	0.25	4510-01-24	0	NA	NA	Inf	35	4510-01-24	7	1	1	2	2	TRUE	239	10	12	NA	0.27	0	0	0	0	0.0220611	1.00096	4510-01-17	Inf	FALSE	NOT Hispanic or Latino	NEVER	7	Male	FALSE	FALSE	FALSE	FALSE	FALSE	M	1	non-black
149	OUTPATIENT	Low	Final result	0.42	4511-02-25	4511-02-25	Yes	CREATININE	0.42	0.25	4510-01-24	0	NA	NA	Inf	35	4510-01-24	7	1	1	2	2	TRUE	239	10	12	NA	0.27	0	0	0	0	0.0220611	1.00096	4510-01-17	Inf	FALSE	NOT Hispanic or Latino	NEVER	7	Male	FALSE	FALSE	FALSE	FALSE	FALSE	M	1	non-black
150	OUTPATIENT	Low	Final result	0.49	4511-01-12	4511-01-12	Yes	CREATININE	0.49	0.25	4510-01-24	0	NA	NA	Inf	35	4510-01-24	7	1	1	2	2	TRUE	239	10	12	NA	0.27	0	0	0	0	0.0220611	1.00096	4510-01-17	Inf	FALSE	NOT Hispanic or Latino	NEVER	7	Male	FALSE	FALSE	FALSE	FALSE	FALSE	M	1	non-black
151	OUTPATIENT	Low	Final result	0.49	4511-02-23	4511-02-23	Yes	CREATININE	0.49	0.25	4510-01-24	0	NA	NA	Inf	35	4510-01-24	7	1	1	2	2	TRUE	239	10	12	NA	0.27	0	0	0	0	0.0220611	1.00096	4510-01-17	Inf	FALSE	NOT Hispanic or Latino	NEVER	7	Male	FALSE	FALSE	FALSE	FALSE	FALSE	M	1	non-black
152	OUTPATIENT	Low	Final result	0.38	4511-02-18	4511-02-18	Yes	CREATININE	0.38	0.25	4510-01-24	0	NA	NA	Inf	35	4510-01-24	7	1	1	2	2	TRUE	239	10	12	NA	0.27	0	0	0	0	0.0220611	1.00096	4510-01-17	Inf	FALSE	NOT Hispanic or Latino	NEVER	7	Male	FALSE	FALSE	FALSE	FALSE	FALSE	M	1	non-black
153	OUTPATIENT	Low	Final result	0.26	4511-01-25	4511-01-25	Yes	CREATININE	0.26	0.25	4510-01-24	0	NA	NA	Inf	35	4510-01-24	7	1	1	2	2	TRUE	239	10	12	NA	0.27	0	0	0	0	0.0220611	1.00096	4510-01-17	Inf	FALSE	NOT Hispanic or Latino	NEVER	7	Male	FALSE	FALSE	FALSE	FALSE	FALSE	M	1	non-black
154	OUTPATIENT	Low	Final result	0.24	4511-01-20	4511-01-20	Yes	CREATININE	0.24	0.25	4510-01-24	0	NA	NA	Inf	35	4510-01-24	7	1	1	2	2	TRUE	239	10	12	NA	0.27	0	0	0	0	0.0220611	1.00096	4510-01-17	Inf	FALSE	NOT Hispanic or Latino	NEVER	7	Male	FALSE	FALSE	FALSE	FALSE	FALSE	M	1	non-black
155	OUTPATIENT	Low	Final result	0.27	4511-01-20	4511-01-20	Yes	CREATININE	0.27	0.25	4510-01-24	0	NA	NA	Inf	35	4510-01-24	7	1	1	2	2	TRUE	239	10	12	NA	0.27	0	0	0	0	0.0220611	1.00096	4510-01-17	Inf	FALSE	NOT Hispanic or Latino	NEVER	7	Male	FALSE	FALSE	FALSE	FALSE	FALSE	M	1	non-black
156	OUTPATIENT	Low	Final result	0.31	4511-01-21	4511-01-21	Yes	CREATININE	0.31	0.25	4510-01-24	0	NA	NA	Inf	35	4510-01-24	7	1	1	2	2	TRUE	239	10	12	NA	0.27	0	0	0	0	0.0220611	1.00096	4510-01-17	Inf	FALSE	NOT Hispanic or Latino	NEVER	7	Male	FALSE	FALSE	FALSE	FALSE	FALSE	M	1	non-black
157	OUTPATIENT	Low	Final result	0.45	4510-11-29	4510-11-29	Yes	CREATININE	0.45	0.25	4510-01-24	0	NA	NA	Inf	35	4510-01-24	7	1	1	2	2	TRUE	239	10	12	NA	0.27	0	0	0	0	0.0220611	1.00096	4510-01-17	Inf	FALSE	NOT Hispanic or Latino	NEVER	7	Male	FALSE	FALSE	FALSE	FALSE	FALSE	M	1	non-black
158	OUTPATIENT	Low	Final result	0.49	4510-11-23	4510-11-23	Yes	CREATININE	0.49	0.25	4510-01-24	0	NA	NA	Inf	35	4510-01-24	7	1	1	2	2	TRUE	239	10	12	NA	0.27	0	0	0	0	0.0220611	1.00096	4510-01-17	Inf	FALSE	NOT Hispanic or Latino	NEVER	7	Male	FALSE	FALSE	FALSE	FALSE	FALSE	M	1	non-black
159	OUTPATIENT	Low	Final result	0.53	4510-11-27	4510-11-27	Yes	CREATININE	0.53	0.25	4510-01-24	0	NA	NA	Inf	35	4510-01-24	7	1	1	2	2	TRUE	239	10	12	NA	0.27	0	0	0	0	0.0220611	1.00096	4510-01-17	Inf	FALSE	NOT Hispanic or Latino	NEVER	7	Male	FALSE	FALSE	FALSE	FALSE	FALSE	M	1	non-black
160	OUTPATIENT	Low	Final result	0.39	4510-11-28	4510-11-28	Yes	CREATININE	0.39	0.25	4510-01-24	0	NA	NA	Inf	35	4510-01-24	7	1	1	2	2	TRUE	239	10	12	NA	0.27	0	0	0	0	0.0220611	1.00096	4510-01-17	Inf	FALSE	NOT Hispanic or Latino	NEVER	7	Male	FALSE	FALSE	FALSE	FALSE	FALSE	M	1	non-black
161	OUTPATIENT	Low	Final result	0.51	4510-07-02	4510-07-02	Yes	CREATININE	0.51	0.25	4510-01-24	0	NA	NA	Inf	35	4510-01-24	7	1	1	2	2	TRUE	239	10	12	NA	0.27	0	0	0	0	0.0220611	1.00096	4510-01-17	Inf	FALSE	NOT Hispanic or Latino	NEVER	7	Male	FALSE	FALSE	FALSE	FALSE	FALSE	M	1	non-black
162	OUTPATIENT	Low	Final result	0.49	4510-07-01	4510-07-01	Yes	CREATININE	0.49	0.25	4510-01-24	0	NA	NA	Inf	35	4510-01-24	7	1	1	2	2	TRUE	239	10	12	NA	0.27	0	0	0	0	0.0220611	1.00096	4510-01-17	Inf	FALSE	NOT Hispanic or Latino	NEVER	7	Male	FALSE	FALSE	FALSE	FALSE	FALSE	M	1	non-black
163	OUTPATIENT	Low	Final result	0.62	4510-08-15	4510-08-15	Yes	CREATININE	0.62	0.25	4510-01-24	0	NA	NA	Inf	35	4510-01-24	7	1	1	2	2	TRUE	239	10	12	NA	0.27	0	0	0	0	0.0220611	1.00096	4510-01-17	Inf	FALSE	NOT Hispanic or Latino	NEVER	7	Male	FALSE	FALSE	FALSE	FALSE	FALSE	M	1	non-black
164	OUTPATIENT	*Unspecified	Preliminary result	0.75	4510-07-29	4510-07-30	No	CREATININE	0.75	0.25	4510-01-24	0	NA	NA	Inf	35	4510-01-24	7	1	1	2	2	TRUE	239	10	12	NA	0.27	0	0	0	0	0.0220611	1.00096	4510-01-17	Inf	FALSE	NOT Hispanic or Latino	NEVER	7	Male	FALSE	FALSE	FALSE	FALSE	FALSE	M	1	non-black
165	OUTPATIENT	Low	Final result	0.31	4510-09-14	4510-09-14	Yes	CREATININE	0.31	0.25	4510-01-24	0	NA	NA	Inf	35	4510-01-24	7	1	1	2	2	TRUE	239	10	12	NA	0.27	0	0	0	0	0.0220611	1.00096	4510-01-17	Inf	FALSE	NOT Hispanic or Latino	NEVER	7	Male	FALSE	FALSE	FALSE	FALSE	FALSE	M	1	non-black
166	OUTPATIENT	Low	Final result	0.3	4510-09-07	4510-09-07	Yes	CREATININE	0.3	0.25	4510-01-24	0	NA	NA	Inf	35	4510-01-24	7	1	1	2	2	TRUE	239	10	12	NA	0.27	0	0	0	0	0.0220611	1.00096	4510-01-17	Inf	FALSE	NOT Hispanic or Latino	NEVER	7	Male	FALSE	FALSE	FALSE	FALSE	FALSE	M	1	non-black
167	OUTPATIENT	Low	Final result	0.29	4510-09-05	4510-09-05	Yes	CREATININE	0.29	0.25	4510-01-24	0	NA	NA	Inf	35	4510-01-24	7	1	1	2	2	TRUE	239	10	12	NA	0.27	0	0	0	0	0.0220611	1.00096	4510-01-17	Inf	FALSE	NOT Hispanic or Latino	NEVER	7	Male	FALSE	FALSE	FALSE	FALSE	FALSE	M	1	non-black
168	OUTPATIENT	Low	Final result	0.31	4510-09-01	4510-09-01	Yes	CREATININE	0.31	0.25	4510-01-24	0	NA	NA	Inf	35	4510-01-24	7	1	1	2	2	TRUE	239	10	12	NA	0.27	0	0	0	0	0.0220611	1.00096	4510-01-17	Inf	FALSE	NOT Hispanic or Latino	NEVER	7	Male	FALSE	FALSE	FALSE	FALSE	FALSE	M	1	non-black
169	OUTPATIENT	Low	Final result	0.28	4510-09-11	4510-09-11	Yes	CREATININE	0.28	0.25	4510-01-24	0	NA	NA	Inf	35	4510-01-24	7	1	1	2	2	TRUE	239	10	12	NA	0.27	0	0	0	0	0.0220611	1.00096	4510-01-17	Inf	FALSE	NOT Hispanic or Latino	NEVER	7	Male	FALSE	FALSE	FALSE	FALSE	FALSE	M	1	non-black
170	OUTPATIENT	Low	Final result	0.35	4510-08-29	4510-08-29	Yes	CREATININE	0.35	0.25	4510-01-24	0	NA	NA	Inf	35	4510-01-24	7	1	1	2	2	TRUE	239	10	12	NA	0.27	0	0	0	0	0.0220611	1.00096	4510-01-17	Inf	FALSE	NOT Hispanic or Latino	NEVER	7	Male	FALSE	FALSE	FALSE	FALSE	FALSE	M	1	non-black
171	OUTPATIENT	Low	Final result	0.31	4510-08-28	4510-08-28	Yes	CREATININE	0.31	0.25	4510-01-24	0	NA	NA	Inf	35	4510-01-24	7	1	1	2	2	TRUE	239	10	12	NA	0.27	0	0	0	0	0.0220611	1.00096	4510-01-17	Inf	FALSE	NOT Hispanic or Latino	NEVER	7	Male	FALSE	FALSE	FALSE	FALSE	FALSE	M	1	non-black
172	OUTPATIENT	Low	Final result	0.22	4510-08-30	4510-08-30	Yes	CREATININE	0.22	0.25	4510-01-24	0	NA	NA	Inf	35	4510-01-24	7	1	1	2	2	TRUE	239	10	12	NA	0.27	0	0	0	0	0.0220611	1.00096	4510-01-17	Inf	FALSE	NOT Hispanic or Latino	NEVER	7	Male	FALSE	FALSE	FALSE	FALSE	FALSE	M	1	non-black
173	OUTPATIENT	Low	Final result	0.29	4510-08-24	4510-08-24	Yes	CREATININE	0.29	0.25	4510-01-24	0	NA	NA	Inf	35	4510-01-24	7	1	1	2	2	TRUE	239	10	12	NA	0.27	0	0	0	0	0.0220611	1.00096	4510-01-17	Inf	FALSE	NOT Hispanic or Latino	NEVER	7	Male	FALSE	FALSE	FALSE	FALSE	FALSE	M	1	non-black
174	OUTPATIENT	Low	Final result	0.35	4510-08-26	4510-08-26	Yes	CREATININE	0.35	0.25	4510-01-24	0	NA	NA	Inf	35	4510-01-24	7	1	1	2	2	TRUE	239	10	12	NA	0.27	0	0	0	0	0.0220611	1.00096	4510-01-17	Inf	FALSE	NOT Hispanic or Latino	NEVER	7	Male	FALSE	FALSE	FALSE	FALSE	FALSE	M	1	non-black
175	OUTPATIENT	Low	Final result	0.27	4510-09-06	4510-09-06	Yes	CREATININE	0.27	0.25	4510-01-24	0	NA	NA	Inf	35	4510-01-24	7	1	1	2	2	TRUE	239	10	12	NA	0.27	0	0	0	0	0.0220611	1.00096	4510-01-17	Inf	FALSE	NOT Hispanic or Latino	NEVER	7	Male	FALSE	FALSE	FALSE	FALSE	FALSE	M	1	non-black
176	OUTPATIENT	Low	Final result	0.49	4510-08-01	4510-08-01	Yes	CREATININE	0.49	0.25	4510-01-24	0	NA	NA	Inf	35	4510-01-24	7	1	1	2	2	TRUE	239	10	12	NA	0.27	0	0	0	0	0.0220611	1.00096	4510-01-17	Inf	FALSE	NOT Hispanic or Latino	NEVER	7	Male	FALSE	FALSE	FALSE	FALSE	FALSE	M	1	non-black
177	OUTPATIENT	Low	Final result	0.41	4510-08-03	4510-08-03	Yes	CREATININE	0.41	0.25	4510-01-24	0	NA	NA	Inf	35	4510-01-24	7	1	1	2	2	TRUE	239	10	12	NA	0.27	0	0	0	0	0.0220611	1.00096	4510-01-17	Inf	FALSE	NOT Hispanic or Latino	NEVER	7	Male	FALSE	FALSE	FALSE	FALSE	FALSE	M	1	non-black
178	OUTPATIENT	Low	Final result	0.46	4510-08-16	4510-08-16	Yes	CREATININE	0.46	0.25	4510-01-24	0	NA	NA	Inf	35	4510-01-24	7	1	1	2	2	TRUE	239	10	12	NA	0.27	0	0	0	0	0.0220611	1.00096	4510-01-17	Inf	FALSE	NOT Hispanic or Latino	NEVER	7	Male	FALSE	FALSE	FALSE	FALSE	FALSE	M	1	non-black
179	OUTPATIENT	Low	Final result	0.28	4510-09-03	4510-09-03	Yes	CREATININE	0.28	0.25	4510-01-24	0	NA	NA	Inf	35	4510-01-24	7	1	1	2	2	TRUE	239	10	12	NA	0.27	0	0	0	0	0.0220611	1.00096	4510-01-17	Inf	FALSE	NOT Hispanic or Latino	NEVER	7	Male	FALSE	FALSE	FALSE	FALSE	FALSE	M	1	non-black
180	OUTPATIENT	Low	Final result	0.3	4510-09-09	4510-09-09	Yes	CREATININE	0.3	0.25	4510-01-24	0	NA	NA	Inf	35	4510-01-24	7	1	1	2	2	TRUE	239	10	12	NA	0.27	0	0	0	0	0.0220611	1.00096	4510-01-17	Inf	FALSE	NOT Hispanic or Latino	NEVER	7	Male	FALSE	FALSE	FALSE	FALSE	FALSE	M	1	non-black
181	OUTPATIENT	Low	Final result	0.32	4510-08-27	4510-08-27	Yes	CREATININE	0.32	0.25	4510-01-24	0	NA	NA	Inf	35	4510-01-24	7	1	1	2	2	TRUE	239	10	12	NA	0.27	0	0	0	0	0.0220611	1.00096	4510-01-17	Inf	FALSE	NOT Hispanic or Latino	NEVER	7	Male	FALSE	FALSE	FALSE	FALSE	FALSE	M	1	non-black
182	OUTPATIENT	Low	Final result	0.42	4510-08-09	4510-08-09	Yes	CREATININE	0.42	0.25	4510-01-24	0	NA	NA	Inf	35	4510-01-24	7	1	1	2	2	TRUE	239	10	12	NA	0.27	0	0	0	0	0.0220611	1.00096	4510-01-17	Inf	FALSE	NOT Hispanic or Latino	NEVER	7	Male	FALSE	FALSE	FALSE	FALSE	FALSE	M	1	non-black
183	OUTPATIENT	Low	Final result	0.45	4510-08-02	4510-08-02	Yes	CREATININE	0.45	0.25	4510-01-24	0	NA	NA	Inf	35	4510-01-24	7	1	1	2	2	TRUE	239	10	12	NA	0.27	0	0	0	0	0.0220611	1.00096	4510-01-17	Inf	FALSE	NOT Hispanic or Latino	NEVER	7	Male	FALSE	FALSE	FALSE	FALSE	FALSE	M	1	non-black
184	OUTPATIENT	Low	Final result	0.48	4510-08-16	4510-08-16	Yes	CREATININE	0.48	0.25	4510-01-24	0	NA	NA	Inf	35	4510-01-24	7	1	1	2	2	TRUE	239	10	12	NA	0.27	0	0	0	0	0.0220611	1.00096	4510-01-17	Inf	FALSE	NOT Hispanic or Latino	NEVER	7	Male	FALSE	FALSE	FALSE	FALSE	FALSE	M	1	non-black
185	OUTPATIENT	*Unspecified	Final result	1.07	4510-08-10	4510-08-10	Yes	CREATININE	1.07	0.25	4510-01-24	0	NA	NA	Inf	35	4510-01-24	7	1	1	2	2	TRUE	239	10	12	NA	0.27	0	0	0	0	0.0220611	1.00096	4510-01-17	Inf	FALSE	NOT Hispanic or Latino	NEVER	7	Male	FALSE	FALSE	FALSE	FALSE	FALSE	M	1	non-black
186	OUTPATIENT	High	Final result	1.65	4510-08-12	4510-08-12	Yes	CREATININE	1.65	0.25	4510-01-24	0	NA	NA	Inf	35	4510-01-24	7	1	1	2	2	TRUE	239	10	12	NA	0.27	0	0	0	0	0.0220611	1.00096	4510-01-17	Inf	FALSE	NOT Hispanic or Latino	NEVER	7	Male	FALSE	FALSE	FALSE	FALSE	FALSE	M	1	non-black
187	OUTPATIENT	High	Final result	1.43	4510-08-10	4510-08-10	Yes	CREATININE	1.43	0.25	4510-01-24	0	NA	NA	Inf	35	4510-01-24	7	1	1	2	2	TRUE	239	10	12	NA	0.27	0	0	0	0	0.0220611	1.00096	4510-01-17	Inf	FALSE	NOT Hispanic or Latino	NEVER	7	Male	FALSE	FALSE	FALSE	FALSE	FALSE	M	1	non-black
188	OUTPATIENT	Low	Final result	0.3	4510-09-16	4510-09-16	Yes	CREATININE	0.3	0.25	4510-01-24	0	NA	NA	Inf	35	4510-01-24	7	1	1	2	2	TRUE	239	10	12	NA	0.27	0	0	0	0	0.0220611	1.00096	4510-01-17	Inf	FALSE	NOT Hispanic or Latino	NEVER	7	Male	FALSE	FALSE	FALSE	FALSE	FALSE	M	1	non-black
189	OUTPATIENT	Low	Final result	0.31	4510-09-15	4510-09-15	Yes	CREATININE	0.31	0.25	4510-01-24	0	NA	NA	Inf	35	4510-01-24	7	1	1	2	2	TRUE	239	10	12	NA	0.27	0	0	0	0	0.0220611	1.00096	4510-01-17	Inf	FALSE	NOT Hispanic or Latino	NEVER	7	Male	FALSE	FALSE	FALSE	FALSE	FALSE	M	1	non-black
190	OUTPATIENT	Low	Final result	0.3	4510-08-22	4510-08-22	Yes	CREATININE	0.3	0.25	4510-01-24	0	NA	NA	Inf	35	4510-01-24	7	1	1	2	2	TRUE	239	10	12	NA	0.27	0	0	0	0	0.0220611	1.00096	4510-01-17	Inf	FALSE	NOT Hispanic or Latino	NEVER	7	Male	FALSE	FALSE	FALSE	FALSE	FALSE	M	1	non-black
191	OUTPATIENT	*Unspecified	Final result	1.01	4510-08-15	4510-08-15	Yes	CREATININE	1.01	0.25	4510-01-24	0	NA	NA	Inf	35	4510-01-24	7	1	1	2	2	TRUE	239	10	12	NA	0.27	0	0	0	0	0.0220611	1.00096	4510-01-17	Inf	FALSE	NOT Hispanic or Latino	NEVER	7	Male	FALSE	FALSE	FALSE	FALSE	FALSE	M	1	non-black
192	OUTPATIENT	*Unspecified	Final result	1.16	4510-08-10	4510-08-10	Yes	CREATININE	1.16	0.25	4510-01-24	0	NA	NA	Inf	35	4510-01-24	7	1	1	2	2	TRUE	239	10	12	NA	0.27	0	0	0	0	0.0220611	1.00096	4510-01-17	Inf	FALSE	NOT Hispanic or Latino	NEVER	7	Male	FALSE	FALSE	FALSE	FALSE	FALSE	M	1	non-black
193	OUTPATIENT	Low	Final result	0.33	4510-09-12	4510-09-12	Yes	CREATININE	0.33	0.25	4510-01-24	0	NA	NA	Inf	35	4510-01-24	7	1	1	2	2	TRUE	239	10	12	NA	0.27	0	0	0	0	0.0220611	1.00096	4510-01-17	Inf	FALSE	NOT Hispanic or Latino	NEVER	7	Male	FALSE	FALSE	FALSE	FALSE	FALSE	M	1	non-black
194	OUTPATIENT	Low	Final result	0.24	4510-09-08	4510-09-08	Yes	CREATININE	0.24	0.25	4510-01-24	0	NA	NA	Inf	35	4510-01-24	7	1	1	2	2	TRUE	239	10	12	NA	0.27	0	0	0	0	0.0220611	1.00096	4510-01-17	Inf	FALSE	NOT Hispanic or Latino	NEVER	7	Male	FALSE	FALSE	FALSE	FALSE	FALSE	M	1	non-black
195	OUTPATIENT	Low	Final result	0.49	4510-08-01	4510-08-01	Yes	CREATININE	0.49	0.25	4510-01-24	0	NA	NA	Inf	35	4510-01-24	7	1	1	2	2	TRUE	239	10	12	NA	0.27	0	0	0	0	0.0220611	1.00096	4510-01-17	Inf	FALSE	NOT Hispanic or Latino	NEVER	7	Male	FALSE	FALSE	FALSE	FALSE	FALSE	M	1	non-black
196	OUTPATIENT	*Unspecified	Final result	0.92	4510-08-09	4510-08-09	Yes	CREATININE	0.92	0.25	4510-01-24	0	NA	NA	Inf	35	4510-01-24	7	1	1	2	2	TRUE	239	10	12	NA	0.27	0	0	0	0	0.0220611	1.00096	4510-01-17	Inf	FALSE	NOT Hispanic or Latino	NEVER	7	Male	FALSE	FALSE	FALSE	FALSE	FALSE	M	1	non-black
197	OUTPATIENT	Low	Final result	0.38	4510-08-23	4510-08-23	Yes	CREATININE	0.38	0.25	4510-01-24	0	NA	NA	Inf	35	4510-01-24	7	1	1	2	2	TRUE	239	10	12	NA	0.27	0	0	0	0	0.0220611	1.00096	4510-01-17	Inf	FALSE	NOT Hispanic or Latino	NEVER	7	Male	FALSE	FALSE	FALSE	FALSE	FALSE	M	1	non-black
198	OUTPATIENT	Low	Final result	0.35	4510-08-25	4510-08-25	Yes	CREATININE	0.35	0.25	4510-01-24	0	NA	NA	Inf	35	4510-01-24	7	1	1	2	2	TRUE	239	10	12	NA	0.27	0	0	0	0	0.0220611	1.00096	4510-01-17	Inf	FALSE	NOT Hispanic or Latino	NEVER	7	Male	FALSE	FALSE	FALSE	FALSE	FALSE	M	1	non-black
199	OUTPATIENT	Low	Final result	0.31	4510-09-04	4510-09-04	Yes	CREATININE	0.31	0.25	4510-01-24	0	NA	NA	Inf	35	4510-01-24	7	1	1	2	2	TRUE	239	10	12	NA	0.27	0	0	0	0	0.0220611	1.00096	4510-01-17	Inf	FALSE	NOT Hispanic or Latino	NEVER	7	Male	FALSE	FALSE	FALSE	FALSE	FALSE	M	1	non-black
200	OUTPATIENT	Low	Final result	0.28	4510-08-31	4510-08-31	Yes	CREATININE	0.28	0.25	4510-01-24	0	NA	NA	Inf	35	4510-01-24	7	1	1	2	2	TRUE	239	10	12	NA	0.27	0	0	0	0	0.0220611	1.00096	4510-01-17	Inf	FALSE	NOT Hispanic or Latino	NEVER	7	Male	FALSE	FALSE	FALSE	FALSE	FALSE	M	1	non-black
201	OUTPATIENT	Low	Final result	0.42	4510-08-04	4510-08-04	Yes	CREATININE	0.42	0.25	4510-01-24	0	NA	NA	Inf	35	4510-01-24	7	1	1	2	2	TRUE	239	10	12	NA	0.27	0	0	0	0	0.0220611	1.00096	4510-01-17	Inf	FALSE	NOT Hispanic or Latino	NEVER	7	Male	FALSE	FALSE	FALSE	FALSE	FALSE	M	1	non-black
202	OUTPATIENT	High	Final result	1.34	4510-08-14	4510-08-14	Yes	CREATININE	1.34	0.25	4510-01-24	0	NA	NA	Inf	35	4510-01-24	7	1	1	2	2	TRUE	239	10	12	NA	0.27	0	0	0	0	0.0220611	1.00096	4510-01-17	Inf	FALSE	NOT Hispanic or Latino	NEVER	7	Male	FALSE	FALSE	FALSE	FALSE	FALSE	M	1	non-black
203	OUTPATIENT	High	Final result	1.51	4510-08-11	4510-08-11	Yes	CREATININE	1.51	0.25	4510-01-24	0	NA	NA	Inf	35	4510-01-24	7	1	1	2	2	TRUE	239	10	12	NA	0.27	0	0	0	0	0.0220611	1.00096	4510-01-17	Inf	FALSE	NOT Hispanic or Latino	NEVER	7	Male	FALSE	FALSE	FALSE	FALSE	FALSE	M	1	non-black
204	OUTPATIENT	Low	Final result	0.41	4510-08-05	4510-08-05	Yes	CREATININE	0.41	0.25	4510-01-24	0	NA	NA	Inf	35	4510-01-24	7	1	1	2	2	TRUE	239	10	12	NA	0.27	0	0	0	0	0.0220611	1.00096	4510-01-17	Inf	FALSE	NOT Hispanic or Latino	NEVER	7	Male	FALSE	FALSE	FALSE	FALSE	FALSE	M	1	non-black
205	OUTPATIENT	Low	Final result	0.3	4510-09-17	4510-09-17	Yes	CREATININE	0.3	0.25	4510-01-24	0	NA	NA	Inf	35	4510-01-24	7	1	1	2	2	TRUE	239	10	12	NA	0.27	0	0	0	0	0.0220611	1.00096	4510-01-17	Inf	FALSE	NOT Hispanic or Latino	NEVER	7	Male	FALSE	FALSE	FALSE	FALSE	FALSE	M	1	non-black
206	OUTPATIENT	Low	Final result	0.31	4510-09-13	4510-09-13	Yes	CREATININE	0.31	0.25	4510-01-24	0	NA	NA	Inf	35	4510-01-24	7	1	1	2	2	TRUE	239	10	12	NA	0.27	0	0	0	0	0.0220611	1.00096	4510-01-17	Inf	FALSE	NOT Hispanic or Latino	NEVER	7	Male	FALSE	FALSE	FALSE	FALSE	FALSE	M	1	non-black
207	OUTPATIENT	Low	Final result	0.32	4510-09-10	4510-09-10	Yes	CREATININE	0.32	0.25	4510-01-24	0	NA	NA	Inf	35	4510-01-24	7	1	1	2	2	TRUE	239	10	12	NA	0.27	0	0	0	0	0.0220611	1.00096	4510-01-17	Inf	FALSE	NOT Hispanic or Latino	NEVER	7	Male	FALSE	FALSE	FALSE	FALSE	FALSE	M	1	non-black
208	OUTPATIENT	High	Final result	1.58	4510-08-11	4510-08-11	Yes	CREATININE	1.58	0.25	4510-01-24	0	NA	NA	Inf	35	4510-01-24	7	1	1	2	2	TRUE	239	10	12	NA	0.27	0	0	0	0	0.0220611	1.00096	4510-01-17	Inf	FALSE	NOT Hispanic or Latino	NEVER	7	Male	FALSE	FALSE	FALSE	FALSE	FALSE	M	1	non-black
209	OUTPATIENT	High	Final result	1.87	4510-08-13	4510-08-13	Yes	CREATININE	1.87	0.25	4510-01-24	0	NA	NA	Inf	35	4510-01-24	7	1	1	2	2	TRUE	239	10	12	NA	0.27	0	0	0	0	0.0220611	1.00096	4510-01-17	Inf	FALSE	NOT Hispanic or Latino	NEVER	7	Male	FALSE	FALSE	FALSE	FALSE	FALSE	M	1	non-black
210	OUTPATIENT	High	Final result	1.73	4510-08-12	4510-08-12	Yes	CREATININE	1.73	0.25	4510-01-24	0	NA	NA	Inf	35	4510-01-24	7	1	1	2	2	TRUE	239	10	12	NA	0.27	0	0	0	0	0.0220611	1.00096	4510-01-17	Inf	FALSE	NOT Hispanic or Latino	NEVER	7	Male	FALSE	FALSE	FALSE	FALSE	FALSE	M	1	non-black
211	OUTPATIENT	Low	Final result	0.36	4510-08-08	4510-08-08	Yes	CREATININE	0.36	0.25	4510-01-24	0	NA	NA	Inf	35	4510-01-24	7	1	1	2	2	TRUE	239	10	12	NA	0.27	0	0	0	0	0.0220611	1.00096	4510-01-17	Inf	FALSE	NOT Hispanic or Latino	NEVER	7	Male	FALSE	FALSE	FALSE	FALSE	FALSE	M	1	non-black
212	OUTPATIENT	Low	Final result	0.25	4510-08-21	4510-08-21	Yes	CREATININE	0.25	0.25	4510-01-24	0	NA	NA	Inf	35	4510-01-24	7	1	1	2	2	TRUE	239	10	12	NA	0.27	0	0	0	0	0.0220611	1.00096	4510-01-17	Inf	FALSE	NOT Hispanic or Latino	NEVER	7	Male	FALSE	FALSE	FALSE	FALSE	FALSE	M	1	non-black
213	OUTPATIENT	Low	Final result	0.3	4510-08-18	4510-08-18	Yes	CREATININE	0.3	0.25	4510-01-24	0	NA	NA	Inf	35	4510-01-24	7	1	1	2	2	TRUE	239	10	12	NA	0.27	0	0	0	0	0.0220611	1.00096	4510-01-17	Inf	FALSE	NOT Hispanic or Latino	NEVER	7	Male	FALSE	FALSE	FALSE	FALSE	FALSE	M	1	non-black
214	OUTPATIENT	Low	Final result	0.43	4510-08-17	4510-08-17	Yes	CREATININE	0.43	0.25	4510-01-24	0	NA	NA	Inf	35	4510-01-24	7	1	1	2	2	TRUE	239	10	12	NA	0.27	0	0	0	0	0.0220611	1.00096	4510-01-17	Inf	FALSE	NOT Hispanic or Latino	NEVER	7	Male	FALSE	FALSE	FALSE	FALSE	FALSE	M	1	non-black
215	OUTPATIENT	Low	Final result	0.28	4510-08-19	4510-08-19	Yes	CREATININE	0.28	0.25	4510-01-24	0	NA	NA	Inf	35	4510-01-24	7	1	1	2	2	TRUE	239	10	12	NA	0.27	0	0	0	0	0.0220611	1.00096	4510-01-17	Inf	FALSE	NOT Hispanic or Latino	NEVER	7	Male	FALSE	FALSE	FALSE	FALSE	FALSE	M	1	non-black
216	OUTPATIENT	High	Final result	1.9	4510-08-13	4510-08-13	Yes	CREATININE	1.9	0.25	4510-01-24	0	NA	NA	Inf	35	4510-01-24	7	1	1	2	2	TRUE	239	10	12	NA	0.27	0	0	0	0	0.0220611	1.00096	4510-01-17	Inf	FALSE	NOT Hispanic or Latino	NEVER	7	Male	FALSE	FALSE	FALSE	FALSE	FALSE	M	1	non-black
217	OUTPATIENT	Low	Final result	0.37	4510-08-07	4510-08-07	Yes	CREATININE	0.37	0.25	4510-01-24	0	NA	NA	Inf	35	4510-01-24	7	1	1	2	2	TRUE	239	10	12	NA	0.27	0	0	0	0	0.0220611	1.00096	4510-01-17	Inf	FALSE	NOT Hispanic or Latino	NEVER	7	Male	FALSE	FALSE	FALSE	FALSE	FALSE	M	1	non-black
218	OUTPATIENT	Low	Final result	0.42	4510-08-06	4510-08-06	Yes	CREATININE	0.42	0.25	4510-01-24	0	NA	NA	Inf	35	4510-01-24	7	1	1	2	2	TRUE	239	10	12	NA	0.27	0	0	0	0	0.0220611	1.00096	4510-01-17	Inf	FALSE	NOT Hispanic or Latino	NEVER	7	Male	FALSE	FALSE	FALSE	FALSE	FALSE	M	1	non-black
219	OUTPATIENT	Low	Final result	0.29	4510-08-20	4510-08-20	Yes	CREATININE	0.29	0.25	4510-01-24	0	NA	NA	Inf	35	4510-01-24	7	1	1	2	2	TRUE	239	10	12	NA	0.27	0	0	0	0	0.0220611	1.00096	4510-01-17	Inf	FALSE	NOT Hispanic or Latino	NEVER	7	Male	FALSE	FALSE	FALSE	FALSE	FALSE	M	1	non-black
220	OUTPATIENT	High	Final result	1.73	4510-08-14	4510-08-14	Yes	CREATININE	1.73	0.25	4510-01-24	0	NA	NA	Inf	35	4510-01-24	7	1	1	2	2	TRUE	239	10	12	NA	0.27	0	0	0	0	0.0220611	1.00096	4510-01-17	Inf	FALSE	NOT Hispanic or Latino	NEVER	7	Male	FALSE	FALSE	FALSE	FALSE	FALSE	M	1	non-black
221	OUTPATIENT	Low	Final result	0.6	4510-10-10	4510-10-10	Yes	CREATININE	0.6	0.25	4510-01-24	0	NA	NA	Inf	35	4510-01-24	7	1	1	2	2	TRUE	239	10	12	NA	0.27	0	0	0	0	0.0220611	1.00096	4510-01-17	Inf	FALSE	NOT Hispanic or Latino	NEVER	7	Male	FALSE	FALSE	FALSE	FALSE	FALSE	M	1	non-black
222	OUTPATIENT	Low	Final result	0.42	4510-10-12	4510-10-12	Yes	CREATININE	0.42	0.25	4510-01-24	0	NA	NA	Inf	35	4510-01-24	7	1	1	2	2	TRUE	239	10	12	NA	0.27	0	0	0	0	0.0220611	1.00096	4510-01-17	Inf	FALSE	NOT Hispanic or Latino	NEVER	7	Male	FALSE	FALSE	FALSE	FALSE	FALSE	M	1	non-black
223	OUTPATIENT	Low	Final result	0.4	4510-10-11	4510-10-11	Yes	CREATININE	0.4	0.25	4510-01-24	0	NA	NA	Inf	35	4510-01-24	7	1	1	2	2	TRUE	239	10	12	NA	0.27	0	0	0	0	0.0220611	1.00096	4510-01-17	Inf	FALSE	NOT Hispanic or Latino	NEVER	7	Male	FALSE	FALSE	FALSE	FALSE	FALSE	M	1	non-black
224	OUTPATIENT	Low	Final result	0.56	4510-10-09	4510-10-09	Yes	CREATININE	0.56	0.25	4510-01-24	0	NA	NA	Inf	35	4510-01-24	7	1	1	2	2	TRUE	239	10	12	NA	0.27	0	0	0	0	0.0220611	1.00096	4510-01-17	Inf	FALSE	NOT Hispanic or Latino	NEVER	7	Male	FALSE	FALSE	FALSE	FALSE	FALSE	M	1	non-black
225	OUTPATIENT	Low	Final result	0.5	4510-11-22	4510-11-22	Yes	CREATININE	0.5	0.25	4510-01-24	0	NA	NA	Inf	35	4510-01-24	7	1	1	2	2	TRUE	239	10	12	NA	0.27	0	0	0	0	0.0220611	1.00096	4510-01-17	Inf	FALSE	NOT Hispanic or Latino	NEVER	7	Male	FALSE	FALSE	FALSE	FALSE	FALSE	M	1	non-black
226	OUTPATIENT	Low	Final result	0.41	4510-11-30	4510-11-30	Yes	CREATININE	0.41	0.25	4510-01-24	0	NA	NA	Inf	35	4510-01-24	7	1	1	2	2	TRUE	239	10	12	NA	0.27	0	0	0	0	0.0220611	1.00096	4510-01-17	Inf	FALSE	NOT Hispanic or Latino	NEVER	7	Male	FALSE	FALSE	FALSE	FALSE	FALSE	M	1	non-black
227	OUTPATIENT	Low	Final result	0.49	4510-11-26	4510-11-26	Yes	CREATININE	0.49	0.25	4510-01-24	0	NA	NA	Inf	35	4510-01-24	7	1	1	2	2	TRUE	239	10	12	NA	0.27	0	0	0	0	0.0220611	1.00096	4510-01-17	Inf	FALSE	NOT Hispanic or Latino	NEVER	7	Male	FALSE	FALSE	FALSE	FALSE	FALSE	M	1	non-black
228	OUTPATIENT	Low	Final result	0.53	4510-11-21	4510-11-21	Yes	CREATININE	0.53	0.25	4510-01-24	0	NA	NA	Inf	35	4510-01-24	7	1	1	2	2	TRUE	239	10	12	NA	0.27	0	0	0	0	0.0220611	1.00096	4510-01-17	Inf	FALSE	NOT Hispanic or Latino	NEVER	7	Male	FALSE	FALSE	FALSE	FALSE	FALSE	M	1	non-black
229	OUTPATIENT	Low	Final result	0.58	4510-11-24	4510-11-24	Yes	CREATININE	0.58	0.25	4510-01-24	0	NA	NA	Inf	35	4510-01-24	7	1	1	2	2	TRUE	239	10	12	NA	0.27	0	0	0	0	0.0220611	1.00096	4510-01-17	Inf	FALSE	NOT Hispanic or Latino	NEVER	7	Male	FALSE	FALSE	FALSE	FALSE	FALSE	M	1	non-black
230	OUTPATIENT	Low	Final result	0.45	4510-11-25	4510-11-25	Yes	CREATININE	0.45	0.25	4510-01-24	0	NA	NA	Inf	35	4510-01-24	7	1	1	2	2	TRUE	239	10	12	NA	0.27	0	0	0	0	0.0220611	1.00096	4510-01-17	Inf	FALSE	NOT Hispanic or Latino	NEVER	7	Male	FALSE	FALSE	FALSE	FALSE	FALSE	M	1	non-black
231	OUTPATIENT	Low	Final result	0.38	4510-02-02	4510-02-02	Yes	CREATININE	0.38	1.38101	4510-01-24	0	NA	NA	Inf	11	4510-01-24	1	#NAME?	0	0	0	TRUE	193	NA	39	NA	0.52	0	0	0	0	0	1	NA	Inf	FALSE	NOT Hispanic or Latino	NEVER	14	Male	FALSE	FALSE	FALSE	FALSE	FALSE	M	1	non-black
232	OUTPATIENT	Low	Final result	0.55	4510-05-18	4510-05-18	Yes	CREATININE	0.55	1.38101	4510-01-24	0	NA	NA	Inf	11	4510-01-24	1	#NAME?	0	0	0	TRUE	193	NA	39	NA	0.52	0	0	0	0	0	1	NA	Inf	FALSE	NOT Hispanic or Latino	NEVER	14	Male	FALSE	FALSE	FALSE	FALSE	FALSE	M	1	non-black
233	OUTPATIENT	Low	Final result	0.54	4510-01-25	4510-01-25	Yes	CREATININE	0.54	1.38101	4510-01-24	0	NA	NA	Inf	11	4510-01-24	1	#NAME?	0	0	0	TRUE	193	NA	39	NA	0.52	0	0	0	0	0	1	NA	Inf	FALSE	NOT Hispanic or Latino	NEVER	14	Male	FALSE	FALSE	FALSE	FALSE	FALSE	M	1	non-black
234	OUTPATIENT	Low	Final result	0.45	4510-01-26	4510-01-26	Yes	CREATININE	0.45	1.38101	4510-01-24	0	NA	NA	Inf	11	4510-01-24	1	#NAME?	0	0	0	TRUE	193	NA	39	NA	0.52	0	0	0	0	0	1	NA	Inf	FALSE	NOT Hispanic or Latino	NEVER	14	Male	FALSE	FALSE	FALSE	FALSE	FALSE	M	1	non-black
235	OUTPATIENT	Low	Final result	0.52	4510-01-24	4510-01-24	Yes	CREATININE	0.52	1.38101	4510-01-24	0	NA	NA	Inf	11	4510-01-24	1	#NAME?	0	0	0	TRUE	193	NA	39	NA	0.52	0	0	0	0	0	1	NA	Inf	FALSE	NOT Hispanic or Latino	NEVER	14	Male	FALSE	FALSE	FALSE	FALSE	FALSE	M	1	non-black
236	OUTPATIENT	Low	Final result	0.39	4510-02-01	4510-02-01	Yes	CREATININE	0.39	1.38101	4510-01-24	0	NA	NA	Inf	11	4510-01-24	1	#NAME?	0	0	0	TRUE	193	NA	39	NA	0.52	0	0	0	0	0	1	NA	Inf	FALSE	NOT Hispanic or Latino	NEVER	14	Male	FALSE	FALSE	FALSE	FALSE	FALSE	M	1	non-black
237	OUTPATIENT	Low	Final result	0.42	4510-01-31	4510-01-31	Yes	CREATININE	0.42	1.38101	4510-01-24	0	NA	NA	Inf	11	4510-01-24	1	#NAME?	0	0	0	TRUE	193	NA	39	NA	0.52	0	0	0	0	0	1	NA	Inf	FALSE	NOT Hispanic or Latino	NEVER	14	Male	FALSE	FALSE	FALSE	FALSE	FALSE	M	1	non-black
238	OUTPATIENT	Low	Final result	0.53	4510-01-27	4510-01-27	Yes	CREATININE	0.53	1.38101	4510-01-24	0	NA	NA	Inf	11	4510-01-24	1	#NAME?	0	0	0	TRUE	193	NA	39	NA	0.52	0	0	0	0	0	1	NA	Inf	FALSE	NOT Hispanic or Latino	NEVER	14	Male	FALSE	FALSE	FALSE	FALSE	FALSE	M	1	non-black
239	OUTPATIENT	Low	Final result	0.46	4510-01-28	4510-01-28	Yes	CREATININE	0.46	1.38101	4510-01-24	0	NA	NA	Inf	11	4510-01-24	1	#NAME?	0	0	0	TRUE	193	NA	39	NA	0.52	0	0	0	0	0	1	NA	Inf	FALSE	NOT Hispanic or Latino	NEVER	14	Male	FALSE	FALSE	FALSE	FALSE	FALSE	M	1	non-black
240	OUTPATIENT	Low	Final result	0.53	4510-01-29	4510-01-29	Yes	CREATININE	0.53	1.38101	4510-01-24	0	NA	NA	Inf	11	4510-01-24	1	#NAME?	0	0	0	TRUE	193	NA	39	NA	0.52	0	0	0	0	0	1	NA	Inf	FALSE	NOT Hispanic or Latino	NEVER	14	Male	FALSE	FALSE	FALSE	FALSE	FALSE	M	1	non-black
241	OUTPATIENT	Low	Final result	0.54	4510-01-25	4510-01-25	Yes	CREATININE	0.54	1.38101	4510-01-24	0	NA	NA	Inf	11	4510-01-24	1	#NAME?	0	0	0	TRUE	193	NA	39	NA	0.52	0	0	0	0	0	1	NA	Inf	FALSE	NOT Hispanic or Latino	NEVER	14	Male	FALSE	FALSE	FALSE	FALSE	FALSE	M	1	non-black
242	OUTPATIENT	Low	Final result	0.41	4510-01-30	4510-01-30	Yes	CREATININE	0.41	1.38101	4510-01-24	0	NA	NA	Inf	11	4510-01-24	1	#NAME?	0	0	0	TRUE	193	NA	39	NA	0.52	0	0	0	0	0	1	NA	Inf	FALSE	NOT Hispanic or Latino	NEVER	14	Male	FALSE	FALSE	FALSE	FALSE	FALSE	M	1	non-black
243	OUTPATIENT	Low	Final result	0.57	4510-04-15	4510-04-16	Yes	CREATININE	0.57	1.38101	4510-01-24	0	NA	NA	Inf	11	4510-01-24	1	#NAME?	0	0	0	TRUE	193	NA	39	NA	0.52	0	0	0	0	0	1	NA	Inf	FALSE	NOT Hispanic or Latino	NEVER	14	Male	FALSE	FALSE	FALSE	FALSE	FALSE	M	1	non-black
244	OUTPATIENT	Low	Final result	0.53	4510-08-09	4510-08-09	Yes	CREATININE	0.53	1.38101	4510-01-24	0	NA	NA	Inf	11	4510-01-24	1	#NAME?	0	0	0	TRUE	193	NA	39	NA	0.52	0	0	0	0	0	1	NA	Inf	FALSE	NOT Hispanic or Latino	NEVER	14	Male	FALSE	FALSE	FALSE	FALSE	FALSE	M	1	non-black
245	OUTPATIENT	Low	Final result	0.54	4510-06-15	4510-06-15	Yes	CREATININE	0.54	1.38101	4510-01-24	0	NA	NA	Inf	11	4510-01-24	1	#NAME?	0	0	0	TRUE	193	NA	39	NA	0.52	0	0	0	0	0	1	NA	Inf	FALSE	NOT Hispanic or Latino	NEVER	14	Male	FALSE	FALSE	FALSE	FALSE	FALSE	M	1	non-black
246	OUTPATIENT	Low	Final result	0.52	4510-07-13	4510-07-13	Yes	CREATININE	0.52	1.38101	4510-01-24	0	NA	NA	Inf	11	4510-01-24	1	#NAME?	0	0	0	TRUE	193	NA	39	NA	0.52	0	0	0	0	0	1	NA	Inf	FALSE	NOT Hispanic or Latino	NEVER	14	Male	FALSE	FALSE	FALSE	FALSE	FALSE	M	1	non-black
247	OUTPATIENT	Low	Final result	0.6	4511-07-19	4511-07-19	Yes	CREATININE	0.6	1.38101	4510-01-24	0	NA	NA	Inf	11	4510-01-24	1	#NAME?	0	0	0	TRUE	193	NA	39	NA	0.52	0	0	0	0	0	1	NA	Inf	FALSE	NOT Hispanic or Latino	NEVER	14	Male	FALSE	FALSE	FALSE	FALSE	FALSE	M	1	non-black
248	OUTPATIENT	Low	Final result	0.56	4511-05-24	4511-05-24	Yes	CREATININE	0.56	1.38101	4510-01-24	0	NA	NA	Inf	11	4510-01-24	1	#NAME?	0	0	0	TRUE	193	NA	39	NA	0.52	0	0	0	0	0	1	NA	Inf	FALSE	NOT Hispanic or Latino	NEVER	14	Male	FALSE	FALSE	FALSE	FALSE	FALSE	M	1	non-black
249	OUTPATIENT	Low	Final result	0.52	4510-09-06	4510-09-06	Yes	CREATININE	0.52	1.38101	4510-01-24	0	NA	NA	Inf	11	4510-01-24	1	#NAME?	0	0	0	TRUE	193	NA	39	NA	0.52	0	0	0	0	0	1	NA	Inf	FALSE	NOT Hispanic or Latino	NEVER	14	Male	FALSE	FALSE	FALSE	FALSE	FALSE	M	1	non-black
250	OUTPATIENT	Low	Final result	0.48	4510-02-18	4510-02-19	Yes	CREATININE	0.48	1.38101	4510-01-24	0	NA	NA	Inf	11	4510-01-24	1	#NAME?	0	0	0	TRUE	193	NA	39	NA	0.52	0	0	0	0	0	1	NA	Inf	FALSE	NOT Hispanic or Latino	NEVER	14	Male	FALSE	FALSE	FALSE	FALSE	FALSE	M	1	non-black
251	OUTPATIENT	Low	Final result	0.53	4510-12-14	4510-12-14	Yes	CREATININE	0.53	1.38101	4510-01-24	0	NA	NA	Inf	11	4510-01-24	1	#NAME?	0	0	0	TRUE	193	NA	39	NA	0.52	0	0	0	0	0	1	NA	Inf	FALSE	NOT Hispanic or Latino	NEVER	14	Male	FALSE	FALSE	FALSE	FALSE	FALSE	M	1	non-black
252	OUTPATIENT	Low	Final result	0.55	4511-02-28	4511-02-28	Yes	CREATININE	0.55	1.38101	4510-01-24	0	NA	NA	Inf	11	4510-01-24	1	#NAME?	0	0	0	TRUE	193	NA	39	NA	0.52	0	0	0	0	0	1	NA	Inf	FALSE	NOT Hispanic or Latino	NEVER	14	Male	FALSE	FALSE	FALSE	FALSE	FALSE	M	1	non-black
253	OUTPATIENT	Low	Final result	0.53	4510-11-09	4510-11-09	Yes	CREATININE	0.53	1.38101	4510-01-24	0	NA	NA	Inf	11	4510-01-24	1	#NAME?	0	0	0	TRUE	193	NA	39	NA	0.52	0	0	0	0	0	1	NA	Inf	FALSE	NOT Hispanic or Latino	NEVER	14	Male	FALSE	FALSE	FALSE	FALSE	FALSE	M	1	non-black
254	OUTPATIENT	Low	Final result	0.54	4510-10-05	4510-10-05	Yes	CREATININE	0.54	1.38101	4510-01-24	0	NA	NA	Inf	11	4510-01-24	1	#NAME?	0	0	0	TRUE	193	NA	39	NA	0.52	0	0	0	0	0	1	NA	Inf	FALSE	NOT Hispanic or Latino	NEVER	14	Male	FALSE	FALSE	FALSE	FALSE	FALSE	M	1	non-black
255	OUTPATIENT	Low	Final result	0.49	4511-01-18	4511-01-18	Yes	CREATININE	0.49	1.38101	4510-01-24	0	NA	NA	Inf	11	4510-01-24	1	#NAME?	0	0	0	TRUE	193	NA	39	NA	0.52	0	0	0	0	0	1	NA	Inf	FALSE	NOT Hispanic or Latino	NEVER	14	Male	FALSE	FALSE	FALSE	FALSE	FALSE	M	1	non-black
256	OUTPATIENT	Low	Preliminary result	0.49	4511-04-11	4511-04-11	No	CREATININE	0.49	1.38101	4510-01-24	0	NA	NA	Inf	11	4510-01-24	1	#NAME?	0	0	0	TRUE	193	NA	39	NA	0.52	0	0	0	0	0	1	NA	Inf	FALSE	NOT Hispanic or Latino	NEVER	14	Male	FALSE	FALSE	FALSE	FALSE	FALSE	M	1	non-black
257	OUTPATIENT	Low	Final result	0.46	4510-02-07	4510-02-07	Yes	CREATININE	0.46	1.11255	4510-02-06	0	NA	NA	Inf	6	4510-02-06	0	1	0	8	8	TRUE	42	18	0.5	0.4	0.96	0	0	0	0	0	1	NA	Inf	FALSE	Hispanic or Latino	NEVER	11	Female	FALSE	FALSE	FALSE	FALSE	FALSE	F	0.742	non-black
258	OUTPATIENT	*Unspecified	Final result	0.96	4510-02-06	4510-02-06	Yes	CREATININE	0.96	1.11255	4510-02-06	0	NA	NA	Inf	6	4510-02-06	0	1	0	8	8	TRUE	42	18	0.5	0.4	0.96	0	0	0	0	0	1	NA	Inf	FALSE	Hispanic or Latino	NEVER	11	Female	FALSE	FALSE	FALSE	FALSE	FALSE	F	0.742	non-black
259	OUTPATIENT	Low	Final result	0.43	4510-02-10	4510-02-10	Yes	CREATININE	0.43	1.11255	4510-02-06	0	NA	NA	Inf	6	4510-02-06	0	1	0	8	8	TRUE	42	18	0.5	0.4	0.96	0	0	0	0	0	1	NA	Inf	FALSE	Hispanic or Latino	NEVER	11	Female	FALSE	FALSE	FALSE	FALSE	FALSE	F	0.742	non-black
260	OUTPATIENT	Low	Final result	0.49	4510-02-08	4510-02-08	Yes	CREATININE	0.49	1.11255	4510-02-06	0	NA	NA	Inf	6	4510-02-06	0	1	0	8	8	TRUE	42	18	0.5	0.4	0.96	0	0	0	0	0	1	NA	Inf	FALSE	Hispanic or Latino	NEVER	11	Female	FALSE	FALSE	FALSE	FALSE	FALSE	F	0.742	non-black
261	OUTPATIENT	Low	Final result	0.41	4510-02-11	4510-02-12	Yes	CREATININE	0.41	1.11255	4510-02-06	0	NA	NA	Inf	6	4510-02-06	0	1	0	8	8	TRUE	42	18	0.5	0.4	0.96	0	0	0	0	0	1	NA	Inf	FALSE	Hispanic or Latino	NEVER	11	Female	FALSE	FALSE	FALSE	FALSE	FALSE	F	0.742	non-black
262	OUTPATIENT	Low	Final result	0.43	4510-02-09	4510-02-09	Yes	CREATININE	0.43	1.11255	4510-02-06	0	NA	NA	Inf	6	4510-02-06	0	1	0	8	8	TRUE	42	18	0.5	0.4	0.96	0	0	0	0	0	1	NA	Inf	FALSE	Hispanic or Latino	NEVER	11	Female	FALSE	FALSE	FALSE	FALSE	FALSE	F	0.742	non-black
263	OUTPATIENT	*Unspecified	Final result	0.55	4510-02-06	4510-02-06	Yes	CREATININE	0.55	1.11255	4510-02-06	0	NA	NA	Inf	6	4510-02-06	0	1	0	8	8	TRUE	42	18	0.5	0.4	0.96	0	0	0	0	0	1	NA	Inf	FALSE	Hispanic or Latino	NEVER	11	Female	FALSE	FALSE	FALSE	FALSE	FALSE	F	0.742	non-black
264	OUTPATIENT	Low	Final result	0.46	4510-02-08	4510-02-08	Yes	CREATININE	0.46	1.11255	4510-02-06	0	NA	NA	Inf	6	4510-02-06	0	1	0	8	8	TRUE	42	18	0.5	0.4	0.96	0	0	0	0	0	1	NA	Inf	FALSE	Hispanic or Latino	NEVER	11	Female	FALSE	FALSE	FALSE	FALSE	FALSE	F	0.742	non-black
265	OUTPATIENT	*Unspecified	Edited Result - FINAL	0.72	4510-02-19	4510-02-19	Yes	CREATININE	0.72	1.11255	4510-02-06	0	NA	NA	Inf	6	4510-02-06	0	1	0	8	8	TRUE	42	18	0.5	0.4	0.96	0	0	0	0	0	1	NA	Inf	FALSE	Hispanic or Latino	NEVER	11	Female	FALSE	FALSE	FALSE	FALSE	FALSE	F	0.742	non-black
266	OUTPATIENT	Low	Final result	0.47	4510-03-06	4510-03-06	Yes	CREATININE	0.47	1.11255	4510-02-06	0	NA	NA	Inf	6	4510-02-06	0	1	0	8	8	TRUE	42	18	0.5	0.4	0.96	0	0	0	0	0	1	NA	Inf	FALSE	Hispanic or Latino	NEVER	11	Female	FALSE	FALSE	FALSE	FALSE	FALSE	F	0.742	non-black
267	OUTPATIENT	*Unspecified	Edited Result - FINAL	0.59	4510-06-04	4510-06-04	Yes	CREATININE	0.59	1.11255	4510-02-06	0	NA	NA	Inf	6	4510-02-06	0	1	0	8	8	TRUE	42	18	0.5	0.4	0.96	0	0	0	0	0	1	NA	Inf	FALSE	Hispanic or Latino	NEVER	11	Female	FALSE	FALSE	FALSE	FALSE	FALSE	F	0.742	non-black
268	OUTPATIENT	*Unspecified	Edited Result - FINAL	0.64	4510-03-21	4510-03-22	Yes	CREATININE	0.64	1.39913	4510-02-06	0	NA	NA	Inf	6	4510-02-06	5	1	1	1	1	TRUE	797	NA	1.8	NA	NA	0	0	0	0	0	1	NA	Inf	FALSE	Unknown / Not Reported	NEVER	13	Male	FALSE	FALSE	FALSE	FALSE	FALSE	M	1	non-black
269	OUTPATIENT	*Unspecified	Edited Result - FINAL	0.56	4510-02-14	4510-02-15	Yes	CREATININE	0.56	1.39913	4510-02-06	0	NA	NA	Inf	6	4510-02-06	5	1	1	1	1	TRUE	797	NA	1.8	NA	NA	0	0	0	0	0	1	NA	Inf	FALSE	Unknown / Not Reported	NEVER	13	Male	FALSE	FALSE	FALSE	FALSE	FALSE	M	1	non-black
270	OUTPATIENT	*Unspecified	Edited Result - FINAL	0.33	4510-02-22	4510-02-22	Yes	CREATININE	0.33	1.39824	4510-02-13	0	NA	NA	Inf	5	4510-02-13	2	1	0	1	1	FALSE	555	6	2.2	NA	0.29	0	0	0	0	0	1	NA	Inf	FALSE	Hispanic or Latino	NEVER	3	Female	FALSE	FALSE	FALSE	FALSE	FALSE	F	0.742	non-black
271	OUTPATIENT	*Unspecified	Edited Result - FINAL	0.4	4510-03-12	4510-03-12	Yes	CREATININE	0.4	1.39824	4510-02-13	0	NA	NA	Inf	5	4510-02-13	2	1	0	1	1	FALSE	555	6	2.2	NA	0.29	0	0	0	0	0	1	NA	Inf	FALSE	Hispanic or Latino	NEVER	3	Female	FALSE	FALSE	FALSE	FALSE	FALSE	F	0.742	non-black
272	OUTPATIENT	*Unspecified	Edited Result - FINAL	0.37	4510-09-03	4510-09-03	Yes	CREATININE	0.37	1.39824	4510-02-13	0	NA	NA	Inf	5	4510-02-13	2	1	0	1	1	FALSE	555	6	2.2	NA	0.29	0	0	0	0	0	1	NA	Inf	FALSE	Hispanic or Latino	NEVER	3	Female	FALSE	FALSE	FALSE	FALSE	FALSE	F	0.742	non-black
273	OUTPATIENT	*Unspecified	Edited Result - FINAL	0.36	4510-06-04	4510-06-04	Yes	CREATININE	0.36	1.39824	4510-02-13	0	NA	NA	Inf	5	4510-02-13	2	1	0	1	1	FALSE	555	6	2.2	NA	0.29	0	0	0	0	0	1	NA	Inf	FALSE	Hispanic or Latino	NEVER	3	Female	FALSE	FALSE	FALSE	FALSE	FALSE	F	0.742	non-black
274	OUTPATIENT	Low	Final result	0.29	4510-02-13	4510-02-13	Yes	CREATININE	0.29	1.39824	4510-02-13	0	NA	NA	Inf	5	4510-02-13	2	1	0	1	1	FALSE	555	6	2.2	NA	0.29	0	0	0	0	0	1	NA	Inf	FALSE	Hispanic or Latino	NEVER	3	Female	FALSE	FALSE	FALSE	FALSE	FALSE	F	0.742	non-black
275	OUTPATIENT	Low	Final result	0.24	4510-02-14	4510-02-14	Yes	CREATININE	0.24	1.39824	4510-02-13	0	NA	NA	Inf	5	4510-02-13	2	1	0	1	1	FALSE	555	6	2.2	NA	0.29	0	0	0	0	0	1	NA	Inf	FALSE	Hispanic or Latino	NEVER	3	Female	FALSE	FALSE	FALSE	FALSE	FALSE	F	0.742	non-black
276	OUTPATIENT	Low	Final result	0.24	4510-02-15	4510-02-15	Yes	CREATININE	0.24	1.39824	4510-02-13	0	NA	NA	Inf	5	4510-02-13	2	1	0	1	1	FALSE	555	6	2.2	NA	0.29	0	0	0	0	0	1	NA	Inf	FALSE	Hispanic or Latino	NEVER	3	Female	FALSE	FALSE	FALSE	FALSE	FALSE	F	0.742	non-black
277	OUTPATIENT	Low	Final result	0.45	4510-02-17	4510-02-17	Yes	CREATININE	0.45	1.27437	4510-02-17	0	NA	NA	Inf	6	4510-02-17	0	1	0	1	1	TRUE	229	7	1.2	1.2	0.56	0	0	0	0	0	1	NA	Inf	FALSE	NOT Hispanic or Latino	NEVER	13	Female	FALSE	FALSE	FALSE	FALSE	FALSE	F	0.742	non-black
278	OUTPATIENT	*Unspecified	Final result	0.61	4510-02-18	4510-02-18	Yes	CREATININE	0.61	1.27437	4510-02-17	0	NA	NA	Inf	6	4510-02-17	0	1	0	1	1	TRUE	229	7	1.2	1.2	0.56	0	0	0	0	0	1	NA	Inf	FALSE	NOT Hispanic or Latino	NEVER	13	Female	FALSE	FALSE	FALSE	FALSE	FALSE	F	0.742	non-black
279	OUTPATIENT	*Unspecified	Final result	0.56	4510-02-17	4510-02-17	Yes	CREATININE	0.56	1.27437	4510-02-17	0	NA	NA	Inf	6	4510-02-17	0	1	0	1	1	TRUE	229	7	1.2	1.2	0.56	0	0	0	0	0	1	NA	Inf	FALSE	NOT Hispanic or Latino	NEVER	13	Female	FALSE	FALSE	FALSE	FALSE	FALSE	F	0.742	non-black
280	OUTPATIENT	*Unspecified	Final result	0.55	4510-02-20	4510-02-20	Yes	CREATININE	0.55	1.27437	4510-02-17	0	NA	NA	Inf	6	4510-02-17	0	1	0	1	1	TRUE	229	7	1.2	1.2	0.56	0	0	0	0	0	1	NA	Inf	FALSE	NOT Hispanic or Latino	NEVER	13	Female	FALSE	FALSE	FALSE	FALSE	FALSE	F	0.742	non-black
281	OUTPATIENT	*Unspecified	Final result	0.61	4510-02-19	4510-02-19	Yes	CREATININE	0.61	1.27437	4510-02-17	0	NA	NA	Inf	6	4510-02-17	0	1	0	1	1	TRUE	229	7	1.2	1.2	0.56	0	0	0	0	0	1	NA	Inf	FALSE	NOT Hispanic or Latino	NEVER	13	Female	FALSE	FALSE	FALSE	FALSE	FALSE	F	0.742	non-black
282	OUTPATIENT	*Unspecified	Final result	0.57	4510-02-21	4510-02-22	Yes	CREATININE	0.57	1.27437	4510-02-17	0	NA	NA	Inf	6	4510-02-17	0	1	0	1	1	TRUE	229	7	1.2	1.2	0.56	0	0	0	0	0	1	NA	Inf	FALSE	NOT Hispanic or Latino	NEVER	13	Female	FALSE	FALSE	FALSE	FALSE	FALSE	F	0.742	non-black
283	OUTPATIENT	Low	Preliminary result	0.46	4510-02-22	4510-02-22	No	CREATININE	0.46	1.27437	4510-02-17	0	NA	NA	Inf	6	4510-02-17	0	1	0	1	1	TRUE	229	7	1.2	1.2	0.56	0	0	0	0	0	1	NA	Inf	FALSE	NOT Hispanic or Latino	NEVER	13	Female	FALSE	FALSE	FALSE	FALSE	FALSE	F	0.742	non-black
284	OUTPATIENT	*Unspecified	Edited Result - FINAL	0.59	4510-03-19	4510-03-20	Yes	CREATININE	0.59	1.27437	4510-02-17	0	NA	NA	Inf	6	4510-02-17	0	1	0	1	1	TRUE	229	7	1.2	1.2	0.56	0	0	0	0	0	1	NA	Inf	FALSE	NOT Hispanic or Latino	NEVER	13	Female	FALSE	FALSE	FALSE	FALSE	FALSE	F	0.742	non-black
285	OUTPATIENT	Low	Final result	0.34	4510-02-20	4510-02-20	Yes	CREATININE	0.34	1.11255	4510-02-19	0	NA	NA	Inf	6	4510-02-19	3	1	0	3	3	FALSE	NA	9	NA	NA	0.34	0	0	0	0	0	1	NA	Inf	FALSE	Hispanic or Latino	NEVER	11	Female	FALSE	FALSE	TRUE	FALSE	FALSE	F	0.742	non-black
286	OUTPATIENT	Low	Final result	0.34	4510-02-19	4510-02-19	Yes	CREATININE	0.34	1.11255	4510-02-19	0	NA	NA	Inf	6	4510-02-19	3	1	0	3	3	FALSE	NA	9	NA	NA	0.34	0	0	0	0	0	1	NA	Inf	FALSE	Hispanic or Latino	NEVER	11	Female	FALSE	FALSE	TRUE	FALSE	FALSE	F	0.742	non-black
287	OUTPATIENT	Low	Final result	0.33	4510-02-21	4510-02-21	Yes	CREATININE	0.33	1.11255	4510-02-19	0	NA	NA	Inf	6	4510-02-19	3	1	0	3	3	FALSE	NA	9	NA	NA	0.34	0	0	0	0	0	1	NA	Inf	FALSE	Hispanic or Latino	NEVER	11	Female	FALSE	FALSE	TRUE	FALSE	FALSE	F	0.742	non-black
288	OUTPATIENT	High	Final result	2.29	4510-01-30	4510-01-30	Yes	CREATININE	2.29	0.51	4510-01-20	3	4510-01-15	4510-01-24	1	11	4510-01-20	6	2	1	3	0	FALSE	355	80	0.4	NA	4.1	1	0	1	1	5.55131e+06	6.7444	4510-01-14	-5	FALSE	Hispanic or Latino	NEVER	23	Male	FALSE	TRUE	FALSE	FALSE	FALSE	M	1	non-black
289	OUTPATIENT	High	Final result	1.93	4510-02-22	4510-02-23	Yes	CREATININE	1.93	0.51	4510-01-20	3	4510-01-15	4510-01-24	1	11	4510-01-20	6	2	1	3	0	FALSE	355	80	0.4	NA	4.1	1	0	1	1	5.55131e+06	6.7444	4510-01-14	-5	FALSE	Hispanic or Latino	NEVER	23	Male	FALSE	TRUE	FALSE	FALSE	FALSE	M	1	non-black
290	OUTPATIENT	High	Final result	1.82	4510-04-02	4510-04-02	Yes	CREATININE	1.82	0.51	4510-01-20	3	4510-01-15	4510-01-24	1	11	4510-01-20	6	2	1	3	0	FALSE	355	80	0.4	NA	4.1	1	0	1	1	5.55131e+06	6.7444	4510-01-14	-5	FALSE	Hispanic or Latino	NEVER	23	Male	FALSE	TRUE	FALSE	FALSE	FALSE	M	1	non-black
291	OUTPATIENT	High	Final result	1.77	4510-07-10	4510-07-10	Yes	CREATININE	1.77	0.51	4510-01-20	3	4510-01-15	4510-01-24	1	11	4510-01-20	6	2	1	3	0	FALSE	355	80	0.4	NA	4.1	1	0	1	1	5.55131e+06	6.7444	4510-01-14	-5	FALSE	Hispanic or Latino	NEVER	23	Male	FALSE	TRUE	FALSE	FALSE	FALSE	M	1	non-black
292	OUTPATIENT	High	Final result	2.4	4510-01-30	4510-01-30	Yes	CREATININE	2.4	0.51	4510-01-20	3	4510-01-15	4510-01-24	1	11	4510-01-20	6	2	1	3	0	FALSE	355	80	0.4	NA	4.1	1	0	1	1	5.55131e+06	6.7444	4510-01-14	-5	FALSE	Hispanic or Latino	NEVER	23	Male	FALSE	TRUE	FALSE	FALSE	FALSE	M	1	non-black
293	OUTPATIENT	High	Final result	2.25	4510-02-01	4510-02-01	Yes	CREATININE	2.25	0.51	4510-01-20	3	4510-01-15	4510-01-24	1	11	4510-01-20	6	2	1	3	0	FALSE	355	80	0.4	NA	4.1	1	0	1	1	5.55131e+06	6.7444	4510-01-14	-5	FALSE	Hispanic or Latino	NEVER	23	Male	FALSE	TRUE	FALSE	FALSE	FALSE	M	1	non-black
294	OUTPATIENT	High	Final result	2.02	4510-06-11	4510-06-11	Yes	CREATININE	2.02	0.51	4510-01-20	3	4510-01-15	4510-01-24	1	11	4510-01-20	6	2	1	3	0	FALSE	355	80	0.4	NA	4.1	1	0	1	1	5.55131e+06	6.7444	4510-01-14	-5	FALSE	Hispanic or Latino	NEVER	23	Male	FALSE	TRUE	FALSE	FALSE	FALSE	M	1	non-black
295	OUTPATIENT	High	Final result	2.11	4510-06-25	4510-06-25	Yes	CREATININE	2.11	0.51	4510-01-20	3	4510-01-15	4510-01-24	1	11	4510-01-20	6	2	1	3	0	FALSE	355	80	0.4	NA	4.1	1	0	1	1	5.55131e+06	6.7444	4510-01-14	-5	FALSE	Hispanic or Latino	NEVER	23	Male	FALSE	TRUE	FALSE	FALSE	FALSE	M	1	non-black
296	OUTPATIENT	High	Final result	1.73	4510-03-27	4510-03-27	Yes	CREATININE	1.73	0.51	4510-01-20	3	4510-01-15	4510-01-24	1	11	4510-01-20	6	2	1	3	0	FALSE	355	80	0.4	NA	4.1	1	0	1	1	5.55131e+06	6.7444	4510-01-14	-5	FALSE	Hispanic or Latino	NEVER	23	Male	FALSE	TRUE	FALSE	FALSE	FALSE	M	1	non-black
297	OUTPATIENT	High	Final result	1.82	4510-04-18	4510-04-18	Yes	CREATININE	1.82	0.51	4510-01-20	3	4510-01-15	4510-01-24	1	11	4510-01-20	6	2	1	3	0	FALSE	355	80	0.4	NA	4.1	1	0	1	1	5.55131e+06	6.7444	4510-01-14	-5	FALSE	Hispanic or Latino	NEVER	23	Male	FALSE	TRUE	FALSE	FALSE	FALSE	M	1	non-black
298	OUTPATIENT	High	Final result	5.31	4510-01-22	4510-01-22	Yes	CREATININE	5.31	0.51	4510-01-20	3	4510-01-15	4510-01-24	1	11	4510-01-20	6	2	1	3	0	FALSE	355	80	0.4	NA	4.1	1	0	1	1	5.55131e+06	6.7444	4510-01-14	-5	FALSE	Hispanic or Latino	NEVER	23	Male	FALSE	TRUE	FALSE	FALSE	FALSE	M	1	non-black
299	OUTPATIENT	High	Final result	2.54	4510-01-24	4510-01-24	Yes	CREATININE	2.54	0.51	4510-01-20	3	4510-01-15	4510-01-24	1	11	4510-01-20	6	2	1	3	0	FALSE	355	80	0.4	NA	4.1	1	0	1	1	5.55131e+06	6.7444	4510-01-14	-5	FALSE	Hispanic or Latino	NEVER	23	Male	FALSE	TRUE	FALSE	FALSE	FALSE	M	1	non-black
300	OUTPATIENT	High	Final result	5.49	4510-01-21	4510-01-21	Yes	CREATININE	5.49	0.51	4510-01-20	3	4510-01-15	4510-01-24	1	11	4510-01-20	6	2	1	3	0	FALSE	355	80	0.4	NA	4.1	1	0	1	1	5.55131e+06	6.7444	4510-01-14	-5	FALSE	Hispanic or Latino	NEVER	23	Male	FALSE	TRUE	FALSE	FALSE	FALSE	M	1	non-black
301	OUTPATIENT	High	Final result	4.32	4510-01-21	4510-01-21	Yes	CREATININE	4.32	0.51	4510-01-20	3	4510-01-15	4510-01-24	1	11	4510-01-20	6	2	1	3	0	FALSE	355	80	0.4	NA	4.1	1	0	1	1	5.55131e+06	6.7444	4510-01-14	-5	FALSE	Hispanic or Latino	NEVER	23	Male	FALSE	TRUE	FALSE	FALSE	FALSE	M	1	non-black
302	OUTPATIENT	High	Final result	2.89	4510-01-23	4510-01-23	Yes	CREATININE	2.89	0.51	4510-01-20	3	4510-01-15	4510-01-24	1	11	4510-01-20	6	2	1	3	0	FALSE	355	80	0.4	NA	4.1	1	0	1	1	5.55131e+06	6.7444	4510-01-14	-5	FALSE	Hispanic or Latino	NEVER	23	Male	FALSE	TRUE	FALSE	FALSE	FALSE	M	1	non-black
303	OUTPATIENT	High	Final result	4.71	4510-01-22	4510-01-22	Yes	CREATININE	4.71	0.51	4510-01-20	3	4510-01-15	4510-01-24	1	11	4510-01-20	6	2	1	3	0	FALSE	355	80	0.4	NA	4.1	1	0	1	1	5.55131e+06	6.7444	4510-01-14	-5	FALSE	Hispanic or Latino	NEVER	23	Male	FALSE	TRUE	FALSE	FALSE	FALSE	M	1	non-black
304	OUTPATIENT	High	Final result	4.1	4510-01-20	4510-01-20	Yes	CREATININE	4.1	0.51	4510-01-20	3	4510-01-15	4510-01-24	1	11	4510-01-20	6	2	1	3	0	FALSE	355	80	0.4	NA	4.1	1	0	1	1	5.55131e+06	6.7444	4510-01-14	-5	FALSE	Hispanic or Latino	NEVER	23	Male	FALSE	TRUE	FALSE	FALSE	FALSE	M	1	non-black
305	OUTPATIENT	High	Final result	2.32	4511-02-10	4511-02-10	Yes	CREATININE	2.32	0.51	4510-01-20	3	4510-01-15	4510-01-24	1	11	4510-01-20	6	2	1	3	0	FALSE	355	80	0.4	NA	4.1	1	0	1	1	5.55131e+06	6.7444	4510-01-14	-5	FALSE	Hispanic or Latino	NEVER	23	Male	FALSE	TRUE	FALSE	FALSE	FALSE	M	1	non-black
306	OUTPATIENT	High	Final result	2.12	4510-12-04	4510-12-05	Yes	CREATININE	2.12	0.51	4510-01-20	3	4510-01-15	4510-01-24	1	11	4510-01-20	6	2	1	3	0	FALSE	355	80	0.4	NA	4.1	1	0	1	1	5.55131e+06	6.7444	4510-01-14	-5	FALSE	Hispanic or Latino	NEVER	23	Male	FALSE	TRUE	FALSE	FALSE	FALSE	M	1	non-black
307	OUTPATIENT	High	Final result	1.91	4510-10-10	4510-10-10	Yes	CREATININE	1.91	0.51	4510-01-20	3	4510-01-15	4510-01-24	1	11	4510-01-20	6	2	1	3	0	FALSE	355	80	0.4	NA	4.1	1	0	1	1	5.55131e+06	6.7444	4510-01-14	-5	FALSE	Hispanic or Latino	NEVER	23	Male	FALSE	TRUE	FALSE	FALSE	FALSE	M	1	non-black
308	OUTPATIENT	*Unspecified	Final result	0.76	4510-01-29	4510-01-29	Yes	CREATININE	0.76	0.65	4510-01-29	0	NA	NA	Inf	10	4510-01-29	6	2	2	4	4	FALSE	62	45	0.3	NA	0.76	0	1	0	0	0	1	NA	Inf	FALSE	NOT Hispanic or Latino	QUIT	85	Male	TRUE	TRUE	TRUE	FALSE	FALSE	M	1	non-black
309	OUTPATIENT	*Unspecified	Final result	0.97	4510-01-31	4510-01-31	Yes	CREATININE	0.97	0.65	4510-01-29	0	NA	NA	Inf	10	4510-01-29	6	2	2	4	4	FALSE	62	45	0.3	NA	0.76	0	1	0	0	0	1	NA	Inf	FALSE	NOT Hispanic or Latino	QUIT	85	Male	TRUE	TRUE	TRUE	FALSE	FALSE	M	1	non-black
310	OUTPATIENT	*Unspecified	Final result	0.71	4510-02-01	4510-02-01	Yes	CREATININE	0.71	0.65	4510-01-29	0	NA	NA	Inf	10	4510-01-29	6	2	2	4	4	FALSE	62	45	0.3	NA	0.76	0	1	0	0	0	1	NA	Inf	FALSE	NOT Hispanic or Latino	QUIT	85	Male	TRUE	TRUE	TRUE	FALSE	FALSE	M	1	non-black
311	OUTPATIENT	*Unspecified	Final result	0.91	4510-01-31	4510-01-31	Yes	CREATININE	0.91	0.65	4510-01-29	0	NA	NA	Inf	10	4510-01-29	6	2	2	4	4	FALSE	62	45	0.3	NA	0.76	0	1	0	0	0	1	NA	Inf	FALSE	NOT Hispanic or Latino	QUIT	85	Male	TRUE	TRUE	TRUE	FALSE	FALSE	M	1	non-black
312	OUTPATIENT	*Unspecified	Final result	0.91	4510-01-31	4510-01-31	Yes	CREATININE	0.91	0.65	4510-01-29	0	NA	NA	Inf	10	4510-01-29	6	2	2	4	4	FALSE	62	45	0.3	NA	0.76	0	1	0	0	0	1	NA	Inf	FALSE	NOT Hispanic or Latino	QUIT	85	Male	TRUE	TRUE	TRUE	FALSE	FALSE	M	1	non-black
313	OUTPATIENT	*Unspecified	Final result	0.91	4510-01-31	4510-01-31	Yes	CREATININE	0.91	0.65	4510-01-29	0	NA	NA	Inf	10	4510-01-29	6	2	2	4	4	FALSE	62	45	0.3	NA	0.76	0	1	0	0	0	1	NA	Inf	FALSE	NOT Hispanic or Latino	QUIT	85	Male	TRUE	TRUE	TRUE	FALSE	FALSE	M	1	non-black
314	OUTPATIENT	*Unspecified	Preliminary result	0.84	4510-01-30	4510-01-30	No	CREATININE	0.84	0.65	4510-01-29	0	NA	NA	Inf	10	4510-01-29	6	2	2	4	4	FALSE	62	45	0.3	NA	0.76	0	1	0	0	0	1	NA	Inf	FALSE	NOT Hispanic or Latino	QUIT	85	Male	TRUE	TRUE	TRUE	FALSE	FALSE	M	1	non-black
315	OUTPATIENT	High	Final result	2.44	4510-07-11	4510-07-11	Yes	CREATININE	2.44	2.01	4510-01-28	1	4510-01-22	4510-01-23	Inf	13	4510-01-28	9	1	1	2	0	FALSE	170	48	0.2	NA	2.05	1	0	0	0	0	1	NA	-6	FALSE	NOT Hispanic or Latino	QUIT	86	Male	FALSE	TRUE	FALSE	TRUE	FALSE	M	1	non-black
316	OUTPATIENT	High	Final result	2.57	4510-04-11	4510-04-11	Yes	CREATININE	2.57	2.01	4510-01-28	1	4510-01-22	4510-01-23	Inf	13	4510-01-28	9	1	1	2	0	FALSE	170	48	0.2	NA	2.05	1	0	0	0	0	1	NA	-6	FALSE	NOT Hispanic or Latino	QUIT	86	Male	FALSE	TRUE	FALSE	TRUE	FALSE	M	1	non-black
317	OUTPATIENT	High	Final result	2.41	4510-07-04	4510-07-04	Yes	CREATININE	2.41	2.01	4510-01-28	1	4510-01-22	4510-01-23	Inf	13	4510-01-28	9	1	1	2	0	FALSE	170	48	0.2	NA	2.05	1	0	0	0	0	1	NA	-6	FALSE	NOT Hispanic or Latino	QUIT	86	Male	FALSE	TRUE	FALSE	TRUE	FALSE	M	1	non-black
318	OUTPATIENT	High	Final result	2.57	4510-04-11	4510-04-11	Yes	CREATININE	2.57	2.01	4510-01-28	1	4510-01-22	4510-01-23	Inf	13	4510-01-28	9	1	1	2	0	FALSE	170	48	0.2	NA	2.05	1	0	0	0	0	1	NA	-6	FALSE	NOT Hispanic or Latino	QUIT	86	Male	FALSE	TRUE	FALSE	TRUE	FALSE	M	1	non-black
319	OUTPATIENT	High	Final result	2.09	4510-08-01	4510-08-01	Yes	CREATININE	2.09	2.01	4510-01-28	1	4510-01-22	4510-01-23	Inf	13	4510-01-28	9	1	1	2	0	FALSE	170	48	0.2	NA	2.05	1	0	0	0	0	1	NA	-6	FALSE	NOT Hispanic or Latino	QUIT	86	Male	FALSE	TRUE	FALSE	TRUE	FALSE	M	1	non-black
320	OUTPATIENT	High	Final result	2.38	4510-03-14	4510-03-14	Yes	CREATININE	2.38	2.01	4510-01-28	1	4510-01-22	4510-01-23	Inf	13	4510-01-28	9	1	1	2	0	FALSE	170	48	0.2	NA	2.05	1	0	0	0	0	1	NA	-6	FALSE	NOT Hispanic or Latino	QUIT	86	Male	FALSE	TRUE	FALSE	TRUE	FALSE	M	1	non-black
321	OUTPATIENT	High	Final result	2.04	4510-08-29	4510-08-29	Yes	CREATININE	2.04	2.01	4510-01-28	1	4510-01-22	4510-01-23	Inf	13	4510-01-28	9	1	1	2	0	FALSE	170	48	0.2	NA	2.05	1	0	0	0	0	1	NA	-6	FALSE	NOT Hispanic or Latino	QUIT	86	Male	FALSE	TRUE	FALSE	TRUE	FALSE	M	1	non-black
322	OUTPATIENT	High	Final result	2.16	4510-09-27	4510-09-27	Yes	CREATININE	2.16	2.01	4510-01-28	1	4510-01-22	4510-01-23	Inf	13	4510-01-28	9	1	1	2	0	FALSE	170	48	0.2	NA	2.05	1	0	0	0	0	1	NA	-6	FALSE	NOT Hispanic or Latino	QUIT	86	Male	FALSE	TRUE	FALSE	TRUE	FALSE	M	1	non-black
323	OUTPATIENT	High	Final result	2.31	4510-06-06	4510-06-06	Yes	CREATININE	2.31	2.01	4510-01-28	1	4510-01-22	4510-01-23	Inf	13	4510-01-28	9	1	1	2	0	FALSE	170	48	0.2	NA	2.05	1	0	0	0	0	1	NA	-6	FALSE	NOT Hispanic or Latino	QUIT	86	Male	FALSE	TRUE	FALSE	TRUE	FALSE	M	1	non-black
324	OUTPATIENT	High	Final result	2.32	4510-05-09	4510-05-09	Yes	CREATININE	2.32	2.01	4510-01-28	1	4510-01-22	4510-01-23	Inf	13	4510-01-28	9	1	1	2	0	FALSE	170	48	0.2	NA	2.05	1	0	0	0	0	1	NA	-6	FALSE	NOT Hispanic or Latino	QUIT	86	Male	FALSE	TRUE	FALSE	TRUE	FALSE	M	1	non-black
325	OUTPATIENT	High	Final result	2.24	4510-01-30	4510-01-30	Yes	CREATININE	2.24	2.01	4510-01-28	1	4510-01-22	4510-01-23	Inf	13	4510-01-28	9	1	1	2	0	FALSE	170	48	0.2	NA	2.05	1	0	0	0	0	1	NA	-6	FALSE	NOT Hispanic or Latino	QUIT	86	Male	FALSE	TRUE	FALSE	TRUE	FALSE	M	1	non-black
326	OUTPATIENT	High	Final result	2.17	4510-01-31	4510-01-31	Yes	CREATININE	2.17	2.01	4510-01-28	1	4510-01-22	4510-01-23	Inf	13	4510-01-28	9	1	1	2	0	FALSE	170	48	0.2	NA	2.05	1	0	0	0	0	1	NA	-6	FALSE	NOT Hispanic or Latino	QUIT	86	Male	FALSE	TRUE	FALSE	TRUE	FALSE	M	1	non-black
327	OUTPATIENT	High	Final result	2.16	4510-01-29	4510-01-29	Yes	CREATININE	2.16	2.01	4510-01-28	1	4510-01-22	4510-01-23	Inf	13	4510-01-28	9	1	1	2	0	FALSE	170	48	0.2	NA	2.05	1	0	0	0	0	1	NA	-6	FALSE	NOT Hispanic or Latino	QUIT	86	Male	FALSE	TRUE	FALSE	TRUE	FALSE	M	1	non-black
328	OUTPATIENT	High	Final result	2.05	4510-01-28	4510-01-28	Yes	CREATININE	2.05	2.01	4510-01-28	1	4510-01-22	4510-01-23	Inf	13	4510-01-28	9	1	1	2	0	FALSE	170	48	0.2	NA	2.05	1	0	0	0	0	1	NA	-6	FALSE	NOT Hispanic or Latino	QUIT	86	Male	FALSE	TRUE	FALSE	TRUE	FALSE	M	1	non-black
329	OUTPATIENT	High	Final result	2.5	4511-07-17	4511-07-17	Yes	CREATININE	2.5	2.01	4510-01-28	1	4510-01-22	4510-01-23	Inf	13	4510-01-28	9	1	1	2	0	FALSE	170	48	0.2	NA	2.05	1	0	0	0	0	1	NA	-6	FALSE	NOT Hispanic or Latino	QUIT	86	Male	FALSE	TRUE	FALSE	TRUE	FALSE	M	1	non-black
330	OUTPATIENT	High	Final result	2.2	4511-07-04	4511-07-04	Yes	CREATININE	2.2	2.01	4510-01-28	1	4510-01-22	4510-01-23	Inf	13	4510-01-28	9	1	1	2	0	FALSE	170	48	0.2	NA	2.05	1	0	0	0	0	1	NA	-6	FALSE	NOT Hispanic or Latino	QUIT	86	Male	FALSE	TRUE	FALSE	TRUE	FALSE	M	1	non-black
331	OUTPATIENT	High	Final result	2.2	4510-09-27	4510-09-27	Yes	CREATININE	2.2	2.01	4510-01-28	1	4510-01-22	4510-01-23	Inf	13	4510-01-28	9	1	1	2	0	FALSE	170	48	0.2	NA	2.05	1	0	0	0	0	1	NA	-6	FALSE	NOT Hispanic or Latino	QUIT	86	Male	FALSE	TRUE	FALSE	TRUE	FALSE	M	1	non-black
332	OUTPATIENT	High	Final result	2.34	4510-07-12	4510-07-12	Yes	CREATININE	2.34	2.01	4510-01-28	1	4510-01-22	4510-01-23	Inf	13	4510-01-28	9	1	1	2	0	FALSE	170	48	0.2	NA	2.05	1	0	0	0	0	1	NA	-6	FALSE	NOT Hispanic or Latino	QUIT	86	Male	FALSE	TRUE	FALSE	TRUE	FALSE	M	1	non-black
333	OUTPATIENT	High	Final result	2.32	4511-05-11	4511-05-12	Yes	CREATININE	2.32	2.01	4510-01-28	1	4510-01-22	4510-01-23	Inf	13	4510-01-28	9	1	1	2	0	FALSE	170	48	0.2	NA	2.05	1	0	0	0	0	1	NA	-6	FALSE	NOT Hispanic or Latino	QUIT	86	Male	FALSE	TRUE	FALSE	TRUE	FALSE	M	1	non-black
334	OUTPATIENT	High	Final result	2.37	4511-06-16	4511-06-16	Yes	CREATININE	2.37	2.01	4510-01-28	1	4510-01-22	4510-01-23	Inf	13	4510-01-28	9	1	1	2	0	FALSE	170	48	0.2	NA	2.05	1	0	0	0	0	1	NA	-6	FALSE	NOT Hispanic or Latino	QUIT	86	Male	FALSE	TRUE	FALSE	TRUE	FALSE	M	1	non-black
335	OUTPATIENT	High	Final result	1.8	4511-01-02	4511-01-02	Yes	CREATININE	1.8	2.01	4510-01-28	1	4510-01-22	4510-01-23	Inf	13	4510-01-28	9	1	1	2	0	FALSE	170	48	0.2	NA	2.05	1	0	0	0	0	1	NA	-6	FALSE	NOT Hispanic or Latino	QUIT	86	Male	FALSE	TRUE	FALSE	TRUE	FALSE	M	1	non-black
336	OUTPATIENT	High	Final result	1.98	4511-04-12	4511-04-12	Yes	CREATININE	1.98	2.01	4510-01-28	1	4510-01-22	4510-01-23	Inf	13	4510-01-28	9	1	1	2	0	FALSE	170	48	0.2	NA	2.05	1	0	0	0	0	1	NA	-6	FALSE	NOT Hispanic or Latino	QUIT	86	Male	FALSE	TRUE	FALSE	TRUE	FALSE	M	1	non-black
337	OUTPATIENT	High	Final result	2.29	4511-02-27	4511-02-27	Yes	CREATININE	2.29	2.01	4510-01-28	1	4510-01-22	4510-01-23	Inf	13	4510-01-28	9	1	1	2	0	FALSE	170	48	0.2	NA	2.05	1	0	0	0	0	1	NA	-6	FALSE	NOT Hispanic or Latino	QUIT	86	Male	FALSE	TRUE	FALSE	TRUE	FALSE	M	1	non-black
338	OUTPATIENT	High	Final result	2.18	4511-01-30	4511-01-30	Yes	CREATININE	2.18	2.01	4510-01-28	1	4510-01-22	4510-01-23	Inf	13	4510-01-28	9	1	1	2	0	FALSE	170	48	0.2	NA	2.05	1	0	0	0	0	1	NA	-6	FALSE	NOT Hispanic or Latino	QUIT	86	Male	FALSE	TRUE	FALSE	TRUE	FALSE	M	1	non-black
339	OUTPATIENT	High	Final result	1.79	4510-12-05	4510-12-05	Yes	CREATININE	1.79	2.01	4510-01-28	1	4510-01-22	4510-01-23	Inf	13	4510-01-28	9	1	1	2	0	FALSE	170	48	0.2	NA	2.05	1	0	0	0	0	1	NA	-6	FALSE	NOT Hispanic or Latino	QUIT	86	Male	FALSE	TRUE	FALSE	TRUE	FALSE	M	1	non-black
340	OUTPATIENT	High	Final result	1.93	4510-11-07	4510-11-07	Yes	CREATININE	1.93	2.01	4510-01-28	1	4510-01-22	4510-01-23	Inf	13	4510-01-28	9	1	1	2	0	FALSE	170	48	0.2	NA	2.05	1	0	0	0	0	1	NA	-6	FALSE	NOT Hispanic or Latino	QUIT	86	Male	FALSE	TRUE	FALSE	TRUE	FALSE	M	1	non-black
341	OUTPATIENT	High	Final result	2.4	4511-03-06	4511-03-06	Yes	CREATININE	2.4	2.01	4510-01-28	1	4510-01-22	4510-01-23	Inf	13	4510-01-28	9	1	1	2	0	FALSE	170	48	0.2	NA	2.05	1	0	0	0	0	1	NA	-6	FALSE	NOT Hispanic or Latino	QUIT	86	Male	FALSE	TRUE	FALSE	TRUE	FALSE	M	1	non-black
342	OUTPATIENT	High	Final result	2.07	4511-01-21	4511-01-21	Yes	CREATININE	2.07	2.01	4510-01-28	1	4510-01-22	4510-01-23	Inf	13	4510-01-28	9	1	1	2	0	FALSE	170	48	0.2	NA	2.05	1	0	0	0	0	1	NA	-6	FALSE	NOT Hispanic or Latino	QUIT	86	Male	FALSE	TRUE	FALSE	TRUE	FALSE	M	1	non-black
343	OUTPATIENT	High	Final result	2.17	4510-07-15	4510-07-15	Yes	CREATININE	2.17	2.01	4510-01-28	1	4510-01-22	4510-01-23	Inf	13	4510-01-28	9	1	1	2	0	FALSE	170	48	0.2	NA	2.05	1	0	0	0	0	1	NA	-6	FALSE	NOT Hispanic or Latino	QUIT	86	Male	FALSE	TRUE	FALSE	TRUE	FALSE	M	1	non-black
344	OUTPATIENT	High	Final result	2.3	4510-07-12	4510-07-12	Yes	CREATININE	2.3	2.01	4510-01-28	1	4510-01-22	4510-01-23	Inf	13	4510-01-28	9	1	1	2	0	FALSE	170	48	0.2	NA	2.05	1	0	0	0	0	1	NA	-6	FALSE	NOT Hispanic or Latino	QUIT	86	Male	FALSE	TRUE	FALSE	TRUE	FALSE	M	1	non-black
345	OUTPATIENT	High	Final result	2.61	4510-07-12	4510-07-12	Yes	CREATININE	2.61	2.01	4510-01-28	1	4510-01-22	4510-01-23	Inf	13	4510-01-28	9	1	1	2	0	FALSE	170	48	0.2	NA	2.05	1	0	0	0	0	1	NA	-6	FALSE	NOT Hispanic or Latino	QUIT	86	Male	FALSE	TRUE	FALSE	TRUE	FALSE	M	1	non-black
346	OUTPATIENT	High	Final result	2.25	4510-07-13	4510-07-13	Yes	CREATININE	2.25	2.01	4510-01-28	1	4510-01-22	4510-01-23	Inf	13	4510-01-28	9	1	1	2	0	FALSE	170	48	0.2	NA	2.05	1	0	0	0	0	1	NA	-6	FALSE	NOT Hispanic or Latino	QUIT	86	Male	FALSE	TRUE	FALSE	TRUE	FALSE	M	1	non-black
347	OUTPATIENT	High	Final result	2.19	4510-07-14	4510-07-14	Yes	CREATININE	2.19	2.01	4510-01-28	1	4510-01-22	4510-01-23	Inf	13	4510-01-28	9	1	1	2	0	FALSE	170	48	0.2	NA	2.05	1	0	0	0	0	1	NA	-6	FALSE	NOT Hispanic or Latino	QUIT	86	Male	FALSE	TRUE	FALSE	TRUE	FALSE	M	1	non-black
348	OUTPATIENT	High	Final result	2.33	4511-04-07	4511-04-07	Yes	CREATININE	2.33	2.01	4510-01-28	1	4510-01-22	4510-01-23	Inf	13	4510-01-28	9	1	1	2	0	FALSE	170	48	0.2	NA	2.05	1	0	0	0	0	1	NA	-6	FALSE	NOT Hispanic or Latino	QUIT	86	Male	FALSE	TRUE	FALSE	TRUE	FALSE	M	1	non-black
349	OUTPATIENT	High	Final result	2.16	4511-04-10	4511-04-10	Yes	CREATININE	2.16	2.01	4510-01-28	1	4510-01-22	4510-01-23	Inf	13	4510-01-28	9	1	1	2	0	FALSE	170	48	0.2	NA	2.05	1	0	0	0	0	1	NA	-6	FALSE	NOT Hispanic or Latino	QUIT	86	Male	FALSE	TRUE	FALSE	TRUE	FALSE	M	1	non-black
350	OUTPATIENT	High	Final result	1.95	4511-04-11	4511-04-11	Yes	CREATININE	1.95	2.01	4510-01-28	1	4510-01-22	4510-01-23	Inf	13	4510-01-28	9	1	1	2	0	FALSE	170	48	0.2	NA	2.05	1	0	0	0	0	1	NA	-6	FALSE	NOT Hispanic or Latino	QUIT	86	Male	FALSE	TRUE	FALSE	TRUE	FALSE	M	1	non-black
351	OUTPATIENT	High	Final result	2.39	4511-04-08	4511-04-08	Yes	CREATININE	2.39	2.01	4510-01-28	1	4510-01-22	4510-01-23	Inf	13	4510-01-28	9	1	1	2	0	FALSE	170	48	0.2	NA	2.05	1	0	0	0	0	1	NA	-6	FALSE	NOT Hispanic or Latino	QUIT	86	Male	FALSE	TRUE	FALSE	TRUE	FALSE	M	1	non-black
352	OUTPATIENT	High	Final result	2.33	4511-04-07	4511-04-07	Yes	CREATININE	2.33	2.01	4510-01-28	1	4510-01-22	4510-01-23	Inf	13	4510-01-28	9	1	1	2	0	FALSE	170	48	0.2	NA	2.05	1	0	0	0	0	1	NA	-6	FALSE	NOT Hispanic or Latino	QUIT	86	Male	FALSE	TRUE	FALSE	TRUE	FALSE	M	1	non-black
353	OUTPATIENT	High	Final result	2.33	4511-04-09	4511-04-09	Yes	CREATININE	2.33	2.01	4510-01-28	1	4510-01-22	4510-01-23	Inf	13	4510-01-28	9	1	1	2	0	FALSE	170	48	0.2	NA	2.05	1	0	0	0	0	1	NA	-6	FALSE	NOT Hispanic or Latino	QUIT	86	Male	FALSE	TRUE	FALSE	TRUE	FALSE	M	1	non-black
354	OUTPATIENT	High	Final result	1.83	4511-01-02	4511-01-02	Yes	CREATININE	1.83	2.01	4510-01-28	1	4510-01-22	4510-01-23	Inf	13	4510-01-28	9	1	1	2	0	FALSE	170	48	0.2	NA	2.05	1	0	0	0	0	1	NA	-6	FALSE	NOT Hispanic or Latino	QUIT	86	Male	FALSE	TRUE	FALSE	TRUE	FALSE	M	1	non-black
355	OUTPATIENT	High	Final result	2.78	4511-04-25	4511-04-25	Yes	CREATININE	2.78	2.01	4510-01-28	1	4510-01-22	4510-01-23	Inf	13	4510-01-28	9	1	1	2	0	FALSE	170	48	0.2	NA	2.05	1	0	0	0	0	1	NA	-6	FALSE	NOT Hispanic or Latino	QUIT	86	Male	FALSE	TRUE	FALSE	TRUE	FALSE	M	1	non-black
356	OUTPATIENT	High	Final result	2.49	4511-07-14	4511-07-14	Yes	CREATININE	2.49	2.01	4510-01-28	1	4510-01-22	4510-01-23	Inf	13	4510-01-28	9	1	1	2	0	FALSE	170	48	0.2	NA	2.05	1	0	0	0	0	1	NA	-6	FALSE	NOT Hispanic or Latino	QUIT	86	Male	FALSE	TRUE	FALSE	TRUE	FALSE	M	1	non-black
357	OUTPATIENT	High	Final result	2.1	4511-07-15	4511-07-15	Yes	CREATININE	2.1	2.01	4510-01-28	1	4510-01-22	4510-01-23	Inf	13	4510-01-28	9	1	1	2	0	FALSE	170	48	0.2	NA	2.05	1	0	0	0	0	1	NA	-6	FALSE	NOT Hispanic or Latino	QUIT	86	Male	FALSE	TRUE	FALSE	TRUE	FALSE	M	1	non-black
358	OUTPATIENT	High	Final result	2.2	4511-07-16	4511-07-16	Yes	CREATININE	2.2	2.01	4510-01-28	1	4510-01-22	4510-01-23	Inf	13	4510-01-28	9	1	1	2	0	FALSE	170	48	0.2	NA	2.05	1	0	0	0	0	1	NA	-6	FALSE	NOT Hispanic or Latino	QUIT	86	Male	FALSE	TRUE	FALSE	TRUE	FALSE	M	1	non-black
359	OUTPATIENT	High	Final result	2.32	4511-07-18	4511-07-18	Yes	CREATININE	2.32	2.01	4510-01-28	1	4510-01-22	4510-01-23	Inf	13	4510-01-28	9	1	1	2	0	FALSE	170	48	0.2	NA	2.05	1	0	0	0	0	1	NA	-6	FALSE	NOT Hispanic or Latino	QUIT	86	Male	FALSE	TRUE	FALSE	TRUE	FALSE	M	1	non-black
360	OUTPATIENT	High	Final result	2.29	4511-07-04	4511-07-04	Yes	CREATININE	2.29	2.01	4510-01-28	1	4510-01-22	4510-01-23	Inf	13	4510-01-28	9	1	1	2	0	FALSE	170	48	0.2	NA	2.05	1	0	0	0	0	1	NA	-6	FALSE	NOT Hispanic or Latino	QUIT	86	Male	FALSE	TRUE	FALSE	TRUE	FALSE	M	1	non-black
361	OUTPATIENT	High	Final result	2.32	4511-01-20	4511-01-20	Yes	CREATININE	2.32	2.01	4510-01-28	1	4510-01-22	4510-01-23	Inf	13	4510-01-28	9	1	1	2	0	FALSE	170	48	0.2	NA	2.05	1	0	0	0	0	1	NA	-6	FALSE	NOT Hispanic or Latino	QUIT	86	Male	FALSE	TRUE	FALSE	TRUE	FALSE	M	1	non-black
362	OUTPATIENT	High	Final result	2.23	4511-01-20	4511-01-20	Yes	CREATININE	2.23	2.01	4510-01-28	1	4510-01-22	4510-01-23	Inf	13	4510-01-28	9	1	1	2	0	FALSE	170	48	0.2	NA	2.05	1	0	0	0	0	1	NA	-6	FALSE	NOT Hispanic or Latino	QUIT	86	Male	FALSE	TRUE	FALSE	TRUE	FALSE	M	1	non-black
363	OUTPATIENT	High	Final result	1.51	4511-01-18	4511-01-18	Yes	CREATININE	1.51	2.01	4510-01-28	1	4510-01-22	4510-01-23	Inf	13	4510-01-28	9	1	1	2	0	FALSE	170	48	0.2	NA	2.05	1	0	0	0	0	1	NA	-6	FALSE	NOT Hispanic or Latino	QUIT	86	Male	FALSE	TRUE	FALSE	TRUE	FALSE	M	1	non-black
364	OUTPATIENT	High	Final result	1.5	4511-01-18	4511-01-18	Yes	CREATININE	1.5	2.01	4510-01-28	1	4510-01-22	4510-01-23	Inf	13	4510-01-28	9	1	1	2	0	FALSE	170	48	0.2	NA	2.05	1	0	0	0	0	1	NA	-6	FALSE	NOT Hispanic or Latino	QUIT	86	Male	FALSE	TRUE	FALSE	TRUE	FALSE	M	1	non-black
365	OUTPATIENT	High	Final result	1.5	4511-01-17	4511-01-17	Yes	CREATININE	1.5	2.01	4510-01-28	1	4510-01-22	4510-01-23	Inf	13	4510-01-28	9	1	1	2	0	FALSE	170	48	0.2	NA	2.05	1	0	0	0	0	1	NA	-6	FALSE	NOT Hispanic or Latino	QUIT	86	Male	FALSE	TRUE	FALSE	TRUE	FALSE	M	1	non-black
366	OUTPATIENT	High	Final result	2.16	4511-01-19	4511-01-19	Yes	CREATININE	2.16	2.01	4510-01-28	1	4510-01-22	4510-01-23	Inf	13	4510-01-28	9	1	1	2	0	FALSE	170	48	0.2	NA	2.05	1	0	0	0	0	1	NA	-6	FALSE	NOT Hispanic or Latino	QUIT	86	Male	FALSE	TRUE	FALSE	TRUE	FALSE	M	1	non-black
367	OUTPATIENT	High	Final result	1.78	4511-01-18	4511-01-18	Yes	CREATININE	1.78	2.01	4510-01-28	1	4510-01-22	4510-01-23	Inf	13	4510-01-28	9	1	1	2	0	FALSE	170	48	0.2	NA	2.05	1	0	0	0	0	1	NA	-6	FALSE	NOT Hispanic or Latino	QUIT	86	Male	FALSE	TRUE	FALSE	TRUE	FALSE	M	1	non-black
368	OUTPATIENT	High	Final result	1.7	4511-01-18	4511-01-18	Yes	CREATININE	1.7	2.01	4510-01-28	1	4510-01-22	4510-01-23	Inf	13	4510-01-28	9	1	1	2	0	FALSE	170	48	0.2	NA	2.05	1	0	0	0	0	1	NA	-6	FALSE	NOT Hispanic or Latino	QUIT	86	Male	FALSE	TRUE	FALSE	TRUE	FALSE	M	1	non-black
369	OUTPATIENT	High	Final result	2.78	4511-04-25	4511-04-25	Yes	CREATININE	2.78	2.01	4510-01-28	1	4510-01-22	4510-01-23	Inf	13	4510-01-28	9	1	1	2	0	FALSE	170	48	0.2	NA	2.05	1	0	0	0	0	1	NA	-6	FALSE	NOT Hispanic or Latino	QUIT	86	Male	FALSE	TRUE	FALSE	TRUE	FALSE	M	1	non-black
370	OUTPATIENT	*Unspecified	Final result	0.88	4510-02-25	4510-02-25	Yes	CREATININE	0.88	1.02	4510-01-22	0	NA	NA	Inf	2	4510-01-22	1	1	0	0	0	FALSE	413	10	NA	NA	1.02	0	0	0	0	0	1	NA	Inf	FALSE	Hispanic or Latino	NEVER	48	Male	FALSE	TRUE	TRUE	FALSE	TRUE	M	1	non-black
371	OUTPATIENT	High	Final result	1.29	4510-02-18	4510-02-18	Yes	CREATININE	1.29	1.02	4510-01-22	0	NA	NA	Inf	2	4510-01-22	1	1	0	0	0	FALSE	413	10	NA	NA	1.02	0	0	0	0	0	1	NA	Inf	FALSE	Hispanic or Latino	NEVER	48	Male	FALSE	TRUE	TRUE	FALSE	TRUE	M	1	non-black
372	OUTPATIENT	*Unspecified	Final result	1.02	4510-01-22	4510-01-22	Yes	CREATININE	1.02	1.02	4510-01-22	0	NA	NA	Inf	2	4510-01-22	1	1	0	0	0	FALSE	413	10	NA	NA	1.02	0	0	0	0	0	1	NA	Inf	FALSE	Hispanic or Latino	NEVER	48	Male	FALSE	TRUE	TRUE	FALSE	TRUE	M	1	non-black
373	OUTPATIENT	Low	Final result	0.59	4510-01-28	4510-01-28	Yes	CREATININE	0.59	1.05996	4510-01-26	0	NA	NA	Inf	10	4510-01-26	4	1	1	0	0	FALSE	301	7	1.4	NA	0.59	0	0	0	0	0	1	NA	Inf	FALSE	NOT Hispanic or Latino	NEVER	63	Male	FALSE	TRUE	FALSE	FALSE	FALSE	M	1	non-black
374	OUTPATIENT	Low	Final result	0.54	4510-01-31	4510-01-31	Yes	CREATININE	0.54	1.05996	4510-01-26	0	NA	NA	Inf	10	4510-01-26	4	1	1	0	0	FALSE	301	7	1.4	NA	0.59	0	0	0	0	0	1	NA	Inf	FALSE	NOT Hispanic or Latino	NEVER	63	Male	FALSE	TRUE	FALSE	FALSE	FALSE	M	1	non-black
375	OUTPATIENT	Low	Final result	0.59	4510-01-26	4510-01-26	Yes	CREATININE	0.59	1.05996	4510-01-26	0	NA	NA	Inf	10	4510-01-26	4	1	1	0	0	FALSE	301	7	1.4	NA	0.59	0	0	0	0	0	1	NA	Inf	FALSE	NOT Hispanic or Latino	NEVER	63	Male	FALSE	TRUE	FALSE	FALSE	FALSE	M	1	non-black
376	OUTPATIENT	Low	Final result	0.53	4510-01-29	4510-01-29	Yes	CREATININE	0.53	1.05996	4510-01-26	0	NA	NA	Inf	10	4510-01-26	4	1	1	0	0	FALSE	301	7	1.4	NA	0.59	0	0	0	0	0	1	NA	Inf	FALSE	NOT Hispanic or Latino	NEVER	63	Male	FALSE	TRUE	FALSE	FALSE	FALSE	M	1	non-black
377	OUTPATIENT	Low	Final result	0.53	4510-01-30	4510-01-30	Yes	CREATININE	0.53	1.05996	4510-01-26	0	NA	NA	Inf	10	4510-01-26	4	1	1	0	0	FALSE	301	7	1.4	NA	0.59	0	0	0	0	0	1	NA	Inf	FALSE	NOT Hispanic or Latino	NEVER	63	Male	FALSE	TRUE	FALSE	FALSE	FALSE	M	1	non-black
378	OUTPATIENT	Low	Final result	0.57	4510-01-27	4510-01-27	Yes	CREATININE	0.57	1.05996	4510-01-26	0	NA	NA	Inf	10	4510-01-26	4	1	1	0	0	FALSE	301	7	1.4	NA	0.59	0	0	0	0	0	1	NA	Inf	FALSE	NOT Hispanic or Latino	NEVER	63	Male	FALSE	TRUE	FALSE	FALSE	FALSE	M	1	non-black
379	OUTPATIENT	High	Final result	1.56	4510-02-21	4510-02-21	Yes	CREATININE	1.56	1.24349	4510-02-07	1	4510-01-25	4510-03-29	56	65	4510-02-07	14	1	1	5	4	FALSE	45	62	45	NA	1.27	1	1	0	0	1.49538e+09	9.17475	4510-01-24	-13	FALSE	NOT Hispanic or Latino	QUIT	65	Male	FALSE	FALSE	FALSE	FALSE	TRUE	M	1	non-black
380	OUTPATIENT	High	Final result	1.63	4510-03-06	4510-03-06	Yes	CREATININE	1.63	1.24349	4510-02-07	1	4510-01-25	4510-03-29	56	65	4510-02-07	14	1	1	5	4	FALSE	45	62	45	NA	1.27	1	1	0	0	1.49538e+09	9.17475	4510-01-24	-13	FALSE	NOT Hispanic or Latino	QUIT	65	Male	FALSE	FALSE	FALSE	FALSE	TRUE	M	1	non-black
381	OUTPATIENT	High	Final result	2.06	4510-03-08	4510-03-08	Yes	CREATININE	2.06	1.24349	4510-02-07	1	4510-01-25	4510-03-29	56	65	4510-02-07	14	1	1	5	4	FALSE	45	62	45	NA	1.27	1	1	0	0	1.49538e+09	9.17475	4510-01-24	-13	FALSE	NOT Hispanic or Latino	QUIT	65	Male	FALSE	FALSE	FALSE	FALSE	TRUE	M	1	non-black
382	OUTPATIENT	High	Final result	1.88	4510-03-07	4510-03-07	Yes	CREATININE	1.88	1.24349	4510-02-07	1	4510-01-25	4510-03-29	56	65	4510-02-07	14	1	1	5	4	FALSE	45	62	45	NA	1.27	1	1	0	0	1.49538e+09	9.17475	4510-01-24	-13	FALSE	NOT Hispanic or Latino	QUIT	65	Male	FALSE	FALSE	FALSE	FALSE	TRUE	M	1	non-black
383	OUTPATIENT	High	Final result	1.47	4510-02-16	4510-02-16	Yes	CREATININE	1.47	1.24349	4510-02-07	1	4510-01-25	4510-03-29	56	65	4510-02-07	14	1	1	5	4	FALSE	45	62	45	NA	1.27	1	1	0	0	1.49538e+09	9.17475	4510-01-24	-13	FALSE	NOT Hispanic or Latino	QUIT	65	Male	FALSE	FALSE	FALSE	FALSE	TRUE	M	1	non-black
384	OUTPATIENT	High	Final result	1.48	4510-02-15	4510-02-15	Yes	CREATININE	1.48	1.24349	4510-02-07	1	4510-01-25	4510-03-29	56	65	4510-02-07	14	1	1	5	4	FALSE	45	62	45	NA	1.27	1	1	0	0	1.49538e+09	9.17475	4510-01-24	-13	FALSE	NOT Hispanic or Latino	QUIT	65	Male	FALSE	FALSE	FALSE	FALSE	TRUE	M	1	non-black
385	OUTPATIENT	High	Final result	1.66	4510-02-27	4510-02-27	Yes	CREATININE	1.66	1.24349	4510-02-07	1	4510-01-25	4510-03-29	56	65	4510-02-07	14	1	1	5	4	FALSE	45	62	45	NA	1.27	1	1	0	0	1.49538e+09	9.17475	4510-01-24	-13	FALSE	NOT Hispanic or Latino	QUIT	65	Male	FALSE	FALSE	FALSE	FALSE	TRUE	M	1	non-black
386	OUTPATIENT	High	Final result	4.35	4510-03-23	4510-03-23	Yes	CREATININE	4.35	1.24349	4510-02-07	1	4510-01-25	4510-03-29	56	65	4510-02-07	14	1	1	5	4	FALSE	45	62	45	NA	1.27	1	1	0	0	1.49538e+09	9.17475	4510-01-24	-13	FALSE	NOT Hispanic or Latino	QUIT	65	Male	FALSE	FALSE	FALSE	FALSE	TRUE	M	1	non-black
387	OUTPATIENT	High	Final result	4.42	4510-03-26	4510-03-26	Yes	CREATININE	4.42	1.24349	4510-02-07	1	4510-01-25	4510-03-29	56	65	4510-02-07	14	1	1	5	4	FALSE	45	62	45	NA	1.27	1	1	0	0	1.49538e+09	9.17475	4510-01-24	-13	FALSE	NOT Hispanic or Latino	QUIT	65	Male	FALSE	FALSE	FALSE	FALSE	TRUE	M	1	non-black
388	OUTPATIENT	High	Final result	1.41	4510-03-05	4510-03-05	Yes	CREATININE	1.41	1.24349	4510-02-07	1	4510-01-25	4510-03-29	56	65	4510-02-07	14	1	1	5	4	FALSE	45	62	45	NA	1.27	1	1	0	0	1.49538e+09	9.17475	4510-01-24	-13	FALSE	NOT Hispanic or Latino	QUIT	65	Male	FALSE	FALSE	FALSE	FALSE	TRUE	M	1	non-black
389	OUTPATIENT	High	Final result	1.89	4510-03-11	4510-03-11	Yes	CREATININE	1.89	1.24349	4510-02-07	1	4510-01-25	4510-03-29	56	65	4510-02-07	14	1	1	5	4	FALSE	45	62	45	NA	1.27	1	1	0	0	1.49538e+09	9.17475	4510-01-24	-13	FALSE	NOT Hispanic or Latino	QUIT	65	Male	FALSE	FALSE	FALSE	FALSE	TRUE	M	1	non-black
390	OUTPATIENT	High	Final result	2.24	4510-02-12	4510-02-12	Yes	CREATININE	2.24	1.24349	4510-02-07	1	4510-01-25	4510-03-29	56	65	4510-02-07	14	1	1	5	4	FALSE	45	62	45	NA	1.27	1	1	0	0	1.49538e+09	9.17475	4510-01-24	-13	FALSE	NOT Hispanic or Latino	QUIT	65	Male	FALSE	FALSE	FALSE	FALSE	TRUE	M	1	non-black
391	OUTPATIENT	High	Final result	3.66	4510-03-20	4510-03-20	Yes	CREATININE	3.66	1.24349	4510-02-07	1	4510-01-25	4510-03-29	56	65	4510-02-07	14	1	1	5	4	FALSE	45	62	45	NA	1.27	1	1	0	0	1.49538e+09	9.17475	4510-01-24	-13	FALSE	NOT Hispanic or Latino	QUIT	65	Male	FALSE	FALSE	FALSE	FALSE	TRUE	M	1	non-black
392	OUTPATIENT	*Unspecified	Final result	1.19	4510-03-12	4510-03-12	Yes	CREATININE	1.19	1.24349	4510-02-07	1	4510-01-25	4510-03-29	56	65	4510-02-07	14	1	1	5	4	FALSE	45	62	45	NA	1.27	1	1	0	0	1.49538e+09	9.17475	4510-01-24	-13	FALSE	NOT Hispanic or Latino	QUIT	65	Male	FALSE	FALSE	FALSE	FALSE	TRUE	M	1	non-black
393	OUTPATIENT	High	Final result	2.76	4510-03-14	4510-03-14	Yes	CREATININE	2.76	1.24349	4510-02-07	1	4510-01-25	4510-03-29	56	65	4510-02-07	14	1	1	5	4	FALSE	45	62	45	NA	1.27	1	1	0	0	1.49538e+09	9.17475	4510-01-24	-13	FALSE	NOT Hispanic or Latino	QUIT	65	Male	FALSE	FALSE	FALSE	FALSE	TRUE	M	1	non-black
394	OUTPATIENT	High	Final result	1.58	4510-02-15	4510-02-15	Yes	CREATININE	1.58	1.24349	4510-02-07	1	4510-01-25	4510-03-29	56	65	4510-02-07	14	1	1	5	4	FALSE	45	62	45	NA	1.27	1	1	0	0	1.49538e+09	9.17475	4510-01-24	-13	FALSE	NOT Hispanic or Latino	QUIT	65	Male	FALSE	FALSE	FALSE	FALSE	TRUE	M	1	non-black
395	OUTPATIENT	High	Final result	1.94	4510-02-13	4510-02-13	Yes	CREATININE	1.94	1.24349	4510-02-07	1	4510-01-25	4510-03-29	56	65	4510-02-07	14	1	1	5	4	FALSE	45	62	45	NA	1.27	1	1	0	0	1.49538e+09	9.17475	4510-01-24	-13	FALSE	NOT Hispanic or Latino	QUIT	65	Male	FALSE	FALSE	FALSE	FALSE	TRUE	M	1	non-black
396	OUTPATIENT	*Unspecified	Final result	1.3	4510-02-08	4510-02-08	Yes	CREATININE	1.3	1.24349	4510-02-07	1	4510-01-25	4510-03-29	56	65	4510-02-07	14	1	1	5	4	FALSE	45	62	45	NA	1.27	1	1	0	0	1.49538e+09	9.17475	4510-01-24	-13	FALSE	NOT Hispanic or Latino	QUIT	65	Male	FALSE	FALSE	FALSE	FALSE	TRUE	M	1	non-black
397	OUTPATIENT	Low	Final result	0.52	4510-03-28	4510-03-28	Yes	CREATININE	0.52	1.24349	4510-02-07	1	4510-01-25	4510-03-29	56	65	4510-02-07	14	1	1	5	4	FALSE	45	62	45	NA	1.27	1	1	0	0	1.49538e+09	9.17475	4510-01-24	-13	FALSE	NOT Hispanic or Latino	QUIT	65	Male	FALSE	FALSE	FALSE	FALSE	TRUE	M	1	non-black
398	OUTPATIENT	High	Final result	2.09	4510-03-10	4510-03-10	Yes	CREATININE	2.09	1.24349	4510-02-07	1	4510-01-25	4510-03-29	56	65	4510-02-07	14	1	1	5	4	FALSE	45	62	45	NA	1.27	1	1	0	0	1.49538e+09	9.17475	4510-01-24	-13	FALSE	NOT Hispanic or Latino	QUIT	65	Male	FALSE	FALSE	FALSE	FALSE	TRUE	M	1	non-black
399	OUTPATIENT	High	Final result	2.32	4510-03-16	4510-03-16	Yes	CREATININE	2.32	1.24349	4510-02-07	1	4510-01-25	4510-03-29	56	65	4510-02-07	14	1	1	5	4	FALSE	45	62	45	NA	1.27	1	1	0	0	1.49538e+09	9.17475	4510-01-24	-13	FALSE	NOT Hispanic or Latino	QUIT	65	Male	FALSE	FALSE	FALSE	FALSE	TRUE	M	1	non-black
400	OUTPATIENT	High	Final result	1.5	4510-02-15	4510-02-15	Yes	CREATININE	1.5	1.24349	4510-02-07	1	4510-01-25	4510-03-29	56	65	4510-02-07	14	1	1	5	4	FALSE	45	62	45	NA	1.27	1	1	0	0	1.49538e+09	9.17475	4510-01-24	-13	FALSE	NOT Hispanic or Latino	QUIT	65	Male	FALSE	FALSE	FALSE	FALSE	TRUE	M	1	non-black
401	OUTPATIENT	High	Final result	2.05	4510-02-13	4510-02-13	Yes	CREATININE	2.05	1.24349	4510-02-07	1	4510-01-25	4510-03-29	56	65	4510-02-07	14	1	1	5	4	FALSE	45	62	45	NA	1.27	1	1	0	0	1.49538e+09	9.17475	4510-01-24	-13	FALSE	NOT Hispanic or Latino	QUIT	65	Male	FALSE	FALSE	FALSE	FALSE	TRUE	M	1	non-black
402	OUTPATIENT	High	Final result	2.93	4510-03-17	4510-03-17	Yes	CREATININE	2.93	1.24349	4510-02-07	1	4510-01-25	4510-03-29	56	65	4510-02-07	14	1	1	5	4	FALSE	45	62	45	NA	1.27	1	1	0	0	1.49538e+09	9.17475	4510-01-24	-13	FALSE	NOT Hispanic or Latino	QUIT	65	Male	FALSE	FALSE	FALSE	FALSE	TRUE	M	1	non-black
403	OUTPATIENT	High	Final result	1.56	4510-03-04	4510-03-04	Yes	CREATININE	1.56	1.24349	4510-02-07	1	4510-01-25	4510-03-29	56	65	4510-02-07	14	1	1	5	4	FALSE	45	62	45	NA	1.27	1	1	0	0	1.49538e+09	9.17475	4510-01-24	-13	FALSE	NOT Hispanic or Latino	QUIT	65	Male	FALSE	FALSE	FALSE	FALSE	TRUE	M	1	non-black
404	OUTPATIENT	High	Final result	4.34	4510-03-24	4510-03-24	Yes	CREATININE	4.34	1.24349	4510-02-07	1	4510-01-25	4510-03-29	56	65	4510-02-07	14	1	1	5	4	FALSE	45	62	45	NA	1.27	1	1	0	0	1.49538e+09	9.17475	4510-01-24	-13	FALSE	NOT Hispanic or Latino	QUIT	65	Male	FALSE	FALSE	FALSE	FALSE	TRUE	M	1	non-black
405	OUTPATIENT	High	Final result	2.48	4510-03-18	4510-03-18	Yes	CREATININE	2.48	1.24349	4510-02-07	1	4510-01-25	4510-03-29	56	65	4510-02-07	14	1	1	5	4	FALSE	45	62	45	NA	1.27	1	1	0	0	1.49538e+09	9.17475	4510-01-24	-13	FALSE	NOT Hispanic or Latino	QUIT	65	Male	FALSE	FALSE	FALSE	FALSE	TRUE	M	1	non-black
406	OUTPATIENT	High	Final result	4.69	4510-03-29	4510-03-29	Yes	CREATININE	4.69	1.24349	4510-02-07	1	4510-01-25	4510-03-29	56	65	4510-02-07	14	1	1	5	4	FALSE	45	62	45	NA	1.27	1	1	0	0	1.49538e+09	9.17475	4510-01-24	-13	FALSE	NOT Hispanic or Latino	QUIT	65	Male	FALSE	FALSE	FALSE	FALSE	TRUE	M	1	non-black
407	OUTPATIENT	High	Final result	2.11	4510-02-11	4510-02-11	Yes	CREATININE	2.11	1.24349	4510-02-07	1	4510-01-25	4510-03-29	56	65	4510-02-07	14	1	1	5	4	FALSE	45	62	45	NA	1.27	1	1	0	0	1.49538e+09	9.17475	4510-01-24	-13	FALSE	NOT Hispanic or Latino	QUIT	65	Male	FALSE	FALSE	FALSE	FALSE	TRUE	M	1	non-black
408	OUTPATIENT	High	Final result	1.5	4510-03-01	4510-03-01	Yes	CREATININE	1.5	1.24349	4510-02-07	1	4510-01-25	4510-03-29	56	65	4510-02-07	14	1	1	5	4	FALSE	45	62	45	NA	1.27	1	1	0	0	1.49538e+09	9.17475	4510-01-24	-13	FALSE	NOT Hispanic or Latino	QUIT	65	Male	FALSE	FALSE	FALSE	FALSE	TRUE	M	1	non-black
409	OUTPATIENT	High	Final result	4.64	4510-03-28	4510-03-28	Yes	CREATININE	4.64	1.24349	4510-02-07	1	4510-01-25	4510-03-29	56	65	4510-02-07	14	1	1	5	4	FALSE	45	62	45	NA	1.27	1	1	0	0	1.49538e+09	9.17475	4510-01-24	-13	FALSE	NOT Hispanic or Latino	QUIT	65	Male	FALSE	FALSE	FALSE	FALSE	TRUE	M	1	non-black
410	OUTPATIENT	High	Final result	4.31	4510-03-24	4510-03-24	Yes	CREATININE	4.31	1.24349	4510-02-07	1	4510-01-25	4510-03-29	56	65	4510-02-07	14	1	1	5	4	FALSE	45	62	45	NA	1.27	1	1	0	0	1.49538e+09	9.17475	4510-01-24	-13	FALSE	NOT Hispanic or Latino	QUIT	65	Male	FALSE	FALSE	FALSE	FALSE	TRUE	M	1	non-black
411	OUTPATIENT	High	Final result	4.29	4510-03-24	4510-03-24	Yes	CREATININE	4.29	1.24349	4510-02-07	1	4510-01-25	4510-03-29	56	65	4510-02-07	14	1	1	5	4	FALSE	45	62	45	NA	1.27	1	1	0	0	1.49538e+09	9.17475	4510-01-24	-13	FALSE	NOT Hispanic or Latino	QUIT	65	Male	FALSE	FALSE	FALSE	FALSE	TRUE	M	1	non-black
412	OUTPATIENT	High	Final result	1.42	4510-02-25	4510-02-25	Yes	CREATININE	1.42	1.24349	4510-02-07	1	4510-01-25	4510-03-29	56	65	4510-02-07	14	1	1	5	4	FALSE	45	62	45	NA	1.27	1	1	0	0	1.49538e+09	9.17475	4510-01-24	-13	FALSE	NOT Hispanic or Latino	QUIT	65	Male	FALSE	FALSE	FALSE	FALSE	TRUE	M	1	non-black
413	OUTPATIENT	High	Final result	4.58	4510-03-28	4510-03-28	Yes	CREATININE	4.58	1.24349	4510-02-07	1	4510-01-25	4510-03-29	56	65	4510-02-07	14	1	1	5	4	FALSE	45	62	45	NA	1.27	1	1	0	0	1.49538e+09	9.17475	4510-01-24	-13	FALSE	NOT Hispanic or Latino	QUIT	65	Male	FALSE	FALSE	FALSE	FALSE	TRUE	M	1	non-black
414	OUTPATIENT	High	Final result	1.87	4510-03-09	4510-03-09	Yes	CREATININE	1.87	1.24349	4510-02-07	1	4510-01-25	4510-03-29	56	65	4510-02-07	14	1	1	5	4	FALSE	45	62	45	NA	1.27	1	1	0	0	1.49538e+09	9.17475	4510-01-24	-13	FALSE	NOT Hispanic or Latino	QUIT	65	Male	FALSE	FALSE	FALSE	FALSE	TRUE	M	1	non-black
415	OUTPATIENT	High	Final result	1.47	4510-02-18	4510-02-18	Yes	CREATININE	1.47	1.24349	4510-02-07	1	4510-01-25	4510-03-29	56	65	4510-02-07	14	1	1	5	4	FALSE	45	62	45	NA	1.27	1	1	0	0	1.49538e+09	9.17475	4510-01-24	-13	FALSE	NOT Hispanic or Latino	QUIT	65	Male	FALSE	FALSE	FALSE	FALSE	TRUE	M	1	non-black
416	OUTPATIENT	High	Final result	1.55	4510-02-22	4510-02-22	Yes	CREATININE	1.55	1.24349	4510-02-07	1	4510-01-25	4510-03-29	56	65	4510-02-07	14	1	1	5	4	FALSE	45	62	45	NA	1.27	1	1	0	0	1.49538e+09	9.17475	4510-01-24	-13	FALSE	NOT Hispanic or Latino	QUIT	65	Male	FALSE	FALSE	FALSE	FALSE	TRUE	M	1	non-black
417	OUTPATIENT	High	Final result	1.66	4510-02-28	4510-02-28	Yes	CREATININE	1.66	1.24349	4510-02-07	1	4510-01-25	4510-03-29	56	65	4510-02-07	14	1	1	5	4	FALSE	45	62	45	NA	1.27	1	1	0	0	1.49538e+09	9.17475	4510-01-24	-13	FALSE	NOT Hispanic or Latino	QUIT	65	Male	FALSE	FALSE	FALSE	FALSE	TRUE	M	1	non-black
418	OUTPATIENT	High	Final result	4.45	4510-03-26	4510-03-26	Yes	CREATININE	4.45	1.24349	4510-02-07	1	4510-01-25	4510-03-29	56	65	4510-02-07	14	1	1	5	4	FALSE	45	62	45	NA	1.27	1	1	0	0	1.49538e+09	9.17475	4510-01-24	-13	FALSE	NOT Hispanic or Latino	QUIT	65	Male	FALSE	FALSE	FALSE	FALSE	TRUE	M	1	non-black
419	OUTPATIENT	High	Final result	1.5	4510-03-04	4510-03-04	Yes	CREATININE	1.5	1.24349	4510-02-07	1	4510-01-25	4510-03-29	56	65	4510-02-07	14	1	1	5	4	FALSE	45	62	45	NA	1.27	1	1	0	0	1.49538e+09	9.17475	4510-01-24	-13	FALSE	NOT Hispanic or Latino	QUIT	65	Male	FALSE	FALSE	FALSE	FALSE	TRUE	M	1	non-black
420	OUTPATIENT	High	Final result	1.79	4510-02-10	4510-02-10	Yes	CREATININE	1.79	1.24349	4510-02-07	1	4510-01-25	4510-03-29	56	65	4510-02-07	14	1	1	5	4	FALSE	45	62	45	NA	1.27	1	1	0	0	1.49538e+09	9.17475	4510-01-24	-13	FALSE	NOT Hispanic or Latino	QUIT	65	Male	FALSE	FALSE	FALSE	FALSE	TRUE	M	1	non-black
421	OUTPATIENT	High	Final result	1.56	4510-02-26	4510-02-26	Yes	CREATININE	1.56	1.24349	4510-02-07	1	4510-01-25	4510-03-29	56	65	4510-02-07	14	1	1	5	4	FALSE	45	62	45	NA	1.27	1	1	0	0	1.49538e+09	9.17475	4510-01-24	-13	FALSE	NOT Hispanic or Latino	QUIT	65	Male	FALSE	FALSE	FALSE	FALSE	TRUE	M	1	non-black
422	OUTPATIENT	High	Final result	4.6	4510-03-27	4510-03-27	Yes	CREATININE	4.6	1.24349	4510-02-07	1	4510-01-25	4510-03-29	56	65	4510-02-07	14	1	1	5	4	FALSE	45	62	45	NA	1.27	1	1	0	0	1.49538e+09	9.17475	4510-01-24	-13	FALSE	NOT Hispanic or Latino	QUIT	65	Male	FALSE	FALSE	FALSE	FALSE	TRUE	M	1	non-black
423	OUTPATIENT	High	Final result	4.33	4510-03-25	4510-03-25	Yes	CREATININE	4.33	1.24349	4510-02-07	1	4510-01-25	4510-03-29	56	65	4510-02-07	14	1	1	5	4	FALSE	45	62	45	NA	1.27	1	1	0	0	1.49538e+09	9.17475	4510-01-24	-13	FALSE	NOT Hispanic or Latino	QUIT	65	Male	FALSE	FALSE	FALSE	FALSE	TRUE	M	1	non-black
424	OUTPATIENT	High	Final result	4.38	4510-03-25	4510-03-25	Yes	CREATININE	4.38	1.24349	4510-02-07	1	4510-01-25	4510-03-29	56	65	4510-02-07	14	1	1	5	4	FALSE	45	62	45	NA	1.27	1	1	0	0	1.49538e+09	9.17475	4510-01-24	-13	FALSE	NOT Hispanic or Latino	QUIT	65	Male	FALSE	FALSE	FALSE	FALSE	TRUE	M	1	non-black
425	OUTPATIENT	High	Final result	4.13	4510-03-22	4510-03-22	Yes	CREATININE	4.13	1.24349	4510-02-07	1	4510-01-25	4510-03-29	56	65	4510-02-07	14	1	1	5	4	FALSE	45	62	45	NA	1.27	1	1	0	0	1.49538e+09	9.17475	4510-01-24	-13	FALSE	NOT Hispanic or Latino	QUIT	65	Male	FALSE	FALSE	FALSE	FALSE	TRUE	M	1	non-black
426	OUTPATIENT	High	Final result	4.58	4510-03-26	4510-03-26	Yes	CREATININE	4.58	1.24349	4510-02-07	1	4510-01-25	4510-03-29	56	65	4510-02-07	14	1	1	5	4	FALSE	45	62	45	NA	1.27	1	1	0	0	1.49538e+09	9.17475	4510-01-24	-13	FALSE	NOT Hispanic or Latino	QUIT	65	Male	FALSE	FALSE	FALSE	FALSE	TRUE	M	1	non-black
427	OUTPATIENT	High	Final result	4.43	4510-03-23	4510-03-24	Yes	CREATININE	4.43	1.24349	4510-02-07	1	4510-01-25	4510-03-29	56	65	4510-02-07	14	1	1	5	4	FALSE	45	62	45	NA	1.27	1	1	0	0	1.49538e+09	9.17475	4510-01-24	-13	FALSE	NOT Hispanic or Latino	QUIT	65	Male	FALSE	FALSE	FALSE	FALSE	TRUE	M	1	non-black
428	OUTPATIENT	High	Final result	1.46	4510-02-18	4510-02-18	Yes	CREATININE	1.46	1.24349	4510-02-07	1	4510-01-25	4510-03-29	56	65	4510-02-07	14	1	1	5	4	FALSE	45	62	45	NA	1.27	1	1	0	0	1.49538e+09	9.17475	4510-01-24	-13	FALSE	NOT Hispanic or Latino	QUIT	65	Male	FALSE	FALSE	FALSE	FALSE	TRUE	M	1	non-black
429	OUTPATIENT	High	Final result	4.37	4510-03-25	4510-03-25	Yes	CREATININE	4.37	1.24349	4510-02-07	1	4510-01-25	4510-03-29	56	65	4510-02-07	14	1	1	5	4	FALSE	45	62	45	NA	1.27	1	1	0	0	1.49538e+09	9.17475	4510-01-24	-13	FALSE	NOT Hispanic or Latino	QUIT	65	Male	FALSE	FALSE	FALSE	FALSE	TRUE	M	1	non-black
430	OUTPATIENT	High	Final result	3.94	4510-03-21	4510-03-21	Yes	CREATININE	3.94	1.24349	4510-02-07	1	4510-01-25	4510-03-29	56	65	4510-02-07	14	1	1	5	4	FALSE	45	62	45	NA	1.27	1	1	0	0	1.49538e+09	9.17475	4510-01-24	-13	FALSE	NOT Hispanic or Latino	QUIT	65	Male	FALSE	FALSE	FALSE	FALSE	TRUE	M	1	non-black
431	OUTPATIENT	High	Final result	4.26	4510-03-23	4510-03-23	Yes	CREATININE	4.26	1.24349	4510-02-07	1	4510-01-25	4510-03-29	56	65	4510-02-07	14	1	1	5	4	FALSE	45	62	45	NA	1.27	1	1	0	0	1.49538e+09	9.17475	4510-01-24	-13	FALSE	NOT Hispanic or Latino	QUIT	65	Male	FALSE	FALSE	FALSE	FALSE	TRUE	M	1	non-black
432	OUTPATIENT	High	Final result	3.11	4510-03-19	4510-03-19	Yes	CREATININE	3.11	1.24349	4510-02-07	1	4510-01-25	4510-03-29	56	65	4510-02-07	14	1	1	5	4	FALSE	45	62	45	NA	1.27	1	1	0	0	1.49538e+09	9.17475	4510-01-24	-13	FALSE	NOT Hispanic or Latino	QUIT	65	Male	FALSE	FALSE	FALSE	FALSE	TRUE	M	1	non-black
433	OUTPATIENT	*Unspecified	Final result	1.27	4510-02-07	4510-02-07	Yes	CREATININE	1.27	1.24349	4510-02-07	1	4510-01-25	4510-03-29	56	65	4510-02-07	14	1	1	5	4	FALSE	45	62	45	NA	1.27	1	1	0	0	1.49538e+09	9.17475	4510-01-24	-13	FALSE	NOT Hispanic or Latino	QUIT	65	Male	FALSE	FALSE	FALSE	FALSE	TRUE	M	1	non-black
434	OUTPATIENT	High	Final result	1.55	4510-02-14	4510-02-14	Yes	CREATININE	1.55	1.24349	4510-02-07	1	4510-01-25	4510-03-29	56	65	4510-02-07	14	1	1	5	4	FALSE	45	62	45	NA	1.27	1	1	0	0	1.49538e+09	9.17475	4510-01-24	-13	FALSE	NOT Hispanic or Latino	QUIT	65	Male	FALSE	FALSE	FALSE	FALSE	TRUE	M	1	non-black
435	OUTPATIENT	High	Final result	1.51	4510-02-17	4510-02-17	Yes	CREATININE	1.51	1.24349	4510-02-07	1	4510-01-25	4510-03-29	56	65	4510-02-07	14	1	1	5	4	FALSE	45	62	45	NA	1.27	1	1	0	0	1.49538e+09	9.17475	4510-01-24	-13	FALSE	NOT Hispanic or Latino	QUIT	65	Male	FALSE	FALSE	FALSE	FALSE	TRUE	M	1	non-black
436	OUTPATIENT	High	Final result	1.41	4510-02-16	4510-02-16	Yes	CREATININE	1.41	1.24349	4510-02-07	1	4510-01-25	4510-03-29	56	65	4510-02-07	14	1	1	5	4	FALSE	45	62	45	NA	1.27	1	1	0	0	1.49538e+09	9.17475	4510-01-24	-13	FALSE	NOT Hispanic or Latino	QUIT	65	Male	FALSE	FALSE	FALSE	FALSE	TRUE	M	1	non-black
437	OUTPATIENT	High	Final result	1.39	4510-03-03	4510-03-03	Yes	CREATININE	1.39	1.24349	4510-02-07	1	4510-01-25	4510-03-29	56	65	4510-02-07	14	1	1	5	4	FALSE	45	62	45	NA	1.27	1	1	0	0	1.49538e+09	9.17475	4510-01-24	-13	FALSE	NOT Hispanic or Latino	QUIT	65	Male	FALSE	FALSE	FALSE	FALSE	TRUE	M	1	non-black
438	OUTPATIENT	High	Final result	1.79	4510-02-14	4510-02-14	Yes	CREATININE	1.79	1.24349	4510-02-07	1	4510-01-25	4510-03-29	56	65	4510-02-07	14	1	1	5	4	FALSE	45	62	45	NA	1.27	1	1	0	0	1.49538e+09	9.17475	4510-01-24	-13	FALSE	NOT Hispanic or Latino	QUIT	65	Male	FALSE	FALSE	FALSE	FALSE	TRUE	M	1	non-black
439	OUTPATIENT	High	Final result	1.51	4510-02-19	4510-02-19	Yes	CREATININE	1.51	1.24349	4510-02-07	1	4510-01-25	4510-03-29	56	65	4510-02-07	14	1	1	5	4	FALSE	45	62	45	NA	1.27	1	1	0	0	1.49538e+09	9.17475	4510-01-24	-13	FALSE	NOT Hispanic or Latino	QUIT	65	Male	FALSE	FALSE	FALSE	FALSE	TRUE	M	1	non-black
440	OUTPATIENT	*Unspecified	Final result	1.2	4510-03-02	4510-03-02	Yes	CREATININE	1.2	1.24349	4510-02-07	1	4510-01-25	4510-03-29	56	65	4510-02-07	14	1	1	5	4	FALSE	45	62	45	NA	1.27	1	1	0	0	1.49538e+09	9.17475	4510-01-24	-13	FALSE	NOT Hispanic or Latino	QUIT	65	Male	FALSE	FALSE	FALSE	FALSE	TRUE	M	1	non-black
441	OUTPATIENT	High	Final result	1.49	4510-02-23	4510-02-23	Yes	CREATININE	1.49	1.24349	4510-02-07	1	4510-01-25	4510-03-29	56	65	4510-02-07	14	1	1	5	4	FALSE	45	62	45	NA	1.27	1	1	0	0	1.49538e+09	9.17475	4510-01-24	-13	FALSE	NOT Hispanic or Latino	QUIT	65	Male	FALSE	FALSE	FALSE	FALSE	TRUE	M	1	non-black
442	OUTPATIENT	High	Final result	1.45	4510-02-09	4510-02-09	Yes	CREATININE	1.45	1.24349	4510-02-07	1	4510-01-25	4510-03-29	56	65	4510-02-07	14	1	1	5	4	FALSE	45	62	45	NA	1.27	1	1	0	0	1.49538e+09	9.17475	4510-01-24	-13	FALSE	NOT Hispanic or Latino	QUIT	65	Male	FALSE	FALSE	FALSE	FALSE	TRUE	M	1	non-black
443	OUTPATIENT	High	Final result	2.38	4510-02-11	4510-02-11	Yes	CREATININE	2.38	1.24349	4510-02-07	1	4510-01-25	4510-03-29	56	65	4510-02-07	14	1	1	5	4	FALSE	45	62	45	NA	1.27	1	1	0	0	1.49538e+09	9.17475	4510-01-24	-13	FALSE	NOT Hispanic or Latino	QUIT	65	Male	FALSE	FALSE	FALSE	FALSE	TRUE	M	1	non-black
444	OUTPATIENT	High	Final result	3.24	4510-03-15	4510-03-15	Yes	CREATININE	3.24	1.24349	4510-02-07	1	4510-01-25	4510-03-29	56	65	4510-02-07	14	1	1	5	4	FALSE	45	62	45	NA	1.27	1	1	0	0	1.49538e+09	9.17475	4510-01-24	-13	FALSE	NOT Hispanic or Latino	QUIT	65	Male	FALSE	FALSE	FALSE	FALSE	TRUE	M	1	non-black
445	OUTPATIENT	High	Final result	1.43	4510-03-11	4510-03-11	Yes	CREATININE	1.43	1.24349	4510-02-07	1	4510-01-25	4510-03-29	56	65	4510-02-07	14	1	1	5	4	FALSE	45	62	45	NA	1.27	1	1	0	0	1.49538e+09	9.17475	4510-01-24	-13	FALSE	NOT Hispanic or Latino	QUIT	65	Male	FALSE	FALSE	FALSE	FALSE	TRUE	M	1	non-black
446	OUTPATIENT	High	Final result	2.07	4510-03-13	4510-03-13	Yes	CREATININE	2.07	1.24349	4510-02-07	1	4510-01-25	4510-03-29	56	65	4510-02-07	14	1	1	5	4	FALSE	45	62	45	NA	1.27	1	1	0	0	1.49538e+09	9.17475	4510-01-24	-13	FALSE	NOT Hispanic or Latino	QUIT	65	Male	FALSE	FALSE	FALSE	FALSE	TRUE	M	1	non-black
447	OUTPATIENT	High	Final result	1.91	4510-03-09	4510-03-09	Yes	CREATININE	1.91	1.24349	4510-02-07	1	4510-01-25	4510-03-29	56	65	4510-02-07	14	1	1	5	4	FALSE	45	62	45	NA	1.27	1	1	0	0	1.49538e+09	9.17475	4510-01-24	-13	FALSE	NOT Hispanic or Latino	QUIT	65	Male	FALSE	FALSE	FALSE	FALSE	TRUE	M	1	non-black
448	OUTPATIENT	High	Final result	1.5	4510-02-20	4510-02-20	Yes	CREATININE	1.5	1.24349	4510-02-07	1	4510-01-25	4510-03-29	56	65	4510-02-07	14	1	1	5	4	FALSE	45	62	45	NA	1.27	1	1	0	0	1.49538e+09	9.17475	4510-01-24	-13	FALSE	NOT Hispanic or Latino	QUIT	65	Male	FALSE	FALSE	FALSE	FALSE	TRUE	M	1	non-black
449	OUTPATIENT	High	Final result	1.43	4510-02-24	4510-02-24	Yes	CREATININE	1.43	1.24349	4510-02-07	1	4510-01-25	4510-03-29	56	65	4510-02-07	14	1	1	5	4	FALSE	45	62	45	NA	1.27	1	1	0	0	1.49538e+09	9.17475	4510-01-24	-13	FALSE	NOT Hispanic or Latino	QUIT	65	Male	FALSE	FALSE	FALSE	FALSE	TRUE	M	1	non-black
450	OUTPATIENT	High	Final result	1.99	4510-02-13	4510-02-13	Yes	CREATININE	1.99	1.99	4510-02-11	1	4510-01-28	4510-02-16	Inf	21	4510-02-11	15	1	1	4	2	FALSE	229	97	0.8	NA	2.45	1	1	0	0	3.27563e+06	6.5153	4510-01-27	-14	FALSE	NOT Hispanic or Latino	NEVER	87	Male	FALSE	TRUE	FALSE	FALSE	FALSE	M	1	non-black
451	OUTPATIENT	High	Final result	3.84	4510-02-16	4510-02-16	Yes	CREATININE	3.84	1.99	4510-02-11	1	4510-01-28	4510-02-16	Inf	21	4510-02-11	15	1	1	4	2	FALSE	229	97	0.8	NA	2.45	1	1	0	0	3.27563e+06	6.5153	4510-01-27	-14	FALSE	NOT Hispanic or Latino	NEVER	87	Male	FALSE	TRUE	FALSE	FALSE	FALSE	M	1	non-black
452	OUTPATIENT	High	Final result	2.45	4510-02-11	4510-02-11	Yes	CREATININE	2.45	1.99	4510-02-11	1	4510-01-28	4510-02-16	Inf	21	4510-02-11	15	1	1	4	2	FALSE	229	97	0.8	NA	2.45	1	1	0	0	3.27563e+06	6.5153	4510-01-27	-14	FALSE	NOT Hispanic or Latino	NEVER	87	Male	FALSE	TRUE	FALSE	FALSE	FALSE	M	1	non-black
453	OUTPATIENT	High	Preliminary result	2.09	4510-02-12	4510-02-12	No	CREATININE	2.09	1.99	4510-02-11	1	4510-01-28	4510-02-16	Inf	21	4510-02-11	15	1	1	4	2	FALSE	229	97	0.8	NA	2.45	1	1	0	0	3.27563e+06	6.5153	4510-01-27	-14	FALSE	NOT Hispanic or Latino	NEVER	87	Male	FALSE	TRUE	FALSE	FALSE	FALSE	M	1	non-black
454	OUTPATIENT	High	Final result	2.23	4510-02-14	4510-02-14	Yes	CREATININE	2.23	1.99	4510-02-11	1	4510-01-28	4510-02-16	Inf	21	4510-02-11	15	1	1	4	2	FALSE	229	97	0.8	NA	2.45	1	1	0	0	3.27563e+06	6.5153	4510-01-27	-14	FALSE	NOT Hispanic or Latino	NEVER	87	Male	FALSE	TRUE	FALSE	FALSE	FALSE	M	1	non-black
455	OUTPATIENT	High	Final result	2.59	4510-02-14	4510-02-14	Yes	CREATININE	2.59	1.99	4510-02-11	1	4510-01-28	4510-02-16	Inf	21	4510-02-11	15	1	1	4	2	FALSE	229	97	0.8	NA	2.45	1	1	0	0	3.27563e+06	6.5153	4510-01-27	-14	FALSE	NOT Hispanic or Latino	NEVER	87	Male	FALSE	TRUE	FALSE	FALSE	FALSE	M	1	non-black
456	OUTPATIENT	High	Final result	1.48	4510-06-26	4510-06-26	Yes	CREATININE	1.48	0.79	4510-02-20	0	NA	NA	Inf	26	4510-02-20	24	1	1	0	0	FALSE	320	27	1.8	NA	0.86	0	0	0	0	0	1	NA	Inf	FALSE	Hispanic or Latino	QUIT	59	Female	FALSE	TRUE	FALSE	FALSE	FALSE	F	0.742	non-black
457	OUTPATIENT	*Unspecified	Final result	0.86	4510-02-20	4510-02-20	Yes	CREATININE	0.86	0.79	4510-02-20	0	NA	NA	Inf	26	4510-02-20	24	1	1	0	0	FALSE	320	27	1.8	NA	0.86	0	0	0	0	0	1	NA	Inf	FALSE	Hispanic or Latino	QUIT	59	Female	FALSE	TRUE	FALSE	FALSE	FALSE	F	0.742	non-black
458	OUTPATIENT	High	Final result	1.53	4510-06-14	4510-06-14	Yes	CREATININE	1.53	0.79	4510-02-20	0	NA	NA	Inf	26	4510-02-20	24	1	1	0	0	FALSE	320	27	1.8	NA	0.86	0	0	0	0	0	1	NA	Inf	FALSE	Hispanic or Latino	QUIT	59	Female	FALSE	TRUE	FALSE	FALSE	FALSE	F	0.742	non-black
459	OUTPATIENT	High	Final result	1.37	4510-06-15	4510-06-15	Yes	CREATININE	1.37	0.79	4510-02-20	0	NA	NA	Inf	26	4510-02-20	24	1	1	0	0	FALSE	320	27	1.8	NA	0.86	0	0	0	0	0	1	NA	Inf	FALSE	Hispanic or Latino	QUIT	59	Female	FALSE	TRUE	FALSE	FALSE	FALSE	F	0.742	non-black
460	OUTPATIENT	High	Final result	1.45	4510-06-16	4510-06-16	Yes	CREATININE	1.45	0.79	4510-02-20	0	NA	NA	Inf	26	4510-02-20	24	1	1	0	0	FALSE	320	27	1.8	NA	0.86	0	0	0	0	0	1	NA	Inf	FALSE	Hispanic or Latino	QUIT	59	Female	FALSE	TRUE	FALSE	FALSE	FALSE	F	0.742	non-black
461	OUTPATIENT	High	Final result	1.41	4510-06-20	4510-06-20	Yes	CREATININE	1.41	0.79	4510-02-20	0	NA	NA	Inf	26	4510-02-20	24	1	1	0	0	FALSE	320	27	1.8	NA	0.86	0	0	0	0	0	1	NA	Inf	FALSE	Hispanic or Latino	QUIT	59	Female	FALSE	TRUE	FALSE	FALSE	FALSE	F	0.742	non-black
462	OUTPATIENT	High	Final result	1.47	4510-06-12	4510-06-12	Yes	CREATININE	1.47	0.79	4510-02-20	0	NA	NA	Inf	26	4510-02-20	24	1	1	0	0	FALSE	320	27	1.8	NA	0.86	0	0	0	0	0	1	NA	Inf	FALSE	Hispanic or Latino	QUIT	59	Female	FALSE	TRUE	FALSE	FALSE	FALSE	F	0.742	non-black
463	OUTPATIENT	High	Final result	1.45	4510-06-17	4510-06-17	Yes	CREATININE	1.45	0.79	4510-02-20	0	NA	NA	Inf	26	4510-02-20	24	1	1	0	0	FALSE	320	27	1.8	NA	0.86	0	0	0	0	0	1	NA	Inf	FALSE	Hispanic or Latino	QUIT	59	Female	FALSE	TRUE	FALSE	FALSE	FALSE	F	0.742	non-black
464	OUTPATIENT	High	Final result	1.55	4510-06-13	4510-06-13	Yes	CREATININE	1.55	0.79	4510-02-20	0	NA	NA	Inf	26	4510-02-20	24	1	1	0	0	FALSE	320	27	1.8	NA	0.86	0	0	0	0	0	1	NA	Inf	FALSE	Hispanic or Latino	QUIT	59	Female	FALSE	TRUE	FALSE	FALSE	FALSE	F	0.742	non-black
465	OUTPATIENT	High	Final result	1.54	4510-06-18	4510-06-18	Yes	CREATININE	1.54	0.79	4510-02-20	0	NA	NA	Inf	26	4510-02-20	24	1	1	0	0	FALSE	320	27	1.8	NA	0.86	0	0	0	0	0	1	NA	Inf	FALSE	Hispanic or Latino	QUIT	59	Female	FALSE	TRUE	FALSE	FALSE	FALSE	F	0.742	non-black
466	OUTPATIENT	High	Final result	1.37	4510-06-19	4510-06-19	Yes	CREATININE	1.37	0.79	4510-02-20	0	NA	NA	Inf	26	4510-02-20	24	1	1	0	0	FALSE	320	27	1.8	NA	0.86	0	0	0	0	0	1	NA	Inf	FALSE	Hispanic or Latino	QUIT	59	Female	FALSE	TRUE	FALSE	FALSE	FALSE	F	0.742	non-black
467	OUTPATIENT	High	Final result	1.38	4510-07-20	4510-07-20	Yes	CREATININE	1.38	0.79	4510-02-20	0	NA	NA	Inf	26	4510-02-20	24	1	1	0	0	FALSE	320	27	1.8	NA	0.86	0	0	0	0	0	1	NA	Inf	FALSE	Hispanic or Latino	QUIT	59	Female	FALSE	TRUE	FALSE	FALSE	FALSE	F	0.742	non-black
468	OUTPATIENT	High	Final result	1.13	4510-07-22	4510-07-22	Yes	CREATININE	1.13	0.79	4510-02-20	0	NA	NA	Inf	26	4510-02-20	24	1	1	0	0	FALSE	320	27	1.8	NA	0.86	0	0	0	0	0	1	NA	Inf	FALSE	Hispanic or Latino	QUIT	59	Female	FALSE	TRUE	FALSE	FALSE	FALSE	F	0.742	non-black
469	OUTPATIENT	High	Final result	1.22	4510-07-23	4510-07-23	Yes	CREATININE	1.22	0.79	4510-02-20	0	NA	NA	Inf	26	4510-02-20	24	1	1	0	0	FALSE	320	27	1.8	NA	0.86	0	0	0	0	0	1	NA	Inf	FALSE	Hispanic or Latino	QUIT	59	Female	FALSE	TRUE	FALSE	FALSE	FALSE	F	0.742	non-black
470	OUTPATIENT	High	Final result	1.16	4510-07-21	4510-07-21	Yes	CREATININE	1.16	0.79	4510-02-20	0	NA	NA	Inf	26	4510-02-20	24	1	1	0	0	FALSE	320	27	1.8	NA	0.86	0	0	0	0	0	1	NA	Inf	FALSE	Hispanic or Latino	QUIT	59	Female	FALSE	TRUE	FALSE	FALSE	FALSE	F	0.742	non-black
471	OUTPATIENT	High	Final result	1.11	4511-01-09	4511-01-09	Yes	CREATININE	1.11	0.79	4510-02-20	0	NA	NA	Inf	26	4510-02-20	24	1	1	0	0	FALSE	320	27	1.8	NA	0.86	0	0	0	0	0	1	NA	Inf	FALSE	Hispanic or Latino	QUIT	59	Female	FALSE	TRUE	FALSE	FALSE	FALSE	F	0.742	non-black
472	OUTPATIENT	*Unspecified	Final result	1.08	4510-11-20	4510-11-20	Yes	CREATININE	1.08	0.79	4510-02-20	0	NA	NA	Inf	26	4510-02-20	24	1	1	0	0	FALSE	320	27	1.8	NA	0.86	0	0	0	0	0	1	NA	Inf	FALSE	Hispanic or Latino	QUIT	59	Female	FALSE	TRUE	FALSE	FALSE	FALSE	F	0.742	non-black
473	OUTPATIENT	High	Final result	1.26	4510-07-24	4510-07-24	Yes	CREATININE	1.26	0.79	4510-02-20	0	NA	NA	Inf	26	4510-02-20	24	1	1	0	0	FALSE	320	27	1.8	NA	0.86	0	0	0	0	0	1	NA	Inf	FALSE	Hispanic or Latino	QUIT	59	Female	FALSE	TRUE	FALSE	FALSE	FALSE	F	0.742	non-black
474	OUTPATIENT	*Unspecified	Final result	1.04	4510-11-24	4510-11-24	Yes	CREATININE	1.04	0.79	4510-02-20	0	NA	NA	Inf	26	4510-02-20	24	1	1	0	0	FALSE	320	27	1.8	NA	0.86	0	0	0	0	0	1	NA	Inf	FALSE	Hispanic or Latino	QUIT	59	Female	FALSE	TRUE	FALSE	FALSE	FALSE	F	0.742	non-black
475	OUTPATIENT	High	Final result	1.2	4510-11-25	4510-11-25	Yes	CREATININE	1.2	0.79	4510-02-20	0	NA	NA	Inf	26	4510-02-20	24	1	1	0	0	FALSE	320	27	1.8	NA	0.86	0	0	0	0	0	1	NA	Inf	FALSE	Hispanic or Latino	QUIT	59	Female	FALSE	TRUE	FALSE	FALSE	FALSE	F	0.742	non-black
476	OUTPATIENT	High	Final result	1.13	4510-11-11	4510-11-11	Yes	CREATININE	1.13	0.79	4510-02-20	0	NA	NA	Inf	26	4510-02-20	24	1	1	0	0	FALSE	320	27	1.8	NA	0.86	0	0	0	0	0	1	NA	Inf	FALSE	Hispanic or Latino	QUIT	59	Female	FALSE	TRUE	FALSE	FALSE	FALSE	F	0.742	non-black
477	OUTPATIENT	High	Final result	1.19	4510-11-10	4510-11-10	Yes	CREATININE	1.19	0.79	4510-02-20	0	NA	NA	Inf	26	4510-02-20	24	1	1	0	0	FALSE	320	27	1.8	NA	0.86	0	0	0	0	0	1	NA	Inf	FALSE	Hispanic or Latino	QUIT	59	Female	FALSE	TRUE	FALSE	FALSE	FALSE	F	0.742	non-black
478	OUTPATIENT	High	Final result	1.11	4510-11-14	4510-11-15	Yes	CREATININE	1.11	0.79	4510-02-20	0	NA	NA	Inf	26	4510-02-20	24	1	1	0	0	FALSE	320	27	1.8	NA	0.86	0	0	0	0	0	1	NA	Inf	FALSE	Hispanic or Latino	QUIT	59	Female	FALSE	TRUE	FALSE	FALSE	FALSE	F	0.742	non-black
479	OUTPATIENT	High	Final result	1.11	4510-11-22	4510-11-22	Yes	CREATININE	1.11	0.79	4510-02-20	0	NA	NA	Inf	26	4510-02-20	24	1	1	0	0	FALSE	320	27	1.8	NA	0.86	0	0	0	0	0	1	NA	Inf	FALSE	Hispanic or Latino	QUIT	59	Female	FALSE	TRUE	FALSE	FALSE	FALSE	F	0.742	non-black
480	OUTPATIENT	*Unspecified	Final result	1.06	4510-11-13	4510-11-13	Yes	CREATININE	1.06	0.79	4510-02-20	0	NA	NA	Inf	26	4510-02-20	24	1	1	0	0	FALSE	320	27	1.8	NA	0.86	0	0	0	0	0	1	NA	Inf	FALSE	Hispanic or Latino	QUIT	59	Female	FALSE	TRUE	FALSE	FALSE	FALSE	F	0.742	non-black
481	OUTPATIENT	*Unspecified	Final result	0.98	4510-11-18	4510-11-18	Yes	CREATININE	0.98	0.79	4510-02-20	0	NA	NA	Inf	26	4510-02-20	24	1	1	0	0	FALSE	320	27	1.8	NA	0.86	0	0	0	0	0	1	NA	Inf	FALSE	Hispanic or Latino	QUIT	59	Female	FALSE	TRUE	FALSE	FALSE	FALSE	F	0.742	non-black
482	OUTPATIENT	*Unspecified	Final result	1.02	4510-11-19	4510-11-19	Yes	CREATININE	1.02	0.79	4510-02-20	0	NA	NA	Inf	26	4510-02-20	24	1	1	0	0	FALSE	320	27	1.8	NA	0.86	0	0	0	0	0	1	NA	Inf	FALSE	Hispanic or Latino	QUIT	59	Female	FALSE	TRUE	FALSE	FALSE	FALSE	F	0.742	non-black
483	OUTPATIENT	*Unspecified	Final result	0.99	4510-11-17	4510-11-17	Yes	CREATININE	0.99	0.79	4510-02-20	0	NA	NA	Inf	26	4510-02-20	24	1	1	0	0	FALSE	320	27	1.8	NA	0.86	0	0	0	0	0	1	NA	Inf	FALSE	Hispanic or Latino	QUIT	59	Female	FALSE	TRUE	FALSE	FALSE	FALSE	F	0.742	non-black
484	OUTPATIENT	*Unspecified	Final result	0.97	4510-11-16	4510-11-16	Yes	CREATININE	0.97	0.79	4510-02-20	0	NA	NA	Inf	26	4510-02-20	24	1	1	0	0	FALSE	320	27	1.8	NA	0.86	0	0	0	0	0	1	NA	Inf	FALSE	Hispanic or Latino	QUIT	59	Female	FALSE	TRUE	FALSE	FALSE	FALSE	F	0.742	non-black
485	OUTPATIENT	*Unspecified	Final result	1.04	4510-11-15	4510-11-15	Yes	CREATININE	1.04	0.79	4510-02-20	0	NA	NA	Inf	26	4510-02-20	24	1	1	0	0	FALSE	320	27	1.8	NA	0.86	0	0	0	0	0	1	NA	Inf	FALSE	Hispanic or Latino	QUIT	59	Female	FALSE	TRUE	FALSE	FALSE	FALSE	F	0.742	non-black
486	OUTPATIENT	*Unspecified	Final result	1.03	4510-11-12	4510-11-12	Yes	CREATININE	1.03	0.79	4510-02-20	0	NA	NA	Inf	26	4510-02-20	24	1	1	0	0	FALSE	320	27	1.8	NA	0.86	0	0	0	0	0	1	NA	Inf	FALSE	Hispanic or Latino	QUIT	59	Female	FALSE	TRUE	FALSE	FALSE	FALSE	F	0.742	non-black
487	OUTPATIENT	High	Final result	1.12	4510-11-09	4510-11-09	Yes	CREATININE	1.12	0.79	4510-02-20	0	NA	NA	Inf	26	4510-02-20	24	1	1	0	0	FALSE	320	27	1.8	NA	0.86	0	0	0	0	0	1	NA	Inf	FALSE	Hispanic or Latino	QUIT	59	Female	FALSE	TRUE	FALSE	FALSE	FALSE	F	0.742	non-black
488	OUTPATIENT	High	Final result	1.37	4510-11-09	4510-11-09	Yes	CREATININE	1.37	0.79	4510-02-20	0	NA	NA	Inf	26	4510-02-20	24	1	1	0	0	FALSE	320	27	1.8	NA	0.86	0	0	0	0	0	1	NA	Inf	FALSE	Hispanic or Latino	QUIT	59	Female	FALSE	TRUE	FALSE	FALSE	FALSE	F	0.742	non-black
489	OUTPATIENT	*Unspecified	Final result	1	4510-11-21	4510-11-21	Yes	CREATININE	1	0.79	4510-02-20	0	NA	NA	Inf	26	4510-02-20	24	1	1	0	0	FALSE	320	27	1.8	NA	0.86	0	0	0	0	0	1	NA	Inf	FALSE	Hispanic or Latino	QUIT	59	Female	FALSE	TRUE	FALSE	FALSE	FALSE	F	0.742	non-black
490	OUTPATIENT	High	Final result	1.13	4510-11-23	4510-11-23	Yes	CREATININE	1.13	0.79	4510-02-20	0	NA	NA	Inf	26	4510-02-20	24	1	1	0	0	FALSE	320	27	1.8	NA	0.86	0	0	0	0	0	1	NA	Inf	FALSE	Hispanic or Latino	QUIT	59	Female	FALSE	TRUE	FALSE	FALSE	FALSE	F	0.742	non-black
491	OUTPATIENT	*Unspecified	Final result	1.01	4511-01-10	4511-01-10	Yes	CREATININE	1.01	0.79	4510-02-20	0	NA	NA	Inf	26	4510-02-20	24	1	1	0	0	FALSE	320	27	1.8	NA	0.86	0	0	0	0	0	1	NA	Inf	FALSE	Hispanic or Latino	QUIT	59	Female	FALSE	TRUE	FALSE	FALSE	FALSE	F	0.742	non-black
492	OUTPATIENT	High	Final result	1.41	4511-01-07	4511-01-07	Yes	CREATININE	1.41	0.79	4510-02-20	0	NA	NA	Inf	26	4510-02-20	24	1	1	0	0	FALSE	320	27	1.8	NA	0.86	0	0	0	0	0	1	NA	Inf	FALSE	Hispanic or Latino	QUIT	59	Female	FALSE	TRUE	FALSE	FALSE	FALSE	F	0.742	non-black
493	OUTPATIENT	High	Final result	1.34	4511-01-07	4511-01-07	Yes	CREATININE	1.34	0.79	4510-02-20	0	NA	NA	Inf	26	4510-02-20	24	1	1	0	0	FALSE	320	27	1.8	NA	0.86	0	0	0	0	0	1	NA	Inf	FALSE	Hispanic or Latino	QUIT	59	Female	FALSE	TRUE	FALSE	FALSE	FALSE	F	0.742	non-black
494	OUTPATIENT	High	Final result	1.26	4511-01-08	4511-01-08	Yes	CREATININE	1.26	0.79	4510-02-20	0	NA	NA	Inf	26	4510-02-20	24	1	1	0	0	FALSE	320	27	1.8	NA	0.86	0	0	0	0	0	1	NA	Inf	FALSE	Hispanic or Latino	QUIT	59	Female	FALSE	TRUE	FALSE	FALSE	FALSE	F	0.742	non-black
495	OUTPATIENT	High	Final result	1.49	4510-07-19	4510-07-19	Yes	CREATININE	1.49	0.79	4510-02-20	0	NA	NA	Inf	26	4510-02-20	24	1	1	0	0	FALSE	320	27	1.8	NA	0.86	0	0	0	0	0	1	NA	Inf	FALSE	Hispanic or Latino	QUIT	59	Female	FALSE	TRUE	FALSE	FALSE	FALSE	F	0.742	non-black
496	OUTPATIENT	*Unspecified	Final result	0.53	4510-02-27	4510-02-27	Yes	CREATININE	0.53	0.813957	4510-01-28	0	NA	NA	Inf	8	4510-01-28	1	1	1	0	0	FALSE	431	7	1.4	NA	0.51	0	0	0	0	0	1	NA	Inf	FALSE	NOT Hispanic or Latino	NEVER	65	Female	FALSE	FALSE	FALSE	FALSE	FALSE	F	0.742	non-black
497	OUTPATIENT	*Unspecified	Final result	0.5	4510-02-02	4510-02-02	Yes	CREATININE	0.5	0.813957	4510-01-28	0	NA	NA	Inf	8	4510-01-28	1	1	1	0	0	FALSE	431	7	1.4	NA	0.51	0	0	0	0	0	1	NA	Inf	FALSE	NOT Hispanic or Latino	NEVER	65	Female	FALSE	FALSE	FALSE	FALSE	FALSE	F	0.742	non-black
498	OUTPATIENT	*Unspecified	Final result	0.56	4510-06-18	4510-06-18	Yes	CREATININE	0.56	0.813957	4510-01-28	0	NA	NA	Inf	8	4510-01-28	1	1	1	0	0	FALSE	431	7	1.4	NA	0.51	0	0	0	0	0	1	NA	Inf	FALSE	NOT Hispanic or Latino	NEVER	65	Female	FALSE	FALSE	FALSE	FALSE	FALSE	F	0.742	non-black
499	OUTPATIENT	*Unspecified	Final result	0.62	4510-09-10	4510-09-10	Yes	CREATININE	0.62	0.813957	4510-01-28	0	NA	NA	Inf	8	4510-01-28	1	1	1	0	0	FALSE	431	7	1.4	NA	0.51	0	0	0	0	0	1	NA	Inf	FALSE	NOT Hispanic or Latino	NEVER	65	Female	FALSE	FALSE	FALSE	FALSE	FALSE	F	0.742	non-black
500	OUTPATIENT	*Unspecified	Final result	0.51	4510-01-28	4510-01-28	Yes	CREATININE	0.51	0.813957	4510-01-28	0	NA	NA	Inf	8	4510-01-28	1	1	1	0	0	FALSE	431	7	1.4	NA	0.51	0	0	0	0	0	1	NA	Inf	FALSE	NOT Hispanic or Latino	NEVER	65	Female	FALSE	FALSE	FALSE	FALSE	FALSE	F	0.742	non-black
501	OUTPATIENT	*Unspecified	Final result	0.52	4510-02-01	4510-02-01	Yes	CREATININE	0.52	0.813957	4510-01-28	0	NA	NA	Inf	8	4510-01-28	1	1	1	0	0	FALSE	431	7	1.4	NA	0.51	0	0	0	0	0	1	NA	Inf	FALSE	NOT Hispanic or Latino	NEVER	65	Female	FALSE	FALSE	FALSE	FALSE	FALSE	F	0.742	non-black
502	OUTPATIENT	Low	Final result	0.47	4510-01-29	4510-01-29	Yes	CREATININE	0.47	0.813957	4510-01-28	0	NA	NA	Inf	8	4510-01-28	1	1	1	0	0	FALSE	431	7	1.4	NA	0.51	0	0	0	0	0	1	NA	Inf	FALSE	NOT Hispanic or Latino	NEVER	65	Female	FALSE	FALSE	FALSE	FALSE	FALSE	F	0.742	non-black
503	OUTPATIENT	*Unspecified	Final result	0.52	4510-01-31	4510-01-31	Yes	CREATININE	0.52	0.813957	4510-01-28	0	NA	NA	Inf	8	4510-01-28	1	1	1	0	0	FALSE	431	7	1.4	NA	0.51	0	0	0	0	0	1	NA	Inf	FALSE	NOT Hispanic or Latino	NEVER	65	Female	FALSE	FALSE	FALSE	FALSE	FALSE	F	0.742	non-black
504	OUTPATIENT	Low	Final result	0.49	4510-01-30	4510-01-30	Yes	CREATININE	0.49	0.813957	4510-01-28	0	NA	NA	Inf	8	4510-01-28	1	1	1	0	0	FALSE	431	7	1.4	NA	0.51	0	0	0	0	0	1	NA	Inf	FALSE	NOT Hispanic or Latino	NEVER	65	Female	FALSE	FALSE	FALSE	FALSE	FALSE	F	0.742	non-black
505	OUTPATIENT	*Unspecified	Final result	0.54	4510-12-03	4510-12-03	Yes	CREATININE	0.54	0.813957	4510-01-28	0	NA	NA	Inf	8	4510-01-28	1	1	1	0	0	FALSE	431	7	1.4	NA	0.51	0	0	0	0	0	1	NA	Inf	FALSE	NOT Hispanic or Latino	NEVER	65	Female	FALSE	FALSE	FALSE	FALSE	FALSE	F	0.742	non-black
506	OUTPATIENT	*Unspecified	Final result	0.61	4511-04-15	4511-04-15	Yes	CREATININE	0.61	0.813957	4510-01-28	0	NA	NA	Inf	8	4510-01-28	1	1	1	0	0	FALSE	431	7	1.4	NA	0.51	0	0	0	0	0	1	NA	Inf	FALSE	NOT Hispanic or Latino	NEVER	65	Female	FALSE	FALSE	FALSE	FALSE	FALSE	F	0.742	non-black
507	OUTPATIENT	*Unspecified	Final result	0.83	4510-02-01	4510-02-01	Yes	CREATININE	0.83	0.83	4510-02-01	0	NA	NA	Inf	5	4510-02-01	4	1	1	1	1	FALSE	NA	9	NA	NA	0.83	0	0	0	0	0	1	NA	Inf	FALSE	Hispanic or Latino	NEVER	36	Male	FALSE	FALSE	FALSE	FALSE	FALSE	M	1	non-black
508	OUTPATIENT	*Unspecified	Final result	0.8	4510-08-31	4510-08-31	Yes	CREATININE	0.8	0.46	4510-01-24	0	NA	NA	Inf	16	4510-01-24	14	1	1	1	1	FALSE	529	12	1.5	0.9	0.52	0	0	0	0	0	1	NA	Inf	FALSE	Hispanic or Latino	NEVER	73	Female	FALSE	TRUE	FALSE	FALSE	FALSE	F	0.742	non-black
509	OUTPATIENT	*Unspecified	Final result	0.52	4510-01-24	4510-01-24	Yes	CREATININE	0.52	0.46	4510-01-24	0	NA	NA	Inf	16	4510-01-24	14	1	1	1	1	FALSE	529	12	1.5	0.9	0.52	0	0	0	0	0	1	NA	Inf	FALSE	Hispanic or Latino	NEVER	73	Female	FALSE	TRUE	FALSE	FALSE	FALSE	F	0.742	non-black
510	OUTPATIENT	*Unspecified	Final result	0.7	4510-02-25	4510-02-25	Yes	CREATININE	0.7	0.46	4510-01-24	0	NA	NA	Inf	16	4510-01-24	14	1	1	1	1	FALSE	529	12	1.5	0.9	0.52	0	0	0	0	0	1	NA	Inf	FALSE	Hispanic or Latino	NEVER	73	Female	FALSE	TRUE	FALSE	FALSE	FALSE	F	0.742	non-black
511	OUTPATIENT	*Unspecified	Final result	0.57	4510-08-31	4510-08-31	Yes	CREATININE	0.57	0.46	4510-01-24	0	NA	NA	Inf	16	4510-01-24	14	1	1	1	1	FALSE	529	12	1.5	0.9	0.52	0	0	0	0	0	1	NA	Inf	FALSE	Hispanic or Latino	NEVER	73	Female	FALSE	TRUE	FALSE	FALSE	FALSE	F	0.742	non-black
512	OUTPATIENT	*Unspecified	Preliminary result	0.82	4510-09-02	4510-09-02	No	CREATININE	0.82	0.46	4510-01-24	0	NA	NA	Inf	16	4510-01-24	14	1	1	1	1	FALSE	529	12	1.5	0.9	0.52	0	0	0	0	0	1	NA	Inf	FALSE	Hispanic or Latino	NEVER	73	Female	FALSE	TRUE	FALSE	FALSE	FALSE	F	0.742	non-black
513	OUTPATIENT	*Unspecified	Final result	0.6	4510-09-05	4510-09-05	Yes	CREATININE	0.6	0.46	4510-01-24	0	NA	NA	Inf	16	4510-01-24	14	1	1	1	1	FALSE	529	12	1.5	0.9	0.52	0	0	0	0	0	1	NA	Inf	FALSE	Hispanic or Latino	NEVER	73	Female	FALSE	TRUE	FALSE	FALSE	FALSE	F	0.742	non-black
514	OUTPATIENT	*Unspecified	Final result	0.66	4510-09-07	4510-09-07	Yes	CREATININE	0.66	0.46	4510-01-24	0	NA	NA	Inf	16	4510-01-24	14	1	1	1	1	FALSE	529	12	1.5	0.9	0.52	0	0	0	0	0	1	NA	Inf	FALSE	Hispanic or Latino	NEVER	73	Female	FALSE	TRUE	FALSE	FALSE	FALSE	F	0.742	non-black
515	OUTPATIENT	*Unspecified	Final result	0.64	4510-09-08	4510-09-08	Yes	CREATININE	0.64	0.46	4510-01-24	0	NA	NA	Inf	16	4510-01-24	14	1	1	1	1	FALSE	529	12	1.5	0.9	0.52	0	0	0	0	0	1	NA	Inf	FALSE	Hispanic or Latino	NEVER	73	Female	FALSE	TRUE	FALSE	FALSE	FALSE	F	0.742	non-black
516	OUTPATIENT	*Unspecified	Final result	0.6	4510-09-03	4510-09-03	Yes	CREATININE	0.6	0.46	4510-01-24	0	NA	NA	Inf	16	4510-01-24	14	1	1	1	1	FALSE	529	12	1.5	0.9	0.52	0	0	0	0	0	1	NA	Inf	FALSE	Hispanic or Latino	NEVER	73	Female	FALSE	TRUE	FALSE	FALSE	FALSE	F	0.742	non-black
517	OUTPATIENT	*Unspecified	Final result	0.62	4510-09-06	4510-09-06	Yes	CREATININE	0.62	0.46	4510-01-24	0	NA	NA	Inf	16	4510-01-24	14	1	1	1	1	FALSE	529	12	1.5	0.9	0.52	0	0	0	0	0	1	NA	Inf	FALSE	Hispanic or Latino	NEVER	73	Female	FALSE	TRUE	FALSE	FALSE	FALSE	F	0.742	non-black
518	OUTPATIENT	*Unspecified	Final result	0.55	4510-09-04	4510-09-04	Yes	CREATININE	0.55	0.46	4510-01-24	0	NA	NA	Inf	16	4510-01-24	14	1	1	1	1	FALSE	529	12	1.5	0.9	0.52	0	0	0	0	0	1	NA	Inf	FALSE	Hispanic or Latino	NEVER	73	Female	FALSE	TRUE	FALSE	FALSE	FALSE	F	0.742	non-black
519	OUTPATIENT	*Unspecified	Final result	0.61	4510-09-01	4510-09-01	Yes	CREATININE	0.61	0.46	4510-01-24	0	NA	NA	Inf	16	4510-01-24	14	1	1	1	1	FALSE	529	12	1.5	0.9	0.52	0	0	0	0	0	1	NA	Inf	FALSE	Hispanic or Latino	NEVER	73	Female	FALSE	TRUE	FALSE	FALSE	FALSE	F	0.742	non-black
520	OUTPATIENT	*Unspecified	Final result	0.68	4510-01-29	4510-01-29	Yes	CREATININE	0.68	0.771715	4510-01-28	0	NA	NA	Inf	3	4510-01-28	1	1	0	0	0	FALSE	238	NA	1.9	NA	NA	0	0	0	0	886998	5.94793	4510-01-27	Inf	FALSE	NOT Hispanic or Latino	NEVER	88	Female	TRUE	TRUE	FALSE	FALSE	FALSE	F	0.742	non-black
521	OUTPATIENT	*Unspecified	Final result	0.63	4510-02-15	4510-02-15	Yes	CREATININE	0.63	0.771715	4510-01-28	0	NA	NA	Inf	3	4510-01-28	1	1	0	0	0	FALSE	238	NA	1.9	NA	NA	0	0	0	0	886998	5.94793	4510-01-27	Inf	FALSE	NOT Hispanic or Latino	NEVER	88	Female	TRUE	TRUE	FALSE	FALSE	FALSE	F	0.742	non-black
522	OUTPATIENT	*Unspecified	Final result	0.71	4510-09-13	4510-09-13	Yes	CREATININE	0.71	0.771715	4510-01-28	0	NA	NA	Inf	3	4510-01-28	1	1	0	0	0	FALSE	238	NA	1.9	NA	NA	0	0	0	0	886998	5.94793	4510-01-27	Inf	FALSE	NOT Hispanic or Latino	NEVER	88	Female	TRUE	TRUE	FALSE	FALSE	FALSE	F	0.742	non-black
523	OUTPATIENT	*Unspecified	Final result	0.75	4510-05-31	4510-05-31	Yes	CREATININE	0.75	0.771715	4510-01-28	0	NA	NA	Inf	3	4510-01-28	1	1	0	0	0	FALSE	238	NA	1.9	NA	NA	0	0	0	0	886998	5.94793	4510-01-27	Inf	FALSE	NOT Hispanic or Latino	NEVER	88	Female	TRUE	TRUE	FALSE	FALSE	FALSE	F	0.742	non-black
524	OUTPATIENT	*Unspecified	Final result	0.8	4511-03-12	4511-03-12	Yes	CREATININE	0.8	0.771715	4510-01-28	0	NA	NA	Inf	3	4510-01-28	1	1	0	0	0	FALSE	238	NA	1.9	NA	NA	0	0	0	0	886998	5.94793	4510-01-27	Inf	FALSE	NOT Hispanic or Latino	NEVER	88	Female	TRUE	TRUE	FALSE	FALSE	FALSE	F	0.742	non-black
525	OUTPATIENT	High	Final result	6.68	4510-01-28	4510-01-28	Yes	CREATININE	6.68	1.01412	4510-01-28	3	4510-01-25	4510-01-30	0	6	4510-01-28	3	1	0	5	1	FALSE	255	78	1.6	NA	6.68	1	0	0	1	0	1	NA	-3	FALSE	Hispanic or Latino	NEVER	81	Male	FALSE	FALSE	FALSE	FALSE	FALSE	M	1	non-black
526	OUTPATIENT	High	Final result	5.96	4510-01-30	4510-01-30	Yes	CREATININE	5.96	1.01412	4510-01-28	3	4510-01-25	4510-01-30	0	6	4510-01-28	3	1	0	5	1	FALSE	255	78	1.6	NA	6.68	1	0	0	1	0	1	NA	-3	FALSE	Hispanic or Latino	NEVER	81	Male	FALSE	FALSE	FALSE	FALSE	FALSE	M	1	non-black
527	OUTPATIENT	High	Final result	6.26	4510-01-29	4510-01-29	Yes	CREATININE	6.26	1.01412	4510-01-28	3	4510-01-25	4510-01-30	0	6	4510-01-28	3	1	0	5	1	FALSE	255	78	1.6	NA	6.68	1	0	0	1	0	1	NA	-3	FALSE	Hispanic or Latino	NEVER	81	Male	FALSE	FALSE	FALSE	FALSE	FALSE	M	1	non-black
528	OUTPATIENT	High	Final result	6.52	4510-01-28	4510-01-28	Yes	CREATININE	6.52	1.01412	4510-01-28	3	4510-01-25	4510-01-30	0	6	4510-01-28	3	1	0	5	1	FALSE	255	78	1.6	NA	6.68	1	0	0	1	0	1	NA	-3	FALSE	Hispanic or Latino	NEVER	81	Male	FALSE	FALSE	FALSE	FALSE	FALSE	M	1	non-black
529	OUTPATIENT	*Unspecified	Final result	0.91	4510-01-30	4510-01-30	Yes	CREATININE	0.91	0.81618	4510-01-29	0	NA	NA	Inf	3	4510-01-29	1	1	0	1	1	FALSE	293	28	1.8	NA	1.02	0	0	0	0	0	1	NA	Inf	FALSE	Hispanic or Latino	QUIT	64	Female	TRUE	FALSE	FALSE	FALSE	FALSE	F	0.742	non-black
530	OUTPATIENT	*Unspecified	Final result	0.67	4511-06-26	4511-06-26	Yes	CREATININE	0.67	0.81618	4510-01-29	0	NA	NA	Inf	3	4510-01-29	1	1	0	1	1	FALSE	293	28	1.8	NA	1.02	0	0	0	0	0	1	NA	Inf	FALSE	Hispanic or Latino	QUIT	64	Female	TRUE	FALSE	FALSE	FALSE	FALSE	F	0.742	non-black
531	OUTPATIENT	*Unspecified	Final result	1.02	4510-01-29	4510-01-29	Yes	CREATININE	1.02	0.81618	4510-01-29	0	NA	NA	Inf	3	4510-01-29	1	1	0	1	1	FALSE	293	28	1.8	NA	1.02	0	0	0	0	0	1	NA	Inf	FALSE	Hispanic or Latino	QUIT	64	Female	TRUE	FALSE	FALSE	FALSE	FALSE	F	0.742	non-black
532	OUTPATIENT	*Unspecified	Final result	0.89	4510-01-29	4510-01-30	Yes	CREATININE	0.89	0.81618	4510-01-29	0	NA	NA	Inf	3	4510-01-29	1	1	0	1	1	FALSE	293	28	1.8	NA	1.02	0	0	0	0	0	1	NA	Inf	FALSE	Hispanic or Latino	QUIT	64	Female	TRUE	FALSE	FALSE	FALSE	FALSE	F	0.742	non-black
533	OUTPATIENT	*Unspecified	Final result	0.88	4510-01-29	4510-01-29	Yes	CREATININE	0.88	0.81618	4510-01-29	0	NA	NA	Inf	3	4510-01-29	1	1	0	1	1	FALSE	293	28	1.8	NA	1.02	0	0	0	0	0	1	NA	Inf	FALSE	Hispanic or Latino	QUIT	64	Female	TRUE	FALSE	FALSE	FALSE	FALSE	F	0.742	non-black
534	OUTPATIENT	*Unspecified	Final result	0.59	4511-06-10	4511-06-11	Yes	CREATININE	0.59	0.81618	4510-01-29	0	NA	NA	Inf	3	4510-01-29	1	1	0	1	1	FALSE	293	28	1.8	NA	1.02	0	0	0	0	0	1	NA	Inf	FALSE	Hispanic or Latino	QUIT	64	Female	TRUE	FALSE	FALSE	FALSE	FALSE	F	0.742	non-black
535	OUTPATIENT	*Unspecified	Final result	0.81	4511-05-08	4511-05-08	Yes	CREATININE	0.81	0.81618	4510-01-29	0	NA	NA	Inf	3	4510-01-29	1	1	0	1	1	FALSE	293	28	1.8	NA	1.02	0	0	0	0	0	1	NA	Inf	FALSE	Hispanic or Latino	QUIT	64	Female	TRUE	FALSE	FALSE	FALSE	FALSE	F	0.742	non-black
536	OUTPATIENT	*Unspecified	Final result	0.61	4511-06-10	4511-06-10	Yes	CREATININE	0.61	0.81618	4510-01-29	0	NA	NA	Inf	3	4510-01-29	1	1	0	1	1	FALSE	293	28	1.8	NA	1.02	0	0	0	0	0	1	NA	Inf	FALSE	Hispanic or Latino	QUIT	64	Female	TRUE	FALSE	FALSE	FALSE	FALSE	F	0.742	non-black
537	OUTPATIENT	*Unspecified	Final result	0.68	4511-01-06	4511-01-06	Yes	CREATININE	0.68	0.81618	4510-01-29	0	NA	NA	Inf	3	4510-01-29	1	1	0	1	1	FALSE	293	28	1.8	NA	1.02	0	0	0	0	0	1	NA	Inf	FALSE	Hispanic or Latino	QUIT	64	Female	TRUE	FALSE	FALSE	FALSE	FALSE	F	0.742	non-black
538	OUTPATIENT	*Unspecified	Final result	0.67	4511-02-03	4511-02-03	Yes	CREATININE	0.67	0.81618	4510-01-29	0	NA	NA	Inf	3	4510-01-29	1	1	0	1	1	FALSE	293	28	1.8	NA	1.02	0	0	0	0	0	1	NA	Inf	FALSE	Hispanic or Latino	QUIT	64	Female	TRUE	FALSE	FALSE	FALSE	FALSE	F	0.742	non-black
539	OUTPATIENT	*Unspecified	Final result	0.72	4511-02-28	4511-02-28	Yes	CREATININE	0.72	0.81618	4510-01-29	0	NA	NA	Inf	3	4510-01-29	1	1	0	1	1	FALSE	293	28	1.8	NA	1.02	0	0	0	0	0	1	NA	Inf	FALSE	Hispanic or Latino	QUIT	64	Female	TRUE	FALSE	FALSE	FALSE	FALSE	F	0.742	non-black
540	OUTPATIENT	*Unspecified	Final result	0.78	4511-03-25	4511-03-25	Yes	CREATININE	0.78	0.81618	4510-01-29	0	NA	NA	Inf	3	4510-01-29	1	1	0	1	1	FALSE	293	28	1.8	NA	1.02	0	0	0	0	0	1	NA	Inf	FALSE	Hispanic or Latino	QUIT	64	Female	TRUE	FALSE	FALSE	FALSE	FALSE	F	0.742	non-black
541	OUTPATIENT	*Unspecified	Final result	0.63	4510-10-14	4510-10-14	Yes	CREATININE	0.63	0.81618	4510-01-29	0	NA	NA	Inf	3	4510-01-29	1	1	0	1	1	FALSE	293	28	1.8	NA	1.02	0	0	0	0	0	1	NA	Inf	FALSE	Hispanic or Latino	QUIT	64	Female	TRUE	FALSE	FALSE	FALSE	FALSE	F	0.742	non-black
542	OUTPATIENT	*Unspecified	Final result	0.71	4510-10-09	4510-10-09	Yes	CREATININE	0.71	0.81618	4510-01-29	0	NA	NA	Inf	3	4510-01-29	1	1	0	1	1	FALSE	293	28	1.8	NA	1.02	0	0	0	0	0	1	NA	Inf	FALSE	Hispanic or Latino	QUIT	64	Female	TRUE	FALSE	FALSE	FALSE	FALSE	F	0.742	non-black
543	OUTPATIENT	*Unspecified	Final result	0.55	4510-10-12	4510-10-12	Yes	CREATININE	0.55	0.81618	4510-01-29	0	NA	NA	Inf	3	4510-01-29	1	1	0	1	1	FALSE	293	28	1.8	NA	1.02	0	0	0	0	0	1	NA	Inf	FALSE	Hispanic or Latino	QUIT	64	Female	TRUE	FALSE	FALSE	FALSE	FALSE	F	0.742	non-black
544	OUTPATIENT	*Unspecified	Final result	0.59	4510-10-09	4510-10-09	Yes	CREATININE	0.59	0.81618	4510-01-29	0	NA	NA	Inf	3	4510-01-29	1	1	0	1	1	FALSE	293	28	1.8	NA	1.02	0	0	0	0	0	1	NA	Inf	FALSE	Hispanic or Latino	QUIT	64	Female	TRUE	FALSE	FALSE	FALSE	FALSE	F	0.742	non-black
545	OUTPATIENT	*Unspecified	Final result	0.58	4510-10-13	4510-10-13	Yes	CREATININE	0.58	0.81618	4510-01-29	0	NA	NA	Inf	3	4510-01-29	1	1	0	1	1	FALSE	293	28	1.8	NA	1.02	0	0	0	0	0	1	NA	Inf	FALSE	Hispanic or Latino	QUIT	64	Female	TRUE	FALSE	FALSE	FALSE	FALSE	F	0.742	non-black
546	OUTPATIENT	*Unspecified	Final result	0.6	4510-10-10	4510-10-10	Yes	CREATININE	0.6	0.81618	4510-01-29	0	NA	NA	Inf	3	4510-01-29	1	1	0	1	1	FALSE	293	28	1.8	NA	1.02	0	0	0	0	0	1	NA	Inf	FALSE	Hispanic or Latino	QUIT	64	Female	TRUE	FALSE	FALSE	FALSE	FALSE	F	0.742	non-black
547	OUTPATIENT	*Unspecified	Final result	0.63	4510-10-11	4510-10-11	Yes	CREATININE	0.63	0.81618	4510-01-29	0	NA	NA	Inf	3	4510-01-29	1	1	0	1	1	FALSE	293	28	1.8	NA	1.02	0	0	0	0	0	1	NA	Inf	FALSE	Hispanic or Latino	QUIT	64	Female	TRUE	FALSE	FALSE	FALSE	FALSE	F	0.742	non-black
548	OUTPATIENT	*Unspecified	Final result	0.85	4511-03-02	4511-03-02	Yes	CREATININE	0.85	0.81618	4510-01-29	0	NA	NA	Inf	3	4510-01-29	1	1	0	1	1	FALSE	293	28	1.8	NA	1.02	0	0	0	0	0	1	NA	Inf	FALSE	Hispanic or Latino	QUIT	64	Female	TRUE	FALSE	FALSE	FALSE	FALSE	F	0.742	non-black
549	OUTPATIENT	*Unspecified	Final result	0.8	4511-03-01	4511-03-01	Yes	CREATININE	0.8	0.81618	4510-01-29	0	NA	NA	Inf	3	4510-01-29	1	1	0	1	1	FALSE	293	28	1.8	NA	1.02	0	0	0	0	0	1	NA	Inf	FALSE	Hispanic or Latino	QUIT	64	Female	TRUE	FALSE	FALSE	FALSE	FALSE	F	0.742	non-black
550	OUTPATIENT	*Unspecified	Final result	0.77	4511-03-13	4511-03-13	Yes	CREATININE	0.77	0.81618	4510-01-29	0	NA	NA	Inf	3	4510-01-29	1	1	0	1	1	FALSE	293	28	1.8	NA	1.02	0	0	0	0	0	1	NA	Inf	FALSE	Hispanic or Latino	QUIT	64	Female	TRUE	FALSE	FALSE	FALSE	FALSE	F	0.742	non-black
551	OUTPATIENT	*Unspecified	Final result	0.8	4511-03-12	4511-03-12	Yes	CREATININE	0.8	0.81618	4510-01-29	0	NA	NA	Inf	3	4510-01-29	1	1	0	1	1	FALSE	293	28	1.8	NA	1.02	0	0	0	0	0	1	NA	Inf	FALSE	Hispanic or Latino	QUIT	64	Female	TRUE	FALSE	FALSE	FALSE	FALSE	F	0.742	non-black
552	OUTPATIENT	*Unspecified	Final result	0.9	4511-03-13	4511-03-13	Yes	CREATININE	0.9	0.81618	4510-01-29	0	NA	NA	Inf	3	4510-01-29	1	1	0	1	1	FALSE	293	28	1.8	NA	1.02	0	0	0	0	0	1	NA	Inf	FALSE	Hispanic or Latino	QUIT	64	Female	TRUE	FALSE	FALSE	FALSE	FALSE	F	0.742	non-black
553	OUTPATIENT	*Unspecified	Final result	0.7	4511-02-27	4511-02-27	Yes	CREATININE	0.7	0.81618	4510-01-29	0	NA	NA	Inf	3	4510-01-29	1	1	0	1	1	FALSE	293	28	1.8	NA	1.02	0	0	0	0	0	1	NA	Inf	FALSE	Hispanic or Latino	QUIT	64	Female	TRUE	FALSE	FALSE	FALSE	FALSE	F	0.742	non-black
554	OUTPATIENT	*Unspecified	Final result	0.72	4511-02-27	4511-02-27	Yes	CREATININE	0.72	0.81618	4510-01-29	0	NA	NA	Inf	3	4510-01-29	1	1	0	1	1	FALSE	293	28	1.8	NA	1.02	0	0	0	0	0	1	NA	Inf	FALSE	Hispanic or Latino	QUIT	64	Female	TRUE	FALSE	FALSE	FALSE	FALSE	F	0.742	non-black
555	OUTPATIENT	*Unspecified	Final result	0.75	4511-03-05	4511-03-05	Yes	CREATININE	0.75	0.81618	4510-01-29	0	NA	NA	Inf	3	4510-01-29	1	1	0	1	1	FALSE	293	28	1.8	NA	1.02	0	0	0	0	0	1	NA	Inf	FALSE	Hispanic or Latino	QUIT	64	Female	TRUE	FALSE	FALSE	FALSE	FALSE	F	0.742	non-black
556	OUTPATIENT	*Unspecified	Final result	0.69	4511-03-06	4511-03-06	Yes	CREATININE	0.69	0.81618	4510-01-29	0	NA	NA	Inf	3	4510-01-29	1	1	0	1	1	FALSE	293	28	1.8	NA	1.02	0	0	0	0	0	1	NA	Inf	FALSE	Hispanic or Latino	QUIT	64	Female	TRUE	FALSE	FALSE	FALSE	FALSE	F	0.742	non-black
557	OUTPATIENT	*Unspecified	Final result	0.68	4511-03-07	4511-03-07	Yes	CREATININE	0.68	0.81618	4510-01-29	0	NA	NA	Inf	3	4510-01-29	1	1	0	1	1	FALSE	293	28	1.8	NA	1.02	0	0	0	0	0	1	NA	Inf	FALSE	Hispanic or Latino	QUIT	64	Female	TRUE	FALSE	FALSE	FALSE	FALSE	F	0.742	non-black
558	OUTPATIENT	*Unspecified	Final result	0.92	4511-03-08	4511-03-08	Yes	CREATININE	0.92	0.81618	4510-01-29	0	NA	NA	Inf	3	4510-01-29	1	1	0	1	1	FALSE	293	28	1.8	NA	1.02	0	0	0	0	0	1	NA	Inf	FALSE	Hispanic or Latino	QUIT	64	Female	TRUE	FALSE	FALSE	FALSE	FALSE	F	0.742	non-black
559	OUTPATIENT	*Unspecified	Final result	0.79	4511-03-10	4511-03-10	Yes	CREATININE	0.79	0.81618	4510-01-29	0	NA	NA	Inf	3	4510-01-29	1	1	0	1	1	FALSE	293	28	1.8	NA	1.02	0	0	0	0	0	1	NA	Inf	FALSE	Hispanic or Latino	QUIT	64	Female	TRUE	FALSE	FALSE	FALSE	FALSE	F	0.742	non-black
560	OUTPATIENT	*Unspecified	Final result	0.75	4511-03-09	4511-03-09	Yes	CREATININE	0.75	0.81618	4510-01-29	0	NA	NA	Inf	3	4510-01-29	1	1	0	1	1	FALSE	293	28	1.8	NA	1.02	0	0	0	0	0	1	NA	Inf	FALSE	Hispanic or Latino	QUIT	64	Female	TRUE	FALSE	FALSE	FALSE	FALSE	F	0.742	non-black
561	OUTPATIENT	*Unspecified	Final result	0.78	4511-03-11	4511-03-11	Yes	CREATININE	0.78	0.81618	4510-01-29	0	NA	NA	Inf	3	4510-01-29	1	1	0	1	1	FALSE	293	28	1.8	NA	1.02	0	0	0	0	0	1	NA	Inf	FALSE	Hispanic or Latino	QUIT	64	Female	TRUE	FALSE	FALSE	FALSE	FALSE	F	0.742	non-black
562	OUTPATIENT	*Unspecified	Final result	0.84	4511-03-14	4511-03-14	Yes	CREATININE	0.84	0.81618	4510-01-29	0	NA	NA	Inf	3	4510-01-29	1	1	0	1	1	FALSE	293	28	1.8	NA	1.02	0	0	0	0	0	1	NA	Inf	FALSE	Hispanic or Latino	QUIT	64	Female	TRUE	FALSE	FALSE	FALSE	FALSE	F	0.742	non-black
563	OUTPATIENT	*Unspecified	Final result	0.82	4511-03-03	4511-03-03	Yes	CREATININE	0.82	0.81618	4510-01-29	0	NA	NA	Inf	3	4510-01-29	1	1	0	1	1	FALSE	293	28	1.8	NA	1.02	0	0	0	0	0	1	NA	Inf	FALSE	Hispanic or Latino	QUIT	64	Female	TRUE	FALSE	FALSE	FALSE	FALSE	F	0.742	non-black
564	OUTPATIENT	*Unspecified	Final result	0.85	4511-03-04	4511-03-04	Yes	CREATININE	0.85	0.81618	4510-01-29	0	NA	NA	Inf	3	4510-01-29	1	1	0	1	1	FALSE	293	28	1.8	NA	1.02	0	0	0	0	0	1	NA	Inf	FALSE	Hispanic or Latino	QUIT	64	Female	TRUE	FALSE	FALSE	FALSE	FALSE	F	0.742	non-black
565	OUTPATIENT	*Unspecified	Final result	0.64	4511-01-07	4511-01-07	Yes	CREATININE	0.64	0.81618	4510-01-29	0	NA	NA	Inf	3	4510-01-29	1	1	0	1	1	FALSE	293	28	1.8	NA	1.02	0	0	0	0	0	1	NA	Inf	FALSE	Hispanic or Latino	QUIT	64	Female	TRUE	FALSE	FALSE	FALSE	FALSE	F	0.742	non-black
566	OUTPATIENT	*Unspecified	Final result	0.6	4511-01-08	4511-01-08	Yes	CREATININE	0.6	0.81618	4510-01-29	0	NA	NA	Inf	3	4510-01-29	1	1	0	1	1	FALSE	293	28	1.8	NA	1.02	0	0	0	0	0	1	NA	Inf	FALSE	Hispanic or Latino	QUIT	64	Female	TRUE	FALSE	FALSE	FALSE	FALSE	F	0.742	non-black
567	OUTPATIENT	*Unspecified	Final result	0.61	4511-01-09	4511-01-09	Yes	CREATININE	0.61	0.81618	4510-01-29	0	NA	NA	Inf	3	4510-01-29	1	1	0	1	1	FALSE	293	28	1.8	NA	1.02	0	0	0	0	0	1	NA	Inf	FALSE	Hispanic or Latino	QUIT	64	Female	TRUE	FALSE	FALSE	FALSE	FALSE	F	0.742	non-black
568	OUTPATIENT	*Unspecified	Final result	0.83	4511-02-04	4511-02-04	Yes	CREATININE	0.83	0.81618	4510-01-29	0	NA	NA	Inf	3	4510-01-29	1	1	0	1	1	FALSE	293	28	1.8	NA	1.02	0	0	0	0	0	1	NA	Inf	FALSE	Hispanic or Latino	QUIT	64	Female	TRUE	FALSE	FALSE	FALSE	FALSE	F	0.742	non-black
569	OUTPATIENT	*Unspecified	Final result	0.71	4511-02-02	4511-02-02	Yes	CREATININE	0.71	0.81618	4510-01-29	0	NA	NA	Inf	3	4510-01-29	1	1	0	1	1	FALSE	293	28	1.8	NA	1.02	0	0	0	0	0	1	NA	Inf	FALSE	Hispanic or Latino	QUIT	64	Female	TRUE	FALSE	FALSE	FALSE	FALSE	F	0.742	non-black
570	OUTPATIENT	*Unspecified	Final result	0.85	4511-06-29	4511-06-29	Yes	CREATININE	0.85	0.81618	4510-01-29	0	NA	NA	Inf	3	4510-01-29	1	1	0	1	1	FALSE	293	28	1.8	NA	1.02	0	0	0	0	0	1	NA	Inf	FALSE	Hispanic or Latino	QUIT	64	Female	TRUE	FALSE	FALSE	FALSE	FALSE	F	0.742	non-black
571	OUTPATIENT	*Unspecified	Final result	0.66	4511-06-24	4511-06-24	Yes	CREATININE	0.66	0.81618	4510-01-29	0	NA	NA	Inf	3	4510-01-29	1	1	0	1	1	FALSE	293	28	1.8	NA	1.02	0	0	0	0	0	1	NA	Inf	FALSE	Hispanic or Latino	QUIT	64	Female	TRUE	FALSE	FALSE	FALSE	FALSE	F	0.742	non-black
572	OUTPATIENT	*Unspecified	Final result	0.66	4511-06-23	4511-06-23	Yes	CREATININE	0.66	0.81618	4510-01-29	0	NA	NA	Inf	3	4510-01-29	1	1	0	1	1	FALSE	293	28	1.8	NA	1.02	0	0	0	0	0	1	NA	Inf	FALSE	Hispanic or Latino	QUIT	64	Female	TRUE	FALSE	FALSE	FALSE	FALSE	F	0.742	non-black
573	OUTPATIENT	*Unspecified	Final result	0.63	4511-06-25	4511-06-25	Yes	CREATININE	0.63	0.81618	4510-01-29	0	NA	NA	Inf	3	4510-01-29	1	1	0	1	1	FALSE	293	28	1.8	NA	1.02	0	0	0	0	0	1	NA	Inf	FALSE	Hispanic or Latino	QUIT	64	Female	TRUE	FALSE	FALSE	FALSE	FALSE	F	0.742	non-black
574	OUTPATIENT	*Unspecified	Final result	0.63	4511-06-22	4511-06-22	Yes	CREATININE	0.63	0.81618	4510-01-29	0	NA	NA	Inf	3	4510-01-29	1	1	0	1	1	FALSE	293	28	1.8	NA	1.02	0	0	0	0	0	1	NA	Inf	FALSE	Hispanic or Latino	QUIT	64	Female	TRUE	FALSE	FALSE	FALSE	FALSE	F	0.742	non-black
575	OUTPATIENT	*Unspecified	Final result	0.65	4511-06-20	4511-06-20	Yes	CREATININE	0.65	0.81618	4510-01-29	0	NA	NA	Inf	3	4510-01-29	1	1	0	1	1	FALSE	293	28	1.8	NA	1.02	0	0	0	0	0	1	NA	Inf	FALSE	Hispanic or Latino	QUIT	64	Female	TRUE	FALSE	FALSE	FALSE	FALSE	F	0.742	non-black
576	OUTPATIENT	*Unspecified	Final result	1	4511-06-30	4511-06-30	Yes	CREATININE	1	0.81618	4510-01-29	0	NA	NA	Inf	3	4510-01-29	1	1	0	1	1	FALSE	293	28	1.8	NA	1.02	0	0	0	0	0	1	NA	Inf	FALSE	Hispanic or Latino	QUIT	64	Female	TRUE	FALSE	FALSE	FALSE	FALSE	F	0.742	non-black
577	OUTPATIENT	*Unspecified	Final result	0.63	4511-06-21	4511-06-21	Yes	CREATININE	0.63	0.81618	4510-01-29	0	NA	NA	Inf	3	4510-01-29	1	1	0	1	1	FALSE	293	28	1.8	NA	1.02	0	0	0	0	0	1	NA	Inf	FALSE	Hispanic or Latino	QUIT	64	Female	TRUE	FALSE	FALSE	FALSE	FALSE	F	0.742	non-black
578	OUTPATIENT	*Unspecified	Final result	0.7	4511-06-28	4511-06-28	Yes	CREATININE	0.7	0.81618	4510-01-29	0	NA	NA	Inf	3	4510-01-29	1	1	0	1	1	FALSE	293	28	1.8	NA	1.02	0	0	0	0	0	1	NA	Inf	FALSE	Hispanic or Latino	QUIT	64	Female	TRUE	FALSE	FALSE	FALSE	FALSE	F	0.742	non-black
579	OUTPATIENT	*Unspecified	Final result	0.74	4511-06-27	4511-06-27	Yes	CREATININE	0.74	0.81618	4510-01-29	0	NA	NA	Inf	3	4510-01-29	1	1	0	1	1	FALSE	293	28	1.8	NA	1.02	0	0	0	0	0	1	NA	Inf	FALSE	Hispanic or Latino	QUIT	64	Female	TRUE	FALSE	FALSE	FALSE	FALSE	F	0.742	non-black
580	OUTPATIENT	Low	Final result	0.64	4510-06-20	4510-06-20	Yes	CREATININE	0.64	1.27652	4510-02-04	0	NA	NA	Inf	8	4510-02-04	7	1	1	0	0	FALSE	NA	NA	NA	NA	NA	0	0	0	0	0	1	NA	Inf	FALSE	NOT Hispanic or Latino	QUIT	56	Male	FALSE	TRUE	FALSE	FALSE	TRUE	M	1	non-black
581	OUTPATIENT	*Unspecified	Final result	0.76	4510-05-21	4510-05-21	Yes	CREATININE	0.76	1.27652	4510-02-04	0	NA	NA	Inf	8	4510-02-04	7	1	1	0	0	FALSE	NA	NA	NA	NA	NA	0	0	0	0	0	1	NA	Inf	FALSE	NOT Hispanic or Latino	QUIT	56	Male	FALSE	TRUE	FALSE	FALSE	TRUE	M	1	non-black
582	OUTPATIENT	*Unspecified	Final result	0.72	4510-06-21	4510-06-21	Yes	CREATININE	0.72	1.27652	4510-02-04	0	NA	NA	Inf	8	4510-02-04	7	1	1	0	0	FALSE	NA	NA	NA	NA	NA	0	0	0	0	0	1	NA	Inf	FALSE	NOT Hispanic or Latino	QUIT	56	Male	FALSE	TRUE	FALSE	FALSE	TRUE	M	1	non-black
583	OUTPATIENT	Low	Final result	0.67	4510-06-20	4510-06-20	Yes	CREATININE	0.67	1.27652	4510-02-04	0	NA	NA	Inf	8	4510-02-04	7	1	1	0	0	FALSE	NA	NA	NA	NA	NA	0	0	0	0	0	1	NA	Inf	FALSE	NOT Hispanic or Latino	QUIT	56	Male	FALSE	TRUE	FALSE	FALSE	TRUE	M	1	non-black
584	OUTPATIENT	*Unspecified	Final result	0.54	4510-02-13	4510-02-13	Yes	CREATININE	0.54	0.47	4510-02-11	0	NA	NA	Inf	18	4510-02-11	13	2	1	1	1	FALSE	285	18	1.1	NA	0.54	0	0	0	0	663.277	2.82819	4510-01-30	Inf	FALSE	Hispanic or Latino	NEVER	82	Female	FALSE	TRUE	TRUE	FALSE	TRUE	F	0.742	non-black
585	OUTPATIENT	*Unspecified	Final result	0.54	4510-02-11	4510-02-11	Yes	CREATININE	0.54	0.47	4510-02-11	0	NA	NA	Inf	18	4510-02-11	13	2	1	1	1	FALSE	285	18	1.1	NA	0.54	0	0	0	0	663.277	2.82819	4510-01-30	Inf	FALSE	Hispanic or Latino	NEVER	82	Female	FALSE	TRUE	TRUE	FALSE	TRUE	F	0.742	non-black
586	OUTPATIENT	*Unspecified	Final result	0.69	4510-02-14	4510-02-14	Yes	CREATININE	0.69	0.47	4510-02-11	0	NA	NA	Inf	18	4510-02-11	13	2	1	1	1	FALSE	285	18	1.1	NA	0.54	0	0	0	0	663.277	2.82819	4510-01-30	Inf	FALSE	Hispanic or Latino	NEVER	82	Female	FALSE	TRUE	TRUE	FALSE	TRUE	F	0.742	non-black
587	OUTPATIENT	*Unspecified	Final result	0.56	4510-02-12	4510-02-12	Yes	CREATININE	0.56	0.47	4510-02-11	0	NA	NA	Inf	18	4510-02-11	13	2	1	1	1	FALSE	285	18	1.1	NA	0.54	0	0	0	0	663.277	2.82819	4510-01-30	Inf	FALSE	Hispanic or Latino	NEVER	82	Female	FALSE	TRUE	TRUE	FALSE	TRUE	F	0.742	non-black
588	OUTPATIENT	High	Final result	3.91	4510-02-08	4510-02-08	Yes	CREATININE	3.91	3.8	4510-02-08	3	4510-02-07	4510-02-07	7	9	4510-02-08	8	1	0	4	1	FALSE	361	34	1.7	NA	3.91	1	0	1	1	0	1	NA	-1	FALSE	NOT Hispanic or Latino	NEVER	70	Female	FALSE	TRUE	TRUE	TRUE	TRUE	F	0.742	non-black
589	OUTPATIENT	High	Final result	6.41	4510-09-10	4510-09-10	Yes	CREATININE	6.41	3.8	4510-02-08	3	4510-02-07	4510-02-07	7	9	4510-02-08	8	1	0	4	1	FALSE	361	34	1.7	NA	3.91	1	0	1	1	0	1	NA	-1	FALSE	NOT Hispanic or Latino	NEVER	70	Female	FALSE	TRUE	TRUE	TRUE	TRUE	F	0.742	non-black
590	OUTPATIENT	High	Final result	5.67	4510-09-08	4510-09-08	Yes	CREATININE	5.67	3.8	4510-02-08	3	4510-02-07	4510-02-07	7	9	4510-02-08	8	1	0	4	1	FALSE	361	34	1.7	NA	3.91	1	0	1	1	0	1	NA	-1	FALSE	NOT Hispanic or Latino	NEVER	70	Female	FALSE	TRUE	TRUE	TRUE	TRUE	F	0.742	non-black
591	OUTPATIENT	High	Final result	4.46	4510-09-07	4510-09-07	Yes	CREATININE	4.46	3.8	4510-02-08	3	4510-02-07	4510-02-07	7	9	4510-02-08	8	1	0	4	1	FALSE	361	34	1.7	NA	3.91	1	0	1	1	0	1	NA	-1	FALSE	NOT Hispanic or Latino	NEVER	70	Female	FALSE	TRUE	TRUE	TRUE	TRUE	F	0.742	non-black
592	OUTPATIENT	High	Final result	3.3	4510-09-07	4510-09-07	Yes	CREATININE	3.3	3.8	4510-02-08	3	4510-02-07	4510-02-07	7	9	4510-02-08	8	1	0	4	1	FALSE	361	34	1.7	NA	3.91	1	0	1	1	0	1	NA	-1	FALSE	NOT Hispanic or Latino	NEVER	70	Female	FALSE	TRUE	TRUE	TRUE	TRUE	F	0.742	non-black
593	OUTPATIENT	High	Final result	5.54	4510-07-19	4510-07-19	Yes	CREATININE	5.54	3.8	4510-02-08	3	4510-02-07	4510-02-07	7	9	4510-02-08	8	1	0	4	1	FALSE	361	34	1.7	NA	3.91	1	0	1	1	0	1	NA	-1	FALSE	NOT Hispanic or Latino	NEVER	70	Female	FALSE	TRUE	TRUE	TRUE	TRUE	F	0.742	non-black
594	OUTPATIENT	High	Final result	4.79	4511-01-25	4511-01-25	Yes	CREATININE	4.79	3.8	4510-02-08	3	4510-02-07	4510-02-07	7	9	4510-02-08	8	1	0	4	1	FALSE	361	34	1.7	NA	3.91	1	0	1	1	0	1	NA	-1	FALSE	NOT Hispanic or Latino	NEVER	70	Female	FALSE	TRUE	TRUE	TRUE	TRUE	F	0.742	non-black
595	OUTPATIENT	High	Final result	4.36	4510-07-20	4510-07-20	Yes	CREATININE	4.36	3.8	4510-02-08	3	4510-02-07	4510-02-07	7	9	4510-02-08	8	1	0	4	1	FALSE	361	34	1.7	NA	3.91	1	0	1	1	0	1	NA	-1	FALSE	NOT Hispanic or Latino	NEVER	70	Female	FALSE	TRUE	TRUE	TRUE	TRUE	F	0.742	non-black
596	OUTPATIENT	High	Final result	4.45	4510-07-18	4510-07-18	Yes	CREATININE	4.45	3.8	4510-02-08	3	4510-02-07	4510-02-07	7	9	4510-02-08	8	1	0	4	1	FALSE	361	34	1.7	NA	3.91	1	0	1	1	0	1	NA	-1	FALSE	NOT Hispanic or Latino	NEVER	70	Female	FALSE	TRUE	TRUE	TRUE	TRUE	F	0.742	non-black
597	OUTPATIENT	High	Final result	5.84	4511-01-25	4511-01-25	Yes	CREATININE	5.84	3.8	4510-02-08	3	4510-02-07	4510-02-07	7	9	4510-02-08	8	1	0	4	1	FALSE	361	34	1.7	NA	3.91	1	0	1	1	0	1	NA	-1	FALSE	NOT Hispanic or Latino	NEVER	70	Female	FALSE	TRUE	TRUE	TRUE	TRUE	F	0.742	non-black
598	OUTPATIENT	High	Final result	2.61	4510-03-06	4510-03-06	Yes	CREATININE	2.61	0.773268	4510-02-02	2	4510-01-31	4510-02-02	0	5	4510-02-02	2	1	0	4	2	FALSE	191	28	NA	NA	2.4	1	0	0	1	0	1	NA	-2	FALSE	Hispanic or Latino	QUIT	87	Female	TRUE	FALSE	FALSE	TRUE	FALSE	F	0.742	non-black
599	OUTPATIENT	High	Final result	2.4	4510-03-11	4510-03-11	Yes	CREATININE	2.4	0.773268	4510-02-02	2	4510-01-31	4510-02-02	0	5	4510-02-02	2	1	0	4	2	FALSE	191	28	NA	NA	2.4	1	0	0	1	0	1	NA	-2	FALSE	Hispanic or Latino	QUIT	87	Female	TRUE	FALSE	FALSE	TRUE	FALSE	F	0.742	non-black
600	OUTPATIENT	High	Final result	1.63	4511-01-20	4511-01-20	Yes	CREATININE	1.63	0.773268	4510-02-02	2	4510-01-31	4510-02-02	0	5	4510-02-02	2	1	0	4	2	FALSE	191	28	NA	NA	2.4	1	0	0	1	0	1	NA	-2	FALSE	Hispanic or Latino	QUIT	87	Female	TRUE	FALSE	FALSE	TRUE	FALSE	F	0.742	non-black
601	OUTPATIENT	*Unspecified	Final result	0.75	4510-03-05	4510-03-06	Yes	CREATININE	0.75	0.68	4510-02-02	0	NA	NA	Inf	5	4510-02-02	1	1	0	0	0	FALSE	311	12	1.3	NA	0.71	0	0	0	0	0	1	NA	Inf	FALSE	Hispanic or Latino	NEVER	72	Female	FALSE	TRUE	FALSE	FALSE	TRUE	F	0.742	non-black
602	OUTPATIENT	*Unspecified	Final result	0.7	4510-05-01	4510-05-01	Yes	CREATININE	0.7	0.68	4510-02-02	0	NA	NA	Inf	5	4510-02-02	1	1	0	0	0	FALSE	311	12	1.3	NA	0.71	0	0	0	0	0	1	NA	Inf	FALSE	Hispanic or Latino	NEVER	72	Female	FALSE	TRUE	FALSE	FALSE	TRUE	F	0.742	non-black
603	OUTPATIENT	*Unspecified	Final result	0.8	4510-02-22	4510-02-22	Yes	CREATININE	0.8	0.68	4510-02-02	0	NA	NA	Inf	5	4510-02-02	1	1	0	0	0	FALSE	311	12	1.3	NA	0.71	0	0	0	0	0	1	NA	Inf	FALSE	Hispanic or Latino	NEVER	72	Female	FALSE	TRUE	FALSE	FALSE	TRUE	F	0.742	non-black
604	OUTPATIENT	*Unspecified	Final result	0.85	4510-07-03	4510-07-03	Yes	CREATININE	0.85	0.68	4510-02-02	0	NA	NA	Inf	5	4510-02-02	1	1	0	0	0	FALSE	311	12	1.3	NA	0.71	0	0	0	0	0	1	NA	Inf	FALSE	Hispanic or Latino	NEVER	72	Female	FALSE	TRUE	FALSE	FALSE	TRUE	F	0.742	non-black
605	OUTPATIENT	*Unspecified	Final result	0.86	4511-07-14	4511-07-14	Yes	CREATININE	0.86	0.68	4510-02-02	0	NA	NA	Inf	5	4510-02-02	1	1	0	0	0	FALSE	311	12	1.3	NA	0.71	0	0	0	0	0	1	NA	Inf	FALSE	Hispanic or Latino	NEVER	72	Female	FALSE	TRUE	FALSE	FALSE	TRUE	F	0.742	non-black
606	OUTPATIENT	*Unspecified	Final result	0.98	4510-02-05	4510-02-05	Yes	CREATININE	0.98	0.68	4510-02-02	0	NA	NA	Inf	5	4510-02-02	1	1	0	0	0	FALSE	311	12	1.3	NA	0.71	0	0	0	0	0	1	NA	Inf	FALSE	Hispanic or Latino	NEVER	72	Female	FALSE	TRUE	FALSE	FALSE	TRUE	F	0.742	non-black
607	OUTPATIENT	*Unspecified	Final result	0.99	4510-02-03	4510-02-03	Yes	CREATININE	0.99	0.68	4510-02-02	0	NA	NA	Inf	5	4510-02-02	1	1	0	0	0	FALSE	311	12	1.3	NA	0.71	0	0	0	0	0	1	NA	Inf	FALSE	Hispanic or Latino	NEVER	72	Female	FALSE	TRUE	FALSE	FALSE	TRUE	F	0.742	non-black
608	OUTPATIENT	*Unspecified	Final result	0.92	4510-02-04	4510-02-04	Yes	CREATININE	0.92	0.68	4510-02-02	0	NA	NA	Inf	5	4510-02-02	1	1	0	0	0	FALSE	311	12	1.3	NA	0.71	0	0	0	0	0	1	NA	Inf	FALSE	Hispanic or Latino	NEVER	72	Female	FALSE	TRUE	FALSE	FALSE	TRUE	F	0.742	non-black
609	OUTPATIENT	*Unspecified	Final result	0.71	4510-02-02	4510-02-02	Yes	CREATININE	0.71	0.68	4510-02-02	0	NA	NA	Inf	5	4510-02-02	1	1	0	0	0	FALSE	311	12	1.3	NA	0.71	0	0	0	0	0	1	NA	Inf	FALSE	Hispanic or Latino	NEVER	72	Female	FALSE	TRUE	FALSE	FALSE	TRUE	F	0.742	non-black
610	OUTPATIENT	*Unspecified	Final result	0.66	4510-05-06	4510-05-06	Yes	CREATININE	0.66	0.68	4510-02-02	0	NA	NA	Inf	5	4510-02-02	1	1	0	0	0	FALSE	311	12	1.3	NA	0.71	0	0	0	0	0	1	NA	Inf	FALSE	Hispanic or Latino	NEVER	72	Female	FALSE	TRUE	FALSE	FALSE	TRUE	F	0.742	non-black
611	OUTPATIENT	*Unspecified	Final result	0.62	4510-05-05	4510-05-05	Yes	CREATININE	0.62	0.68	4510-02-02	0	NA	NA	Inf	5	4510-02-02	1	1	0	0	0	FALSE	311	12	1.3	NA	0.71	0	0	0	0	0	1	NA	Inf	FALSE	Hispanic or Latino	NEVER	72	Female	FALSE	TRUE	FALSE	FALSE	TRUE	F	0.742	non-black
612	OUTPATIENT	*Unspecified	Final result	0.73	4510-05-08	4510-05-08	Yes	CREATININE	0.73	0.68	4510-02-02	0	NA	NA	Inf	5	4510-02-02	1	1	0	0	0	FALSE	311	12	1.3	NA	0.71	0	0	0	0	0	1	NA	Inf	FALSE	Hispanic or Latino	NEVER	72	Female	FALSE	TRUE	FALSE	FALSE	TRUE	F	0.742	non-black
613	OUTPATIENT	*Unspecified	Final result	0.81	4511-04-16	4511-04-17	Yes	CREATININE	0.81	0.68	4510-02-02	0	NA	NA	Inf	5	4510-02-02	1	1	0	0	0	FALSE	311	12	1.3	NA	0.71	0	0	0	0	0	1	NA	Inf	FALSE	Hispanic or Latino	NEVER	72	Female	FALSE	TRUE	FALSE	FALSE	TRUE	F	0.742	non-black
614	OUTPATIENT	*Unspecified	Final result	0.92	4510-12-05	4510-12-06	Yes	CREATININE	0.92	0.68	4510-02-02	0	NA	NA	Inf	5	4510-02-02	1	1	0	0	0	FALSE	311	12	1.3	NA	0.71	0	0	0	0	0	1	NA	Inf	FALSE	Hispanic or Latino	NEVER	72	Female	FALSE	TRUE	FALSE	FALSE	TRUE	F	0.742	non-black
615	OUTPATIENT	*Unspecified	Final result	0.78	4511-04-02	4511-04-02	Yes	CREATININE	0.78	0.68	4510-02-02	0	NA	NA	Inf	5	4510-02-02	1	1	0	0	0	FALSE	311	12	1.3	NA	0.71	0	0	0	0	0	1	NA	Inf	FALSE	Hispanic or Latino	NEVER	72	Female	FALSE	TRUE	FALSE	FALSE	TRUE	F	0.742	non-black
616	OUTPATIENT	*Unspecified	Final result	0.84	4510-10-13	4510-10-14	Yes	CREATININE	0.84	0.68	4510-02-02	0	NA	NA	Inf	5	4510-02-02	1	1	0	0	0	FALSE	311	12	1.3	NA	0.71	0	0	0	0	0	1	NA	Inf	FALSE	Hispanic or Latino	NEVER	72	Female	FALSE	TRUE	FALSE	FALSE	TRUE	F	0.742	non-black
617	OUTPATIENT	*Unspecified	Final result	0.61	4510-05-05	4510-05-05	Yes	CREATININE	0.61	0.68	4510-02-02	0	NA	NA	Inf	5	4510-02-02	1	1	0	0	0	FALSE	311	12	1.3	NA	0.71	0	0	0	0	0	1	NA	Inf	FALSE	Hispanic or Latino	NEVER	72	Female	FALSE	TRUE	FALSE	FALSE	TRUE	F	0.742	non-black
618	OUTPATIENT	*Unspecified	Final result	0.7	4510-02-03	4510-02-03	Yes	CREATININE	0.7	0.64	4510-02-03	0	NA	NA	Inf	4	4510-02-03	1	#NAME?	0	1	1	FALSE	227	6	1.6	NA	0.7	0	0	0	0	0	1	NA	Inf	FALSE	Hispanic or Latino	QUIT	21	Male	FALSE	FALSE	FALSE	FALSE	FALSE	M	1	non-black
619	OUTPATIENT	*Unspecified	Final result	0.75	4510-02-05	4510-02-05	Yes	CREATININE	0.75	0.64	4510-02-03	0	NA	NA	Inf	4	4510-02-03	1	#NAME?	0	1	1	FALSE	227	6	1.6	NA	0.7	0	0	0	0	0	1	NA	Inf	FALSE	Hispanic or Latino	QUIT	21	Male	FALSE	FALSE	FALSE	FALSE	FALSE	M	1	non-black
620	OUTPATIENT	*Unspecified	Final result	0.7	4510-02-04	4510-02-04	Yes	CREATININE	0.7	0.64	4510-02-03	0	NA	NA	Inf	4	4510-02-03	1	#NAME?	0	1	1	FALSE	227	6	1.6	NA	0.7	0	0	0	0	0	1	NA	Inf	FALSE	Hispanic or Latino	QUIT	21	Male	FALSE	FALSE	FALSE	FALSE	FALSE	M	1	non-black
621	OUTPATIENT	*Unspecified	Final result	0.84	4510-02-03	4510-02-03	Yes	CREATININE	0.84	0.991981	4510-02-03	0	NA	NA	Inf	2	4510-02-03	1	1	0	0	0	FALSE	NA	NA	NA	NA	NA	0	0	0	0	0	1	NA	Inf	FALSE	NOT Hispanic or Latino	QUIT	54	Female	FALSE	FALSE	FALSE	FALSE	FALSE	F	0.742	non-black
622	OUTPATIENT	*Unspecified	Final result	0.79	4510-07-03	4510-07-04	Yes	CREATININE	0.79	0.991981	4510-02-03	0	NA	NA	Inf	2	4510-02-03	1	1	0	0	0	FALSE	NA	NA	NA	NA	NA	0	0	0	0	0	1	NA	Inf	FALSE	NOT Hispanic or Latino	QUIT	54	Female	FALSE	FALSE	FALSE	FALSE	FALSE	F	0.742	non-black
623	OUTPATIENT	*Unspecified	Final result	0.93	4510-03-10	4510-03-11	Yes	CREATININE	0.93	0.991981	4510-02-03	0	NA	NA	Inf	2	4510-02-03	1	1	0	0	0	FALSE	NA	NA	NA	NA	NA	0	0	0	0	0	1	NA	Inf	FALSE	NOT Hispanic or Latino	QUIT	54	Female	FALSE	FALSE	FALSE	FALSE	FALSE	F	0.742	non-black
624	OUTPATIENT	*Unspecified	Final result	0.97	4511-02-18	4511-02-19	Yes	CREATININE	0.97	0.991981	4510-02-03	0	NA	NA	Inf	2	4510-02-03	1	1	0	0	0	FALSE	NA	NA	NA	NA	NA	0	0	0	0	0	1	NA	Inf	FALSE	NOT Hispanic or Latino	QUIT	54	Female	FALSE	FALSE	FALSE	FALSE	FALSE	F	0.742	non-black
625	OUTPATIENT	*Unspecified	Final result	0.89	4510-10-17	4510-10-18	Yes	CREATININE	0.89	0.991981	4510-02-03	0	NA	NA	Inf	2	4510-02-03	1	1	0	0	0	FALSE	NA	NA	NA	NA	NA	0	0	0	0	0	1	NA	Inf	FALSE	NOT Hispanic or Latino	QUIT	54	Female	FALSE	FALSE	FALSE	FALSE	FALSE	F	0.742	non-black
626	OUTPATIENT	High	Final result	2.64	4510-05-05	4510-05-05	Yes	CREATININE	2.64	2	4510-02-03	0	NA	NA	Inf	6	4510-02-03	1	1	0	4	2	FALSE	333	28	1.4	NA	3.37	0	0	1	1	0	1	NA	Inf	FALSE	Hispanic or Latino	QUIT	65	Male	FALSE	TRUE	FALSE	FALSE	TRUE	M	1	non-black
627	OUTPATIENT	High	Final result	2.47	4510-05-04	4510-05-04	Yes	CREATININE	2.47	2	4510-02-03	0	NA	NA	Inf	6	4510-02-03	1	1	0	4	2	FALSE	333	28	1.4	NA	3.37	0	0	1	1	0	1	NA	Inf	FALSE	Hispanic or Latino	QUIT	65	Male	FALSE	TRUE	FALSE	FALSE	TRUE	M	1	non-black
628	OUTPATIENT	High	Final result	2.67	4511-03-22	4511-03-22	Yes	CREATININE	2.67	2	4510-02-03	0	NA	NA	Inf	6	4510-02-03	1	1	0	4	2	FALSE	333	28	1.4	NA	3.37	0	0	1	1	0	1	NA	Inf	FALSE	Hispanic or Latino	QUIT	65	Male	FALSE	TRUE	FALSE	FALSE	TRUE	M	1	non-black
629	OUTPATIENT	Low	Final result	0.38	4510-02-15	4510-02-15	Yes	CREATININE	0.38	1.07608	4510-02-15	0	NA	NA	Inf	9	4510-02-15	7	1	1	4	4	FALSE	623	6	1.6	NA	0.38	0	0	0	0	0	1	NA	Inf	FALSE	Hispanic or Latino	NEVER	34	Female	FALSE	TRUE	FALSE	TRUE	FALSE	F	0.742	non-black
630	OUTPATIENT	Low	Final result	0.43	4510-03-18	4510-03-18	Yes	CREATININE	0.43	1.07608	4510-02-15	0	NA	NA	Inf	9	4510-02-15	7	1	1	4	4	FALSE	623	6	1.6	NA	0.38	0	0	0	0	0	1	NA	Inf	FALSE	Hispanic or Latino	NEVER	34	Female	FALSE	TRUE	FALSE	TRUE	FALSE	F	0.742	non-black
631	OUTPATIENT	*Unspecified	Final result	0.5	4510-07-04	4510-07-04	Yes	CREATININE	0.5	1.07608	4510-02-15	0	NA	NA	Inf	9	4510-02-15	7	1	1	4	4	FALSE	623	6	1.6	NA	0.38	0	0	0	0	0	1	NA	Inf	FALSE	Hispanic or Latino	NEVER	34	Female	FALSE	TRUE	FALSE	TRUE	FALSE	F	0.742	non-black
632	OUTPATIENT	Low	Final result	0.37	4510-02-16	4510-02-16	Yes	CREATININE	0.37	1.07608	4510-02-15	0	NA	NA	Inf	9	4510-02-15	7	1	1	4	4	FALSE	623	6	1.6	NA	0.38	0	0	0	0	0	1	NA	Inf	FALSE	Hispanic or Latino	NEVER	34	Female	FALSE	TRUE	FALSE	TRUE	FALSE	F	0.742	non-black
633	OUTPATIENT	*Unspecified	Final result	0.51	4511-02-27	4511-02-27	Yes	CREATININE	0.51	1.07608	4510-02-15	0	NA	NA	Inf	9	4510-02-15	7	1	1	4	4	FALSE	623	6	1.6	NA	0.38	0	0	0	0	0	1	NA	Inf	FALSE	Hispanic or Latino	NEVER	34	Female	FALSE	TRUE	FALSE	TRUE	FALSE	F	0.742	non-black
634	OUTPATIENT	*Unspecified	Final result	0.51	4510-11-28	4510-11-28	Yes	CREATININE	0.51	1.07608	4510-02-15	0	NA	NA	Inf	9	4510-02-15	7	1	1	4	4	FALSE	623	6	1.6	NA	0.38	0	0	0	0	0	1	NA	Inf	FALSE	Hispanic or Latino	NEVER	34	Female	FALSE	TRUE	FALSE	TRUE	FALSE	F	0.742	non-black
635	OUTPATIENT	Low	Final result	0.48	4510-02-05	4510-02-05	Yes	CREATININE	0.48	0.28	4510-02-05	0	NA	NA	Inf	3	4510-02-05	2	1	0	0	0	FALSE	193	9	2.2	NA	0.49	0	0	0	0	2.90825e-10	1	4510-02-03	Inf	FALSE	NOT Hispanic or Latino	NEVER	70	Female	FALSE	TRUE	TRUE	FALSE	FALSE	F	0.742	non-black
636	OUTPATIENT	Low	Final result	0.48	4510-06-26	4510-06-26	Yes	CREATININE	0.48	0.28	4510-02-05	0	NA	NA	Inf	3	4510-02-05	2	1	0	0	0	FALSE	193	9	2.2	NA	0.49	0	0	0	0	2.90825e-10	1	4510-02-03	Inf	FALSE	NOT Hispanic or Latino	NEVER	70	Female	FALSE	TRUE	TRUE	FALSE	FALSE	F	0.742	non-black
637	OUTPATIENT	Low	Final result	0.49	4510-02-05	4510-02-05	Yes	CREATININE	0.49	0.28	4510-02-05	0	NA	NA	Inf	3	4510-02-05	2	1	0	0	0	FALSE	193	9	2.2	NA	0.49	0	0	0	0	2.90825e-10	1	4510-02-03	Inf	FALSE	NOT Hispanic or Latino	NEVER	70	Female	FALSE	TRUE	TRUE	FALSE	FALSE	F	0.742	non-black
638	OUTPATIENT	Low	Final result	0.47	4510-02-05	4510-02-05	Yes	CREATININE	0.47	0.28	4510-02-05	0	NA	NA	Inf	3	4510-02-05	2	1	0	0	0	FALSE	193	9	2.2	NA	0.49	0	0	0	0	2.90825e-10	1	4510-02-03	Inf	FALSE	NOT Hispanic or Latino	NEVER	70	Female	FALSE	TRUE	TRUE	FALSE	FALSE	F	0.742	non-black
639	OUTPATIENT	Low	Final result	0.33	4511-02-17	4511-02-17	Yes	CREATININE	0.33	0.28	4510-02-05	0	NA	NA	Inf	3	4510-02-05	2	1	0	0	0	FALSE	193	9	2.2	NA	0.49	0	0	0	0	2.90825e-10	1	4510-02-03	Inf	FALSE	NOT Hispanic or Latino	NEVER	70	Female	FALSE	TRUE	TRUE	FALSE	FALSE	F	0.742	non-black
640	OUTPATIENT	Low	Final result	0.36	4510-12-05	4510-12-05	Yes	CREATININE	0.36	0.28	4510-02-05	0	NA	NA	Inf	3	4510-02-05	2	1	0	0	0	FALSE	193	9	2.2	NA	0.49	0	0	0	0	2.90825e-10	1	4510-02-03	Inf	FALSE	NOT Hispanic or Latino	NEVER	70	Female	FALSE	TRUE	TRUE	FALSE	FALSE	F	0.742	non-black
641	OUTPATIENT	Low	Final result	0.38	4511-02-17	4511-02-17	Yes	CREATININE	0.38	0.28	4510-02-05	0	NA	NA	Inf	3	4510-02-05	2	1	0	0	0	FALSE	193	9	2.2	NA	0.49	0	0	0	0	2.90825e-10	1	4510-02-03	Inf	FALSE	NOT Hispanic or Latino	NEVER	70	Female	FALSE	TRUE	TRUE	FALSE	FALSE	F	0.742	non-black
642	OUTPATIENT	High	Final result	2.31	4510-02-05	4510-02-05	Yes	CREATININE	2.31	0.92202	4510-02-05	2	4510-02-04	4510-02-06	0	9	4510-02-05	1	1	1	7	5	TRUE	161	68	17	0.4	2.31	1	0	0	1	10.2993	1.30748	4510-02-04	-1	FALSE	Hispanic or Latino	YES	32	Female	FALSE	FALSE	FALSE	FALSE	TRUE	F	0.742	non-black
643	OUTPATIENT	*Unspecified	Final result	0.59	4510-03-11	4510-03-11	Yes	CREATININE	0.59	0.92202	4510-02-05	2	4510-02-04	4510-02-06	0	9	4510-02-05	1	1	1	7	5	TRUE	161	68	17	0.4	2.31	1	0	0	1	10.2993	1.30748	4510-02-04	-1	FALSE	Hispanic or Latino	YES	32	Female	FALSE	FALSE	FALSE	FALSE	TRUE	F	0.742	non-black
644	OUTPATIENT	*Unspecified	Final result	0.55	4510-03-17	4510-03-18	Yes	CREATININE	0.55	0.92202	4510-02-05	2	4510-02-04	4510-02-06	0	9	4510-02-05	1	1	1	7	5	TRUE	161	68	17	0.4	2.31	1	0	0	1	10.2993	1.30748	4510-02-04	-1	FALSE	Hispanic or Latino	YES	32	Female	FALSE	FALSE	FALSE	FALSE	TRUE	F	0.742	non-black
645	OUTPATIENT	*Unspecified	Final result	0.63	4511-01-19	4511-01-20	Yes	CREATININE	0.63	0.92202	4510-02-05	2	4510-02-04	4510-02-06	0	9	4510-02-05	1	1	1	7	5	TRUE	161	68	17	0.4	2.31	1	0	0	1	10.2993	1.30748	4510-02-04	-1	FALSE	Hispanic or Latino	YES	32	Female	FALSE	FALSE	FALSE	FALSE	TRUE	F	0.742	non-black
646	OUTPATIENT	High	Final result	1.21	4510-02-06	4510-02-06	Yes	CREATININE	1.21	0.92202	4510-02-05	2	4510-02-04	4510-02-06	0	9	4510-02-05	1	1	1	7	5	TRUE	161	68	17	0.4	2.31	1	0	0	1	10.2993	1.30748	4510-02-04	-1	FALSE	Hispanic or Latino	YES	32	Female	FALSE	FALSE	FALSE	FALSE	TRUE	F	0.742	non-black
647	OUTPATIENT	*Unspecified	Final result	0.71	4510-02-07	4510-02-07	Yes	CREATININE	0.71	0.92202	4510-02-05	2	4510-02-04	4510-02-06	0	9	4510-02-05	1	1	1	7	5	TRUE	161	68	17	0.4	2.31	1	0	0	1	10.2993	1.30748	4510-02-04	-1	FALSE	Hispanic or Latino	YES	32	Female	FALSE	FALSE	FALSE	FALSE	TRUE	F	0.742	non-black
648	OUTPATIENT	High	Final result	2.01	4510-02-05	4510-02-05	Yes	CREATININE	2.01	0.92202	4510-02-05	2	4510-02-04	4510-02-06	0	9	4510-02-05	1	1	1	7	5	TRUE	161	68	17	0.4	2.31	1	0	0	1	10.2993	1.30748	4510-02-04	-1	FALSE	Hispanic or Latino	YES	32	Female	FALSE	FALSE	FALSE	FALSE	TRUE	F	0.742	non-black
649	OUTPATIENT	High	Final result	1.35	4510-02-05	4510-02-05	Yes	CREATININE	1.35	0.92202	4510-02-05	2	4510-02-04	4510-02-06	0	9	4510-02-05	1	1	1	7	5	TRUE	161	68	17	0.4	2.31	1	0	0	1	10.2993	1.30748	4510-02-04	-1	FALSE	Hispanic or Latino	YES	32	Female	FALSE	FALSE	FALSE	FALSE	TRUE	F	0.742	non-black
650	OUTPATIENT	*Unspecified	Final result	1.01	4510-02-06	4510-02-06	Yes	CREATININE	1.01	0.92202	4510-02-05	2	4510-02-04	4510-02-06	0	9	4510-02-05	1	1	1	7	5	TRUE	161	68	17	0.4	2.31	1	0	0	1	10.2993	1.30748	4510-02-04	-1	FALSE	Hispanic or Latino	YES	32	Female	FALSE	FALSE	FALSE	FALSE	TRUE	F	0.742	non-black
651	OUTPATIENT	*Unspecified	Final result	0.93	4510-02-06	4510-02-06	Yes	CREATININE	0.93	0.92202	4510-02-05	2	4510-02-04	4510-02-06	0	9	4510-02-05	1	1	1	7	5	TRUE	161	68	17	0.4	2.31	1	0	0	1	10.2993	1.30748	4510-02-04	-1	FALSE	Hispanic or Latino	YES	32	Female	FALSE	FALSE	FALSE	FALSE	TRUE	F	0.742	non-black
652	OUTPATIENT	*Unspecified	Final result	0.62	4510-02-11	4510-02-11	Yes	CREATININE	0.62	0.92202	4510-02-05	2	4510-02-04	4510-02-06	0	9	4510-02-05	1	1	1	7	5	TRUE	161	68	17	0.4	2.31	1	0	0	1	10.2993	1.30748	4510-02-04	-1	FALSE	Hispanic or Latino	YES	32	Female	FALSE	FALSE	FALSE	FALSE	TRUE	F	0.742	non-black
653	OUTPATIENT	*Unspecified	Final result	0.69	4510-02-07	4510-02-08	Yes	CREATININE	0.69	0.92202	4510-02-05	2	4510-02-04	4510-02-06	0	9	4510-02-05	1	1	1	7	5	TRUE	161	68	17	0.4	2.31	1	0	0	1	10.2993	1.30748	4510-02-04	-1	FALSE	Hispanic or Latino	YES	32	Female	FALSE	FALSE	FALSE	FALSE	TRUE	F	0.742	non-black
654	OUTPATIENT	High	Final result	2.93	4510-02-05	4510-02-05	Yes	CREATININE	2.93	0.92202	4510-02-05	2	4510-02-04	4510-02-06	0	9	4510-02-05	1	1	1	7	5	TRUE	161	68	17	0.4	2.31	1	0	0	1	10.2993	1.30748	4510-02-04	-1	FALSE	Hispanic or Latino	YES	32	Female	FALSE	FALSE	FALSE	FALSE	TRUE	F	0.742	non-black
655	OUTPATIENT	*Unspecified	Final result	0.65	4510-02-08	4510-02-08	Yes	CREATININE	0.65	0.92202	4510-02-05	2	4510-02-04	4510-02-06	0	9	4510-02-05	1	1	1	7	5	TRUE	161	68	17	0.4	2.31	1	0	0	1	10.2993	1.30748	4510-02-04	-1	FALSE	Hispanic or Latino	YES	32	Female	FALSE	FALSE	FALSE	FALSE	TRUE	F	0.742	non-black
656	OUTPATIENT	*Unspecified	Final result	0.68	4510-02-08	4510-02-08	Yes	CREATININE	0.68	0.92202	4510-02-05	2	4510-02-04	4510-02-06	0	9	4510-02-05	1	1	1	7	5	TRUE	161	68	17	0.4	2.31	1	0	0	1	10.2993	1.30748	4510-02-04	-1	FALSE	Hispanic or Latino	YES	32	Female	FALSE	FALSE	FALSE	FALSE	TRUE	F	0.742	non-black
657	OUTPATIENT	*Unspecified	Final result	0.61	4510-02-09	4510-02-09	Yes	CREATININE	0.61	0.92202	4510-02-05	2	4510-02-04	4510-02-06	0	9	4510-02-05	1	1	1	7	5	TRUE	161	68	17	0.4	2.31	1	0	0	1	10.2993	1.30748	4510-02-04	-1	FALSE	Hispanic or Latino	YES	32	Female	FALSE	FALSE	FALSE	FALSE	TRUE	F	0.742	non-black
658	OUTPATIENT	*Unspecified	Final result	0.71	4510-02-07	4510-02-07	Yes	CREATININE	0.71	0.92202	4510-02-05	2	4510-02-04	4510-02-06	0	9	4510-02-05	1	1	1	7	5	TRUE	161	68	17	0.4	2.31	1	0	0	1	10.2993	1.30748	4510-02-04	-1	FALSE	Hispanic or Latino	YES	32	Female	FALSE	FALSE	FALSE	FALSE	TRUE	F	0.742	non-black
659	OUTPATIENT	*Unspecified	Final result	0.7	4510-02-06	4510-02-07	Yes	CREATININE	0.7	0.92202	4510-02-05	2	4510-02-04	4510-02-06	0	9	4510-02-05	1	1	1	7	5	TRUE	161	68	17	0.4	2.31	1	0	0	1	10.2993	1.30748	4510-02-04	-1	FALSE	Hispanic or Latino	YES	32	Female	FALSE	FALSE	FALSE	FALSE	TRUE	F	0.742	non-black
660	OUTPATIENT	*Unspecified	Final result	0.86	4510-02-06	4510-02-06	Yes	CREATININE	0.86	0.92202	4510-02-05	2	4510-02-04	4510-02-06	0	9	4510-02-05	1	1	1	7	5	TRUE	161	68	17	0.4	2.31	1	0	0	1	10.2993	1.30748	4510-02-04	-1	FALSE	Hispanic or Latino	YES	32	Female	FALSE	FALSE	FALSE	FALSE	TRUE	F	0.742	non-black
661	OUTPATIENT	*Unspecified	Final result	0.64	4510-02-10	4510-02-10	Yes	CREATININE	0.64	0.92202	4510-02-05	2	4510-02-04	4510-02-06	0	9	4510-02-05	1	1	1	7	5	TRUE	161	68	17	0.4	2.31	1	0	0	1	10.2993	1.30748	4510-02-04	-1	FALSE	Hispanic or Latino	YES	32	Female	FALSE	FALSE	FALSE	FALSE	TRUE	F	0.742	non-black
662	OUTPATIENT	*Unspecified	Final result	0.58	4510-02-12	4510-02-12	Yes	CREATININE	0.58	0.92202	4510-02-05	2	4510-02-04	4510-02-06	0	9	4510-02-05	1	1	1	7	5	TRUE	161	68	17	0.4	2.31	1	0	0	1	10.2993	1.30748	4510-02-04	-1	FALSE	Hispanic or Latino	YES	32	Female	FALSE	FALSE	FALSE	FALSE	TRUE	F	0.742	non-black
663	OUTPATIENT	*Unspecified	Final result	0.65	4510-02-09	4510-02-09	Yes	CREATININE	0.65	0.92202	4510-02-05	2	4510-02-04	4510-02-06	0	9	4510-02-05	1	1	1	7	5	TRUE	161	68	17	0.4	2.31	1	0	0	1	10.2993	1.30748	4510-02-04	-1	FALSE	Hispanic or Latino	YES	32	Female	FALSE	FALSE	FALSE	FALSE	TRUE	F	0.742	non-black
664	OUTPATIENT	*Unspecified	Final result	0.95	4510-02-06	4510-02-06	Yes	CREATININE	0.95	0.92202	4510-02-05	2	4510-02-04	4510-02-06	0	9	4510-02-05	1	1	1	7	5	TRUE	161	68	17	0.4	2.31	1	0	0	1	10.2993	1.30748	4510-02-04	-1	FALSE	Hispanic or Latino	YES	32	Female	FALSE	FALSE	FALSE	FALSE	TRUE	F	0.742	non-black
665	OUTPATIENT	High	Final result	1.69	4510-02-05	4510-02-06	Yes	CREATININE	1.69	0.92202	4510-02-05	2	4510-02-04	4510-02-06	0	9	4510-02-05	1	1	1	7	5	TRUE	161	68	17	0.4	2.31	1	0	0	1	10.2993	1.30748	4510-02-04	-1	FALSE	Hispanic or Latino	YES	32	Female	FALSE	FALSE	FALSE	FALSE	TRUE	F	0.742	non-black
666	OUTPATIENT	High	Final result	1.15	4510-02-06	4510-02-06	Yes	CREATININE	1.15	0.92202	4510-02-05	2	4510-02-04	4510-02-06	0	9	4510-02-05	1	1	1	7	5	TRUE	161	68	17	0.4	2.31	1	0	0	1	10.2993	1.30748	4510-02-04	-1	FALSE	Hispanic or Latino	YES	32	Female	FALSE	FALSE	FALSE	FALSE	TRUE	F	0.742	non-black
667	OUTPATIENT	High	Final result	1.46	4510-02-05	4510-02-05	Yes	CREATININE	1.46	0.92202	4510-02-05	2	4510-02-04	4510-02-06	0	9	4510-02-05	1	1	1	7	5	TRUE	161	68	17	0.4	2.31	1	0	0	1	10.2993	1.30748	4510-02-04	-1	FALSE	Hispanic or Latino	YES	32	Female	FALSE	FALSE	FALSE	FALSE	TRUE	F	0.742	non-black
668	OUTPATIENT	*Unspecified	Final result	0.76	4510-02-07	4510-02-07	Yes	CREATININE	0.76	0.92202	4510-02-05	2	4510-02-04	4510-02-06	0	9	4510-02-05	1	1	1	7	5	TRUE	161	68	17	0.4	2.31	1	0	0	1	10.2993	1.30748	4510-02-04	-1	FALSE	Hispanic or Latino	YES	32	Female	FALSE	FALSE	FALSE	FALSE	TRUE	F	0.742	non-black
669	OUTPATIENT	High	Final result	2.39	4510-02-15	4510-02-15	Yes	CREATININE	2.39	1.03285	4510-02-06	3	4510-02-04	4510-03-14	0	39	4510-02-06	2	3	3	12	12	TRUE	125	73	0.3	NA	1.69	1	1	1	1	0	1	NA	-2	FALSE	Hispanic or Latino	QUIT	73	Male	TRUE	FALSE	TRUE	TRUE	FALSE	M	1	non-black
670	OUTPATIENT	High	Final result	1.59	4510-02-08	4510-02-08	Yes	CREATININE	1.59	1.03285	4510-02-06	3	4510-02-04	4510-03-14	0	39	4510-02-06	2	3	3	12	12	TRUE	125	73	0.3	NA	1.69	1	1	1	1	0	1	NA	-2	FALSE	Hispanic or Latino	QUIT	73	Male	TRUE	FALSE	TRUE	TRUE	FALSE	M	1	non-black
671	OUTPATIENT	*Unspecified	Final result	1.06	4510-02-24	4510-02-24	Yes	CREATININE	1.06	1.03285	4510-02-06	3	4510-02-04	4510-03-14	0	39	4510-02-06	2	3	3	12	12	TRUE	125	73	0.3	NA	1.69	1	1	1	1	0	1	NA	-2	FALSE	Hispanic or Latino	QUIT	73	Male	TRUE	FALSE	TRUE	TRUE	FALSE	M	1	non-black
672	OUTPATIENT	High	Final result	2.53	4510-02-20	4510-02-20	Yes	CREATININE	2.53	1.03285	4510-02-06	3	4510-02-04	4510-03-14	0	39	4510-02-06	2	3	3	12	12	TRUE	125	73	0.3	NA	1.69	1	1	1	1	0	1	NA	-2	FALSE	Hispanic or Latino	QUIT	73	Male	TRUE	FALSE	TRUE	TRUE	FALSE	M	1	non-black
673	OUTPATIENT	High	Final result	2.26	4510-02-25	4510-02-25	Yes	CREATININE	2.26	1.03285	4510-02-06	3	4510-02-04	4510-03-14	0	39	4510-02-06	2	3	3	12	12	TRUE	125	73	0.3	NA	1.69	1	1	1	1	0	1	NA	-2	FALSE	Hispanic or Latino	QUIT	73	Male	TRUE	FALSE	TRUE	TRUE	FALSE	M	1	non-black
674	OUTPATIENT	High	Final result	2.31	4510-03-06	4510-03-06	Yes	CREATININE	2.31	1.03285	4510-02-06	3	4510-02-04	4510-03-14	0	39	4510-02-06	2	3	3	12	12	TRUE	125	73	0.3	NA	1.69	1	1	1	1	0	1	NA	-2	FALSE	Hispanic or Latino	QUIT	73	Male	TRUE	FALSE	TRUE	TRUE	FALSE	M	1	non-black
675	OUTPATIENT	*Unspecified	Final result	1.09	4510-02-24	4510-02-24	Yes	CREATININE	1.09	1.03285	4510-02-06	3	4510-02-04	4510-03-14	0	39	4510-02-06	2	3	3	12	12	TRUE	125	73	0.3	NA	1.69	1	1	1	1	0	1	NA	-2	FALSE	Hispanic or Latino	QUIT	73	Male	TRUE	FALSE	TRUE	TRUE	FALSE	M	1	non-black
676	OUTPATIENT	*Unspecified	Final result	0.97	4510-02-23	4510-02-23	Yes	CREATININE	0.97	1.03285	4510-02-06	3	4510-02-04	4510-03-14	0	39	4510-02-06	2	3	3	12	12	TRUE	125	73	0.3	NA	1.69	1	1	1	1	0	1	NA	-2	FALSE	Hispanic or Latino	QUIT	73	Male	TRUE	FALSE	TRUE	TRUE	FALSE	M	1	non-black
677	OUTPATIENT	High	Final result	2.44	4510-02-13	4510-02-13	Yes	CREATININE	2.44	1.03285	4510-02-06	3	4510-02-04	4510-03-14	0	39	4510-02-06	2	3	3	12	12	TRUE	125	73	0.3	NA	1.69	1	1	1	1	0	1	NA	-2	FALSE	Hispanic or Latino	QUIT	73	Male	TRUE	FALSE	TRUE	TRUE	FALSE	M	1	non-black
678	OUTPATIENT	High	Final result	3.07	4510-02-26	4510-02-26	Yes	CREATININE	3.07	1.03285	4510-02-06	3	4510-02-04	4510-03-14	0	39	4510-02-06	2	3	3	12	12	TRUE	125	73	0.3	NA	1.69	1	1	1	1	0	1	NA	-2	FALSE	Hispanic or Latino	QUIT	73	Male	TRUE	FALSE	TRUE	TRUE	FALSE	M	1	non-black
679	OUTPATIENT	High	Final result	2.65	4510-02-20	4510-02-20	Yes	CREATININE	2.65	1.03285	4510-02-06	3	4510-02-04	4510-03-14	0	39	4510-02-06	2	3	3	12	12	TRUE	125	73	0.3	NA	1.69	1	1	1	1	0	1	NA	-2	FALSE	Hispanic or Latino	QUIT	73	Male	TRUE	FALSE	TRUE	TRUE	FALSE	M	1	non-black
680	OUTPATIENT	High	Final result	2.29	4510-03-09	4510-03-09	Yes	CREATININE	2.29	1.03285	4510-02-06	3	4510-02-04	4510-03-14	0	39	4510-02-06	2	3	3	12	12	TRUE	125	73	0.3	NA	1.69	1	1	1	1	0	1	NA	-2	FALSE	Hispanic or Latino	QUIT	73	Male	TRUE	FALSE	TRUE	TRUE	FALSE	M	1	non-black
681	OUTPATIENT	High	Final result	2.23	4510-03-10	4510-03-10	Yes	CREATININE	2.23	1.03285	4510-02-06	3	4510-02-04	4510-03-14	0	39	4510-02-06	2	3	3	12	12	TRUE	125	73	0.3	NA	1.69	1	1	1	1	0	1	NA	-2	FALSE	Hispanic or Latino	QUIT	73	Male	TRUE	FALSE	TRUE	TRUE	FALSE	M	1	non-black
682	OUTPATIENT	High	Final result	3.31	4510-02-22	4510-02-22	Yes	CREATININE	3.31	1.03285	4510-02-06	3	4510-02-04	4510-03-14	0	39	4510-02-06	2	3	3	12	12	TRUE	125	73	0.3	NA	1.69	1	1	1	1	0	1	NA	-2	FALSE	Hispanic or Latino	QUIT	73	Male	TRUE	FALSE	TRUE	TRUE	FALSE	M	1	non-black
683	OUTPATIENT	High	Final result	2.92	4510-03-05	4510-03-05	Yes	CREATININE	2.92	1.03285	4510-02-06	3	4510-02-04	4510-03-14	0	39	4510-02-06	2	3	3	12	12	TRUE	125	73	0.3	NA	1.69	1	1	1	1	0	1	NA	-2	FALSE	Hispanic or Latino	QUIT	73	Male	TRUE	FALSE	TRUE	TRUE	FALSE	M	1	non-black
684	OUTPATIENT	High	Final result	2.62	4510-03-04	4510-03-04	Yes	CREATININE	2.62	1.03285	4510-02-06	3	4510-02-04	4510-03-14	0	39	4510-02-06	2	3	3	12	12	TRUE	125	73	0.3	NA	1.69	1	1	1	1	0	1	NA	-2	FALSE	Hispanic or Latino	QUIT	73	Male	TRUE	FALSE	TRUE	TRUE	FALSE	M	1	non-black
685	OUTPATIENT	High	Final result	1.69	4510-02-06	4510-02-06	Yes	CREATININE	1.69	1.03285	4510-02-06	3	4510-02-04	4510-03-14	0	39	4510-02-06	2	3	3	12	12	TRUE	125	73	0.3	NA	1.69	1	1	1	1	0	1	NA	-2	FALSE	Hispanic or Latino	QUIT	73	Male	TRUE	FALSE	TRUE	TRUE	FALSE	M	1	non-black
686	OUTPATIENT	High	Final result	3.57	4510-02-27	4510-02-27	Yes	CREATININE	3.57	1.03285	4510-02-06	3	4510-02-04	4510-03-14	0	39	4510-02-06	2	3	3	12	12	TRUE	125	73	0.3	NA	1.69	1	1	1	1	0	1	NA	-2	FALSE	Hispanic or Latino	QUIT	73	Male	TRUE	FALSE	TRUE	TRUE	FALSE	M	1	non-black
687	OUTPATIENT	High	Final result	3.21	4510-02-21	4510-02-21	Yes	CREATININE	3.21	1.03285	4510-02-06	3	4510-02-04	4510-03-14	0	39	4510-02-06	2	3	3	12	12	TRUE	125	73	0.3	NA	1.69	1	1	1	1	0	1	NA	-2	FALSE	Hispanic or Latino	QUIT	73	Male	TRUE	FALSE	TRUE	TRUE	FALSE	M	1	non-black
688	OUTPATIENT	High	Final result	1.86	4510-02-10	4510-02-10	Yes	CREATININE	1.86	1.03285	4510-02-06	3	4510-02-04	4510-03-14	0	39	4510-02-06	2	3	3	12	12	TRUE	125	73	0.3	NA	1.69	1	1	1	1	0	1	NA	-2	FALSE	Hispanic or Latino	QUIT	73	Male	TRUE	FALSE	TRUE	TRUE	FALSE	M	1	non-black
689	OUTPATIENT	High	Final result	1.7	4510-02-07	4510-02-07	Yes	CREATININE	1.7	1.03285	4510-02-06	3	4510-02-04	4510-03-14	0	39	4510-02-06	2	3	3	12	12	TRUE	125	73	0.3	NA	1.69	1	1	1	1	0	1	NA	-2	FALSE	Hispanic or Latino	QUIT	73	Male	TRUE	FALSE	TRUE	TRUE	FALSE	M	1	non-black
690	OUTPATIENT	High	Final result	2.74	4510-03-01	4510-03-01	Yes	CREATININE	2.74	1.03285	4510-02-06	3	4510-02-04	4510-03-14	0	39	4510-02-06	2	3	3	12	12	TRUE	125	73	0.3	NA	1.69	1	1	1	1	0	1	NA	-2	FALSE	Hispanic or Latino	QUIT	73	Male	TRUE	FALSE	TRUE	TRUE	FALSE	M	1	non-black
691	OUTPATIENT	High	Final result	2.14	4510-02-19	4510-02-19	Yes	CREATININE	2.14	1.03285	4510-02-06	3	4510-02-04	4510-03-14	0	39	4510-02-06	2	3	3	12	12	TRUE	125	73	0.3	NA	1.69	1	1	1	1	0	1	NA	-2	FALSE	Hispanic or Latino	QUIT	73	Male	TRUE	FALSE	TRUE	TRUE	FALSE	M	1	non-black
692	OUTPATIENT	High	Final result	2.12	4510-03-12	4510-03-12	Yes	CREATININE	2.12	1.03285	4510-02-06	3	4510-02-04	4510-03-14	0	39	4510-02-06	2	3	3	12	12	TRUE	125	73	0.3	NA	1.69	1	1	1	1	0	1	NA	-2	FALSE	Hispanic or Latino	QUIT	73	Male	TRUE	FALSE	TRUE	TRUE	FALSE	M	1	non-black
693	OUTPATIENT	High	Final result	1.94	4510-02-17	4510-02-17	Yes	CREATININE	1.94	1.03285	4510-02-06	3	4510-02-04	4510-03-14	0	39	4510-02-06	2	3	3	12	12	TRUE	125	73	0.3	NA	1.69	1	1	1	1	0	1	NA	-2	FALSE	Hispanic or Latino	QUIT	73	Male	TRUE	FALSE	TRUE	TRUE	FALSE	M	1	non-black
694	OUTPATIENT	High	Final result	1.62	4510-02-26	4510-02-26	Yes	CREATININE	1.62	1.03285	4510-02-06	3	4510-02-04	4510-03-14	0	39	4510-02-06	2	3	3	12	12	TRUE	125	73	0.3	NA	1.69	1	1	1	1	0	1	NA	-2	FALSE	Hispanic or Latino	QUIT	73	Male	TRUE	FALSE	TRUE	TRUE	FALSE	M	1	non-black
695	OUTPATIENT	High	Final result	4.59	4510-02-28	4510-02-28	Yes	CREATININE	4.59	1.03285	4510-02-06	3	4510-02-04	4510-03-14	0	39	4510-02-06	2	3	3	12	12	TRUE	125	73	0.3	NA	1.69	1	1	1	1	0	1	NA	-2	FALSE	Hispanic or Latino	QUIT	73	Male	TRUE	FALSE	TRUE	TRUE	FALSE	M	1	non-black
696	OUTPATIENT	High	Final result	1.55	4510-02-23	4510-02-23	Yes	CREATININE	1.55	1.03285	4510-02-06	3	4510-02-04	4510-03-14	0	39	4510-02-06	2	3	3	12	12	TRUE	125	73	0.3	NA	1.69	1	1	1	1	0	1	NA	-2	FALSE	Hispanic or Latino	QUIT	73	Male	TRUE	FALSE	TRUE	TRUE	FALSE	M	1	non-black
697	OUTPATIENT	High	Final result	2.52	4510-02-20	4510-02-20	Yes	CREATININE	2.52	1.03285	4510-02-06	3	4510-02-04	4510-03-14	0	39	4510-02-06	2	3	3	12	12	TRUE	125	73	0.3	NA	1.69	1	1	1	1	0	1	NA	-2	FALSE	Hispanic or Latino	QUIT	73	Male	TRUE	FALSE	TRUE	TRUE	FALSE	M	1	non-black
698	OUTPATIENT	High	Final result	2.29	4510-02-12	4510-02-12	Yes	CREATININE	2.29	1.03285	4510-02-06	3	4510-02-04	4510-03-14	0	39	4510-02-06	2	3	3	12	12	TRUE	125	73	0.3	NA	1.69	1	1	1	1	0	1	NA	-2	FALSE	Hispanic or Latino	QUIT	73	Male	TRUE	FALSE	TRUE	TRUE	FALSE	M	1	non-black
699	OUTPATIENT	High	Final result	2.15	4510-02-11	4510-02-11	Yes	CREATININE	2.15	1.03285	4510-02-06	3	4510-02-04	4510-03-14	0	39	4510-02-06	2	3	3	12	12	TRUE	125	73	0.3	NA	1.69	1	1	1	1	0	1	NA	-2	FALSE	Hispanic or Latino	QUIT	73	Male	TRUE	FALSE	TRUE	TRUE	FALSE	M	1	non-black
700	OUTPATIENT	High	Final result	2.82	4510-02-22	4510-02-22	Yes	CREATININE	2.82	1.03285	4510-02-06	3	4510-02-04	4510-03-14	0	39	4510-02-06	2	3	3	12	12	TRUE	125	73	0.3	NA	1.69	1	1	1	1	0	1	NA	-2	FALSE	Hispanic or Latino	QUIT	73	Male	TRUE	FALSE	TRUE	TRUE	FALSE	M	1	non-black
701	OUTPATIENT	High	Final result	3.11	4510-02-21	4510-02-21	Yes	CREATININE	3.11	1.03285	4510-02-06	3	4510-02-04	4510-03-14	0	39	4510-02-06	2	3	3	12	12	TRUE	125	73	0.3	NA	1.69	1	1	1	1	0	1	NA	-2	FALSE	Hispanic or Latino	QUIT	73	Male	TRUE	FALSE	TRUE	TRUE	FALSE	M	1	non-black
702	OUTPATIENT	High	Final result	2.01	4510-02-19	4510-02-19	Yes	CREATININE	2.01	1.03285	4510-02-06	3	4510-02-04	4510-03-14	0	39	4510-02-06	2	3	3	12	12	TRUE	125	73	0.3	NA	1.69	1	1	1	1	0	1	NA	-2	FALSE	Hispanic or Latino	QUIT	73	Male	TRUE	FALSE	TRUE	TRUE	FALSE	M	1	non-black
703	OUTPATIENT	High	Final result	4.01	4510-03-02	4510-03-02	Yes	CREATININE	4.01	1.03285	4510-02-06	3	4510-02-04	4510-03-14	0	39	4510-02-06	2	3	3	12	12	TRUE	125	73	0.3	NA	1.69	1	1	1	1	0	1	NA	-2	FALSE	Hispanic or Latino	QUIT	73	Male	TRUE	FALSE	TRUE	TRUE	FALSE	M	1	non-black
704	OUTPATIENT	High	Final result	2.14	4510-02-15	4510-02-15	Yes	CREATININE	2.14	1.03285	4510-02-06	3	4510-02-04	4510-03-14	0	39	4510-02-06	2	3	3	12	12	TRUE	125	73	0.3	NA	1.69	1	1	1	1	0	1	NA	-2	FALSE	Hispanic or Latino	QUIT	73	Male	TRUE	FALSE	TRUE	TRUE	FALSE	M	1	non-black
705	OUTPATIENT	*Unspecified	Final result	1.18	4510-02-25	4510-02-25	Yes	CREATININE	1.18	1.03285	4510-02-06	3	4510-02-04	4510-03-14	0	39	4510-02-06	2	3	3	12	12	TRUE	125	73	0.3	NA	1.69	1	1	1	1	0	1	NA	-2	FALSE	Hispanic or Latino	QUIT	73	Male	TRUE	FALSE	TRUE	TRUE	FALSE	M	1	non-black
706	OUTPATIENT	*Unspecified	Final result	1.12	4510-02-23	4510-02-23	Yes	CREATININE	1.12	1.03285	4510-02-06	3	4510-02-04	4510-03-14	0	39	4510-02-06	2	3	3	12	12	TRUE	125	73	0.3	NA	1.69	1	1	1	1	0	1	NA	-2	FALSE	Hispanic or Latino	QUIT	73	Male	TRUE	FALSE	TRUE	TRUE	FALSE	M	1	non-black
707	OUTPATIENT	High	Final result	1.87	4510-02-10	4510-02-10	Yes	CREATININE	1.87	1.03285	4510-02-06	3	4510-02-04	4510-03-14	0	39	4510-02-06	2	3	3	12	12	TRUE	125	73	0.3	NA	1.69	1	1	1	1	0	1	NA	-2	FALSE	Hispanic or Latino	QUIT	73	Male	TRUE	FALSE	TRUE	TRUE	FALSE	M	1	non-black
708	OUTPATIENT	High	Final result	1.81	4510-02-09	4510-02-09	Yes	CREATININE	1.81	1.03285	4510-02-06	3	4510-02-04	4510-03-14	0	39	4510-02-06	2	3	3	12	12	TRUE	125	73	0.3	NA	1.69	1	1	1	1	0	1	NA	-2	FALSE	Hispanic or Latino	QUIT	73	Male	TRUE	FALSE	TRUE	TRUE	FALSE	M	1	non-black
709	OUTPATIENT	High	Final result	1.99	4510-02-18	4510-02-18	Yes	CREATININE	1.99	1.03285	4510-02-06	3	4510-02-04	4510-03-14	0	39	4510-02-06	2	3	3	12	12	TRUE	125	73	0.3	NA	1.69	1	1	1	1	0	1	NA	-2	FALSE	Hispanic or Latino	QUIT	73	Male	TRUE	FALSE	TRUE	TRUE	FALSE	M	1	non-black
710	OUTPATIENT	High	Final result	1.86	4510-02-10	4510-02-10	Yes	CREATININE	1.86	1.03285	4510-02-06	3	4510-02-04	4510-03-14	0	39	4510-02-06	2	3	3	12	12	TRUE	125	73	0.3	NA	1.69	1	1	1	1	0	1	NA	-2	FALSE	Hispanic or Latino	QUIT	73	Male	TRUE	FALSE	TRUE	TRUE	FALSE	M	1	non-black
711	OUTPATIENT	High	Final result	2.47	4510-02-13	4510-02-13	Yes	CREATININE	2.47	1.03285	4510-02-06	3	4510-02-04	4510-03-14	0	39	4510-02-06	2	3	3	12	12	TRUE	125	73	0.3	NA	1.69	1	1	1	1	0	1	NA	-2	FALSE	Hispanic or Latino	QUIT	73	Male	TRUE	FALSE	TRUE	TRUE	FALSE	M	1	non-black
712	OUTPATIENT	High	Final result	1.96	4510-03-08	4510-03-08	Yes	CREATININE	1.96	1.03285	4510-02-06	3	4510-02-04	4510-03-14	0	39	4510-02-06	2	3	3	12	12	TRUE	125	73	0.3	NA	1.69	1	1	1	1	0	1	NA	-2	FALSE	Hispanic or Latino	QUIT	73	Male	TRUE	FALSE	TRUE	TRUE	FALSE	M	1	non-black
713	OUTPATIENT	High	Final result	2.71	4510-03-07	4510-03-07	Yes	CREATININE	2.71	1.03285	4510-02-06	3	4510-02-04	4510-03-14	0	39	4510-02-06	2	3	3	12	12	TRUE	125	73	0.3	NA	1.69	1	1	1	1	0	1	NA	-2	FALSE	Hispanic or Latino	QUIT	73	Male	TRUE	FALSE	TRUE	TRUE	FALSE	M	1	non-black
714	OUTPATIENT	High	Final result	1.56	4510-03-13	4510-03-13	Yes	CREATININE	1.56	1.03285	4510-02-06	3	4510-02-04	4510-03-14	0	39	4510-02-06	2	3	3	12	12	TRUE	125	73	0.3	NA	1.69	1	1	1	1	0	1	NA	-2	FALSE	Hispanic or Latino	QUIT	73	Male	TRUE	FALSE	TRUE	TRUE	FALSE	M	1	non-black
715	OUTPATIENT	High	Final result	2.03	4510-03-12	4510-03-12	Yes	CREATININE	2.03	1.03285	4510-02-06	3	4510-02-04	4510-03-14	0	39	4510-02-06	2	3	3	12	12	TRUE	125	73	0.3	NA	1.69	1	1	1	1	0	1	NA	-2	FALSE	Hispanic or Latino	QUIT	73	Male	TRUE	FALSE	TRUE	TRUE	FALSE	M	1	non-black
716	OUTPATIENT	High	Final result	4.39	4510-03-03	4510-03-03	Yes	CREATININE	4.39	1.03285	4510-02-06	3	4510-02-04	4510-03-14	0	39	4510-02-06	2	3	3	12	12	TRUE	125	73	0.3	NA	1.69	1	1	1	1	0	1	NA	-2	FALSE	Hispanic or Latino	QUIT	73	Male	TRUE	FALSE	TRUE	TRUE	FALSE	M	1	non-black
717	OUTPATIENT	High	Final result	1.91	4510-03-11	4510-03-11	Yes	CREATININE	1.91	1.03285	4510-02-06	3	4510-02-04	4510-03-14	0	39	4510-02-06	2	3	3	12	12	TRUE	125	73	0.3	NA	1.69	1	1	1	1	0	1	NA	-2	FALSE	Hispanic or Latino	QUIT	73	Male	TRUE	FALSE	TRUE	TRUE	FALSE	M	1	non-black
718	OUTPATIENT	High	Final result	2.19	4510-03-14	4510-03-14	Yes	CREATININE	2.19	1.03285	4510-02-06	3	4510-02-04	4510-03-14	0	39	4510-02-06	2	3	3	12	12	TRUE	125	73	0.3	NA	1.69	1	1	1	1	0	1	NA	-2	FALSE	Hispanic or Latino	QUIT	73	Male	TRUE	FALSE	TRUE	TRUE	FALSE	M	1	non-black
719	OUTPATIENT	High	Final result	1.89	4510-02-16	4510-02-16	Yes	CREATININE	1.89	1.03285	4510-02-06	3	4510-02-04	4510-03-14	0	39	4510-02-06	2	3	3	12	12	TRUE	125	73	0.3	NA	1.69	1	1	1	1	0	1	NA	-2	FALSE	Hispanic or Latino	QUIT	73	Male	TRUE	FALSE	TRUE	TRUE	FALSE	M	1	non-black
720	OUTPATIENT	High	Final result	2.46	4510-02-14	4510-02-14	Yes	CREATININE	2.46	1.03285	4510-02-06	3	4510-02-04	4510-03-14	0	39	4510-02-06	2	3	3	12	12	TRUE	125	73	0.3	NA	1.69	1	1	1	1	0	1	NA	-2	FALSE	Hispanic or Latino	QUIT	73	Male	TRUE	FALSE	TRUE	TRUE	FALSE	M	1	non-black
721	OUTPATIENT	High	Final result	1.68	4510-04-30	4510-04-30	Yes	CREATININE	1.68	1.03285	4510-02-06	3	4510-02-04	4510-03-14	0	39	4510-02-06	2	3	3	12	12	TRUE	125	73	0.3	NA	1.69	1	1	1	1	0	1	NA	-2	FALSE	Hispanic or Latino	QUIT	73	Male	TRUE	FALSE	TRUE	TRUE	FALSE	M	1	non-black
722	OUTPATIENT	*Unspecified	Final result	1.02	4510-05-01	4510-05-01	Yes	CREATININE	1.02	1.03285	4510-02-06	3	4510-02-04	4510-03-14	0	39	4510-02-06	2	3	3	12	12	TRUE	125	73	0.3	NA	1.69	1	1	1	1	0	1	NA	-2	FALSE	Hispanic or Latino	QUIT	73	Male	TRUE	FALSE	TRUE	TRUE	FALSE	M	1	non-black
723	OUTPATIENT	*Unspecified	Final result	1.1	4510-05-01	4510-05-01	Yes	CREATININE	1.1	1.03285	4510-02-06	3	4510-02-04	4510-03-14	0	39	4510-02-06	2	3	3	12	12	TRUE	125	73	0.3	NA	1.69	1	1	1	1	0	1	NA	-2	FALSE	Hispanic or Latino	QUIT	73	Male	TRUE	FALSE	TRUE	TRUE	FALSE	M	1	non-black
724	OUTPATIENT	High	Final result	2.88	4510-04-30	4510-04-30	Yes	CREATININE	2.88	1.03285	4510-02-06	3	4510-02-04	4510-03-14	0	39	4510-02-06	2	3	3	12	12	TRUE	125	73	0.3	NA	1.69	1	1	1	1	0	1	NA	-2	FALSE	Hispanic or Latino	QUIT	73	Male	TRUE	FALSE	TRUE	TRUE	FALSE	M	1	non-black
725	OUTPATIENT	High	Final result	1.43	4510-05-01	4510-05-01	Yes	CREATININE	1.43	1.03285	4510-02-06	3	4510-02-04	4510-03-14	0	39	4510-02-06	2	3	3	12	12	TRUE	125	73	0.3	NA	1.69	1	1	1	1	0	1	NA	-2	FALSE	Hispanic or Latino	QUIT	73	Male	TRUE	FALSE	TRUE	TRUE	FALSE	M	1	non-black
726	OUTPATIENT	High	Final result	4.12	4510-04-29	4510-04-29	Yes	CREATININE	4.12	1.03285	4510-02-06	3	4510-02-04	4510-03-14	0	39	4510-02-06	2	3	3	12	12	TRUE	125	73	0.3	NA	1.69	1	1	1	1	0	1	NA	-2	FALSE	Hispanic or Latino	QUIT	73	Male	TRUE	FALSE	TRUE	TRUE	FALSE	M	1	non-black
727	OUTPATIENT	High	Final result	4.36	4510-04-29	4510-04-29	Yes	CREATININE	4.36	1.03285	4510-02-06	3	4510-02-04	4510-03-14	0	39	4510-02-06	2	3	3	12	12	TRUE	125	73	0.3	NA	1.69	1	1	1	1	0	1	NA	-2	FALSE	Hispanic or Latino	QUIT	73	Male	TRUE	FALSE	TRUE	TRUE	FALSE	M	1	non-black
728	OUTPATIENT	*Unspecified	Final result	1.3	4510-05-01	4510-05-01	Yes	CREATININE	1.3	1.03285	4510-02-06	3	4510-02-04	4510-03-14	0	39	4510-02-06	2	3	3	12	12	TRUE	125	73	0.3	NA	1.69	1	1	1	1	0	1	NA	-2	FALSE	Hispanic or Latino	QUIT	73	Male	TRUE	FALSE	TRUE	TRUE	FALSE	M	1	non-black
729	OUTPATIENT	High	Final result	2.29	4510-04-30	4510-04-30	Yes	CREATININE	2.29	1.03285	4510-02-06	3	4510-02-04	4510-03-14	0	39	4510-02-06	2	3	3	12	12	TRUE	125	73	0.3	NA	1.69	1	1	1	1	0	1	NA	-2	FALSE	Hispanic or Latino	QUIT	73	Male	TRUE	FALSE	TRUE	TRUE	FALSE	M	1	non-black
730	OUTPATIENT	High	Final result	4.08	4510-04-29	4510-04-29	Yes	CREATININE	4.08	1.03285	4510-02-06	3	4510-02-04	4510-03-14	0	39	4510-02-06	2	3	3	12	12	TRUE	125	73	0.3	NA	1.69	1	1	1	1	0	1	NA	-2	FALSE	Hispanic or Latino	QUIT	73	Male	TRUE	FALSE	TRUE	TRUE	FALSE	M	1	non-black
731	OUTPATIENT	*Unspecified	Final result	0.95	4510-05-01	4510-05-02	Yes	CREATININE	0.95	1.03285	4510-02-06	3	4510-02-04	4510-03-14	0	39	4510-02-06	2	3	3	12	12	TRUE	125	73	0.3	NA	1.69	1	1	1	1	0	1	NA	-2	FALSE	Hispanic or Latino	QUIT	73	Male	TRUE	FALSE	TRUE	TRUE	FALSE	M	1	non-black
732	OUTPATIENT	High	Final result	3.66	4510-04-30	4510-04-30	Yes	CREATININE	3.66	1.03285	4510-02-06	3	4510-02-04	4510-03-14	0	39	4510-02-06	2	3	3	12	12	TRUE	125	73	0.3	NA	1.69	1	1	1	1	0	1	NA	-2	FALSE	Hispanic or Latino	QUIT	73	Male	TRUE	FALSE	TRUE	TRUE	FALSE	M	1	non-black
733	OUTPATIENT	High	Final result	2.03	4510-04-30	4510-04-30	Yes	CREATININE	2.03	1.03285	4510-02-06	3	4510-02-04	4510-03-14	0	39	4510-02-06	2	3	3	12	12	TRUE	125	73	0.3	NA	1.69	1	1	1	1	0	1	NA	-2	FALSE	Hispanic or Latino	QUIT	73	Male	TRUE	FALSE	TRUE	TRUE	FALSE	M	1	non-black
734	OUTPATIENT	*Unspecified	Final result	0.54	4510-06-06	4510-06-06	Yes	CREATININE	0.54	0.886529	4510-02-06	0	NA	NA	Inf	10	4510-02-06	2	1	0	3	3	FALSE	414	8	5	NA	0.68	0	0	0	0	0	1	NA	Inf	FALSE	NOT Hispanic or Latino	YES	40	Female	FALSE	FALSE	FALSE	FALSE	FALSE	F	0.742	non-black
735	OUTPATIENT	*Unspecified	Final result	0.94	4510-08-27	4510-08-27	Yes	CREATININE	0.94	0.886529	4510-02-06	0	NA	NA	Inf	10	4510-02-06	2	1	0	3	3	FALSE	414	8	5	NA	0.68	0	0	0	0	0	1	NA	Inf	FALSE	NOT Hispanic or Latino	YES	40	Female	FALSE	FALSE	FALSE	FALSE	FALSE	F	0.742	non-black
736	OUTPATIENT	*Unspecified	Final result	0.67	4510-03-26	4510-03-26	Yes	CREATININE	0.67	0.886529	4510-02-06	0	NA	NA	Inf	10	4510-02-06	2	1	0	3	3	FALSE	414	8	5	NA	0.68	0	0	0	0	0	1	NA	Inf	FALSE	NOT Hispanic or Latino	YES	40	Female	FALSE	FALSE	FALSE	FALSE	FALSE	F	0.742	non-black
737	OUTPATIENT	Low	Final result	0.49	4510-07-02	4510-07-02	Yes	CREATININE	0.49	0.886529	4510-02-06	0	NA	NA	Inf	10	4510-02-06	2	1	0	3	3	FALSE	414	8	5	NA	0.68	0	0	0	0	0	1	NA	Inf	FALSE	NOT Hispanic or Latino	YES	40	Female	FALSE	FALSE	FALSE	FALSE	FALSE	F	0.742	non-black
738	OUTPATIENT	*Unspecified	Final result	0.58	4510-07-02	4510-07-02	Yes	CREATININE	0.58	0.886529	4510-02-06	0	NA	NA	Inf	10	4510-02-06	2	1	0	3	3	FALSE	414	8	5	NA	0.68	0	0	0	0	0	1	NA	Inf	FALSE	NOT Hispanic or Latino	YES	40	Female	FALSE	FALSE	FALSE	FALSE	FALSE	F	0.742	non-black
739	OUTPATIENT	*Unspecified	Final result	0.67	4510-03-03	4510-03-03	Yes	CREATININE	0.67	0.886529	4510-02-06	0	NA	NA	Inf	10	4510-02-06	2	1	0	3	3	FALSE	414	8	5	NA	0.68	0	0	0	0	0	1	NA	Inf	FALSE	NOT Hispanic or Latino	YES	40	Female	FALSE	FALSE	FALSE	FALSE	FALSE	F	0.742	non-black
740	OUTPATIENT	*Unspecified	Final result	1.09	4510-02-27	4510-02-27	Yes	CREATININE	1.09	0.886529	4510-02-06	0	NA	NA	Inf	10	4510-02-06	2	1	0	3	3	FALSE	414	8	5	NA	0.68	0	0	0	0	0	1	NA	Inf	FALSE	NOT Hispanic or Latino	YES	40	Female	FALSE	FALSE	FALSE	FALSE	FALSE	F	0.742	non-black
741	OUTPATIENT	*Unspecified	Final result	1.1	4510-02-27	4510-02-27	Yes	CREATININE	1.1	0.886529	4510-02-06	0	NA	NA	Inf	10	4510-02-06	2	1	0	3	3	FALSE	414	8	5	NA	0.68	0	0	0	0	0	1	NA	Inf	FALSE	NOT Hispanic or Latino	YES	40	Female	FALSE	FALSE	FALSE	FALSE	FALSE	F	0.742	non-black
742	OUTPATIENT	*Unspecified	Final result	0.56	4510-03-17	4510-03-17	Yes	CREATININE	0.56	0.886529	4510-02-06	0	NA	NA	Inf	10	4510-02-06	2	1	0	3	3	FALSE	414	8	5	NA	0.68	0	0	0	0	0	1	NA	Inf	FALSE	NOT Hispanic or Latino	YES	40	Female	FALSE	FALSE	FALSE	FALSE	FALSE	F	0.742	non-black
743	OUTPATIENT	*Unspecified	Final result	0.55	4510-03-14	4510-03-14	Yes	CREATININE	0.55	0.886529	4510-02-06	0	NA	NA	Inf	10	4510-02-06	2	1	0	3	3	FALSE	414	8	5	NA	0.68	0	0	0	0	0	1	NA	Inf	FALSE	NOT Hispanic or Latino	YES	40	Female	FALSE	FALSE	FALSE	FALSE	FALSE	F	0.742	non-black
744	OUTPATIENT	*Unspecified	Final result	0.63	4510-03-15	4510-03-15	Yes	CREATININE	0.63	0.886529	4510-02-06	0	NA	NA	Inf	10	4510-02-06	2	1	0	3	3	FALSE	414	8	5	NA	0.68	0	0	0	0	0	1	NA	Inf	FALSE	NOT Hispanic or Latino	YES	40	Female	FALSE	FALSE	FALSE	FALSE	FALSE	F	0.742	non-black
745	OUTPATIENT	*Unspecified	Final result	0.76	4510-03-01	4510-03-01	Yes	CREATININE	0.76	0.886529	4510-02-06	0	NA	NA	Inf	10	4510-02-06	2	1	0	3	3	FALSE	414	8	5	NA	0.68	0	0	0	0	0	1	NA	Inf	FALSE	NOT Hispanic or Latino	YES	40	Female	FALSE	FALSE	FALSE	FALSE	FALSE	F	0.742	non-black
746	OUTPATIENT	*Unspecified	Final result	0.65	4510-03-20	4510-03-20	Yes	CREATININE	0.65	0.886529	4510-02-06	0	NA	NA	Inf	10	4510-02-06	2	1	0	3	3	FALSE	414	8	5	NA	0.68	0	0	0	0	0	1	NA	Inf	FALSE	NOT Hispanic or Latino	YES	40	Female	FALSE	FALSE	FALSE	FALSE	FALSE	F	0.742	non-black
747	OUTPATIENT	*Unspecified	Final result	0.54	4510-03-08	4510-03-08	Yes	CREATININE	0.54	0.886529	4510-02-06	0	NA	NA	Inf	10	4510-02-06	2	1	0	3	3	FALSE	414	8	5	NA	0.68	0	0	0	0	0	1	NA	Inf	FALSE	NOT Hispanic or Latino	YES	40	Female	FALSE	FALSE	FALSE	FALSE	FALSE	F	0.742	non-black
748	OUTPATIENT	*Unspecified	Final result	0.62	4510-03-06	4510-03-06	Yes	CREATININE	0.62	0.886529	4510-02-06	0	NA	NA	Inf	10	4510-02-06	2	1	0	3	3	FALSE	414	8	5	NA	0.68	0	0	0	0	0	1	NA	Inf	FALSE	NOT Hispanic or Latino	YES	40	Female	FALSE	FALSE	FALSE	FALSE	FALSE	F	0.742	non-black
749	OUTPATIENT	*Unspecified	Final result	0.55	4510-03-18	4510-03-18	Yes	CREATININE	0.55	0.886529	4510-02-06	0	NA	NA	Inf	10	4510-02-06	2	1	0	3	3	FALSE	414	8	5	NA	0.68	0	0	0	0	0	1	NA	Inf	FALSE	NOT Hispanic or Latino	YES	40	Female	FALSE	FALSE	FALSE	FALSE	FALSE	F	0.742	non-black
750	OUTPATIENT	*Unspecified	Final result	0.57	4510-03-19	4510-03-19	Yes	CREATININE	0.57	0.886529	4510-02-06	0	NA	NA	Inf	10	4510-02-06	2	1	0	3	3	FALSE	414	8	5	NA	0.68	0	0	0	0	0	1	NA	Inf	FALSE	NOT Hispanic or Latino	YES	40	Female	FALSE	FALSE	FALSE	FALSE	FALSE	F	0.742	non-black
751	OUTPATIENT	*Unspecified	Final result	0.63	4510-03-04	4510-03-04	Yes	CREATININE	0.63	0.886529	4510-02-06	0	NA	NA	Inf	10	4510-02-06	2	1	0	3	3	FALSE	414	8	5	NA	0.68	0	0	0	0	0	1	NA	Inf	FALSE	NOT Hispanic or Latino	YES	40	Female	FALSE	FALSE	FALSE	FALSE	FALSE	F	0.742	non-black
752	OUTPATIENT	*Unspecified	Final result	0.58	4510-03-13	4510-03-13	Yes	CREATININE	0.58	0.886529	4510-02-06	0	NA	NA	Inf	10	4510-02-06	2	1	0	3	3	FALSE	414	8	5	NA	0.68	0	0	0	0	0	1	NA	Inf	FALSE	NOT Hispanic or Latino	YES	40	Female	FALSE	FALSE	FALSE	FALSE	FALSE	F	0.742	non-black
753	OUTPATIENT	Low	Final result	0.49	4510-03-10	4510-03-10	Yes	CREATININE	0.49	0.886529	4510-02-06	0	NA	NA	Inf	10	4510-02-06	2	1	0	3	3	FALSE	414	8	5	NA	0.68	0	0	0	0	0	1	NA	Inf	FALSE	NOT Hispanic or Latino	YES	40	Female	FALSE	FALSE	FALSE	FALSE	FALSE	F	0.742	non-black
754	OUTPATIENT	*Unspecified	Final result	0.59	4510-03-07	4510-03-07	Yes	CREATININE	0.59	0.886529	4510-02-06	0	NA	NA	Inf	10	4510-02-06	2	1	0	3	3	FALSE	414	8	5	NA	0.68	0	0	0	0	0	1	NA	Inf	FALSE	NOT Hispanic or Latino	YES	40	Female	FALSE	FALSE	FALSE	FALSE	FALSE	F	0.742	non-black
755	OUTPATIENT	*Unspecified	Final result	0.62	4510-03-05	4510-03-05	Yes	CREATININE	0.62	0.886529	4510-02-06	0	NA	NA	Inf	10	4510-02-06	2	1	0	3	3	FALSE	414	8	5	NA	0.68	0	0	0	0	0	1	NA	Inf	FALSE	NOT Hispanic or Latino	YES	40	Female	FALSE	FALSE	FALSE	FALSE	FALSE	F	0.742	non-black
756	OUTPATIENT	*Unspecified	Final result	0.54	4510-03-16	4510-03-16	Yes	CREATININE	0.54	0.886529	4510-02-06	0	NA	NA	Inf	10	4510-02-06	2	1	0	3	3	FALSE	414	8	5	NA	0.68	0	0	0	0	0	1	NA	Inf	FALSE	NOT Hispanic or Latino	YES	40	Female	FALSE	FALSE	FALSE	FALSE	FALSE	F	0.742	non-black
757	OUTPATIENT	*Unspecified	Final result	0.69	4510-03-02	4510-03-02	Yes	CREATININE	0.69	0.886529	4510-02-06	0	NA	NA	Inf	10	4510-02-06	2	1	0	3	3	FALSE	414	8	5	NA	0.68	0	0	0	0	0	1	NA	Inf	FALSE	NOT Hispanic or Latino	YES	40	Female	FALSE	FALSE	FALSE	FALSE	FALSE	F	0.742	non-black
758	OUTPATIENT	*Unspecified	Final result	0.54	4510-03-12	4510-03-12	Yes	CREATININE	0.54	0.886529	4510-02-06	0	NA	NA	Inf	10	4510-02-06	2	1	0	3	3	FALSE	414	8	5	NA	0.68	0	0	0	0	0	1	NA	Inf	FALSE	NOT Hispanic or Latino	YES	40	Female	FALSE	FALSE	FALSE	FALSE	FALSE	F	0.742	non-black
759	OUTPATIENT	*Unspecified	Final result	0.59	4510-03-05	4510-03-05	Yes	CREATININE	0.59	0.886529	4510-02-06	0	NA	NA	Inf	10	4510-02-06	2	1	0	3	3	FALSE	414	8	5	NA	0.68	0	0	0	0	0	1	NA	Inf	FALSE	NOT Hispanic or Latino	YES	40	Female	FALSE	FALSE	FALSE	FALSE	FALSE	F	0.742	non-black
760	OUTPATIENT	*Unspecified	Final result	0.57	4510-03-07	4510-03-07	Yes	CREATININE	0.57	0.886529	4510-02-06	0	NA	NA	Inf	10	4510-02-06	2	1	0	3	3	FALSE	414	8	5	NA	0.68	0	0	0	0	0	1	NA	Inf	FALSE	NOT Hispanic or Latino	YES	40	Female	FALSE	FALSE	FALSE	FALSE	FALSE	F	0.742	non-black
761	OUTPATIENT	*Unspecified	Final result	0.99	4510-02-28	4510-02-28	Yes	CREATININE	0.99	0.886529	4510-02-06	0	NA	NA	Inf	10	4510-02-06	2	1	0	3	3	FALSE	414	8	5	NA	0.68	0	0	0	0	0	1	NA	Inf	FALSE	NOT Hispanic or Latino	YES	40	Female	FALSE	FALSE	FALSE	FALSE	FALSE	F	0.742	non-black
762	OUTPATIENT	*Unspecified	Final result	0.55	4510-03-06	4510-03-06	Yes	CREATININE	0.55	0.886529	4510-02-06	0	NA	NA	Inf	10	4510-02-06	2	1	0	3	3	FALSE	414	8	5	NA	0.68	0	0	0	0	0	1	NA	Inf	FALSE	NOT Hispanic or Latino	YES	40	Female	FALSE	FALSE	FALSE	FALSE	FALSE	F	0.742	non-black
763	OUTPATIENT	*Unspecified	Final result	0.53	4510-03-11	4510-03-11	Yes	CREATININE	0.53	0.886529	4510-02-06	0	NA	NA	Inf	10	4510-02-06	2	1	0	3	3	FALSE	414	8	5	NA	0.68	0	0	0	0	0	1	NA	Inf	FALSE	NOT Hispanic or Latino	YES	40	Female	FALSE	FALSE	FALSE	FALSE	FALSE	F	0.742	non-black
764	OUTPATIENT	*Unspecified	Final result	0.59	4510-03-21	4510-03-21	Yes	CREATININE	0.59	0.886529	4510-02-06	0	NA	NA	Inf	10	4510-02-06	2	1	0	3	3	FALSE	414	8	5	NA	0.68	0	0	0	0	0	1	NA	Inf	FALSE	NOT Hispanic or Latino	YES	40	Female	FALSE	FALSE	FALSE	FALSE	FALSE	F	0.742	non-black
765	OUTPATIENT	*Unspecified	Final result	0.53	4510-03-09	4510-03-09	Yes	CREATININE	0.53	0.886529	4510-02-06	0	NA	NA	Inf	10	4510-02-06	2	1	0	3	3	FALSE	414	8	5	NA	0.68	0	0	0	0	0	1	NA	Inf	FALSE	NOT Hispanic or Latino	YES	40	Female	FALSE	FALSE	FALSE	FALSE	FALSE	F	0.742	non-black
766	OUTPATIENT	*Unspecified	Final result	0.53	4510-06-05	4510-06-05	Yes	CREATININE	0.53	0.886529	4510-02-06	0	NA	NA	Inf	10	4510-02-06	2	1	0	3	3	FALSE	414	8	5	NA	0.68	0	0	0	0	0	1	NA	Inf	FALSE	NOT Hispanic or Latino	YES	40	Female	FALSE	FALSE	FALSE	FALSE	FALSE	F	0.742	non-black
767	OUTPATIENT	*Unspecified	Final result	0.54	4510-06-04	4510-06-04	Yes	CREATININE	0.54	0.886529	4510-02-06	0	NA	NA	Inf	10	4510-02-06	2	1	0	3	3	FALSE	414	8	5	NA	0.68	0	0	0	0	0	1	NA	Inf	FALSE	NOT Hispanic or Latino	YES	40	Female	FALSE	FALSE	FALSE	FALSE	FALSE	F	0.742	non-black
768	OUTPATIENT	High	Final result	3.74	4511-07-13	4511-07-13	Yes	CREATININE	3.74	0.886529	4510-02-06	0	NA	NA	Inf	10	4510-02-06	2	1	0	3	3	FALSE	414	8	5	NA	0.68	0	0	0	0	0	1	NA	Inf	FALSE	NOT Hispanic or Latino	YES	40	Female	FALSE	FALSE	FALSE	FALSE	FALSE	F	0.742	non-black
769	OUTPATIENT	*Unspecified	Final result	0.61	4510-04-16	4510-04-16	Yes	CREATININE	0.61	0.886529	4510-02-06	0	NA	NA	Inf	10	4510-02-06	2	1	0	3	3	FALSE	414	8	5	NA	0.68	0	0	0	0	0	1	NA	Inf	FALSE	NOT Hispanic or Latino	YES	40	Female	FALSE	FALSE	FALSE	FALSE	FALSE	F	0.742	non-black
770	OUTPATIENT	*Unspecified	Final result	0.69	4510-10-01	4510-10-01	Yes	CREATININE	0.69	0.886529	4510-02-06	0	NA	NA	Inf	10	4510-02-06	2	1	0	3	3	FALSE	414	8	5	NA	0.68	0	0	0	0	0	1	NA	Inf	FALSE	NOT Hispanic or Latino	YES	40	Female	FALSE	FALSE	FALSE	FALSE	FALSE	F	0.742	non-black
771	OUTPATIENT	*Unspecified	Final result	0.71	4510-02-09	4510-02-09	Yes	CREATININE	0.71	0.886529	4510-02-06	0	NA	NA	Inf	10	4510-02-06	2	1	0	3	3	FALSE	414	8	5	NA	0.68	0	0	0	0	0	1	NA	Inf	FALSE	NOT Hispanic or Latino	YES	40	Female	FALSE	FALSE	FALSE	FALSE	FALSE	F	0.742	non-black
772	OUTPATIENT	*Unspecified	Final result	0.54	4511-02-19	4511-02-19	Yes	CREATININE	0.54	0.886529	4510-02-06	0	NA	NA	Inf	10	4510-02-06	2	1	0	3	3	FALSE	414	8	5	NA	0.68	0	0	0	0	0	1	NA	Inf	FALSE	NOT Hispanic or Latino	YES	40	Female	FALSE	FALSE	FALSE	FALSE	FALSE	F	0.742	non-black
773	OUTPATIENT	*Unspecified	Final result	0.5	4510-04-13	4510-04-13	Yes	CREATININE	0.5	0.886529	4510-02-06	0	NA	NA	Inf	10	4510-02-06	2	1	0	3	3	FALSE	414	8	5	NA	0.68	0	0	0	0	0	1	NA	Inf	FALSE	NOT Hispanic or Latino	YES	40	Female	FALSE	FALSE	FALSE	FALSE	FALSE	F	0.742	non-black
774	OUTPATIENT	*Unspecified	Final result	0.54	4510-04-15	4510-04-16	Yes	CREATININE	0.54	0.886529	4510-02-06	0	NA	NA	Inf	10	4510-02-06	2	1	0	3	3	FALSE	414	8	5	NA	0.68	0	0	0	0	0	1	NA	Inf	FALSE	NOT Hispanic or Latino	YES	40	Female	FALSE	FALSE	FALSE	FALSE	FALSE	F	0.742	non-black
775	OUTPATIENT	*Unspecified	Final result	0.56	4510-04-14	4510-04-14	Yes	CREATININE	0.56	0.886529	4510-02-06	0	NA	NA	Inf	10	4510-02-06	2	1	0	3	3	FALSE	414	8	5	NA	0.68	0	0	0	0	0	1	NA	Inf	FALSE	NOT Hispanic or Latino	YES	40	Female	FALSE	FALSE	FALSE	FALSE	FALSE	F	0.742	non-black
776	OUTPATIENT	*Unspecified	Final result	0.56	4510-04-13	4510-04-13	Yes	CREATININE	0.56	0.886529	4510-02-06	0	NA	NA	Inf	10	4510-02-06	2	1	0	3	3	FALSE	414	8	5	NA	0.68	0	0	0	0	0	1	NA	Inf	FALSE	NOT Hispanic or Latino	YES	40	Female	FALSE	FALSE	FALSE	FALSE	FALSE	F	0.742	non-black
777	OUTPATIENT	*Unspecified	Final result	0.59	4510-04-17	4510-04-17	Yes	CREATININE	0.59	0.886529	4510-02-06	0	NA	NA	Inf	10	4510-02-06	2	1	0	3	3	FALSE	414	8	5	NA	0.68	0	0	0	0	0	1	NA	Inf	FALSE	NOT Hispanic or Latino	YES	40	Female	FALSE	FALSE	FALSE	FALSE	FALSE	F	0.742	non-black
778	OUTPATIENT	*Unspecified	Final result	0.63	4510-11-17	4510-11-17	Yes	CREATININE	0.63	0.886529	4510-02-06	0	NA	NA	Inf	10	4510-02-06	2	1	0	3	3	FALSE	414	8	5	NA	0.68	0	0	0	0	0	1	NA	Inf	FALSE	NOT Hispanic or Latino	YES	40	Female	FALSE	FALSE	FALSE	FALSE	FALSE	F	0.742	non-black
779	OUTPATIENT	Low	Final result	0.46	4510-11-18	4510-11-18	Yes	CREATININE	0.46	0.886529	4510-02-06	0	NA	NA	Inf	10	4510-02-06	2	1	0	3	3	FALSE	414	8	5	NA	0.68	0	0	0	0	0	1	NA	Inf	FALSE	NOT Hispanic or Latino	YES	40	Female	FALSE	FALSE	FALSE	FALSE	FALSE	F	0.742	non-black
780	OUTPATIENT	Low	Final result	0.49	4511-02-19	4511-02-19	Yes	CREATININE	0.49	0.886529	4510-02-06	0	NA	NA	Inf	10	4510-02-06	2	1	0	3	3	FALSE	414	8	5	NA	0.68	0	0	0	0	0	1	NA	Inf	FALSE	NOT Hispanic or Latino	YES	40	Female	FALSE	FALSE	FALSE	FALSE	FALSE	F	0.742	non-black
781	OUTPATIENT	High	Final result	2.56	4511-07-19	4511-07-19	Yes	CREATININE	2.56	0.886529	4510-02-06	0	NA	NA	Inf	10	4510-02-06	2	1	0	3	3	FALSE	414	8	5	NA	0.68	0	0	0	0	0	1	NA	Inf	FALSE	NOT Hispanic or Latino	YES	40	Female	FALSE	FALSE	FALSE	FALSE	FALSE	F	0.742	non-black
782	OUTPATIENT	High	Final result	4.04	4511-07-13	4511-07-13	Yes	CREATININE	4.04	0.886529	4510-02-06	0	NA	NA	Inf	10	4510-02-06	2	1	0	3	3	FALSE	414	8	5	NA	0.68	0	0	0	0	0	1	NA	Inf	FALSE	NOT Hispanic or Latino	YES	40	Female	FALSE	FALSE	FALSE	FALSE	FALSE	F	0.742	non-black
783	OUTPATIENT	High	Final result	3.95	4511-07-06	4511-07-06	Yes	CREATININE	3.95	0.886529	4510-02-06	0	NA	NA	Inf	10	4510-02-06	2	1	0	3	3	FALSE	414	8	5	NA	0.68	0	0	0	0	0	1	NA	Inf	FALSE	NOT Hispanic or Latino	YES	40	Female	FALSE	FALSE	FALSE	FALSE	FALSE	F	0.742	non-black
784	OUTPATIENT	High	Final result	4.05	4511-07-07	4511-07-07	Yes	CREATININE	4.05	0.886529	4510-02-06	0	NA	NA	Inf	10	4510-02-06	2	1	0	3	3	FALSE	414	8	5	NA	0.68	0	0	0	0	0	1	NA	Inf	FALSE	NOT Hispanic or Latino	YES	40	Female	FALSE	FALSE	FALSE	FALSE	FALSE	F	0.742	non-black
785	OUTPATIENT	High	Final result	4.01	4511-07-07	4511-07-07	Yes	CREATININE	4.01	0.886529	4510-02-06	0	NA	NA	Inf	10	4510-02-06	2	1	0	3	3	FALSE	414	8	5	NA	0.68	0	0	0	0	0	1	NA	Inf	FALSE	NOT Hispanic or Latino	YES	40	Female	FALSE	FALSE	FALSE	FALSE	FALSE	F	0.742	non-black
786	OUTPATIENT	High	Final result	4.03	4511-07-08	4511-07-08	Yes	CREATININE	4.03	0.886529	4510-02-06	0	NA	NA	Inf	10	4510-02-06	2	1	0	3	3	FALSE	414	8	5	NA	0.68	0	0	0	0	0	1	NA	Inf	FALSE	NOT Hispanic or Latino	YES	40	Female	FALSE	FALSE	FALSE	FALSE	FALSE	F	0.742	non-black
787	OUTPATIENT	High	Preliminary result	3.8	4511-07-06	4511-07-06	No	CREATININE	3.8	0.886529	4510-02-06	0	NA	NA	Inf	10	4510-02-06	2	1	0	3	3	FALSE	414	8	5	NA	0.68	0	0	0	0	0	1	NA	Inf	FALSE	NOT Hispanic or Latino	YES	40	Female	FALSE	FALSE	FALSE	FALSE	FALSE	F	0.742	non-black
788	OUTPATIENT	High	Final result	4.87	4511-07-11	4511-07-11	Yes	CREATININE	4.87	0.886529	4510-02-06	0	NA	NA	Inf	10	4510-02-06	2	1	0	3	3	FALSE	414	8	5	NA	0.68	0	0	0	0	0	1	NA	Inf	FALSE	NOT Hispanic or Latino	YES	40	Female	FALSE	FALSE	FALSE	FALSE	FALSE	F	0.742	non-black
789	OUTPATIENT	High	Final result	4.78	4511-07-12	4511-07-12	Yes	CREATININE	4.78	0.886529	4510-02-06	0	NA	NA	Inf	10	4510-02-06	2	1	0	3	3	FALSE	414	8	5	NA	0.68	0	0	0	0	0	1	NA	Inf	FALSE	NOT Hispanic or Latino	YES	40	Female	FALSE	FALSE	FALSE	FALSE	FALSE	F	0.742	non-black
790	OUTPATIENT	High	Final result	4.65	4511-07-12	4511-07-12	Yes	CREATININE	4.65	0.886529	4510-02-06	0	NA	NA	Inf	10	4510-02-06	2	1	0	3	3	FALSE	414	8	5	NA	0.68	0	0	0	0	0	1	NA	Inf	FALSE	NOT Hispanic or Latino	YES	40	Female	FALSE	FALSE	FALSE	FALSE	FALSE	F	0.742	non-black
791	OUTPATIENT	High	Final result	4.52	4511-07-12	4511-07-12	Yes	CREATININE	4.52	0.886529	4510-02-06	0	NA	NA	Inf	10	4510-02-06	2	1	0	3	3	FALSE	414	8	5	NA	0.68	0	0	0	0	0	1	NA	Inf	FALSE	NOT Hispanic or Latino	YES	40	Female	FALSE	FALSE	FALSE	FALSE	FALSE	F	0.742	non-black
792	OUTPATIENT	High	Final result	4.49	4511-07-12	4511-07-12	Yes	CREATININE	4.49	0.886529	4510-02-06	0	NA	NA	Inf	10	4510-02-06	2	1	0	3	3	FALSE	414	8	5	NA	0.68	0	0	0	0	0	1	NA	Inf	FALSE	NOT Hispanic or Latino	YES	40	Female	FALSE	FALSE	FALSE	FALSE	FALSE	F	0.742	non-black
793	OUTPATIENT	High	Final result	2.98	4511-07-16	4511-07-16	Yes	CREATININE	2.98	0.886529	4510-02-06	0	NA	NA	Inf	10	4510-02-06	2	1	0	3	3	FALSE	414	8	5	NA	0.68	0	0	0	0	0	1	NA	Inf	FALSE	NOT Hispanic or Latino	YES	40	Female	FALSE	FALSE	FALSE	FALSE	FALSE	F	0.742	non-black
794	OUTPATIENT	High	Final result	3	4511-07-17	4511-07-17	Yes	CREATININE	3	0.886529	4510-02-06	0	NA	NA	Inf	10	4510-02-06	2	1	0	3	3	FALSE	414	8	5	NA	0.68	0	0	0	0	0	1	NA	Inf	FALSE	NOT Hispanic or Latino	YES	40	Female	FALSE	FALSE	FALSE	FALSE	FALSE	F	0.742	non-black
795	OUTPATIENT	High	Final result	2.93	4511-07-18	4511-07-18	Yes	CREATININE	2.93	0.886529	4510-02-06	0	NA	NA	Inf	10	4510-02-06	2	1	0	3	3	FALSE	414	8	5	NA	0.68	0	0	0	0	0	1	NA	Inf	FALSE	NOT Hispanic or Latino	YES	40	Female	FALSE	FALSE	FALSE	FALSE	FALSE	F	0.742	non-black
796	OUTPATIENT	High	Final result	4.77	4511-07-09	4511-07-09	Yes	CREATININE	4.77	0.886529	4510-02-06	0	NA	NA	Inf	10	4510-02-06	2	1	0	3	3	FALSE	414	8	5	NA	0.68	0	0	0	0	0	1	NA	Inf	FALSE	NOT Hispanic or Latino	YES	40	Female	FALSE	FALSE	FALSE	FALSE	FALSE	F	0.742	non-black
797	OUTPATIENT	High	Final result	4.82	4511-07-10	4511-07-10	Yes	CREATININE	4.82	0.886529	4510-02-06	0	NA	NA	Inf	10	4510-02-06	2	1	0	3	3	FALSE	414	8	5	NA	0.68	0	0	0	0	0	1	NA	Inf	FALSE	NOT Hispanic or Latino	YES	40	Female	FALSE	FALSE	FALSE	FALSE	FALSE	F	0.742	non-black
798	OUTPATIENT	High	Final result	4.96	4511-07-10	4511-07-10	Yes	CREATININE	4.96	0.886529	4510-02-06	0	NA	NA	Inf	10	4510-02-06	2	1	0	3	3	FALSE	414	8	5	NA	0.68	0	0	0	0	0	1	NA	Inf	FALSE	NOT Hispanic or Latino	YES	40	Female	FALSE	FALSE	FALSE	FALSE	FALSE	F	0.742	non-black
799	OUTPATIENT	High	Final result	4.18	4511-07-08	4511-07-08	Yes	CREATININE	4.18	0.886529	4510-02-06	0	NA	NA	Inf	10	4510-02-06	2	1	0	3	3	FALSE	414	8	5	NA	0.68	0	0	0	0	0	1	NA	Inf	FALSE	NOT Hispanic or Latino	YES	40	Female	FALSE	FALSE	FALSE	FALSE	FALSE	F	0.742	non-black
800	OUTPATIENT	High	Final result	3.09	4511-07-15	4511-07-15	Yes	CREATININE	3.09	0.886529	4510-02-06	0	NA	NA	Inf	10	4510-02-06	2	1	0	3	3	FALSE	414	8	5	NA	0.68	0	0	0	0	0	1	NA	Inf	FALSE	NOT Hispanic or Latino	YES	40	Female	FALSE	FALSE	FALSE	FALSE	FALSE	F	0.742	non-black
801	OUTPATIENT	High	Final result	3.2	4511-07-14	4511-07-14	Yes	CREATININE	3.2	0.886529	4510-02-06	0	NA	NA	Inf	10	4510-02-06	2	1	0	3	3	FALSE	414	8	5	NA	0.68	0	0	0	0	0	1	NA	Inf	FALSE	NOT Hispanic or Latino	YES	40	Female	FALSE	FALSE	FALSE	FALSE	FALSE	F	0.742	non-black
802	OUTPATIENT	*Unspecified	Final result	0.8	4510-02-11	4510-02-11	Yes	CREATININE	0.8	0.886529	4510-02-06	0	NA	NA	Inf	10	4510-02-06	2	1	0	3	3	FALSE	414	8	5	NA	0.68	0	0	0	0	0	1	NA	Inf	FALSE	NOT Hispanic or Latino	YES	40	Female	FALSE	FALSE	FALSE	FALSE	FALSE	F	0.742	non-black
803	OUTPATIENT	*Unspecified	Final result	0.81	4510-02-10	4510-02-10	Yes	CREATININE	0.81	0.886529	4510-02-06	0	NA	NA	Inf	10	4510-02-06	2	1	0	3	3	FALSE	414	8	5	NA	0.68	0	0	0	0	0	1	NA	Inf	FALSE	NOT Hispanic or Latino	YES	40	Female	FALSE	FALSE	FALSE	FALSE	FALSE	F	0.742	non-black
804	OUTPATIENT	*Unspecified	Final result	0.75	4510-02-12	4510-02-12	Yes	CREATININE	0.75	0.886529	4510-02-06	0	NA	NA	Inf	10	4510-02-06	2	1	0	3	3	FALSE	414	8	5	NA	0.68	0	0	0	0	0	1	NA	Inf	FALSE	NOT Hispanic or Latino	YES	40	Female	FALSE	FALSE	FALSE	FALSE	FALSE	F	0.742	non-black
805	OUTPATIENT	*Unspecified	Final result	0.75	4510-02-13	4510-02-13	Yes	CREATININE	0.75	0.886529	4510-02-06	0	NA	NA	Inf	10	4510-02-06	2	1	0	3	3	FALSE	414	8	5	NA	0.68	0	0	0	0	0	1	NA	Inf	FALSE	NOT Hispanic or Latino	YES	40	Female	FALSE	FALSE	FALSE	FALSE	FALSE	F	0.742	non-black
806	OUTPATIENT	*Unspecified	Final result	0.63	4510-02-07	4510-02-07	Yes	CREATININE	0.63	0.886529	4510-02-06	0	NA	NA	Inf	10	4510-02-06	2	1	0	3	3	FALSE	414	8	5	NA	0.68	0	0	0	0	0	1	NA	Inf	FALSE	NOT Hispanic or Latino	YES	40	Female	FALSE	FALSE	FALSE	FALSE	FALSE	F	0.742	non-black
807	OUTPATIENT	*Unspecified	Final result	0.64	4510-02-08	4510-02-08	Yes	CREATININE	0.64	0.886529	4510-02-06	0	NA	NA	Inf	10	4510-02-06	2	1	0	3	3	FALSE	414	8	5	NA	0.68	0	0	0	0	0	1	NA	Inf	FALSE	NOT Hispanic or Latino	YES	40	Female	FALSE	FALSE	FALSE	FALSE	FALSE	F	0.742	non-black
808	OUTPATIENT	*Unspecified	Final result	0.68	4510-02-06	4510-02-06	Yes	CREATININE	0.68	0.886529	4510-02-06	0	NA	NA	Inf	10	4510-02-06	2	1	0	3	3	FALSE	414	8	5	NA	0.68	0	0	0	0	0	1	NA	Inf	FALSE	NOT Hispanic or Latino	YES	40	Female	FALSE	FALSE	FALSE	FALSE	FALSE	F	0.742	non-black
809	OUTPATIENT	*Unspecified	Final result	1.01	4510-05-22	4510-05-22	Yes	CREATININE	1.01	1.10004	4510-02-21	0	NA	NA	Inf	19	4510-02-21	17	1	1	1	1	FALSE	320	NA	0.8	NA	0.94	0	0	0	0	0	1	NA	Inf	FALSE	NOT Hispanic or Latino	NEVER	30	Female	FALSE	FALSE	FALSE	FALSE	FALSE	F	0.742	non-black
810	OUTPATIENT	*Unspecified	Final result	1	4510-08-14	4510-08-14	Yes	CREATININE	1	1.10004	4510-02-21	0	NA	NA	Inf	19	4510-02-21	17	1	1	1	1	FALSE	320	NA	0.8	NA	0.94	0	0	0	0	0	1	NA	Inf	FALSE	NOT Hispanic or Latino	NEVER	30	Female	FALSE	FALSE	FALSE	FALSE	FALSE	F	0.742	non-black
811	OUTPATIENT	*Unspecified	Final result	0.85	4510-08-15	4510-08-15	Yes	CREATININE	0.85	1.10004	4510-02-21	0	NA	NA	Inf	19	4510-02-21	17	1	1	1	1	FALSE	320	NA	0.8	NA	0.94	0	0	0	0	0	1	NA	Inf	FALSE	NOT Hispanic or Latino	NEVER	30	Female	FALSE	FALSE	FALSE	FALSE	FALSE	F	0.742	non-black
812	OUTPATIENT	*Unspecified	Final result	0.94	4510-02-21	4510-02-21	Yes	CREATININE	0.94	1.10004	4510-02-21	0	NA	NA	Inf	19	4510-02-21	17	1	1	1	1	FALSE	320	NA	0.8	NA	0.94	0	0	0	0	0	1	NA	Inf	FALSE	NOT Hispanic or Latino	NEVER	30	Female	FALSE	FALSE	FALSE	FALSE	FALSE	F	0.742	non-black
813	OUTPATIENT	*Unspecified	Final result	0.89	4510-02-22	4510-02-22	Yes	CREATININE	0.89	1.10004	4510-02-21	0	NA	NA	Inf	19	4510-02-21	17	1	1	1	1	FALSE	320	NA	0.8	NA	0.94	0	0	0	0	0	1	NA	Inf	FALSE	NOT Hispanic or Latino	NEVER	30	Female	FALSE	FALSE	FALSE	FALSE	FALSE	F	0.742	non-black
814	OUTPATIENT	*Unspecified	Final result	1.02	4510-04-17	4510-04-17	Yes	CREATININE	1.02	1.10004	4510-02-21	0	NA	NA	Inf	19	4510-02-21	17	1	1	1	1	FALSE	320	NA	0.8	NA	0.94	0	0	0	0	0	1	NA	Inf	FALSE	NOT Hispanic or Latino	NEVER	30	Female	FALSE	FALSE	FALSE	FALSE	FALSE	F	0.742	non-black
815	OUTPATIENT	*Unspecified	Final result	0.88	4511-05-31	4511-05-31	Yes	CREATININE	0.88	1.10004	4510-02-21	0	NA	NA	Inf	19	4510-02-21	17	1	1	1	1	FALSE	320	NA	0.8	NA	0.94	0	0	0	0	0	1	NA	Inf	FALSE	NOT Hispanic or Latino	NEVER	30	Female	FALSE	FALSE	FALSE	FALSE	FALSE	F	0.742	non-black
816	OUTPATIENT	*Unspecified	Preliminary result	0.96	4510-04-17	4510-04-17	No	CREATININE	0.96	1.10004	4510-02-21	0	NA	NA	Inf	19	4510-02-21	17	1	1	1	1	FALSE	320	NA	0.8	NA	0.94	0	0	0	0	0	1	NA	Inf	FALSE	NOT Hispanic or Latino	NEVER	30	Female	FALSE	FALSE	FALSE	FALSE	FALSE	F	0.742	non-black
817	OUTPATIENT	*Unspecified	Final result	0.9	4510-04-18	4510-04-18	Yes	CREATININE	0.9	1.10004	4510-02-21	0	NA	NA	Inf	19	4510-02-21	17	1	1	1	1	FALSE	320	NA	0.8	NA	0.94	0	0	0	0	0	1	NA	Inf	FALSE	NOT Hispanic or Latino	NEVER	30	Female	FALSE	FALSE	FALSE	FALSE	FALSE	F	0.742	non-black
818	OUTPATIENT	*Unspecified	Final result	0.63	4510-11-12	4510-11-12	Yes	CREATININE	0.63	1.10004	4510-02-21	0	NA	NA	Inf	19	4510-02-21	17	1	1	1	1	FALSE	320	NA	0.8	NA	0.94	0	0	0	0	0	1	NA	Inf	FALSE	NOT Hispanic or Latino	NEVER	30	Female	FALSE	FALSE	FALSE	FALSE	FALSE	F	0.742	non-black
819	OUTPATIENT	*Unspecified	Final result	0.7	4510-11-09	4510-11-09	Yes	CREATININE	0.7	1.10004	4510-02-21	0	NA	NA	Inf	19	4510-02-21	17	1	1	1	1	FALSE	320	NA	0.8	NA	0.94	0	0	0	0	0	1	NA	Inf	FALSE	NOT Hispanic or Latino	NEVER	30	Female	FALSE	FALSE	FALSE	FALSE	FALSE	F	0.742	non-black
820	OUTPATIENT	*Unspecified	Final result	0.92	4510-11-08	4510-11-08	Yes	CREATININE	0.92	1.10004	4510-02-21	0	NA	NA	Inf	19	4510-02-21	17	1	1	1	1	FALSE	320	NA	0.8	NA	0.94	0	0	0	0	0	1	NA	Inf	FALSE	NOT Hispanic or Latino	NEVER	30	Female	FALSE	FALSE	FALSE	FALSE	FALSE	F	0.742	non-black
821	OUTPATIENT	*Unspecified	Final result	0.62	4510-11-13	4510-11-13	Yes	CREATININE	0.62	1.10004	4510-02-21	0	NA	NA	Inf	19	4510-02-21	17	1	1	1	1	FALSE	320	NA	0.8	NA	0.94	0	0	0	0	0	1	NA	Inf	FALSE	NOT Hispanic or Latino	NEVER	30	Female	FALSE	FALSE	FALSE	FALSE	FALSE	F	0.742	non-black
822	OUTPATIENT	*Unspecified	Final result	0.74	4510-11-10	4510-11-10	Yes	CREATININE	0.74	1.10004	4510-02-21	0	NA	NA	Inf	19	4510-02-21	17	1	1	1	1	FALSE	320	NA	0.8	NA	0.94	0	0	0	0	0	1	NA	Inf	FALSE	NOT Hispanic or Latino	NEVER	30	Female	FALSE	FALSE	FALSE	FALSE	FALSE	F	0.742	non-black
823	OUTPATIENT	*Unspecified	Final result	0.68	4510-11-11	4510-11-11	Yes	CREATININE	0.68	1.10004	4510-02-21	0	NA	NA	Inf	19	4510-02-21	17	1	1	1	1	FALSE	320	NA	0.8	NA	0.94	0	0	0	0	0	1	NA	Inf	FALSE	NOT Hispanic or Latino	NEVER	30	Female	FALSE	FALSE	FALSE	FALSE	FALSE	F	0.742	non-black
824	OUTPATIENT	*Unspecified	Final result	0.71	4510-11-14	4510-11-14	Yes	CREATININE	0.71	1.10004	4510-02-21	0	NA	NA	Inf	19	4510-02-21	17	1	1	1	1	FALSE	320	NA	0.8	NA	0.94	0	0	0	0	0	1	NA	Inf	FALSE	NOT Hispanic or Latino	NEVER	30	Female	FALSE	FALSE	FALSE	FALSE	FALSE	F	0.742	non-black
825	OUTPATIENT	*Unspecified	Final result	0.68	4510-11-15	4510-11-15	Yes	CREATININE	0.68	1.10004	4510-02-21	0	NA	NA	Inf	19	4510-02-21	17	1	1	1	1	FALSE	320	NA	0.8	NA	0.94	0	0	0	0	0	1	NA	Inf	FALSE	NOT Hispanic or Latino	NEVER	30	Female	FALSE	FALSE	FALSE	FALSE	FALSE	F	0.742	non-black
826	OUTPATIENT	*Unspecified	Final result	0.62	4510-03-04	4510-03-04	Yes	CREATININE	0.62	1.10004	4510-02-21	0	NA	NA	Inf	19	4510-02-21	17	1	1	1	1	FALSE	320	NA	0.8	NA	0.94	0	0	0	0	0	1	NA	Inf	FALSE	NOT Hispanic or Latino	NEVER	30	Female	FALSE	FALSE	FALSE	FALSE	FALSE	F	0.742	non-black
827	OUTPATIENT	*Unspecified	Final result	0.72	4510-03-03	4510-03-03	Yes	CREATININE	0.72	1.10004	4510-02-21	0	NA	NA	Inf	19	4510-02-21	17	1	1	1	1	FALSE	320	NA	0.8	NA	0.94	0	0	0	0	0	1	NA	Inf	FALSE	NOT Hispanic or Latino	NEVER	30	Female	FALSE	FALSE	FALSE	FALSE	FALSE	F	0.742	non-black
828	OUTPATIENT	*Unspecified	Final result	0.72	4510-03-04	4510-03-04	Yes	CREATININE	0.72	1.10004	4510-02-21	0	NA	NA	Inf	19	4510-02-21	17	1	1	1	1	FALSE	320	NA	0.8	NA	0.94	0	0	0	0	0	1	NA	Inf	FALSE	NOT Hispanic or Latino	NEVER	30	Female	FALSE	FALSE	FALSE	FALSE	FALSE	F	0.742	non-black
829	OUTPATIENT	*Unspecified	Final result	0.73	4510-03-03	4510-03-03	Yes	CREATININE	0.73	1.10004	4510-02-21	0	NA	NA	Inf	19	4510-02-21	17	1	1	1	1	FALSE	320	NA	0.8	NA	0.94	0	0	0	0	0	1	NA	Inf	FALSE	NOT Hispanic or Latino	NEVER	30	Female	FALSE	FALSE	FALSE	FALSE	FALSE	F	0.742	non-black
830	OUTPATIENT	*Unspecified	Final result	0.8	4510-03-01	4510-03-01	Yes	CREATININE	0.8	1.10004	4510-02-21	0	NA	NA	Inf	19	4510-02-21	17	1	1	1	1	FALSE	320	NA	0.8	NA	0.94	0	0	0	0	0	1	NA	Inf	FALSE	NOT Hispanic or Latino	NEVER	30	Female	FALSE	FALSE	FALSE	FALSE	FALSE	F	0.742	non-black
831	OUTPATIENT	*Unspecified	Final result	0.81	4510-02-28	4510-02-28	Yes	CREATININE	0.81	1.10004	4510-02-21	0	NA	NA	Inf	19	4510-02-21	17	1	1	1	1	FALSE	320	NA	0.8	NA	0.94	0	0	0	0	0	1	NA	Inf	FALSE	NOT Hispanic or Latino	NEVER	30	Female	FALSE	FALSE	FALSE	FALSE	FALSE	F	0.742	non-black
832	OUTPATIENT	*Unspecified	Final result	0.81	4510-03-02	4510-03-02	Yes	CREATININE	0.81	1.10004	4510-02-21	0	NA	NA	Inf	19	4510-02-21	17	1	1	1	1	FALSE	320	NA	0.8	NA	0.94	0	0	0	0	0	1	NA	Inf	FALSE	NOT Hispanic or Latino	NEVER	30	Female	FALSE	FALSE	FALSE	FALSE	FALSE	F	0.742	non-black
833	OUTPATIENT	*Unspecified	Final result	0.67	4510-08-04	4510-08-04	Yes	CREATININE	0.67	1.10004	4510-02-21	0	NA	NA	Inf	19	4510-02-21	17	1	1	1	1	FALSE	320	NA	0.8	NA	0.94	0	0	0	0	0	1	NA	Inf	FALSE	NOT Hispanic or Latino	NEVER	30	Female	FALSE	FALSE	FALSE	FALSE	FALSE	F	0.742	non-black
834	OUTPATIENT	*Unspecified	Final result	0.73	4510-08-03	4510-08-03	Yes	CREATININE	0.73	1.10004	4510-02-21	0	NA	NA	Inf	19	4510-02-21	17	1	1	1	1	FALSE	320	NA	0.8	NA	0.94	0	0	0	0	0	1	NA	Inf	FALSE	NOT Hispanic or Latino	NEVER	30	Female	FALSE	FALSE	FALSE	FALSE	FALSE	F	0.742	non-black
835	OUTPATIENT	*Unspecified	Final result	0.91	4510-07-31	4510-07-31	Yes	CREATININE	0.91	1.10004	4510-02-21	0	NA	NA	Inf	19	4510-02-21	17	1	1	1	1	FALSE	320	NA	0.8	NA	0.94	0	0	0	0	0	1	NA	Inf	FALSE	NOT Hispanic or Latino	NEVER	30	Female	FALSE	FALSE	FALSE	FALSE	FALSE	F	0.742	non-black
836	OUTPATIENT	*Unspecified	Final result	0.73	4510-08-05	4510-08-05	Yes	CREATININE	0.73	1.10004	4510-02-21	0	NA	NA	Inf	19	4510-02-21	17	1	1	1	1	FALSE	320	NA	0.8	NA	0.94	0	0	0	0	0	1	NA	Inf	FALSE	NOT Hispanic or Latino	NEVER	30	Female	FALSE	FALSE	FALSE	FALSE	FALSE	F	0.742	non-black
837	OUTPATIENT	*Unspecified	Final result	0.96	4510-08-02	4510-08-02	Yes	CREATININE	0.96	1.10004	4510-02-21	0	NA	NA	Inf	19	4510-02-21	17	1	1	1	1	FALSE	320	NA	0.8	NA	0.94	0	0	0	0	0	1	NA	Inf	FALSE	NOT Hispanic or Latino	NEVER	30	Female	FALSE	FALSE	FALSE	FALSE	FALSE	F	0.742	non-black
838	OUTPATIENT	*Unspecified	Final result	0.92	4510-07-31	4510-07-31	Yes	CREATININE	0.92	1.10004	4510-02-21	0	NA	NA	Inf	19	4510-02-21	17	1	1	1	1	FALSE	320	NA	0.8	NA	0.94	0	0	0	0	0	1	NA	Inf	FALSE	NOT Hispanic or Latino	NEVER	30	Female	FALSE	FALSE	FALSE	FALSE	FALSE	F	0.742	non-black
839	OUTPATIENT	*Unspecified	Final result	0.93	4510-08-01	4510-08-01	Yes	CREATININE	0.93	1.10004	4510-02-21	0	NA	NA	Inf	19	4510-02-21	17	1	1	1	1	FALSE	320	NA	0.8	NA	0.94	0	0	0	0	0	1	NA	Inf	FALSE	NOT Hispanic or Latino	NEVER	30	Female	FALSE	FALSE	FALSE	FALSE	FALSE	F	0.742	non-black
840	OUTPATIENT	High	Final result	9.88	4510-03-13	4510-03-13	Yes	CREATININE	9.88	1.22738	4510-02-07	3	4510-02-05	4510-02-20	0	16	4510-02-07	2	1	1	6	2	FALSE	410	25	1.1	NA	5.61	1	0	1	1	0	1	NA	-2	FALSE	NOT Hispanic or Latino	QUIT	70	Male	FALSE	FALSE	FALSE	FALSE	FALSE	M	1	non-black
841	OUTPATIENT	High	Final result	12.18	4510-03-12	4510-03-12	Yes	CREATININE	12.18	1.22738	4510-02-07	3	4510-02-05	4510-02-20	0	16	4510-02-07	2	1	1	6	2	FALSE	410	25	1.1	NA	5.61	1	0	1	1	0	1	NA	-2	FALSE	NOT Hispanic or Latino	QUIT	70	Male	FALSE	FALSE	FALSE	FALSE	FALSE	M	1	non-black
842	OUTPATIENT	High	Final result	9.11	4510-03-13	4510-03-13	Yes	CREATININE	9.11	1.22738	4510-02-07	3	4510-02-05	4510-02-20	0	16	4510-02-07	2	1	1	6	2	FALSE	410	25	1.1	NA	5.61	1	0	1	1	0	1	NA	-2	FALSE	NOT Hispanic or Latino	QUIT	70	Male	FALSE	FALSE	FALSE	FALSE	FALSE	M	1	non-black
843	OUTPATIENT	High	Final result	10.78	4510-03-14	4510-03-14	Yes	CREATININE	10.78	1.22738	4510-02-07	3	4510-02-05	4510-02-20	0	16	4510-02-07	2	1	1	6	2	FALSE	410	25	1.1	NA	5.61	1	0	1	1	0	1	NA	-2	FALSE	NOT Hispanic or Latino	QUIT	70	Male	FALSE	FALSE	FALSE	FALSE	FALSE	M	1	non-black
844	OUTPATIENT	High	Final result	10.04	4510-03-14	4510-03-14	Yes	CREATININE	10.04	1.22738	4510-02-07	3	4510-02-05	4510-02-20	0	16	4510-02-07	2	1	1	6	2	FALSE	410	25	1.1	NA	5.61	1	0	1	1	0	1	NA	-2	FALSE	NOT Hispanic or Latino	QUIT	70	Male	FALSE	FALSE	FALSE	FALSE	FALSE	M	1	non-black
845	OUTPATIENT	High	Final result	5.61	4510-02-07	4510-02-07	Yes	CREATININE	5.61	1.22738	4510-02-07	3	4510-02-05	4510-02-20	0	16	4510-02-07	2	1	1	6	2	FALSE	410	25	1.1	NA	5.61	1	0	1	1	0	1	NA	-2	FALSE	NOT Hispanic or Latino	QUIT	70	Male	FALSE	FALSE	FALSE	FALSE	FALSE	M	1	non-black
846	OUTPATIENT	High	Final result	8.56	4510-02-11	4510-02-11	Yes	CREATININE	8.56	1.22738	4510-02-07	3	4510-02-05	4510-02-20	0	16	4510-02-07	2	1	1	6	2	FALSE	410	25	1.1	NA	5.61	1	0	1	1	0	1	NA	-2	FALSE	NOT Hispanic or Latino	QUIT	70	Male	FALSE	FALSE	FALSE	FALSE	FALSE	M	1	non-black
847	OUTPATIENT	High	Final result	7.08	4510-02-10	4510-02-10	Yes	CREATININE	7.08	1.22738	4510-02-07	3	4510-02-05	4510-02-20	0	16	4510-02-07	2	1	1	6	2	FALSE	410	25	1.1	NA	5.61	1	0	1	1	0	1	NA	-2	FALSE	NOT Hispanic or Latino	QUIT	70	Male	FALSE	FALSE	FALSE	FALSE	FALSE	M	1	non-black
848	OUTPATIENT	High	Final result	5.29	4510-02-16	4510-02-16	Yes	CREATININE	5.29	1.22738	4510-02-07	3	4510-02-05	4510-02-20	0	16	4510-02-07	2	1	1	6	2	FALSE	410	25	1.1	NA	5.61	1	0	1	1	0	1	NA	-2	FALSE	NOT Hispanic or Latino	QUIT	70	Male	FALSE	FALSE	FALSE	FALSE	FALSE	M	1	non-black
849	OUTPATIENT	High	Final result	7.33	4510-02-15	4510-02-15	Yes	CREATININE	7.33	1.22738	4510-02-07	3	4510-02-05	4510-02-20	0	16	4510-02-07	2	1	1	6	2	FALSE	410	25	1.1	NA	5.61	1	0	1	1	0	1	NA	-2	FALSE	NOT Hispanic or Latino	QUIT	70	Male	FALSE	FALSE	FALSE	FALSE	FALSE	M	1	non-black
850	OUTPATIENT	High	Final result	3.6	4510-02-13	4510-02-13	Yes	CREATININE	3.6	1.22738	4510-02-07	3	4510-02-05	4510-02-20	0	16	4510-02-07	2	1	1	6	2	FALSE	410	25	1.1	NA	5.61	1	0	1	1	0	1	NA	-2	FALSE	NOT Hispanic or Latino	QUIT	70	Male	FALSE	FALSE	FALSE	FALSE	FALSE	M	1	non-black
851	OUTPATIENT	High	Final result	7.1	4510-02-17	4510-02-17	Yes	CREATININE	7.1	1.22738	4510-02-07	3	4510-02-05	4510-02-20	0	16	4510-02-07	2	1	1	6	2	FALSE	410	25	1.1	NA	5.61	1	0	1	1	0	1	NA	-2	FALSE	NOT Hispanic or Latino	QUIT	70	Male	FALSE	FALSE	FALSE	FALSE	FALSE	M	1	non-black
852	OUTPATIENT	High	Final result	9.06	4510-02-18	4510-02-18	Yes	CREATININE	9.06	1.22738	4510-02-07	3	4510-02-05	4510-02-20	0	16	4510-02-07	2	1	1	6	2	FALSE	410	25	1.1	NA	5.61	1	0	1	1	0	1	NA	-2	FALSE	NOT Hispanic or Latino	QUIT	70	Male	FALSE	FALSE	FALSE	FALSE	FALSE	M	1	non-black
853	OUTPATIENT	High	Final result	7.7	4510-02-08	4510-02-08	Yes	CREATININE	7.7	1.22738	4510-02-07	3	4510-02-05	4510-02-20	0	16	4510-02-07	2	1	1	6	2	FALSE	410	25	1.1	NA	5.61	1	0	1	1	0	1	NA	-2	FALSE	NOT Hispanic or Latino	QUIT	70	Male	FALSE	FALSE	FALSE	FALSE	FALSE	M	1	non-black
854	OUTPATIENT	High	Final result	6.72	4510-02-12	4510-02-12	Yes	CREATININE	6.72	1.22738	4510-02-07	3	4510-02-05	4510-02-20	0	16	4510-02-07	2	1	1	6	2	FALSE	410	25	1.1	NA	5.61	1	0	1	1	0	1	NA	-2	FALSE	NOT Hispanic or Latino	QUIT	70	Male	FALSE	FALSE	FALSE	FALSE	FALSE	M	1	non-black
855	OUTPATIENT	High	Final result	5.65	4510-02-14	4510-02-14	Yes	CREATININE	5.65	1.22738	4510-02-07	3	4510-02-05	4510-02-20	0	16	4510-02-07	2	1	1	6	2	FALSE	410	25	1.1	NA	5.61	1	0	1	1	0	1	NA	-2	FALSE	NOT Hispanic or Latino	QUIT	70	Male	FALSE	FALSE	FALSE	FALSE	FALSE	M	1	non-black
856	OUTPATIENT	High	Final result	6.44	4510-02-20	4510-02-20	Yes	CREATININE	6.44	1.22738	4510-02-07	3	4510-02-05	4510-02-20	0	16	4510-02-07	2	1	1	6	2	FALSE	410	25	1.1	NA	5.61	1	0	1	1	0	1	NA	-2	FALSE	NOT Hispanic or Latino	QUIT	70	Male	FALSE	FALSE	FALSE	FALSE	FALSE	M	1	non-black
857	OUTPATIENT	High	Final result	5.11	4510-02-09	4510-02-09	Yes	CREATININE	5.11	1.22738	4510-02-07	3	4510-02-05	4510-02-20	0	16	4510-02-07	2	1	1	6	2	FALSE	410	25	1.1	NA	5.61	1	0	1	1	0	1	NA	-2	FALSE	NOT Hispanic or Latino	QUIT	70	Male	FALSE	FALSE	FALSE	FALSE	FALSE	M	1	non-black
858	OUTPATIENT	*Unspecified	Final result	1	4510-06-05	4510-06-05	Yes	CREATININE	1	1.12905	4510-04-08	0	NA	NA	Inf	7	4510-04-08	3	1	0	2	2	FALSE	100	18	0.4	NA	0.97	0	0	1	0	0	1	NA	Inf	FALSE	NOT Hispanic or Latino	NEVER	44	Male	FALSE	TRUE	FALSE	FALSE	TRUE	M	1	non-black
859	OUTPATIENT	*Unspecified	Final result	1.3	4510-07-21	4510-07-21	Yes	CREATININE	1.3	1.12905	4510-04-08	0	NA	NA	Inf	7	4510-04-08	3	1	0	2	2	FALSE	100	18	0.4	NA	0.97	0	0	1	0	0	1	NA	Inf	FALSE	NOT Hispanic or Latino	NEVER	44	Male	FALSE	TRUE	FALSE	FALSE	TRUE	M	1	non-black
860	OUTPATIENT	*Unspecified	Final result	1.03	4510-04-10	4510-04-10	Yes	CREATININE	1.03	1.12905	4510-04-08	0	NA	NA	Inf	7	4510-04-08	3	1	0	2	2	FALSE	100	18	0.4	NA	0.97	0	0	1	0	0	1	NA	Inf	FALSE	NOT Hispanic or Latino	NEVER	44	Male	FALSE	TRUE	FALSE	FALSE	TRUE	M	1	non-black
861	OUTPATIENT	*Unspecified	Final result	0.97	4510-04-08	4510-04-08	Yes	CREATININE	0.97	1.12905	4510-04-08	0	NA	NA	Inf	7	4510-04-08	3	1	0	2	2	FALSE	100	18	0.4	NA	0.97	0	0	1	0	0	1	NA	Inf	FALSE	NOT Hispanic or Latino	NEVER	44	Male	FALSE	TRUE	FALSE	FALSE	TRUE	M	1	non-black
862	OUTPATIENT	*Unspecified	Final result	1.08	4510-04-11	4510-04-11	Yes	CREATININE	1.08	1.12905	4510-04-08	0	NA	NA	Inf	7	4510-04-08	3	1	0	2	2	FALSE	100	18	0.4	NA	0.97	0	0	1	0	0	1	NA	Inf	FALSE	NOT Hispanic or Latino	NEVER	44	Male	FALSE	TRUE	FALSE	FALSE	TRUE	M	1	non-black
863	OUTPATIENT	*Unspecified	Final result	0.97	4510-04-09	4510-04-09	Yes	CREATININE	0.97	1.12905	4510-04-08	0	NA	NA	Inf	7	4510-04-08	3	1	0	2	2	FALSE	100	18	0.4	NA	0.97	0	0	1	0	0	1	NA	Inf	FALSE	NOT Hispanic or Latino	NEVER	44	Male	FALSE	TRUE	FALSE	FALSE	TRUE	M	1	non-black
864	OUTPATIENT	*Unspecified	Final result	1	4510-05-13	4510-05-13	Yes	CREATININE	1	1.12905	4510-04-08	0	NA	NA	Inf	7	4510-04-08	3	1	0	2	2	FALSE	100	18	0.4	NA	0.97	0	0	1	0	0	1	NA	Inf	FALSE	NOT Hispanic or Latino	NEVER	44	Male	FALSE	TRUE	FALSE	FALSE	TRUE	M	1	non-black
865	OUTPATIENT	*Unspecified	Final result	1	4510-07-15	4510-07-15	Yes	CREATININE	1	1.12905	4510-04-08	0	NA	NA	Inf	7	4510-04-08	3	1	0	2	2	FALSE	100	18	0.4	NA	0.97	0	0	1	0	0	1	NA	Inf	FALSE	NOT Hispanic or Latino	NEVER	44	Male	FALSE	TRUE	FALSE	FALSE	TRUE	M	1	non-black
866	OUTPATIENT	*Unspecified	Final result	1	4510-06-03	4510-06-03	Yes	CREATININE	1	1.12905	4510-04-08	0	NA	NA	Inf	7	4510-04-08	3	1	0	2	2	FALSE	100	18	0.4	NA	0.97	0	0	1	0	0	1	NA	Inf	FALSE	NOT Hispanic or Latino	NEVER	44	Male	FALSE	TRUE	FALSE	FALSE	TRUE	M	1	non-black
867	OUTPATIENT	*Unspecified	Final result	1	4510-06-03	4510-06-03	Yes	CREATININE	1	1.12905	4510-04-08	0	NA	NA	Inf	7	4510-04-08	3	1	0	2	2	FALSE	100	18	0.4	NA	0.97	0	0	1	0	0	1	NA	Inf	FALSE	NOT Hispanic or Latino	NEVER	44	Male	FALSE	TRUE	FALSE	FALSE	TRUE	M	1	non-black
868	OUTPATIENT	*Unspecified	Final result	0.9	4510-06-06	4510-06-06	Yes	CREATININE	0.9	1.12905	4510-04-08	0	NA	NA	Inf	7	4510-04-08	3	1	0	2	2	FALSE	100	18	0.4	NA	0.97	0	0	1	0	0	1	NA	Inf	FALSE	NOT Hispanic or Latino	NEVER	44	Male	FALSE	TRUE	FALSE	FALSE	TRUE	M	1	non-black
869	OUTPATIENT	*Unspecified	Final result	1	4510-06-04	4510-06-05	Yes	CREATININE	1	1.12905	4510-04-08	0	NA	NA	Inf	7	4510-04-08	3	1	0	2	2	FALSE	100	18	0.4	NA	0.97	0	0	1	0	0	1	NA	Inf	FALSE	NOT Hispanic or Latino	NEVER	44	Male	FALSE	TRUE	FALSE	FALSE	TRUE	M	1	non-black
870	OUTPATIENT	*Unspecified	Final result	1.1	4510-09-11	4510-09-11	Yes	CREATININE	1.1	1.12905	4510-04-08	0	NA	NA	Inf	7	4510-04-08	3	1	0	2	2	FALSE	100	18	0.4	NA	0.97	0	0	1	0	0	1	NA	Inf	FALSE	NOT Hispanic or Latino	NEVER	44	Male	FALSE	TRUE	FALSE	FALSE	TRUE	M	1	non-black
871	OUTPATIENT	*Unspecified	Final result	1.2	4510-07-23	4510-07-23	Yes	CREATININE	1.2	1.12905	4510-04-08	0	NA	NA	Inf	7	4510-04-08	3	1	0	2	2	FALSE	100	18	0.4	NA	0.97	0	0	1	0	0	1	NA	Inf	FALSE	NOT Hispanic or Latino	NEVER	44	Male	FALSE	TRUE	FALSE	FALSE	TRUE	M	1	non-black
872	OUTPATIENT	*Unspecified	Final result	1	4510-07-21	4510-07-21	Yes	CREATININE	1	1.12905	4510-04-08	0	NA	NA	Inf	7	4510-04-08	3	1	0	2	2	FALSE	100	18	0.4	NA	0.97	0	0	1	0	0	1	NA	Inf	FALSE	NOT Hispanic or Latino	NEVER	44	Male	FALSE	TRUE	FALSE	FALSE	TRUE	M	1	non-black
873	OUTPATIENT	*Unspecified	Final result	1	4510-09-11	4510-09-11	Yes	CREATININE	1	1.12905	4510-04-08	0	NA	NA	Inf	7	4510-04-08	3	1	0	2	2	FALSE	100	18	0.4	NA	0.97	0	0	1	0	0	1	NA	Inf	FALSE	NOT Hispanic or Latino	NEVER	44	Male	FALSE	TRUE	FALSE	FALSE	TRUE	M	1	non-black
874	OUTPATIENT	*Unspecified	Final result	1.3	4511-01-22	4511-01-22	Yes	CREATININE	1.3	1.12905	4510-04-08	0	NA	NA	Inf	7	4510-04-08	3	1	0	2	2	FALSE	100	18	0.4	NA	0.97	0	0	1	0	0	1	NA	Inf	FALSE	NOT Hispanic or Latino	NEVER	44	Male	FALSE	TRUE	FALSE	FALSE	TRUE	M	1	non-black
875	OUTPATIENT	High	Final result	1.4	4510-10-06	4510-10-06	Yes	CREATININE	1.4	1.12905	4510-04-08	0	NA	NA	Inf	7	4510-04-08	3	1	0	2	2	FALSE	100	18	0.4	NA	0.97	0	0	1	0	0	1	NA	Inf	FALSE	NOT Hispanic or Latino	NEVER	44	Male	FALSE	TRUE	FALSE	FALSE	TRUE	M	1	non-black
876	OUTPATIENT	*Unspecified	Final result	0.9	4510-11-26	4510-11-26	Yes	CREATININE	0.9	1.12905	4510-04-08	0	NA	NA	Inf	7	4510-04-08	3	1	0	2	2	FALSE	100	18	0.4	NA	0.97	0	0	1	0	0	1	NA	Inf	FALSE	NOT Hispanic or Latino	NEVER	44	Male	FALSE	TRUE	FALSE	FALSE	TRUE	M	1	non-black
877	OUTPATIENT	*Unspecified	Final result	0.9	4510-10-29	4510-10-29	Yes	CREATININE	0.9	1.12905	4510-04-08	0	NA	NA	Inf	7	4510-04-08	3	1	0	2	2	FALSE	100	18	0.4	NA	0.97	0	0	1	0	0	1	NA	Inf	FALSE	NOT Hispanic or Latino	NEVER	44	Male	FALSE	TRUE	FALSE	FALSE	TRUE	M	1	non-black
878	OUTPATIENT	*Unspecified	Final result	1	4510-11-26	4510-11-26	Yes	CREATININE	1	1.12905	4510-04-08	0	NA	NA	Inf	7	4510-04-08	3	1	0	2	2	FALSE	100	18	0.4	NA	0.97	0	0	1	0	0	1	NA	Inf	FALSE	NOT Hispanic or Latino	NEVER	44	Male	FALSE	TRUE	FALSE	FALSE	TRUE	M	1	non-black
879	OUTPATIENT	*Unspecified	Final result	0.9	4510-11-27	4510-11-27	Yes	CREATININE	0.9	1.12905	4510-04-08	0	NA	NA	Inf	7	4510-04-08	3	1	0	2	2	FALSE	100	18	0.4	NA	0.97	0	0	1	0	0	1	NA	Inf	FALSE	NOT Hispanic or Latino	NEVER	44	Male	FALSE	TRUE	FALSE	FALSE	TRUE	M	1	non-black
880	OUTPATIENT	*Unspecified	Final result	1.1	4510-10-07	4510-10-07	Yes	CREATININE	1.1	1.12905	4510-04-08	0	NA	NA	Inf	7	4510-04-08	3	1	0	2	2	FALSE	100	18	0.4	NA	0.97	0	0	1	0	0	1	NA	Inf	FALSE	NOT Hispanic or Latino	NEVER	44	Male	FALSE	TRUE	FALSE	FALSE	TRUE	M	1	non-black
881	OUTPATIENT	*Unspecified	Final result	1.2	4510-10-07	4510-10-07	Yes	CREATININE	1.2	1.12905	4510-04-08	0	NA	NA	Inf	7	4510-04-08	3	1	0	2	2	FALSE	100	18	0.4	NA	0.97	0	0	1	0	0	1	NA	Inf	FALSE	NOT Hispanic or Latino	NEVER	44	Male	FALSE	TRUE	FALSE	FALSE	TRUE	M	1	non-black
882	OUTPATIENT	*Unspecified	Final result	1.1	4511-01-22	4511-01-22	Yes	CREATININE	1.1	1.12905	4510-04-08	0	NA	NA	Inf	7	4510-04-08	3	1	0	2	2	FALSE	100	18	0.4	NA	0.97	0	0	1	0	0	1	NA	Inf	FALSE	NOT Hispanic or Latino	NEVER	44	Male	FALSE	TRUE	FALSE	FALSE	TRUE	M	1	non-black
883	OUTPATIENT	*Unspecified	Final result	1	4510-07-17	4510-07-17	Yes	CREATININE	1	1.12905	4510-04-08	0	NA	NA	Inf	7	4510-04-08	3	1	0	2	2	FALSE	100	18	0.4	NA	0.97	0	0	1	0	0	1	NA	Inf	FALSE	NOT Hispanic or Latino	NEVER	44	Male	FALSE	TRUE	FALSE	FALSE	TRUE	M	1	non-black
884	OUTPATIENT	*Unspecified	Final result	1.3	4510-07-15	4510-07-15	Yes	CREATININE	1.3	1.12905	4510-04-08	0	NA	NA	Inf	7	4510-04-08	3	1	0	2	2	FALSE	100	18	0.4	NA	0.97	0	0	1	0	0	1	NA	Inf	FALSE	NOT Hispanic or Latino	NEVER	44	Male	FALSE	TRUE	FALSE	FALSE	TRUE	M	1	non-black
885	OUTPATIENT	*Unspecified	Final result	1.2	4510-07-16	4510-07-16	Yes	CREATININE	1.2	1.12905	4510-04-08	0	NA	NA	Inf	7	4510-04-08	3	1	0	2	2	FALSE	100	18	0.4	NA	0.97	0	0	1	0	0	1	NA	Inf	FALSE	NOT Hispanic or Latino	NEVER	44	Male	FALSE	TRUE	FALSE	FALSE	TRUE	M	1	non-black
886	OUTPATIENT	High	Final result	2.7	4510-03-01	4510-03-01	Yes	CREATININE	2.7	1.05	4510-02-14	0	NA	NA	Inf	9	4510-02-14	8	#NAME?	0	6	4	FALSE	102	73	14	NA	2.19	0	0	0	1	0	1	NA	Inf	FALSE	Hispanic or Latino	YES	60	Female	FALSE	TRUE	FALSE	FALSE	TRUE	F	0.742	non-black
887	OUTPATIENT	High	Final result	2.19	4510-02-14	4510-02-14	Yes	CREATININE	2.19	1.05	4510-02-14	0	NA	NA	Inf	9	4510-02-14	8	#NAME?	0	6	4	FALSE	102	73	14	NA	2.19	0	0	0	1	0	1	NA	Inf	FALSE	Hispanic or Latino	YES	60	Female	FALSE	TRUE	FALSE	FALSE	TRUE	F	0.742	non-black
888	OUTPATIENT	High	Final result	1.4	4510-06-27	4510-06-27	Yes	CREATININE	1.4	1.05	4510-02-14	0	NA	NA	Inf	9	4510-02-14	8	#NAME?	0	6	4	FALSE	102	73	14	NA	2.19	0	0	0	1	0	1	NA	Inf	FALSE	Hispanic or Latino	YES	60	Female	FALSE	TRUE	FALSE	FALSE	TRUE	F	0.742	non-black
889	OUTPATIENT	High	Final result	9.04	4510-03-27	4510-03-27	Yes	CREATININE	9.04	1.05	4510-02-14	0	NA	NA	Inf	9	4510-02-14	8	#NAME?	0	6	4	FALSE	102	73	14	NA	2.19	0	0	0	1	0	1	NA	Inf	FALSE	Hispanic or Latino	YES	60	Female	FALSE	TRUE	FALSE	FALSE	TRUE	F	0.742	non-black
890	OUTPATIENT	High	Final result	1.52	4510-08-15	4510-08-15	Yes	CREATININE	1.52	1.05	4510-02-14	0	NA	NA	Inf	9	4510-02-14	8	#NAME?	0	6	4	FALSE	102	73	14	NA	2.19	0	0	0	1	0	1	NA	Inf	FALSE	Hispanic or Latino	YES	60	Female	FALSE	TRUE	FALSE	FALSE	TRUE	F	0.742	non-black
891	OUTPATIENT	High	Final result	1.68	4510-08-07	4510-08-07	Yes	CREATININE	1.68	1.05	4510-02-14	0	NA	NA	Inf	9	4510-02-14	8	#NAME?	0	6	4	FALSE	102	73	14	NA	2.19	0	0	0	1	0	1	NA	Inf	FALSE	Hispanic or Latino	YES	60	Female	FALSE	TRUE	FALSE	FALSE	TRUE	F	0.742	non-black
892	OUTPATIENT	High	Final result	9.52	4510-03-29	4510-03-29	Yes	CREATININE	9.52	1.05	4510-02-14	0	NA	NA	Inf	9	4510-02-14	8	#NAME?	0	6	4	FALSE	102	73	14	NA	2.19	0	0	0	1	0	1	NA	Inf	FALSE	Hispanic or Latino	YES	60	Female	FALSE	TRUE	FALSE	FALSE	TRUE	F	0.742	non-black
893	OUTPATIENT	High	Final result	8.3	4510-03-31	4510-03-31	Yes	CREATININE	8.3	1.05	4510-02-14	0	NA	NA	Inf	9	4510-02-14	8	#NAME?	0	6	4	FALSE	102	73	14	NA	2.19	0	0	0	1	0	1	NA	Inf	FALSE	Hispanic or Latino	YES	60	Female	FALSE	TRUE	FALSE	FALSE	TRUE	F	0.742	non-black
894	OUTPATIENT	High	Final result	7.91	4510-03-30	4510-03-30	Yes	CREATININE	7.91	1.05	4510-02-14	0	NA	NA	Inf	9	4510-02-14	8	#NAME?	0	6	4	FALSE	102	73	14	NA	2.19	0	0	0	1	0	1	NA	Inf	FALSE	Hispanic or Latino	YES	60	Female	FALSE	TRUE	FALSE	FALSE	TRUE	F	0.742	non-black
895	OUTPATIENT	High	Final result	8.33	4510-03-31	4510-03-31	Yes	CREATININE	8.33	1.05	4510-02-14	0	NA	NA	Inf	9	4510-02-14	8	#NAME?	0	6	4	FALSE	102	73	14	NA	2.19	0	0	0	1	0	1	NA	Inf	FALSE	Hispanic or Latino	YES	60	Female	FALSE	TRUE	FALSE	FALSE	TRUE	F	0.742	non-black
896	OUTPATIENT	High	Final result	8.83	4510-03-27	4510-03-27	Yes	CREATININE	8.83	1.05	4510-02-14	0	NA	NA	Inf	9	4510-02-14	8	#NAME?	0	6	4	FALSE	102	73	14	NA	2.19	0	0	0	1	0	1	NA	Inf	FALSE	Hispanic or Latino	YES	60	Female	FALSE	TRUE	FALSE	FALSE	TRUE	F	0.742	non-black
897	OUTPATIENT	High	Final result	1.33	4510-06-13	4510-06-13	Yes	CREATININE	1.33	1.05	4510-02-14	0	NA	NA	Inf	9	4510-02-14	8	#NAME?	0	6	4	FALSE	102	73	14	NA	2.19	0	0	0	1	0	1	NA	Inf	FALSE	Hispanic or Latino	YES	60	Female	FALSE	TRUE	FALSE	FALSE	TRUE	F	0.742	non-black
898	OUTPATIENT	High	Final result	9.04	4510-03-27	4510-03-27	Yes	CREATININE	9.04	1.05	4510-02-14	0	NA	NA	Inf	9	4510-02-14	8	#NAME?	0	6	4	FALSE	102	73	14	NA	2.19	0	0	0	1	0	1	NA	Inf	FALSE	Hispanic or Latino	YES	60	Female	FALSE	TRUE	FALSE	FALSE	TRUE	F	0.742	non-black
899	OUTPATIENT	High	Final result	9.37	4510-03-29	4510-03-29	Yes	CREATININE	9.37	1.05	4510-02-14	0	NA	NA	Inf	9	4510-02-14	8	#NAME?	0	6	4	FALSE	102	73	14	NA	2.19	0	0	0	1	0	1	NA	Inf	FALSE	Hispanic or Latino	YES	60	Female	FALSE	TRUE	FALSE	FALSE	TRUE	F	0.742	non-black
900	OUTPATIENT	High	Final result	9.45	4510-03-29	4510-03-29	Yes	CREATININE	9.45	1.05	4510-02-14	0	NA	NA	Inf	9	4510-02-14	8	#NAME?	0	6	4	FALSE	102	73	14	NA	2.19	0	0	0	1	0	1	NA	Inf	FALSE	Hispanic or Latino	YES	60	Female	FALSE	TRUE	FALSE	FALSE	TRUE	F	0.742	non-black
901	OUTPATIENT	High	Final result	3	4510-04-01	4510-04-01	Yes	CREATININE	3	1.05	4510-02-14	0	NA	NA	Inf	9	4510-02-14	8	#NAME?	0	6	4	FALSE	102	73	14	NA	2.19	0	0	0	1	0	1	NA	Inf	FALSE	Hispanic or Latino	YES	60	Female	FALSE	TRUE	FALSE	FALSE	TRUE	F	0.742	non-black
902	OUTPATIENT	High	Final result	1.37	4510-06-02	4510-06-02	Yes	CREATININE	1.37	1.05	4510-02-14	0	NA	NA	Inf	9	4510-02-14	8	#NAME?	0	6	4	FALSE	102	73	14	NA	2.19	0	0	0	1	0	1	NA	Inf	FALSE	Hispanic or Latino	YES	60	Female	FALSE	TRUE	FALSE	FALSE	TRUE	F	0.742	non-black
903	OUTPATIENT	High	Final result	1.87	4510-04-17	4510-04-17	Yes	CREATININE	1.87	1.05	4510-02-14	0	NA	NA	Inf	9	4510-02-14	8	#NAME?	0	6	4	FALSE	102	73	14	NA	2.19	0	0	0	1	0	1	NA	Inf	FALSE	Hispanic or Latino	YES	60	Female	FALSE	TRUE	FALSE	FALSE	TRUE	F	0.742	non-black
904	OUTPATIENT	High	Final result	4.91	4510-05-22	4510-05-22	Yes	CREATININE	4.91	1.05	4510-02-14	0	NA	NA	Inf	9	4510-02-14	8	#NAME?	0	6	4	FALSE	102	73	14	NA	2.19	0	0	0	1	0	1	NA	Inf	FALSE	Hispanic or Latino	YES	60	Female	FALSE	TRUE	FALSE	FALSE	TRUE	F	0.742	non-black
905	OUTPATIENT	High	Final result	9.24	4510-03-29	4510-03-29	Yes	CREATININE	9.24	1.05	4510-02-14	0	NA	NA	Inf	9	4510-02-14	8	#NAME?	0	6	4	FALSE	102	73	14	NA	2.19	0	0	0	1	0	1	NA	Inf	FALSE	Hispanic or Latino	YES	60	Female	FALSE	TRUE	FALSE	FALSE	TRUE	F	0.742	non-black
906	OUTPATIENT	High	Final result	8.05	4510-03-31	4510-03-31	Yes	CREATININE	8.05	1.05	4510-02-14	0	NA	NA	Inf	9	4510-02-14	8	#NAME?	0	6	4	FALSE	102	73	14	NA	2.19	0	0	0	1	0	1	NA	Inf	FALSE	Hispanic or Latino	YES	60	Female	FALSE	TRUE	FALSE	FALSE	TRUE	F	0.742	non-black
907	OUTPATIENT	High	Final result	8.24	4510-03-30	4510-03-30	Yes	CREATININE	8.24	1.05	4510-02-14	0	NA	NA	Inf	9	4510-02-14	8	#NAME?	0	6	4	FALSE	102	73	14	NA	2.19	0	0	0	1	0	1	NA	Inf	FALSE	Hispanic or Latino	YES	60	Female	FALSE	TRUE	FALSE	FALSE	TRUE	F	0.742	non-black
908	OUTPATIENT	High	Final result	9.13	4510-03-28	4510-03-28	Yes	CREATININE	9.13	1.05	4510-02-14	0	NA	NA	Inf	9	4510-02-14	8	#NAME?	0	6	4	FALSE	102	73	14	NA	2.19	0	0	0	1	0	1	NA	Inf	FALSE	Hispanic or Latino	YES	60	Female	FALSE	TRUE	FALSE	FALSE	TRUE	F	0.742	non-black
909	OUTPATIENT	High	Final result	1.9	4510-06-09	4510-06-09	Yes	CREATININE	1.9	1.05	4510-02-14	0	NA	NA	Inf	9	4510-02-14	8	#NAME?	0	6	4	FALSE	102	73	14	NA	2.19	0	0	0	1	0	1	NA	Inf	FALSE	Hispanic or Latino	YES	60	Female	FALSE	TRUE	FALSE	FALSE	TRUE	F	0.742	non-black
910	OUTPATIENT	High	Final result	8.37	4510-03-31	4510-03-31	Yes	CREATININE	8.37	1.05	4510-02-14	0	NA	NA	Inf	9	4510-02-14	8	#NAME?	0	6	4	FALSE	102	73	14	NA	2.19	0	0	0	1	0	1	NA	Inf	FALSE	Hispanic or Latino	YES	60	Female	FALSE	TRUE	FALSE	FALSE	TRUE	F	0.742	non-black
911	OUTPATIENT	High	Final result	8.98	4510-03-27	4510-03-27	Yes	CREATININE	8.98	1.05	4510-02-14	0	NA	NA	Inf	9	4510-02-14	8	#NAME?	0	6	4	FALSE	102	73	14	NA	2.19	0	0	0	1	0	1	NA	Inf	FALSE	Hispanic or Latino	YES	60	Female	FALSE	TRUE	FALSE	FALSE	TRUE	F	0.742	non-black
912	OUTPATIENT	High	Final result	9.17	4510-03-28	4510-03-28	Yes	CREATININE	9.17	1.05	4510-02-14	0	NA	NA	Inf	9	4510-02-14	8	#NAME?	0	6	4	FALSE	102	73	14	NA	2.19	0	0	0	1	0	1	NA	Inf	FALSE	Hispanic or Latino	YES	60	Female	FALSE	TRUE	FALSE	FALSE	TRUE	F	0.742	non-black
913	OUTPATIENT	High	Final result	7.99	4510-03-30	4510-03-30	Yes	CREATININE	7.99	1.05	4510-02-14	0	NA	NA	Inf	9	4510-02-14	8	#NAME?	0	6	4	FALSE	102	73	14	NA	2.19	0	0	0	1	0	1	NA	Inf	FALSE	Hispanic or Latino	YES	60	Female	FALSE	TRUE	FALSE	FALSE	TRUE	F	0.742	non-black
914	OUTPATIENT	High	Final result	2.21	4510-05-02	4510-05-02	Yes	CREATININE	2.21	1.05	4510-02-14	0	NA	NA	Inf	9	4510-02-14	8	#NAME?	0	6	4	FALSE	102	73	14	NA	2.19	0	0	0	1	0	1	NA	Inf	FALSE	Hispanic or Latino	YES	60	Female	FALSE	TRUE	FALSE	FALSE	TRUE	F	0.742	non-black
915	OUTPATIENT	High	Final result	6.61	4510-04-02	4510-04-02	Yes	CREATININE	6.61	1.05	4510-02-14	0	NA	NA	Inf	9	4510-02-14	8	#NAME?	0	6	4	FALSE	102	73	14	NA	2.19	0	0	0	1	0	1	NA	Inf	FALSE	Hispanic or Latino	YES	60	Female	FALSE	TRUE	FALSE	FALSE	TRUE	F	0.742	non-black
916	OUTPATIENT	High	Final result	5.23	4510-05-24	4510-05-24	Yes	CREATININE	5.23	1.05	4510-02-14	0	NA	NA	Inf	9	4510-02-14	8	#NAME?	0	6	4	FALSE	102	73	14	NA	2.19	0	0	0	1	0	1	NA	Inf	FALSE	Hispanic or Latino	YES	60	Female	FALSE	TRUE	FALSE	FALSE	TRUE	F	0.742	non-black
917	OUTPATIENT	High	Final result	3.38	4510-05-24	4510-05-24	Yes	CREATININE	3.38	1.05	4510-02-14	0	NA	NA	Inf	9	4510-02-14	8	#NAME?	0	6	4	FALSE	102	73	14	NA	2.19	0	0	0	1	0	1	NA	Inf	FALSE	Hispanic or Latino	YES	60	Female	FALSE	TRUE	FALSE	FALSE	TRUE	F	0.742	non-black
918	OUTPATIENT	High	Final result	9.3	4510-03-28	4510-03-28	Yes	CREATININE	9.3	1.05	4510-02-14	0	NA	NA	Inf	9	4510-02-14	8	#NAME?	0	6	4	FALSE	102	73	14	NA	2.19	0	0	0	1	0	1	NA	Inf	FALSE	Hispanic or Latino	YES	60	Female	FALSE	TRUE	FALSE	FALSE	TRUE	F	0.742	non-black
919	OUTPATIENT	High	Final result	4.52	4510-05-21	4510-05-21	Yes	CREATININE	4.52	1.05	4510-02-14	0	NA	NA	Inf	9	4510-02-14	8	#NAME?	0	6	4	FALSE	102	73	14	NA	2.19	0	0	0	1	0	1	NA	Inf	FALSE	Hispanic or Latino	YES	60	Female	FALSE	TRUE	FALSE	FALSE	TRUE	F	0.742	non-black
920	OUTPATIENT	High	Final result	3.72	4510-05-08	4510-05-08	Yes	CREATININE	3.72	1.05	4510-02-14	0	NA	NA	Inf	9	4510-02-14	8	#NAME?	0	6	4	FALSE	102	73	14	NA	2.19	0	0	0	1	0	1	NA	Inf	FALSE	Hispanic or Latino	YES	60	Female	FALSE	TRUE	FALSE	FALSE	TRUE	F	0.742	non-black
921	OUTPATIENT	High	Final result	4.08	4510-04-27	4510-04-27	Yes	CREATININE	4.08	1.05	4510-02-14	0	NA	NA	Inf	9	4510-02-14	8	#NAME?	0	6	4	FALSE	102	73	14	NA	2.19	0	0	0	1	0	1	NA	Inf	FALSE	Hispanic or Latino	YES	60	Female	FALSE	TRUE	FALSE	FALSE	TRUE	F	0.742	non-black
922	OUTPATIENT	High	Final result	3.09	4510-05-11	4510-05-11	Yes	CREATININE	3.09	1.05	4510-02-14	0	NA	NA	Inf	9	4510-02-14	8	#NAME?	0	6	4	FALSE	102	73	14	NA	2.19	0	0	0	1	0	1	NA	Inf	FALSE	Hispanic or Latino	YES	60	Female	FALSE	TRUE	FALSE	FALSE	TRUE	F	0.742	non-black
923	OUTPATIENT	High	Final result	5	4510-04-09	4510-04-09	Yes	CREATININE	5	1.05	4510-02-14	0	NA	NA	Inf	9	4510-02-14	8	#NAME?	0	6	4	FALSE	102	73	14	NA	2.19	0	0	0	1	0	1	NA	Inf	FALSE	Hispanic or Latino	YES	60	Female	FALSE	TRUE	FALSE	FALSE	TRUE	F	0.742	non-black
924	OUTPATIENT	*Unspecified	Final result	1.09	4510-04-20	4510-04-20	Yes	CREATININE	1.09	1.05	4510-02-14	0	NA	NA	Inf	9	4510-02-14	8	#NAME?	0	6	4	FALSE	102	73	14	NA	2.19	0	0	0	1	0	1	NA	Inf	FALSE	Hispanic or Latino	YES	60	Female	FALSE	TRUE	FALSE	FALSE	TRUE	F	0.742	non-black
925	OUTPATIENT	High	Final result	3.19	4510-04-24	4510-04-24	Yes	CREATININE	3.19	1.05	4510-02-14	0	NA	NA	Inf	9	4510-02-14	8	#NAME?	0	6	4	FALSE	102	73	14	NA	2.19	0	0	0	1	0	1	NA	Inf	FALSE	Hispanic or Latino	YES	60	Female	FALSE	TRUE	FALSE	FALSE	TRUE	F	0.742	non-black
926	OUTPATIENT	High	Final result	2.02	4510-06-17	4510-06-17	Yes	CREATININE	2.02	1.05	4510-02-14	0	NA	NA	Inf	9	4510-02-14	8	#NAME?	0	6	4	FALSE	102	73	14	NA	2.19	0	0	0	1	0	1	NA	Inf	FALSE	Hispanic or Latino	YES	60	Female	FALSE	TRUE	FALSE	FALSE	TRUE	F	0.742	non-black
927	OUTPATIENT	High	Final result	1.58	4510-06-13	4510-06-13	Yes	CREATININE	1.58	1.05	4510-02-14	0	NA	NA	Inf	9	4510-02-14	8	#NAME?	0	6	4	FALSE	102	73	14	NA	2.19	0	0	0	1	0	1	NA	Inf	FALSE	Hispanic or Latino	YES	60	Female	FALSE	TRUE	FALSE	FALSE	TRUE	F	0.742	non-black
928	OUTPATIENT	*Unspecified	Final result	0.74	4510-06-01	4510-06-01	Yes	CREATININE	0.74	1.05	4510-02-14	0	NA	NA	Inf	9	4510-02-14	8	#NAME?	0	6	4	FALSE	102	73	14	NA	2.19	0	0	0	1	0	1	NA	Inf	FALSE	Hispanic or Latino	YES	60	Female	FALSE	TRUE	FALSE	FALSE	TRUE	F	0.742	non-black
929	OUTPATIENT	*Unspecified	Final result	0.7	4510-06-21	4510-06-21	Yes	CREATININE	0.7	1.05	4510-02-14	0	NA	NA	Inf	9	4510-02-14	8	#NAME?	0	6	4	FALSE	102	73	14	NA	2.19	0	0	0	1	0	1	NA	Inf	FALSE	Hispanic or Latino	YES	60	Female	FALSE	TRUE	FALSE	FALSE	TRUE	F	0.742	non-black
930	OUTPATIENT	High	Final result	3.76	4510-04-26	4510-04-26	Yes	CREATININE	3.76	1.05	4510-02-14	0	NA	NA	Inf	9	4510-02-14	8	#NAME?	0	6	4	FALSE	102	73	14	NA	2.19	0	0	0	1	0	1	NA	Inf	FALSE	Hispanic or Latino	YES	60	Female	FALSE	TRUE	FALSE	FALSE	TRUE	F	0.742	non-black
931	OUTPATIENT	High	Final result	1.43	4510-04-22	4510-04-22	Yes	CREATININE	1.43	1.05	4510-02-14	0	NA	NA	Inf	9	4510-02-14	8	#NAME?	0	6	4	FALSE	102	73	14	NA	2.19	0	0	0	1	0	1	NA	Inf	FALSE	Hispanic or Latino	YES	60	Female	FALSE	TRUE	FALSE	FALSE	TRUE	F	0.742	non-black
932	OUTPATIENT	High	Final result	1.8	4510-06-16	4510-06-16	Yes	CREATININE	1.8	1.05	4510-02-14	0	NA	NA	Inf	9	4510-02-14	8	#NAME?	0	6	4	FALSE	102	73	14	NA	2.19	0	0	0	1	0	1	NA	Inf	FALSE	Hispanic or Latino	YES	60	Female	FALSE	TRUE	FALSE	FALSE	TRUE	F	0.742	non-black
933	OUTPATIENT	High	Final result	3.35	4510-04-25	4510-04-25	Yes	CREATININE	3.35	1.05	4510-02-14	0	NA	NA	Inf	9	4510-02-14	8	#NAME?	0	6	4	FALSE	102	73	14	NA	2.19	0	0	0	1	0	1	NA	Inf	FALSE	Hispanic or Latino	YES	60	Female	FALSE	TRUE	FALSE	FALSE	TRUE	F	0.742	non-black
934	OUTPATIENT	High	Final result	3.98	4510-05-13	4510-05-13	Yes	CREATININE	3.98	1.05	4510-02-14	0	NA	NA	Inf	9	4510-02-14	8	#NAME?	0	6	4	FALSE	102	73	14	NA	2.19	0	0	0	1	0	1	NA	Inf	FALSE	Hispanic or Latino	YES	60	Female	FALSE	TRUE	FALSE	FALSE	TRUE	F	0.742	non-black
935	OUTPATIENT	High	Final result	1.68	4510-04-17	4510-04-17	Yes	CREATININE	1.68	1.05	4510-02-14	0	NA	NA	Inf	9	4510-02-14	8	#NAME?	0	6	4	FALSE	102	73	14	NA	2.19	0	0	0	1	0	1	NA	Inf	FALSE	Hispanic or Latino	YES	60	Female	FALSE	TRUE	FALSE	FALSE	TRUE	F	0.742	non-black
936	OUTPATIENT	*Unspecified	Final result	0.92	4510-06-20	4510-06-20	Yes	CREATININE	0.92	1.05	4510-02-14	0	NA	NA	Inf	9	4510-02-14	8	#NAME?	0	6	4	FALSE	102	73	14	NA	2.19	0	0	0	1	0	1	NA	Inf	FALSE	Hispanic or Latino	YES	60	Female	FALSE	TRUE	FALSE	FALSE	TRUE	F	0.742	non-black
937	OUTPATIENT	*Unspecified	Final result	1.07	4510-04-19	4510-04-19	Yes	CREATININE	1.07	1.05	4510-02-14	0	NA	NA	Inf	9	4510-02-14	8	#NAME?	0	6	4	FALSE	102	73	14	NA	2.19	0	0	0	1	0	1	NA	Inf	FALSE	Hispanic or Latino	YES	60	Female	FALSE	TRUE	FALSE	FALSE	TRUE	F	0.742	non-black
938	OUTPATIENT	High	Final result	2.51	4510-05-01	4510-05-01	Yes	CREATININE	2.51	1.05	4510-02-14	0	NA	NA	Inf	9	4510-02-14	8	#NAME?	0	6	4	FALSE	102	73	14	NA	2.19	0	0	0	1	0	1	NA	Inf	FALSE	Hispanic or Latino	YES	60	Female	FALSE	TRUE	FALSE	FALSE	TRUE	F	0.742	non-black
939	OUTPATIENT	High	Final result	9.04	4510-03-28	4510-03-28	Yes	CREATININE	9.04	1.05	4510-02-14	0	NA	NA	Inf	9	4510-02-14	8	#NAME?	0	6	4	FALSE	102	73	14	NA	2.19	0	0	0	1	0	1	NA	Inf	FALSE	Hispanic or Latino	YES	60	Female	FALSE	TRUE	FALSE	FALSE	TRUE	F	0.742	non-black
940	OUTPATIENT	High	Final result	5.86	4510-04-01	4510-04-01	Yes	CREATININE	5.86	1.05	4510-02-14	0	NA	NA	Inf	9	4510-02-14	8	#NAME?	0	6	4	FALSE	102	73	14	NA	2.19	0	0	0	1	0	1	NA	Inf	FALSE	Hispanic or Latino	YES	60	Female	FALSE	TRUE	FALSE	FALSE	TRUE	F	0.742	non-black
941	OUTPATIENT	High	Final result	1.74	4510-05-25	4510-05-26	Yes	CREATININE	1.74	1.05	4510-02-14	0	NA	NA	Inf	9	4510-02-14	8	#NAME?	0	6	4	FALSE	102	73	14	NA	2.19	0	0	0	1	0	1	NA	Inf	FALSE	Hispanic or Latino	YES	60	Female	FALSE	TRUE	FALSE	FALSE	TRUE	F	0.742	non-black
942	OUTPATIENT	High	Final result	3.52	4510-04-15	4510-04-15	Yes	CREATININE	3.52	1.05	4510-02-14	0	NA	NA	Inf	9	4510-02-14	8	#NAME?	0	6	4	FALSE	102	73	14	NA	2.19	0	0	0	1	0	1	NA	Inf	FALSE	Hispanic or Latino	YES	60	Female	FALSE	TRUE	FALSE	FALSE	TRUE	F	0.742	non-black
943	OUTPATIENT	High	Final result	1.86	4510-04-22	4510-04-22	Yes	CREATININE	1.86	1.05	4510-02-14	0	NA	NA	Inf	9	4510-02-14	8	#NAME?	0	6	4	FALSE	102	73	14	NA	2.19	0	0	0	1	0	1	NA	Inf	FALSE	Hispanic or Latino	YES	60	Female	FALSE	TRUE	FALSE	FALSE	TRUE	F	0.742	non-black
944	OUTPATIENT	High	Final result	1.45	4510-07-02	4510-07-02	Yes	CREATININE	1.45	1.05	4510-02-14	0	NA	NA	Inf	9	4510-02-14	8	#NAME?	0	6	4	FALSE	102	73	14	NA	2.19	0	0	0	1	0	1	NA	Inf	FALSE	Hispanic or Latino	YES	60	Female	FALSE	TRUE	FALSE	FALSE	TRUE	F	0.742	non-black
945	OUTPATIENT	High	Final result	5.42	4510-04-04	4510-04-04	Yes	CREATININE	5.42	1.05	4510-02-14	0	NA	NA	Inf	9	4510-02-14	8	#NAME?	0	6	4	FALSE	102	73	14	NA	2.19	0	0	0	1	0	1	NA	Inf	FALSE	Hispanic or Latino	YES	60	Female	FALSE	TRUE	FALSE	FALSE	TRUE	F	0.742	non-black
946	OUTPATIENT	High	Final result	4.04	4510-04-08	4510-04-08	Yes	CREATININE	4.04	1.05	4510-02-14	0	NA	NA	Inf	9	4510-02-14	8	#NAME?	0	6	4	FALSE	102	73	14	NA	2.19	0	0	0	1	0	1	NA	Inf	FALSE	Hispanic or Latino	YES	60	Female	FALSE	TRUE	FALSE	FALSE	TRUE	F	0.742	non-black
947	OUTPATIENT	High	Final result	1.46	4510-06-29	4510-06-29	Yes	CREATININE	1.46	1.05	4510-02-14	0	NA	NA	Inf	9	4510-02-14	8	#NAME?	0	6	4	FALSE	102	73	14	NA	2.19	0	0	0	1	0	1	NA	Inf	FALSE	Hispanic or Latino	YES	60	Female	FALSE	TRUE	FALSE	FALSE	TRUE	F	0.742	non-black
948	OUTPATIENT	High	Final result	3.5	4510-05-10	4510-05-10	Yes	CREATININE	3.5	1.05	4510-02-14	0	NA	NA	Inf	9	4510-02-14	8	#NAME?	0	6	4	FALSE	102	73	14	NA	2.19	0	0	0	1	0	1	NA	Inf	FALSE	Hispanic or Latino	YES	60	Female	FALSE	TRUE	FALSE	FALSE	TRUE	F	0.742	non-black
949	OUTPATIENT	High	Final result	3.59	4510-04-25	4510-04-25	Yes	CREATININE	3.59	1.05	4510-02-14	0	NA	NA	Inf	9	4510-02-14	8	#NAME?	0	6	4	FALSE	102	73	14	NA	2.19	0	0	0	1	0	1	NA	Inf	FALSE	Hispanic or Latino	YES	60	Female	FALSE	TRUE	FALSE	FALSE	TRUE	F	0.742	non-black
950	OUTPATIENT	High	Final result	1.44	4510-04-17	4510-04-18	Yes	CREATININE	1.44	1.05	4510-02-14	0	NA	NA	Inf	9	4510-02-14	8	#NAME?	0	6	4	FALSE	102	73	14	NA	2.19	0	0	0	1	0	1	NA	Inf	FALSE	Hispanic or Latino	YES	60	Female	FALSE	TRUE	FALSE	FALSE	TRUE	F	0.742	non-black
951	OUTPATIENT	High	Final result	5.39	4510-04-07	4510-04-07	Yes	CREATININE	5.39	1.05	4510-02-14	0	NA	NA	Inf	9	4510-02-14	8	#NAME?	0	6	4	FALSE	102	73	14	NA	2.19	0	0	0	1	0	1	NA	Inf	FALSE	Hispanic or Latino	YES	60	Female	FALSE	TRUE	FALSE	FALSE	TRUE	F	0.742	non-black
952	OUTPATIENT	High	Final result	2.5	4510-05-16	4510-05-16	Yes	CREATININE	2.5	1.05	4510-02-14	0	NA	NA	Inf	9	4510-02-14	8	#NAME?	0	6	4	FALSE	102	73	14	NA	2.19	0	0	0	1	0	1	NA	Inf	FALSE	Hispanic or Latino	YES	60	Female	FALSE	TRUE	FALSE	FALSE	TRUE	F	0.742	non-black
953	OUTPATIENT	High	Final result	1.89	4510-04-16	4510-04-16	Yes	CREATININE	1.89	1.05	4510-02-14	0	NA	NA	Inf	9	4510-02-14	8	#NAME?	0	6	4	FALSE	102	73	14	NA	2.19	0	0	0	1	0	1	NA	Inf	FALSE	Hispanic or Latino	YES	60	Female	FALSE	TRUE	FALSE	FALSE	TRUE	F	0.742	non-black
954	OUTPATIENT	High	Final result	1.51	4510-06-25	4510-06-25	Yes	CREATININE	1.51	1.05	4510-02-14	0	NA	NA	Inf	9	4510-02-14	8	#NAME?	0	6	4	FALSE	102	73	14	NA	2.19	0	0	0	1	0	1	NA	Inf	FALSE	Hispanic or Latino	YES	60	Female	FALSE	TRUE	FALSE	FALSE	TRUE	F	0.742	non-black
955	OUTPATIENT	High	Final result	2.92	4510-05-05	4510-05-05	Yes	CREATININE	2.92	1.05	4510-02-14	0	NA	NA	Inf	9	4510-02-14	8	#NAME?	0	6	4	FALSE	102	73	14	NA	2.19	0	0	0	1	0	1	NA	Inf	FALSE	Hispanic or Latino	YES	60	Female	FALSE	TRUE	FALSE	FALSE	TRUE	F	0.742	non-black
956	OUTPATIENT	High	Final result	5.41	4510-04-29	4510-04-29	Yes	CREATININE	5.41	1.05	4510-02-14	0	NA	NA	Inf	9	4510-02-14	8	#NAME?	0	6	4	FALSE	102	73	14	NA	2.19	0	0	0	1	0	1	NA	Inf	FALSE	Hispanic or Latino	YES	60	Female	FALSE	TRUE	FALSE	FALSE	TRUE	F	0.742	non-black
957	OUTPATIENT	High	Final result	2.18	4510-04-23	4510-04-23	Yes	CREATININE	2.18	1.05	4510-02-14	0	NA	NA	Inf	9	4510-02-14	8	#NAME?	0	6	4	FALSE	102	73	14	NA	2.19	0	0	0	1	0	1	NA	Inf	FALSE	Hispanic or Latino	YES	60	Female	FALSE	TRUE	FALSE	FALSE	TRUE	F	0.742	non-black
958	OUTPATIENT	High	Final result	1.73	4510-06-30	4510-06-30	Yes	CREATININE	1.73	1.05	4510-02-14	0	NA	NA	Inf	9	4510-02-14	8	#NAME?	0	6	4	FALSE	102	73	14	NA	2.19	0	0	0	1	0	1	NA	Inf	FALSE	Hispanic or Latino	YES	60	Female	FALSE	TRUE	FALSE	FALSE	TRUE	F	0.742	non-black
959	OUTPATIENT	*Unspecified	Final result	0.76	4510-05-30	4510-05-30	Yes	CREATININE	0.76	1.05	4510-02-14	0	NA	NA	Inf	9	4510-02-14	8	#NAME?	0	6	4	FALSE	102	73	14	NA	2.19	0	0	0	1	0	1	NA	Inf	FALSE	Hispanic or Latino	YES	60	Female	FALSE	TRUE	FALSE	FALSE	TRUE	F	0.742	non-black
960	OUTPATIENT	High	Final result	4.79	4510-05-22	4510-05-22	Yes	CREATININE	4.79	1.05	4510-02-14	0	NA	NA	Inf	9	4510-02-14	8	#NAME?	0	6	4	FALSE	102	73	14	NA	2.19	0	0	0	1	0	1	NA	Inf	FALSE	Hispanic or Latino	YES	60	Female	FALSE	TRUE	FALSE	FALSE	TRUE	F	0.742	non-black
961	OUTPATIENT	High	Final result	3.81	4510-04-12	4510-04-12	Yes	CREATININE	3.81	1.05	4510-02-14	0	NA	NA	Inf	9	4510-02-14	8	#NAME?	0	6	4	FALSE	102	73	14	NA	2.19	0	0	0	1	0	1	NA	Inf	FALSE	Hispanic or Latino	YES	60	Female	FALSE	TRUE	FALSE	FALSE	TRUE	F	0.742	non-black
962	OUTPATIENT	*Unspecified	Final result	0.98	4510-04-21	4510-04-21	Yes	CREATININE	0.98	1.05	4510-02-14	0	NA	NA	Inf	9	4510-02-14	8	#NAME?	0	6	4	FALSE	102	73	14	NA	2.19	0	0	0	1	0	1	NA	Inf	FALSE	Hispanic or Latino	YES	60	Female	FALSE	TRUE	FALSE	FALSE	TRUE	F	0.742	non-black
963	OUTPATIENT	*Unspecified	Final result	0.7	4510-06-12	4510-06-12	Yes	CREATININE	0.7	1.05	4510-02-14	0	NA	NA	Inf	9	4510-02-14	8	#NAME?	0	6	4	FALSE	102	73	14	NA	2.19	0	0	0	1	0	1	NA	Inf	FALSE	Hispanic or Latino	YES	60	Female	FALSE	TRUE	FALSE	FALSE	TRUE	F	0.742	non-black
964	OUTPATIENT	High	Final result	1.32	4510-06-07	4510-06-07	Yes	CREATININE	1.32	1.05	4510-02-14	0	NA	NA	Inf	9	4510-02-14	8	#NAME?	0	6	4	FALSE	102	73	14	NA	2.19	0	0	0	1	0	1	NA	Inf	FALSE	Hispanic or Latino	YES	60	Female	FALSE	TRUE	FALSE	FALSE	TRUE	F	0.742	non-black
965	OUTPATIENT	High	Final result	2.86	4510-05-07	4510-05-07	Yes	CREATININE	2.86	1.05	4510-02-14	0	NA	NA	Inf	9	4510-02-14	8	#NAME?	0	6	4	FALSE	102	73	14	NA	2.19	0	0	0	1	0	1	NA	Inf	FALSE	Hispanic or Latino	YES	60	Female	FALSE	TRUE	FALSE	FALSE	TRUE	F	0.742	non-black
966	OUTPATIENT	High	Final result	1.11	4510-06-28	4510-06-28	Yes	CREATININE	1.11	1.05	4510-02-14	0	NA	NA	Inf	9	4510-02-14	8	#NAME?	0	6	4	FALSE	102	73	14	NA	2.19	0	0	0	1	0	1	NA	Inf	FALSE	Hispanic or Latino	YES	60	Female	FALSE	TRUE	FALSE	FALSE	TRUE	F	0.742	non-black
967	OUTPATIENT	High	Final result	4.46	4510-04-27	4510-04-27	Yes	CREATININE	4.46	1.05	4510-02-14	0	NA	NA	Inf	9	4510-02-14	8	#NAME?	0	6	4	FALSE	102	73	14	NA	2.19	0	0	0	1	0	1	NA	Inf	FALSE	Hispanic or Latino	YES	60	Female	FALSE	TRUE	FALSE	FALSE	TRUE	F	0.742	non-black
968	OUTPATIENT	High	Final result	3.55	4510-05-06	4510-05-06	Yes	CREATININE	3.55	1.05	4510-02-14	0	NA	NA	Inf	9	4510-02-14	8	#NAME?	0	6	4	FALSE	102	73	14	NA	2.19	0	0	0	1	0	1	NA	Inf	FALSE	Hispanic or Latino	YES	60	Female	FALSE	TRUE	FALSE	FALSE	TRUE	F	0.742	non-black
969	OUTPATIENT	High	Final result	4.19	4510-05-20	4510-05-20	Yes	CREATININE	4.19	1.05	4510-02-14	0	NA	NA	Inf	9	4510-02-14	8	#NAME?	0	6	4	FALSE	102	73	14	NA	2.19	0	0	0	1	0	1	NA	Inf	FALSE	Hispanic or Latino	YES	60	Female	FALSE	TRUE	FALSE	FALSE	TRUE	F	0.742	non-black
970	OUTPATIENT	*Unspecified	Final result	0.72	4510-05-31	4510-05-31	Yes	CREATININE	0.72	1.05	4510-02-14	0	NA	NA	Inf	9	4510-02-14	8	#NAME?	0	6	4	FALSE	102	73	14	NA	2.19	0	0	0	1	0	1	NA	Inf	FALSE	Hispanic or Latino	YES	60	Female	FALSE	TRUE	FALSE	FALSE	TRUE	F	0.742	non-black
971	OUTPATIENT	*Unspecified	Final result	0.95	4510-06-22	4510-06-22	Yes	CREATININE	0.95	1.05	4510-02-14	0	NA	NA	Inf	9	4510-02-14	8	#NAME?	0	6	4	FALSE	102	73	14	NA	2.19	0	0	0	1	0	1	NA	Inf	FALSE	Hispanic or Latino	YES	60	Female	FALSE	TRUE	FALSE	FALSE	TRUE	F	0.742	non-black
972	OUTPATIENT	High	Final result	2.73	4510-05-09	4510-05-09	Yes	CREATININE	2.73	1.05	4510-02-14	0	NA	NA	Inf	9	4510-02-14	8	#NAME?	0	6	4	FALSE	102	73	14	NA	2.19	0	0	0	1	0	1	NA	Inf	FALSE	Hispanic or Latino	YES	60	Female	FALSE	TRUE	FALSE	FALSE	TRUE	F	0.742	non-black
973	OUTPATIENT	High	Final result	1.68	4510-06-11	4510-06-11	Yes	CREATININE	1.68	1.05	4510-02-14	0	NA	NA	Inf	9	4510-02-14	8	#NAME?	0	6	4	FALSE	102	73	14	NA	2.19	0	0	0	1	0	1	NA	Inf	FALSE	Hispanic or Latino	YES	60	Female	FALSE	TRUE	FALSE	FALSE	TRUE	F	0.742	non-black
974	OUTPATIENT	High	Final result	5.5	4510-05-23	4510-05-23	Yes	CREATININE	5.5	1.05	4510-02-14	0	NA	NA	Inf	9	4510-02-14	8	#NAME?	0	6	4	FALSE	102	73	14	NA	2.19	0	0	0	1	0	1	NA	Inf	FALSE	Hispanic or Latino	YES	60	Female	FALSE	TRUE	FALSE	FALSE	TRUE	F	0.742	non-black
975	OUTPATIENT	High	Final result	4.53	4510-05-21	4510-05-21	Yes	CREATININE	4.53	1.05	4510-02-14	0	NA	NA	Inf	9	4510-02-14	8	#NAME?	0	6	4	FALSE	102	73	14	NA	2.19	0	0	0	1	0	1	NA	Inf	FALSE	Hispanic or Latino	YES	60	Female	FALSE	TRUE	FALSE	FALSE	TRUE	F	0.742	non-black
976	OUTPATIENT	High	Final result	2.66	4510-05-18	4510-05-18	Yes	CREATININE	2.66	1.05	4510-02-14	0	NA	NA	Inf	9	4510-02-14	8	#NAME?	0	6	4	FALSE	102	73	14	NA	2.19	0	0	0	1	0	1	NA	Inf	FALSE	Hispanic or Latino	YES	60	Female	FALSE	TRUE	FALSE	FALSE	TRUE	F	0.742	non-black
977	OUTPATIENT	High	Final result	2.07	4510-06-18	4510-06-18	Yes	CREATININE	2.07	1.05	4510-02-14	0	NA	NA	Inf	9	4510-02-14	8	#NAME?	0	6	4	FALSE	102	73	14	NA	2.19	0	0	0	1	0	1	NA	Inf	FALSE	Hispanic or Latino	YES	60	Female	FALSE	TRUE	FALSE	FALSE	TRUE	F	0.742	non-black
978	OUTPATIENT	High	Final result	3.33	4510-05-01	4510-05-01	Yes	CREATININE	3.33	1.05	4510-02-14	0	NA	NA	Inf	9	4510-02-14	8	#NAME?	0	6	4	FALSE	102	73	14	NA	2.19	0	0	0	1	0	1	NA	Inf	FALSE	Hispanic or Latino	YES	60	Female	FALSE	TRUE	FALSE	FALSE	TRUE	F	0.742	non-black
979	OUTPATIENT	High	Final result	1.75	4510-05-25	4510-05-26	Yes	CREATININE	1.75	1.05	4510-02-14	0	NA	NA	Inf	9	4510-02-14	8	#NAME?	0	6	4	FALSE	102	73	14	NA	2.19	0	0	0	1	0	1	NA	Inf	FALSE	Hispanic or Latino	YES	60	Female	FALSE	TRUE	FALSE	FALSE	TRUE	F	0.742	non-black
980	OUTPATIENT	High	Final result	1.5	4510-06-15	4510-06-15	Yes	CREATININE	1.5	1.05	4510-02-14	0	NA	NA	Inf	9	4510-02-14	8	#NAME?	0	6	4	FALSE	102	73	14	NA	2.19	0	0	0	1	0	1	NA	Inf	FALSE	Hispanic or Latino	YES	60	Female	FALSE	TRUE	FALSE	FALSE	TRUE	F	0.742	non-black
981	OUTPATIENT	High	Final result	4.07	4510-05-20	4510-05-20	Yes	CREATININE	4.07	1.05	4510-02-14	0	NA	NA	Inf	9	4510-02-14	8	#NAME?	0	6	4	FALSE	102	73	14	NA	2.19	0	0	0	1	0	1	NA	Inf	FALSE	Hispanic or Latino	YES	60	Female	FALSE	TRUE	FALSE	FALSE	TRUE	F	0.742	non-black
982	OUTPATIENT	High	Final result	3.76	4510-04-26	4510-04-26	Yes	CREATININE	3.76	1.05	4510-02-14	0	NA	NA	Inf	9	4510-02-14	8	#NAME?	0	6	4	FALSE	102	73	14	NA	2.19	0	0	0	1	0	1	NA	Inf	FALSE	Hispanic or Latino	YES	60	Female	FALSE	TRUE	FALSE	FALSE	TRUE	F	0.742	non-black
983	OUTPATIENT	*Unspecified	Final result	0.93	4510-05-28	4510-05-28	Yes	CREATININE	0.93	1.05	4510-02-14	0	NA	NA	Inf	9	4510-02-14	8	#NAME?	0	6	4	FALSE	102	73	14	NA	2.19	0	0	0	1	0	1	NA	Inf	FALSE	Hispanic or Latino	YES	60	Female	FALSE	TRUE	FALSE	FALSE	TRUE	F	0.742	non-black
984	OUTPATIENT	*Unspecified	Final result	0.82	4510-05-29	4510-05-29	Yes	CREATININE	0.82	1.05	4510-02-14	0	NA	NA	Inf	9	4510-02-14	8	#NAME?	0	6	4	FALSE	102	73	14	NA	2.19	0	0	0	1	0	1	NA	Inf	FALSE	Hispanic or Latino	YES	60	Female	FALSE	TRUE	FALSE	FALSE	TRUE	F	0.742	non-black
985	OUTPATIENT	*Unspecified	Final result	0.79	4510-06-07	4510-06-07	Yes	CREATININE	0.79	1.05	4510-02-14	0	NA	NA	Inf	9	4510-02-14	8	#NAME?	0	6	4	FALSE	102	73	14	NA	2.19	0	0	0	1	0	1	NA	Inf	FALSE	Hispanic or Latino	YES	60	Female	FALSE	TRUE	FALSE	FALSE	TRUE	F	0.742	non-black
986	OUTPATIENT	High	Final result	1.94	4510-08-26	4510-08-26	Yes	CREATININE	1.94	1.05	4510-02-14	0	NA	NA	Inf	9	4510-02-14	8	#NAME?	0	6	4	FALSE	102	73	14	NA	2.19	0	0	0	1	0	1	NA	Inf	FALSE	Hispanic or Latino	YES	60	Female	FALSE	TRUE	FALSE	FALSE	TRUE	F	0.742	non-black
987	OUTPATIENT	High	Final result	1.67	4510-08-23	4510-08-23	Yes	CREATININE	1.67	1.05	4510-02-14	0	NA	NA	Inf	9	4510-02-14	8	#NAME?	0	6	4	FALSE	102	73	14	NA	2.19	0	0	0	1	0	1	NA	Inf	FALSE	Hispanic or Latino	YES	60	Female	FALSE	TRUE	FALSE	FALSE	TRUE	F	0.742	non-black
988	OUTPATIENT	High	Final result	1.51	4510-08-24	4510-08-24	Yes	CREATININE	1.51	1.05	4510-02-14	0	NA	NA	Inf	9	4510-02-14	8	#NAME?	0	6	4	FALSE	102	73	14	NA	2.19	0	0	0	1	0	1	NA	Inf	FALSE	Hispanic or Latino	YES	60	Female	FALSE	TRUE	FALSE	FALSE	TRUE	F	0.742	non-black
989	OUTPATIENT	High	Final result	1.75	4510-08-25	4510-08-25	Yes	CREATININE	1.75	1.05	4510-02-14	0	NA	NA	Inf	9	4510-02-14	8	#NAME?	0	6	4	FALSE	102	73	14	NA	2.19	0	0	0	1	0	1	NA	Inf	FALSE	Hispanic or Latino	YES	60	Female	FALSE	TRUE	FALSE	FALSE	TRUE	F	0.742	non-black
990	OUTPATIENT	High	Final result	2.97	4510-05-24	4510-05-24	Yes	CREATININE	2.97	1.05	4510-02-14	0	NA	NA	Inf	9	4510-02-14	8	#NAME?	0	6	4	FALSE	102	73	14	NA	2.19	0	0	0	1	0	1	NA	Inf	FALSE	Hispanic or Latino	YES	60	Female	FALSE	TRUE	FALSE	FALSE	TRUE	F	0.742	non-black
991	OUTPATIENT	High	Final result	2.4	4510-05-03	4510-05-03	Yes	CREATININE	2.4	1.05	4510-02-14	0	NA	NA	Inf	9	4510-02-14	8	#NAME?	0	6	4	FALSE	102	73	14	NA	2.19	0	0	0	1	0	1	NA	Inf	FALSE	Hispanic or Latino	YES	60	Female	FALSE	TRUE	FALSE	FALSE	TRUE	F	0.742	non-black
992	OUTPATIENT	High	Final result	1.28	4510-06-19	4510-06-19	Yes	CREATININE	1.28	1.05	4510-02-14	0	NA	NA	Inf	9	4510-02-14	8	#NAME?	0	6	4	FALSE	102	73	14	NA	2.19	0	0	0	1	0	1	NA	Inf	FALSE	Hispanic or Latino	YES	60	Female	FALSE	TRUE	FALSE	FALSE	TRUE	F	0.742	non-black
993	OUTPATIENT	High	Final result	3.76	4510-05-15	4510-05-15	Yes	CREATININE	3.76	1.05	4510-02-14	0	NA	NA	Inf	9	4510-02-14	8	#NAME?	0	6	4	FALSE	102	73	14	NA	2.19	0	0	0	1	0	1	NA	Inf	FALSE	Hispanic or Latino	YES	60	Female	FALSE	TRUE	FALSE	FALSE	TRUE	F	0.742	non-black
994	OUTPATIENT	*Unspecified	Final result	1.08	4510-06-12	4510-06-12	Yes	CREATININE	1.08	1.05	4510-02-14	0	NA	NA	Inf	9	4510-02-14	8	#NAME?	0	6	4	FALSE	102	73	14	NA	2.19	0	0	0	1	0	1	NA	Inf	FALSE	Hispanic or Latino	YES	60	Female	FALSE	TRUE	FALSE	FALSE	TRUE	F	0.742	non-black
995	OUTPATIENT	*Unspecified	Final result	0.97	4510-05-27	4510-05-27	Yes	CREATININE	0.97	1.05	4510-02-14	0	NA	NA	Inf	9	4510-02-14	8	#NAME?	0	6	4	FALSE	102	73	14	NA	2.19	0	0	0	1	0	1	NA	Inf	FALSE	Hispanic or Latino	YES	60	Female	FALSE	TRUE	FALSE	FALSE	TRUE	F	0.742	non-black
996	OUTPATIENT	High	Final result	2.07	4510-06-18	4510-06-18	Yes	CREATININE	2.07	1.05	4510-02-14	0	NA	NA	Inf	9	4510-02-14	8	#NAME?	0	6	4	FALSE	102	73	14	NA	2.19	0	0	0	1	0	1	NA	Inf	FALSE	Hispanic or Latino	YES	60	Female	FALSE	TRUE	FALSE	FALSE	TRUE	F	0.742	non-black
997	OUTPATIENT	High	Final result	1.16	4510-04-19	4510-04-19	Yes	CREATININE	1.16	1.05	4510-02-14	0	NA	NA	Inf	9	4510-02-14	8	#NAME?	0	6	4	FALSE	102	73	14	NA	2.19	0	0	0	1	0	1	NA	Inf	FALSE	Hispanic or Latino	YES	60	Female	FALSE	TRUE	FALSE	FALSE	TRUE	F	0.742	non-black
998	OUTPATIENT	High	Final result	4.62	4510-04-13	4510-04-13	Yes	CREATININE	4.62	1.05	4510-02-14	0	NA	NA	Inf	9	4510-02-14	8	#NAME?	0	6	4	FALSE	102	73	14	NA	2.19	0	0	0	1	0	1	NA	Inf	FALSE	Hispanic or Latino	YES	60	Female	FALSE	TRUE	FALSE	FALSE	TRUE	F	0.742	non-black
999	OUTPATIENT	High	Final result	1.29	4510-04-18	4510-04-18	Yes	CREATININE	1.29	1.05	4510-02-14	0	NA	NA	Inf	9	4510-02-14	8	#NAME?	0	6	4	FALSE	102	73	14	NA	2.19	0	0	0	1	0	1	NA	Inf	FALSE	Hispanic or Latino	YES	60	Female	FALSE	TRUE	FALSE	FALSE	TRUE	F	0.742	non-black
1000	OUTPATIENT	High	Final result	5.39	4510-04-14	4510-04-14	Yes	CREATININE	5.39	1.05	4510-02-14	0	NA	NA	Inf	9	4510-02-14	8	#NAME?	0	6	4	FALSE	102	73	14	NA	2.19	0	0	0	1	0	1	NA	Inf	FALSE	Hispanic or Latino	YES	60	Female	FALSE	TRUE	FALSE	FALSE	TRUE	F	0.742	non-black
1001	OUTPATIENT	High	Final result	1.94	4510-04-16	4510-04-16	Yes	CREATININE	1.94	1.05	4510-02-14	0	NA	NA	Inf	9	4510-02-14	8	#NAME?	0	6	4	FALSE	102	73	14	NA	2.19	0	0	0	1	0	1	NA	Inf	FALSE	Hispanic or Latino	YES	60	Female	FALSE	TRUE	FALSE	FALSE	TRUE	F	0.742	non-black
1002	OUTPATIENT	High	Final result	1.63	4510-08-13	4510-08-13	Yes	CREATININE	1.63	1.05	4510-02-14	0	NA	NA	Inf	9	4510-02-14	8	#NAME?	0	6	4	FALSE	102	73	14	NA	2.19	0	0	0	1	0	1	NA	Inf	FALSE	Hispanic or Latino	YES	60	Female	FALSE	TRUE	FALSE	FALSE	TRUE	F	0.742	non-black
1003	OUTPATIENT	High	Final result	1.18	4510-07-21	4510-07-21	Yes	CREATININE	1.18	1.05	4510-02-14	0	NA	NA	Inf	9	4510-02-14	8	#NAME?	0	6	4	FALSE	102	73	14	NA	2.19	0	0	0	1	0	1	NA	Inf	FALSE	Hispanic or Latino	YES	60	Female	FALSE	TRUE	FALSE	FALSE	TRUE	F	0.742	non-black
1004	OUTPATIENT	*Unspecified	Final result	0.5	4510-08-01	4510-08-01	Yes	CREATININE	0.5	1.05	4510-02-14	0	NA	NA	Inf	9	4510-02-14	8	#NAME?	0	6	4	FALSE	102	73	14	NA	2.19	0	0	0	1	0	1	NA	Inf	FALSE	Hispanic or Latino	YES	60	Female	FALSE	TRUE	FALSE	FALSE	TRUE	F	0.742	non-black
1005	OUTPATIENT	*Unspecified	Final result	0.77	4510-07-26	4510-07-26	Yes	CREATININE	0.77	1.05	4510-02-14	0	NA	NA	Inf	9	4510-02-14	8	#NAME?	0	6	4	FALSE	102	73	14	NA	2.19	0	0	0	1	0	1	NA	Inf	FALSE	Hispanic or Latino	YES	60	Female	FALSE	TRUE	FALSE	FALSE	TRUE	F	0.742	non-black
1006	OUTPATIENT	High	Final result	1.88	4510-08-11	4510-08-11	Yes	CREATININE	1.88	1.05	4510-02-14	0	NA	NA	Inf	9	4510-02-14	8	#NAME?	0	6	4	FALSE	102	73	14	NA	2.19	0	0	0	1	0	1	NA	Inf	FALSE	Hispanic or Latino	YES	60	Female	FALSE	TRUE	FALSE	FALSE	TRUE	F	0.742	non-black
1007	OUTPATIENT	High	Final result	1.45	4510-06-04	4510-06-04	Yes	CREATININE	1.45	1.05	4510-02-14	0	NA	NA	Inf	9	4510-02-14	8	#NAME?	0	6	4	FALSE	102	73	14	NA	2.19	0	0	0	1	0	1	NA	Inf	FALSE	Hispanic or Latino	YES	60	Female	FALSE	TRUE	FALSE	FALSE	TRUE	F	0.742	non-black
1008	OUTPATIENT	High	Final result	4.96	4510-04-28	4510-04-28	Yes	CREATININE	4.96	1.05	4510-02-14	0	NA	NA	Inf	9	4510-02-14	8	#NAME?	0	6	4	FALSE	102	73	14	NA	2.19	0	0	0	1	0	1	NA	Inf	FALSE	Hispanic or Latino	YES	60	Female	FALSE	TRUE	FALSE	FALSE	TRUE	F	0.742	non-black
1009	OUTPATIENT	High	Final result	3.97	4510-04-30	4510-04-30	Yes	CREATININE	3.97	1.05	4510-02-14	0	NA	NA	Inf	9	4510-02-14	8	#NAME?	0	6	4	FALSE	102	73	14	NA	2.19	0	0	0	1	0	1	NA	Inf	FALSE	Hispanic or Latino	YES	60	Female	FALSE	TRUE	FALSE	FALSE	TRUE	F	0.742	non-black
1010	OUTPATIENT	High	Final result	1.71	4510-05-25	4510-05-25	Yes	CREATININE	1.71	1.05	4510-02-14	0	NA	NA	Inf	9	4510-02-14	8	#NAME?	0	6	4	FALSE	102	73	14	NA	2.19	0	0	0	1	0	1	NA	Inf	FALSE	Hispanic or Latino	YES	60	Female	FALSE	TRUE	FALSE	FALSE	TRUE	F	0.742	non-black
1011	OUTPATIENT	High	Final result	1.26	4510-05-26	4510-05-26	Yes	CREATININE	1.26	1.05	4510-02-14	0	NA	NA	Inf	9	4510-02-14	8	#NAME?	0	6	4	FALSE	102	73	14	NA	2.19	0	0	0	1	0	1	NA	Inf	FALSE	Hispanic or Latino	YES	60	Female	FALSE	TRUE	FALSE	FALSE	TRUE	F	0.742	non-black
1012	OUTPATIENT	High	Final result	1.93	4510-06-17	4510-06-17	Yes	CREATININE	1.93	1.05	4510-02-14	0	NA	NA	Inf	9	4510-02-14	8	#NAME?	0	6	4	FALSE	102	73	14	NA	2.19	0	0	0	1	0	1	NA	Inf	FALSE	Hispanic or Latino	YES	60	Female	FALSE	TRUE	FALSE	FALSE	TRUE	F	0.742	non-black
1013	OUTPATIENT	High	Final result	3.99	4510-04-26	4510-04-26	Yes	CREATININE	3.99	1.05	4510-02-14	0	NA	NA	Inf	9	4510-02-14	8	#NAME?	0	6	4	FALSE	102	73	14	NA	2.19	0	0	0	1	0	1	NA	Inf	FALSE	Hispanic or Latino	YES	60	Female	FALSE	TRUE	FALSE	FALSE	TRUE	F	0.742	non-black
1014	OUTPATIENT	High	Final result	1.55	4510-04-17	4510-04-17	Yes	CREATININE	1.55	1.05	4510-02-14	0	NA	NA	Inf	9	4510-02-14	8	#NAME?	0	6	4	FALSE	102	73	14	NA	2.19	0	0	0	1	0	1	NA	Inf	FALSE	Hispanic or Latino	YES	60	Female	FALSE	TRUE	FALSE	FALSE	TRUE	F	0.742	non-black
1015	OUTPATIENT	*Unspecified	Final result	1.09	4510-04-19	4510-04-20	Yes	CREATININE	1.09	1.05	4510-02-14	0	NA	NA	Inf	9	4510-02-14	8	#NAME?	0	6	4	FALSE	102	73	14	NA	2.19	0	0	0	1	0	1	NA	Inf	FALSE	Hispanic or Latino	YES	60	Female	FALSE	TRUE	FALSE	FALSE	TRUE	F	0.742	non-black
1016	OUTPATIENT	*Unspecified	Final result	0.95	4510-06-12	4510-06-12	Yes	CREATININE	0.95	1.05	4510-02-14	0	NA	NA	Inf	9	4510-02-14	8	#NAME?	0	6	4	FALSE	102	73	14	NA	2.19	0	0	0	1	0	1	NA	Inf	FALSE	Hispanic or Latino	YES	60	Female	FALSE	TRUE	FALSE	FALSE	TRUE	F	0.742	non-black
1017	OUTPATIENT	*Unspecified	Final result	0.82	4510-07-29	4510-07-29	Yes	CREATININE	0.82	1.05	4510-02-14	0	NA	NA	Inf	9	4510-02-14	8	#NAME?	0	6	4	FALSE	102	73	14	NA	2.19	0	0	0	1	0	1	NA	Inf	FALSE	Hispanic or Latino	YES	60	Female	FALSE	TRUE	FALSE	FALSE	TRUE	F	0.742	non-black
1018	OUTPATIENT	High	Final result	1.51	4510-07-14	4510-07-14	Yes	CREATININE	1.51	1.05	4510-02-14	0	NA	NA	Inf	9	4510-02-14	8	#NAME?	0	6	4	FALSE	102	73	14	NA	2.19	0	0	0	1	0	1	NA	Inf	FALSE	Hispanic or Latino	YES	60	Female	FALSE	TRUE	FALSE	FALSE	TRUE	F	0.742	non-black
1019	OUTPATIENT	High	Final result	1.26	4510-07-27	4510-07-28	Yes	CREATININE	1.26	1.05	4510-02-14	0	NA	NA	Inf	9	4510-02-14	8	#NAME?	0	6	4	FALSE	102	73	14	NA	2.19	0	0	0	1	0	1	NA	Inf	FALSE	Hispanic or Latino	YES	60	Female	FALSE	TRUE	FALSE	FALSE	TRUE	F	0.742	non-black
1020	OUTPATIENT	High	Final result	1.32	4510-07-28	4510-07-28	Yes	CREATININE	1.32	1.05	4510-02-14	0	NA	NA	Inf	9	4510-02-14	8	#NAME?	0	6	4	FALSE	102	73	14	NA	2.19	0	0	0	1	0	1	NA	Inf	FALSE	Hispanic or Latino	YES	60	Female	FALSE	TRUE	FALSE	FALSE	TRUE	F	0.742	non-black
1021	OUTPATIENT	High	Final result	1.53	4510-07-22	4510-07-22	Yes	CREATININE	1.53	1.05	4510-02-14	0	NA	NA	Inf	9	4510-02-14	8	#NAME?	0	6	4	FALSE	102	73	14	NA	2.19	0	0	0	1	0	1	NA	Inf	FALSE	Hispanic or Latino	YES	60	Female	FALSE	TRUE	FALSE	FALSE	TRUE	F	0.742	non-black
1022	OUTPATIENT	*Unspecified	Final result	0.79	4510-08-02	4510-08-02	Yes	CREATININE	0.79	1.05	4510-02-14	0	NA	NA	Inf	9	4510-02-14	8	#NAME?	0	6	4	FALSE	102	73	14	NA	2.19	0	0	0	1	0	1	NA	Inf	FALSE	Hispanic or Latino	YES	60	Female	FALSE	TRUE	FALSE	FALSE	TRUE	F	0.742	non-black
1023	OUTPATIENT	High	Final result	2	4510-08-27	4510-08-27	Yes	CREATININE	2	1.05	4510-02-14	0	NA	NA	Inf	9	4510-02-14	8	#NAME?	0	6	4	FALSE	102	73	14	NA	2.19	0	0	0	1	0	1	NA	Inf	FALSE	Hispanic or Latino	YES	60	Female	FALSE	TRUE	FALSE	FALSE	TRUE	F	0.742	non-black
1024	OUTPATIENT	*Unspecified	Final result	1.05	4510-06-26	4510-06-26	Yes	CREATININE	1.05	1.05	4510-02-14	0	NA	NA	Inf	9	4510-02-14	8	#NAME?	0	6	4	FALSE	102	73	14	NA	2.19	0	0	0	1	0	1	NA	Inf	FALSE	Hispanic or Latino	YES	60	Female	FALSE	TRUE	FALSE	FALSE	TRUE	F	0.742	non-black
1025	OUTPATIENT	High	Final result	2.17	4510-06-18	4510-06-18	Yes	CREATININE	2.17	1.05	4510-02-14	0	NA	NA	Inf	9	4510-02-14	8	#NAME?	0	6	4	FALSE	102	73	14	NA	2.19	0	0	0	1	0	1	NA	Inf	FALSE	Hispanic or Latino	YES	60	Female	FALSE	TRUE	FALSE	FALSE	TRUE	F	0.742	non-black
1026	OUTPATIENT	High	Final result	2.62	4510-05-24	4510-05-24	Yes	CREATININE	2.62	1.05	4510-02-14	0	NA	NA	Inf	9	4510-02-14	8	#NAME?	0	6	4	FALSE	102	73	14	NA	2.19	0	0	0	1	0	1	NA	Inf	FALSE	Hispanic or Latino	YES	60	Female	FALSE	TRUE	FALSE	FALSE	TRUE	F	0.742	non-black
1027	OUTPATIENT	High	Final result	2.97	4510-05-24	4510-05-24	Yes	CREATININE	2.97	1.05	4510-02-14	0	NA	NA	Inf	9	4510-02-14	8	#NAME?	0	6	4	FALSE	102	73	14	NA	2.19	0	0	0	1	0	1	NA	Inf	FALSE	Hispanic or Latino	YES	60	Female	FALSE	TRUE	FALSE	FALSE	TRUE	F	0.742	non-black
1028	OUTPATIENT	High	Final result	3.34	4510-05-04	4510-05-04	Yes	CREATININE	3.34	1.05	4510-02-14	0	NA	NA	Inf	9	4510-02-14	8	#NAME?	0	6	4	FALSE	102	73	14	NA	2.19	0	0	0	1	0	1	NA	Inf	FALSE	Hispanic or Latino	YES	60	Female	FALSE	TRUE	FALSE	FALSE	TRUE	F	0.742	non-black
1029	OUTPATIENT	*Unspecified	Final result	0.65	4510-07-30	4510-07-30	Yes	CREATININE	0.65	1.05	4510-02-14	0	NA	NA	Inf	9	4510-02-14	8	#NAME?	0	6	4	FALSE	102	73	14	NA	2.19	0	0	0	1	0	1	NA	Inf	FALSE	Hispanic or Latino	YES	60	Female	FALSE	TRUE	FALSE	FALSE	TRUE	F	0.742	non-black
1030	OUTPATIENT	High	Final result	1.46	4510-07-16	4510-07-16	Yes	CREATININE	1.46	1.05	4510-02-14	0	NA	NA	Inf	9	4510-02-14	8	#NAME?	0	6	4	FALSE	102	73	14	NA	2.19	0	0	0	1	0	1	NA	Inf	FALSE	Hispanic or Latino	YES	60	Female	FALSE	TRUE	FALSE	FALSE	TRUE	F	0.742	non-black
1031	OUTPATIENT	*Unspecified	Final result	1.04	4510-07-12	4510-07-12	Yes	CREATININE	1.04	1.05	4510-02-14	0	NA	NA	Inf	9	4510-02-14	8	#NAME?	0	6	4	FALSE	102	73	14	NA	2.19	0	0	0	1	0	1	NA	Inf	FALSE	Hispanic or Latino	YES	60	Female	FALSE	TRUE	FALSE	FALSE	TRUE	F	0.742	non-black
1032	OUTPATIENT	*Unspecified	Final result	0.92	4510-07-25	4510-07-25	Yes	CREATININE	0.92	1.05	4510-02-14	0	NA	NA	Inf	9	4510-02-14	8	#NAME?	0	6	4	FALSE	102	73	14	NA	2.19	0	0	0	1	0	1	NA	Inf	FALSE	Hispanic or Latino	YES	60	Female	FALSE	TRUE	FALSE	FALSE	TRUE	F	0.742	non-black
1033	OUTPATIENT	High	Final result	1.71	4510-07-07	4510-07-07	Yes	CREATININE	1.71	1.05	4510-02-14	0	NA	NA	Inf	9	4510-02-14	8	#NAME?	0	6	4	FALSE	102	73	14	NA	2.19	0	0	0	1	0	1	NA	Inf	FALSE	Hispanic or Latino	YES	60	Female	FALSE	TRUE	FALSE	FALSE	TRUE	F	0.742	non-black
1034	OUTPATIENT	High	Final result	1.43	4510-07-11	4510-07-11	Yes	CREATININE	1.43	1.05	4510-02-14	0	NA	NA	Inf	9	4510-02-14	8	#NAME?	0	6	4	FALSE	102	73	14	NA	2.19	0	0	0	1	0	1	NA	Inf	FALSE	Hispanic or Latino	YES	60	Female	FALSE	TRUE	FALSE	FALSE	TRUE	F	0.742	non-black
1035	OUTPATIENT	*Unspecified	Final result	1.03	4510-06-14	4510-06-14	Yes	CREATININE	1.03	1.05	4510-02-14	0	NA	NA	Inf	9	4510-02-14	8	#NAME?	0	6	4	FALSE	102	73	14	NA	2.19	0	0	0	1	0	1	NA	Inf	FALSE	Hispanic or Latino	YES	60	Female	FALSE	TRUE	FALSE	FALSE	TRUE	F	0.742	non-black
1036	OUTPATIENT	High	Final result	1.4	4510-07-13	4510-07-13	Yes	CREATININE	1.4	1.05	4510-02-14	0	NA	NA	Inf	9	4510-02-14	8	#NAME?	0	6	4	FALSE	102	73	14	NA	2.19	0	0	0	1	0	1	NA	Inf	FALSE	Hispanic or Latino	YES	60	Female	FALSE	TRUE	FALSE	FALSE	TRUE	F	0.742	non-black
1037	OUTPATIENT	High	Final result	1.84	4510-08-08	4510-08-08	Yes	CREATININE	1.84	1.05	4510-02-14	0	NA	NA	Inf	9	4510-02-14	8	#NAME?	0	6	4	FALSE	102	73	14	NA	2.19	0	0	0	1	0	1	NA	Inf	FALSE	Hispanic or Latino	YES	60	Female	FALSE	TRUE	FALSE	FALSE	TRUE	F	0.742	non-black
1038	OUTPATIENT	High	Final result	1.73	4510-08-18	4510-08-18	Yes	CREATININE	1.73	1.05	4510-02-14	0	NA	NA	Inf	9	4510-02-14	8	#NAME?	0	6	4	FALSE	102	73	14	NA	2.19	0	0	0	1	0	1	NA	Inf	FALSE	Hispanic or Latino	YES	60	Female	FALSE	TRUE	FALSE	FALSE	TRUE	F	0.742	non-black
1039	OUTPATIENT	High	Final result	1.21	4510-07-15	4510-07-15	Yes	CREATININE	1.21	1.05	4510-02-14	0	NA	NA	Inf	9	4510-02-14	8	#NAME?	0	6	4	FALSE	102	73	14	NA	2.19	0	0	0	1	0	1	NA	Inf	FALSE	Hispanic or Latino	YES	60	Female	FALSE	TRUE	FALSE	FALSE	TRUE	F	0.742	non-black
1040	OUTPATIENT	*Unspecified	Final result	1.05	4510-07-28	4510-07-28	Yes	CREATININE	1.05	1.05	4510-02-14	0	NA	NA	Inf	9	4510-02-14	8	#NAME?	0	6	4	FALSE	102	73	14	NA	2.19	0	0	0	1	0	1	NA	Inf	FALSE	Hispanic or Latino	YES	60	Female	FALSE	TRUE	FALSE	FALSE	TRUE	F	0.742	non-black
1041	OUTPATIENT	*Unspecified	Final result	0.65	4510-08-16	4510-08-16	Yes	CREATININE	0.65	1.05	4510-02-14	0	NA	NA	Inf	9	4510-02-14	8	#NAME?	0	6	4	FALSE	102	73	14	NA	2.19	0	0	0	1	0	1	NA	Inf	FALSE	Hispanic or Latino	YES	60	Female	FALSE	TRUE	FALSE	FALSE	TRUE	F	0.742	non-black
1042	OUTPATIENT	High	Final result	2.73	4510-05-01	4510-05-01	Yes	CREATININE	2.73	1.05	4510-02-14	0	NA	NA	Inf	9	4510-02-14	8	#NAME?	0	6	4	FALSE	102	73	14	NA	2.19	0	0	0	1	0	1	NA	Inf	FALSE	Hispanic or Latino	YES	60	Female	FALSE	TRUE	FALSE	FALSE	TRUE	F	0.742	non-black
1043	OUTPATIENT	High	Final result	1.54	4510-04-17	4510-04-17	Yes	CREATININE	1.54	1.05	4510-02-14	0	NA	NA	Inf	9	4510-02-14	8	#NAME?	0	6	4	FALSE	102	73	14	NA	2.19	0	0	0	1	0	1	NA	Inf	FALSE	Hispanic or Latino	YES	60	Female	FALSE	TRUE	FALSE	FALSE	TRUE	F	0.742	non-black
1044	OUTPATIENT	High	Final result	1.4	4510-08-14	4510-08-14	Yes	CREATININE	1.4	1.05	4510-02-14	0	NA	NA	Inf	9	4510-02-14	8	#NAME?	0	6	4	FALSE	102	73	14	NA	2.19	0	0	0	1	0	1	NA	Inf	FALSE	Hispanic or Latino	YES	60	Female	FALSE	TRUE	FALSE	FALSE	TRUE	F	0.742	non-black
1045	OUTPATIENT	High	Final result	1.66	4510-08-09	4510-08-09	Yes	CREATININE	1.66	1.05	4510-02-14	0	NA	NA	Inf	9	4510-02-14	8	#NAME?	0	6	4	FALSE	102	73	14	NA	2.19	0	0	0	1	0	1	NA	Inf	FALSE	Hispanic or Latino	YES	60	Female	FALSE	TRUE	FALSE	FALSE	TRUE	F	0.742	non-black
1046	OUTPATIENT	High	Final result	1.2	4510-07-21	4510-07-21	Yes	CREATININE	1.2	1.05	4510-02-14	0	NA	NA	Inf	9	4510-02-14	8	#NAME?	0	6	4	FALSE	102	73	14	NA	2.19	0	0	0	1	0	1	NA	Inf	FALSE	Hispanic or Latino	YES	60	Female	FALSE	TRUE	FALSE	FALSE	TRUE	F	0.742	non-black
1047	OUTPATIENT	High	Final result	1.64	4510-07-14	4510-07-14	Yes	CREATININE	1.64	1.05	4510-02-14	0	NA	NA	Inf	9	4510-02-14	8	#NAME?	0	6	4	FALSE	102	73	14	NA	2.19	0	0	0	1	0	1	NA	Inf	FALSE	Hispanic or Latino	YES	60	Female	FALSE	TRUE	FALSE	FALSE	TRUE	F	0.742	non-black
1048	OUTPATIENT	High	Final result	1.42	4510-07-22	4510-07-22	Yes	CREATININE	1.42	1.05	4510-02-14	0	NA	NA	Inf	9	4510-02-14	8	#NAME?	0	6	4	FALSE	102	73	14	NA	2.19	0	0	0	1	0	1	NA	Inf	FALSE	Hispanic or Latino	YES	60	Female	FALSE	TRUE	FALSE	FALSE	TRUE	F	0.742	non-black
1049	OUTPATIENT	High	Final result	1.79	4510-08-23	4510-08-23	Yes	CREATININE	1.79	1.05	4510-02-14	0	NA	NA	Inf	9	4510-02-14	8	#NAME?	0	6	4	FALSE	102	73	14	NA	2.19	0	0	0	1	0	1	NA	Inf	FALSE	Hispanic or Latino	YES	60	Female	FALSE	TRUE	FALSE	FALSE	TRUE	F	0.742	non-black
1050	OUTPATIENT	High	Final result	1.63	4510-08-22	4510-08-22	Yes	CREATININE	1.63	1.05	4510-02-14	0	NA	NA	Inf	9	4510-02-14	8	#NAME?	0	6	4	FALSE	102	73	14	NA	2.19	0	0	0	1	0	1	NA	Inf	FALSE	Hispanic or Latino	YES	60	Female	FALSE	TRUE	FALSE	FALSE	TRUE	F	0.742	non-black
1051	OUTPATIENT	*Unspecified	Final result	0.82	4510-06-10	4510-06-10	Yes	CREATININE	0.82	1.05	4510-02-14	0	NA	NA	Inf	9	4510-02-14	8	#NAME?	0	6	4	FALSE	102	73	14	NA	2.19	0	0	0	1	0	1	NA	Inf	FALSE	Hispanic or Latino	YES	60	Female	FALSE	TRUE	FALSE	FALSE	TRUE	F	0.742	non-black
1052	OUTPATIENT	*Unspecified	Final result	1.03	4510-04-21	4510-04-21	Yes	CREATININE	1.03	1.05	4510-02-14	0	NA	NA	Inf	9	4510-02-14	8	#NAME?	0	6	4	FALSE	102	73	14	NA	2.19	0	0	0	1	0	1	NA	Inf	FALSE	Hispanic or Latino	YES	60	Female	FALSE	TRUE	FALSE	FALSE	TRUE	F	0.742	non-black
1053	OUTPATIENT	*Unspecified	Final result	1.09	4510-06-05	4510-06-05	Yes	CREATININE	1.09	1.05	4510-02-14	0	NA	NA	Inf	9	4510-02-14	8	#NAME?	0	6	4	FALSE	102	73	14	NA	2.19	0	0	0	1	0	1	NA	Inf	FALSE	Hispanic or Latino	YES	60	Female	FALSE	TRUE	FALSE	FALSE	TRUE	F	0.742	non-black
1054	OUTPATIENT	*Unspecified	Final result	1.09	4510-06-03	4510-06-03	Yes	CREATININE	1.09	1.05	4510-02-14	0	NA	NA	Inf	9	4510-02-14	8	#NAME?	0	6	4	FALSE	102	73	14	NA	2.19	0	0	0	1	0	1	NA	Inf	FALSE	Hispanic or Latino	YES	60	Female	FALSE	TRUE	FALSE	FALSE	TRUE	F	0.742	non-black
1055	OUTPATIENT	*Unspecified	Final result	0.92	4510-06-24	4510-06-24	Yes	CREATININE	0.92	1.05	4510-02-14	0	NA	NA	Inf	9	4510-02-14	8	#NAME?	0	6	4	FALSE	102	73	14	NA	2.19	0	0	0	1	0	1	NA	Inf	FALSE	Hispanic or Latino	YES	60	Female	FALSE	TRUE	FALSE	FALSE	TRUE	F	0.742	non-black
1056	OUTPATIENT	High	Final result	2.35	4510-05-25	4510-05-25	Yes	CREATININE	2.35	1.05	4510-02-14	0	NA	NA	Inf	9	4510-02-14	8	#NAME?	0	6	4	FALSE	102	73	14	NA	2.19	0	0	0	1	0	1	NA	Inf	FALSE	Hispanic or Latino	YES	60	Female	FALSE	TRUE	FALSE	FALSE	TRUE	F	0.742	non-black
1057	OUTPATIENT	High	Final result	1.23	4510-04-18	4510-04-18	Yes	CREATININE	1.23	1.05	4510-02-14	0	NA	NA	Inf	9	4510-02-14	8	#NAME?	0	6	4	FALSE	102	73	14	NA	2.19	0	0	0	1	0	1	NA	Inf	FALSE	Hispanic or Latino	YES	60	Female	FALSE	TRUE	FALSE	FALSE	TRUE	F	0.742	non-black
1058	OUTPATIENT	High	Final result	3.42	4510-05-19	4510-05-19	Yes	CREATININE	3.42	1.05	4510-02-14	0	NA	NA	Inf	9	4510-02-14	8	#NAME?	0	6	4	FALSE	102	73	14	NA	2.19	0	0	0	1	0	1	NA	Inf	FALSE	Hispanic or Latino	YES	60	Female	FALSE	TRUE	FALSE	FALSE	TRUE	F	0.742	non-black
1059	OUTPATIENT	High	Final result	1.31	4510-07-24	4510-07-24	Yes	CREATININE	1.31	1.05	4510-02-14	0	NA	NA	Inf	9	4510-02-14	8	#NAME?	0	6	4	FALSE	102	73	14	NA	2.19	0	0	0	1	0	1	NA	Inf	FALSE	Hispanic or Latino	YES	60	Female	FALSE	TRUE	FALSE	FALSE	TRUE	F	0.742	non-black
1060	OUTPATIENT	High	Final result	1.95	4510-08-12	4510-08-12	Yes	CREATININE	1.95	1.05	4510-02-14	0	NA	NA	Inf	9	4510-02-14	8	#NAME?	0	6	4	FALSE	102	73	14	NA	2.19	0	0	0	1	0	1	NA	Inf	FALSE	Hispanic or Latino	YES	60	Female	FALSE	TRUE	FALSE	FALSE	TRUE	F	0.742	non-black
1061	OUTPATIENT	High	Final result	1.65	4510-08-05	4510-08-05	Yes	CREATININE	1.65	1.05	4510-02-14	0	NA	NA	Inf	9	4510-02-14	8	#NAME?	0	6	4	FALSE	102	73	14	NA	2.19	0	0	0	1	0	1	NA	Inf	FALSE	Hispanic or Latino	YES	60	Female	FALSE	TRUE	FALSE	FALSE	TRUE	F	0.742	non-black
1062	OUTPATIENT	High	Final result	1.19	4510-07-21	4510-07-21	Yes	CREATININE	1.19	1.05	4510-02-14	0	NA	NA	Inf	9	4510-02-14	8	#NAME?	0	6	4	FALSE	102	73	14	NA	2.19	0	0	0	1	0	1	NA	Inf	FALSE	Hispanic or Latino	YES	60	Female	FALSE	TRUE	FALSE	FALSE	TRUE	F	0.742	non-black
1063	OUTPATIENT	High	Final result	1.44	4510-08-04	4510-08-04	Yes	CREATININE	1.44	1.05	4510-02-14	0	NA	NA	Inf	9	4510-02-14	8	#NAME?	0	6	4	FALSE	102	73	14	NA	2.19	0	0	0	1	0	1	NA	Inf	FALSE	Hispanic or Latino	YES	60	Female	FALSE	TRUE	FALSE	FALSE	TRUE	F	0.742	non-black
1064	OUTPATIENT	High	Final result	1.11	4510-04-19	4510-04-19	Yes	CREATININE	1.11	1.05	4510-02-14	0	NA	NA	Inf	9	4510-02-14	8	#NAME?	0	6	4	FALSE	102	73	14	NA	2.19	0	0	0	1	0	1	NA	Inf	FALSE	Hispanic or Latino	YES	60	Female	FALSE	TRUE	FALSE	FALSE	TRUE	F	0.742	non-black
1065	OUTPATIENT	High	Final result	3.89	4510-04-05	4510-04-05	Yes	CREATININE	3.89	1.05	4510-02-14	0	NA	NA	Inf	9	4510-02-14	8	#NAME?	0	6	4	FALSE	102	73	14	NA	2.19	0	0	0	1	0	1	NA	Inf	FALSE	Hispanic or Latino	YES	60	Female	FALSE	TRUE	FALSE	FALSE	TRUE	F	0.742	non-black
1066	OUTPATIENT	High	Final result	2.04	4510-05-02	4510-05-02	Yes	CREATININE	2.04	1.05	4510-02-14	0	NA	NA	Inf	9	4510-02-14	8	#NAME?	0	6	4	FALSE	102	73	14	NA	2.19	0	0	0	1	0	1	NA	Inf	FALSE	Hispanic or Latino	YES	60	Female	FALSE	TRUE	FALSE	FALSE	TRUE	F	0.742	non-black
1067	OUTPATIENT	High	Final result	1.24	4510-06-23	4510-06-23	Yes	CREATININE	1.24	1.05	4510-02-14	0	NA	NA	Inf	9	4510-02-14	8	#NAME?	0	6	4	FALSE	102	73	14	NA	2.19	0	0	0	1	0	1	NA	Inf	FALSE	Hispanic or Latino	YES	60	Female	FALSE	TRUE	FALSE	FALSE	TRUE	F	0.742	non-black
1068	OUTPATIENT	High	Final result	3.2	4510-04-25	4510-04-25	Yes	CREATININE	3.2	1.05	4510-02-14	0	NA	NA	Inf	9	4510-02-14	8	#NAME?	0	6	4	FALSE	102	73	14	NA	2.19	0	0	0	1	0	1	NA	Inf	FALSE	Hispanic or Latino	YES	60	Female	FALSE	TRUE	FALSE	FALSE	TRUE	F	0.742	non-black
1069	OUTPATIENT	High	Final result	3.07	4510-05-14	4510-05-14	Yes	CREATININE	3.07	1.05	4510-02-14	0	NA	NA	Inf	9	4510-02-14	8	#NAME?	0	6	4	FALSE	102	73	14	NA	2.19	0	0	0	1	0	1	NA	Inf	FALSE	Hispanic or Latino	YES	60	Female	FALSE	TRUE	FALSE	FALSE	TRUE	F	0.742	non-black
1070	OUTPATIENT	High	Final result	1.8	4510-08-21	4510-08-21	Yes	CREATININE	1.8	1.05	4510-02-14	0	NA	NA	Inf	9	4510-02-14	8	#NAME?	0	6	4	FALSE	102	73	14	NA	2.19	0	0	0	1	0	1	NA	Inf	FALSE	Hispanic or Latino	YES	60	Female	FALSE	TRUE	FALSE	FALSE	TRUE	F	0.742	non-black
1071	OUTPATIENT	*Unspecified	Final result	1.1	4510-07-10	4510-07-10	Yes	CREATININE	1.1	1.05	4510-02-14	0	NA	NA	Inf	9	4510-02-14	8	#NAME?	0	6	4	FALSE	102	73	14	NA	2.19	0	0	0	1	0	1	NA	Inf	FALSE	Hispanic or Latino	YES	60	Female	FALSE	TRUE	FALSE	FALSE	TRUE	F	0.742	non-black
1072	OUTPATIENT	*Unspecified	Final result	1.01	4510-07-05	4510-07-05	Yes	CREATININE	1.01	1.05	4510-02-14	0	NA	NA	Inf	9	4510-02-14	8	#NAME?	0	6	4	FALSE	102	73	14	NA	2.19	0	0	0	1	0	1	NA	Inf	FALSE	Hispanic or Latino	YES	60	Female	FALSE	TRUE	FALSE	FALSE	TRUE	F	0.742	non-black
1073	OUTPATIENT	High	Final result	1.53	4510-07-09	4510-07-09	Yes	CREATININE	1.53	1.05	4510-02-14	0	NA	NA	Inf	9	4510-02-14	8	#NAME?	0	6	4	FALSE	102	73	14	NA	2.19	0	0	0	1	0	1	NA	Inf	FALSE	Hispanic or Latino	YES	60	Female	FALSE	TRUE	FALSE	FALSE	TRUE	F	0.742	non-black
1074	OUTPATIENT	High	Final result	1.19	4510-07-08	4510-07-08	Yes	CREATININE	1.19	1.05	4510-02-14	0	NA	NA	Inf	9	4510-02-14	8	#NAME?	0	6	4	FALSE	102	73	14	NA	2.19	0	0	0	1	0	1	NA	Inf	FALSE	Hispanic or Latino	YES	60	Female	FALSE	TRUE	FALSE	FALSE	TRUE	F	0.742	non-black
1075	OUTPATIENT	High	Final result	1.36	4510-07-04	4510-07-04	Yes	CREATININE	1.36	1.05	4510-02-14	0	NA	NA	Inf	9	4510-02-14	8	#NAME?	0	6	4	FALSE	102	73	14	NA	2.19	0	0	0	1	0	1	NA	Inf	FALSE	Hispanic or Latino	YES	60	Female	FALSE	TRUE	FALSE	FALSE	TRUE	F	0.742	non-black
1076	OUTPATIENT	High	Final result	1.33	4510-07-06	4510-07-06	Yes	CREATININE	1.33	1.05	4510-02-14	0	NA	NA	Inf	9	4510-02-14	8	#NAME?	0	6	4	FALSE	102	73	14	NA	2.19	0	0	0	1	0	1	NA	Inf	FALSE	Hispanic or Latino	YES	60	Female	FALSE	TRUE	FALSE	FALSE	TRUE	F	0.742	non-black
1077	OUTPATIENT	High	Final result	1.12	4510-07-03	4510-07-03	Yes	CREATININE	1.12	1.05	4510-02-14	0	NA	NA	Inf	9	4510-02-14	8	#NAME?	0	6	4	FALSE	102	73	14	NA	2.19	0	0	0	1	0	1	NA	Inf	FALSE	Hispanic or Latino	YES	60	Female	FALSE	TRUE	FALSE	FALSE	TRUE	F	0.742	non-black
1078	OUTPATIENT	High	Final result	3.96	4510-04-15	4510-04-15	Yes	CREATININE	3.96	1.05	4510-02-14	0	NA	NA	Inf	9	4510-02-14	8	#NAME?	0	6	4	FALSE	102	73	14	NA	2.19	0	0	0	1	0	1	NA	Inf	FALSE	Hispanic or Latino	YES	60	Female	FALSE	TRUE	FALSE	FALSE	TRUE	F	0.742	non-black
1079	OUTPATIENT	High	Final result	3.89	4510-04-10	4510-04-10	Yes	CREATININE	3.89	1.05	4510-02-14	0	NA	NA	Inf	9	4510-02-14	8	#NAME?	0	6	4	FALSE	102	73	14	NA	2.19	0	0	0	1	0	1	NA	Inf	FALSE	Hispanic or Latino	YES	60	Female	FALSE	TRUE	FALSE	FALSE	TRUE	F	0.742	non-black
1080	OUTPATIENT	High	Final result	4.55	4510-04-03	4510-04-03	Yes	CREATININE	4.55	1.05	4510-02-14	0	NA	NA	Inf	9	4510-02-14	8	#NAME?	0	6	4	FALSE	102	73	14	NA	2.19	0	0	0	1	0	1	NA	Inf	FALSE	Hispanic or Latino	YES	60	Female	FALSE	TRUE	FALSE	FALSE	TRUE	F	0.742	non-black
1081	OUTPATIENT	High	Final result	2.33	4510-05-02	4510-05-02	Yes	CREATININE	2.33	1.05	4510-02-14	0	NA	NA	Inf	9	4510-02-14	8	#NAME?	0	6	4	FALSE	102	73	14	NA	2.19	0	0	0	1	0	1	NA	Inf	FALSE	Hispanic or Latino	YES	60	Female	FALSE	TRUE	FALSE	FALSE	TRUE	F	0.742	non-black
1082	OUTPATIENT	High	Final result	1.84	4510-05-02	4510-05-02	Yes	CREATININE	1.84	1.05	4510-02-14	0	NA	NA	Inf	9	4510-02-14	8	#NAME?	0	6	4	FALSE	102	73	14	NA	2.19	0	0	0	1	0	1	NA	Inf	FALSE	Hispanic or Latino	YES	60	Female	FALSE	TRUE	FALSE	FALSE	TRUE	F	0.742	non-black
1083	OUTPATIENT	High	Final result	1.11	4510-07-01	4510-07-01	Yes	CREATININE	1.11	1.05	4510-02-14	0	NA	NA	Inf	9	4510-02-14	8	#NAME?	0	6	4	FALSE	102	73	14	NA	2.19	0	0	0	1	0	1	NA	Inf	FALSE	Hispanic or Latino	YES	60	Female	FALSE	TRUE	FALSE	FALSE	TRUE	F	0.742	non-black
1084	OUTPATIENT	High	Final result	3.33	4510-05-17	4510-05-17	Yes	CREATININE	3.33	1.05	4510-02-14	0	NA	NA	Inf	9	4510-02-14	8	#NAME?	0	6	4	FALSE	102	73	14	NA	2.19	0	0	0	1	0	1	NA	Inf	FALSE	Hispanic or Latino	YES	60	Female	FALSE	TRUE	FALSE	FALSE	TRUE	F	0.742	non-black
1085	OUTPATIENT	High	Final result	3.62	4510-04-25	4510-04-25	Yes	CREATININE	3.62	1.05	4510-02-14	0	NA	NA	Inf	9	4510-02-14	8	#NAME?	0	6	4	FALSE	102	73	14	NA	2.19	0	0	0	1	0	1	NA	Inf	FALSE	Hispanic or Latino	YES	60	Female	FALSE	TRUE	FALSE	FALSE	TRUE	F	0.742	non-black
1086	OUTPATIENT	High	Final result	1.69	4510-06-08	4510-06-08	Yes	CREATININE	1.69	1.05	4510-02-14	0	NA	NA	Inf	9	4510-02-14	8	#NAME?	0	6	4	FALSE	102	73	14	NA	2.19	0	0	0	1	0	1	NA	Inf	FALSE	Hispanic or Latino	YES	60	Female	FALSE	TRUE	FALSE	FALSE	TRUE	F	0.742	non-black
1087	OUTPATIENT	High	Final result	2.45	4510-04-23	4510-04-23	Yes	CREATININE	2.45	1.05	4510-02-14	0	NA	NA	Inf	9	4510-02-14	8	#NAME?	0	6	4	FALSE	102	73	14	NA	2.19	0	0	0	1	0	1	NA	Inf	FALSE	Hispanic or Latino	YES	60	Female	FALSE	TRUE	FALSE	FALSE	TRUE	F	0.742	non-black
1088	OUTPATIENT	High	Final result	2.9	4510-05-01	4510-05-01	Yes	CREATININE	2.9	1.05	4510-02-14	0	NA	NA	Inf	9	4510-02-14	8	#NAME?	0	6	4	FALSE	102	73	14	NA	2.19	0	0	0	1	0	1	NA	Inf	FALSE	Hispanic or Latino	YES	60	Female	FALSE	TRUE	FALSE	FALSE	TRUE	F	0.742	non-black
1089	OUTPATIENT	High	Final result	4.76	4510-04-06	4510-04-06	Yes	CREATININE	4.76	1.05	4510-02-14	0	NA	NA	Inf	9	4510-02-14	8	#NAME?	0	6	4	FALSE	102	73	14	NA	2.19	0	0	0	1	0	1	NA	Inf	FALSE	Hispanic or Latino	YES	60	Female	FALSE	TRUE	FALSE	FALSE	TRUE	F	0.742	non-black
1090	OUTPATIENT	High	Final result	4.5	4510-05-24	4510-05-24	Yes	CREATININE	4.5	1.05	4510-02-14	0	NA	NA	Inf	9	4510-02-14	8	#NAME?	0	6	4	FALSE	102	73	14	NA	2.19	0	0	0	1	0	1	NA	Inf	FALSE	Hispanic or Latino	YES	60	Female	FALSE	TRUE	FALSE	FALSE	TRUE	F	0.742	non-black
1091	OUTPATIENT	High	Final result	3.58	4510-05-12	4510-05-12	Yes	CREATININE	3.58	1.05	4510-02-14	0	NA	NA	Inf	9	4510-02-14	8	#NAME?	0	6	4	FALSE	102	73	14	NA	2.19	0	0	0	1	0	1	NA	Inf	FALSE	Hispanic or Latino	YES	60	Female	FALSE	TRUE	FALSE	FALSE	TRUE	F	0.742	non-black
1092	OUTPATIENT	High	Final result	2.79	4510-04-24	4510-04-24	Yes	CREATININE	2.79	1.05	4510-02-14	0	NA	NA	Inf	9	4510-02-14	8	#NAME?	0	6	4	FALSE	102	73	14	NA	2.19	0	0	0	1	0	1	NA	Inf	FALSE	Hispanic or Latino	YES	60	Female	FALSE	TRUE	FALSE	FALSE	TRUE	F	0.742	non-black
1093	OUTPATIENT	High	Final result	1.53	4510-06-06	4510-06-06	Yes	CREATININE	1.53	1.05	4510-02-14	0	NA	NA	Inf	9	4510-02-14	8	#NAME?	0	6	4	FALSE	102	73	14	NA	2.19	0	0	0	1	0	1	NA	Inf	FALSE	Hispanic or Latino	YES	60	Female	FALSE	TRUE	FALSE	FALSE	TRUE	F	0.742	non-black
1094	OUTPATIENT	High	Final result	3.56	4510-04-30	4510-04-30	Yes	CREATININE	3.56	1.05	4510-02-14	0	NA	NA	Inf	9	4510-02-14	8	#NAME?	0	6	4	FALSE	102	73	14	NA	2.19	0	0	0	1	0	1	NA	Inf	FALSE	Hispanic or Latino	YES	60	Female	FALSE	TRUE	FALSE	FALSE	TRUE	F	0.742	non-black
1095	OUTPATIENT	High	Final result	3.79	4510-05-24	4510-05-24	Yes	CREATININE	3.79	1.05	4510-02-14	0	NA	NA	Inf	9	4510-02-14	8	#NAME?	0	6	4	FALSE	102	73	14	NA	2.19	0	0	0	1	0	1	NA	Inf	FALSE	Hispanic or Latino	YES	60	Female	FALSE	TRUE	FALSE	FALSE	TRUE	F	0.742	non-black
1096	OUTPATIENT	High	Final result	4.86	4510-04-11	4510-04-11	Yes	CREATININE	4.86	1.05	4510-02-14	0	NA	NA	Inf	9	4510-02-14	8	#NAME?	0	6	4	FALSE	102	73	14	NA	2.19	0	0	0	1	0	1	NA	Inf	FALSE	Hispanic or Latino	YES	60	Female	FALSE	TRUE	FALSE	FALSE	TRUE	F	0.742	non-black
1097	OUTPATIENT	High	Final result	1.19	4510-04-18	4510-04-19	Yes	CREATININE	1.19	1.05	4510-02-14	0	NA	NA	Inf	9	4510-02-14	8	#NAME?	0	6	4	FALSE	102	73	14	NA	2.19	0	0	0	1	0	1	NA	Inf	FALSE	Hispanic or Latino	YES	60	Female	FALSE	TRUE	FALSE	FALSE	TRUE	F	0.742	non-black
1098	OUTPATIENT	High	Final result	1.43	4510-04-18	4510-04-18	Yes	CREATININE	1.43	1.05	4510-02-14	0	NA	NA	Inf	9	4510-02-14	8	#NAME?	0	6	4	FALSE	102	73	14	NA	2.19	0	0	0	1	0	1	NA	Inf	FALSE	Hispanic or Latino	YES	60	Female	FALSE	TRUE	FALSE	FALSE	TRUE	F	0.742	non-black
1099	OUTPATIENT	High	Final result	1.75	4510-07-23	4510-07-23	Yes	CREATININE	1.75	1.05	4510-02-14	0	NA	NA	Inf	9	4510-02-14	8	#NAME?	0	6	4	FALSE	102	73	14	NA	2.19	0	0	0	1	0	1	NA	Inf	FALSE	Hispanic or Latino	YES	60	Female	FALSE	TRUE	FALSE	FALSE	TRUE	F	0.742	non-black
1100	OUTPATIENT	High	Final result	1.11	4510-07-27	4510-07-27	Yes	CREATININE	1.11	1.05	4510-02-14	0	NA	NA	Inf	9	4510-02-14	8	#NAME?	0	6	4	FALSE	102	73	14	NA	2.19	0	0	0	1	0	1	NA	Inf	FALSE	Hispanic or Latino	YES	60	Female	FALSE	TRUE	FALSE	FALSE	TRUE	F	0.742	non-black
1101	OUTPATIENT	*Unspecified	Final result	0.9	4510-07-19	4510-07-19	Yes	CREATININE	0.9	1.05	4510-02-14	0	NA	NA	Inf	9	4510-02-14	8	#NAME?	0	6	4	FALSE	102	73	14	NA	2.19	0	0	0	1	0	1	NA	Inf	FALSE	Hispanic or Latino	YES	60	Female	FALSE	TRUE	FALSE	FALSE	TRUE	F	0.742	non-black
1102	OUTPATIENT	High	Final result	1.62	4510-08-20	4510-08-20	Yes	CREATININE	1.62	1.05	4510-02-14	0	NA	NA	Inf	9	4510-02-14	8	#NAME?	0	6	4	FALSE	102	73	14	NA	2.19	0	0	0	1	0	1	NA	Inf	FALSE	Hispanic or Latino	YES	60	Female	FALSE	TRUE	FALSE	FALSE	TRUE	F	0.742	non-black
1103	OUTPATIENT	High	Final result	1.49	4510-08-19	4510-08-19	Yes	CREATININE	1.49	1.05	4510-02-14	0	NA	NA	Inf	9	4510-02-14	8	#NAME?	0	6	4	FALSE	102	73	14	NA	2.19	0	0	0	1	0	1	NA	Inf	FALSE	Hispanic or Latino	YES	60	Female	FALSE	TRUE	FALSE	FALSE	TRUE	F	0.742	non-black
1104	OUTPATIENT	High	Final result	1.83	4510-08-06	4510-08-06	Yes	CREATININE	1.83	1.05	4510-02-14	0	NA	NA	Inf	9	4510-02-14	8	#NAME?	0	6	4	FALSE	102	73	14	NA	2.19	0	0	0	1	0	1	NA	Inf	FALSE	Hispanic or Latino	YES	60	Female	FALSE	TRUE	FALSE	FALSE	TRUE	F	0.742	non-black
1105	OUTPATIENT	High	Final result	1.32	4510-07-18	4510-07-18	Yes	CREATININE	1.32	1.05	4510-02-14	0	NA	NA	Inf	9	4510-02-14	8	#NAME?	0	6	4	FALSE	102	73	14	NA	2.19	0	0	0	1	0	1	NA	Inf	FALSE	Hispanic or Latino	YES	60	Female	FALSE	TRUE	FALSE	FALSE	TRUE	F	0.742	non-black
1106	OUTPATIENT	*Unspecified	Final result	0.58	4510-07-31	4510-07-31	Yes	CREATININE	0.58	1.05	4510-02-14	0	NA	NA	Inf	9	4510-02-14	8	#NAME?	0	6	4	FALSE	102	73	14	NA	2.19	0	0	0	1	0	1	NA	Inf	FALSE	Hispanic or Latino	YES	60	Female	FALSE	TRUE	FALSE	FALSE	TRUE	F	0.742	non-black
1107	OUTPATIENT	*Unspecified	Final result	1.07	4510-07-20	4510-07-20	Yes	CREATININE	1.07	1.05	4510-02-14	0	NA	NA	Inf	9	4510-02-14	8	#NAME?	0	6	4	FALSE	102	73	14	NA	2.19	0	0	0	1	0	1	NA	Inf	FALSE	Hispanic or Latino	YES	60	Female	FALSE	TRUE	FALSE	FALSE	TRUE	F	0.742	non-black
1108	OUTPATIENT	*Unspecified	Final result	1.1	4510-08-03	4510-08-03	Yes	CREATININE	1.1	1.05	4510-02-14	0	NA	NA	Inf	9	4510-02-14	8	#NAME?	0	6	4	FALSE	102	73	14	NA	2.19	0	0	0	1	0	1	NA	Inf	FALSE	Hispanic or Latino	YES	60	Female	FALSE	TRUE	FALSE	FALSE	TRUE	F	0.742	non-black
1109	OUTPATIENT	*Unspecified	Final result	1.05	4510-07-17	4510-07-17	Yes	CREATININE	1.05	1.05	4510-02-14	0	NA	NA	Inf	9	4510-02-14	8	#NAME?	0	6	4	FALSE	102	73	14	NA	2.19	0	0	0	1	0	1	NA	Inf	FALSE	Hispanic or Latino	YES	60	Female	FALSE	TRUE	FALSE	FALSE	TRUE	F	0.742	non-black
1110	OUTPATIENT	*Unspecified	Final result	0.94	4510-08-03	4510-08-03	Yes	CREATININE	0.94	1.05	4510-02-14	0	NA	NA	Inf	9	4510-02-14	8	#NAME?	0	6	4	FALSE	102	73	14	NA	2.19	0	0	0	1	0	1	NA	Inf	FALSE	Hispanic or Latino	YES	60	Female	FALSE	TRUE	FALSE	FALSE	TRUE	F	0.742	non-black
1111	OUTPATIENT	High	Final result	1.52	4510-08-17	4510-08-17	Yes	CREATININE	1.52	1.05	4510-02-14	0	NA	NA	Inf	9	4510-02-14	8	#NAME?	0	6	4	FALSE	102	73	14	NA	2.19	0	0	0	1	0	1	NA	Inf	FALSE	Hispanic or Latino	YES	60	Female	FALSE	TRUE	FALSE	FALSE	TRUE	F	0.742	non-black
1112	OUTPATIENT	High	Final result	1.79	4510-08-10	4510-08-10	Yes	CREATININE	1.79	1.05	4510-02-14	0	NA	NA	Inf	9	4510-02-14	8	#NAME?	0	6	4	FALSE	102	73	14	NA	2.19	0	0	0	1	0	1	NA	Inf	FALSE	Hispanic or Latino	YES	60	Female	FALSE	TRUE	FALSE	FALSE	TRUE	F	0.742	non-black
1113	OUTPATIENT	*Unspecified	Final result	1.05	4510-02-08	4510-02-08	Yes	CREATININE	1.05	1.01859	4510-02-08	0	NA	NA	Inf	6	4510-02-08	2	1	0	0	0	FALSE	NA	24	1.4	NA	1.05	0	0	0	0	0	1	NA	Inf	FALSE	Hispanic or Latino	NEVER	79	Male	FALSE	TRUE	FALSE	FALSE	TRUE	M	1	non-black
1114	OUTPATIENT	*Unspecified	Final result	1	4510-03-12	4510-03-12	Yes	CREATININE	1	1.01859	4510-02-08	0	NA	NA	Inf	6	4510-02-08	2	1	0	0	0	FALSE	NA	24	1.4	NA	1.05	0	0	0	0	0	1	NA	Inf	FALSE	Hispanic or Latino	NEVER	79	Male	FALSE	TRUE	FALSE	FALSE	TRUE	M	1	non-black
1115	OUTPATIENT	*Unspecified	Final result	0.96	4510-02-11	4510-02-11	Yes	CREATININE	0.96	1.01859	4510-02-08	0	NA	NA	Inf	6	4510-02-08	2	1	0	0	0	FALSE	NA	24	1.4	NA	1.05	0	0	0	0	0	1	NA	Inf	FALSE	Hispanic or Latino	NEVER	79	Male	FALSE	TRUE	FALSE	FALSE	TRUE	M	1	non-black
1116	OUTPATIENT	*Unspecified	Final result	1.04	4510-02-11	4510-02-11	Yes	CREATININE	1.04	1.01859	4510-02-08	0	NA	NA	Inf	6	4510-02-08	2	1	0	0	0	FALSE	NA	24	1.4	NA	1.05	0	0	0	0	0	1	NA	Inf	FALSE	Hispanic or Latino	NEVER	79	Male	FALSE	TRUE	FALSE	FALSE	TRUE	M	1	non-black
1117	OUTPATIENT	*Unspecified	Final result	1.04	4510-02-10	4510-02-10	Yes	CREATININE	1.04	1.01859	4510-02-08	0	NA	NA	Inf	6	4510-02-08	2	1	0	0	0	FALSE	NA	24	1.4	NA	1.05	0	0	0	0	0	1	NA	Inf	FALSE	Hispanic or Latino	NEVER	79	Male	FALSE	TRUE	FALSE	FALSE	TRUE	M	1	non-black
1118	OUTPATIENT	*Unspecified	Final result	1.04	4510-02-09	4510-02-09	Yes	CREATININE	1.04	1.01859	4510-02-08	0	NA	NA	Inf	6	4510-02-08	2	1	0	0	0	FALSE	NA	24	1.4	NA	1.05	0	0	0	0	0	1	NA	Inf	FALSE	Hispanic or Latino	NEVER	79	Male	FALSE	TRUE	FALSE	FALSE	TRUE	M	1	non-black
1119	OUTPATIENT	*Unspecified	Final result	1.2	4510-03-18	4510-03-18	Yes	CREATININE	1.2	1.01859	4510-02-08	0	NA	NA	Inf	6	4510-02-08	2	1	0	0	0	FALSE	NA	24	1.4	NA	1.05	0	0	0	0	0	1	NA	Inf	FALSE	Hispanic or Latino	NEVER	79	Male	FALSE	TRUE	FALSE	FALSE	TRUE	M	1	non-black
1120	OUTPATIENT	*Unspecified	Final result	1	4510-03-15	4510-03-15	Yes	CREATININE	1	1.01859	4510-02-08	0	NA	NA	Inf	6	4510-02-08	2	1	0	0	0	FALSE	NA	24	1.4	NA	1.05	0	0	0	0	0	1	NA	Inf	FALSE	Hispanic or Latino	NEVER	79	Male	FALSE	TRUE	FALSE	FALSE	TRUE	M	1	non-black
1121	OUTPATIENT	High	Final result	1.4	4510-03-17	4510-03-17	Yes	CREATININE	1.4	1.01859	4510-02-08	0	NA	NA	Inf	6	4510-02-08	2	1	0	0	0	FALSE	NA	24	1.4	NA	1.05	0	0	0	0	0	1	NA	Inf	FALSE	Hispanic or Latino	NEVER	79	Male	FALSE	TRUE	FALSE	FALSE	TRUE	M	1	non-black
1122	OUTPATIENT	*Unspecified	Final result	1.2	4510-03-11	4510-03-11	Yes	CREATININE	1.2	1.01859	4510-02-08	0	NA	NA	Inf	6	4510-02-08	2	1	0	0	0	FALSE	NA	24	1.4	NA	1.05	0	0	0	0	0	1	NA	Inf	FALSE	Hispanic or Latino	NEVER	79	Male	FALSE	TRUE	FALSE	FALSE	TRUE	M	1	non-black
1123	OUTPATIENT	*Unspecified	Final result	1.2	4510-03-13	4510-03-13	Yes	CREATININE	1.2	1.01859	4510-02-08	0	NA	NA	Inf	6	4510-02-08	2	1	0	0	0	FALSE	NA	24	1.4	NA	1.05	0	0	0	0	0	1	NA	Inf	FALSE	Hispanic or Latino	NEVER	79	Male	FALSE	TRUE	FALSE	FALSE	TRUE	M	1	non-black
1124	OUTPATIENT	High	Final result	1.4	4510-03-11	4510-03-11	Yes	CREATININE	1.4	1.01859	4510-02-08	0	NA	NA	Inf	6	4510-02-08	2	1	0	0	0	FALSE	NA	24	1.4	NA	1.05	0	0	0	0	0	1	NA	Inf	FALSE	Hispanic or Latino	NEVER	79	Male	FALSE	TRUE	FALSE	FALSE	TRUE	M	1	non-black
1125	OUTPATIENT	*Unspecified	Final result	1	4510-03-20	4510-03-21	Yes	CREATININE	1	1.01859	4510-02-08	0	NA	NA	Inf	6	4510-02-08	2	1	0	0	0	FALSE	NA	24	1.4	NA	1.05	0	0	0	0	0	1	NA	Inf	FALSE	Hispanic or Latino	NEVER	79	Male	FALSE	TRUE	FALSE	FALSE	TRUE	M	1	non-black
1126	OUTPATIENT	*Unspecified	Final result	1.3	4510-03-17	4510-03-17	Yes	CREATININE	1.3	1.01859	4510-02-08	0	NA	NA	Inf	6	4510-02-08	2	1	0	0	0	FALSE	NA	24	1.4	NA	1.05	0	0	0	0	0	1	NA	Inf	FALSE	Hispanic or Latino	NEVER	79	Male	FALSE	TRUE	FALSE	FALSE	TRUE	M	1	non-black
1127	OUTPATIENT	*Unspecified	Final result	1	4510-03-14	4510-03-14	Yes	CREATININE	1	1.01859	4510-02-08	0	NA	NA	Inf	6	4510-02-08	2	1	0	0	0	FALSE	NA	24	1.4	NA	1.05	0	0	0	0	0	1	NA	Inf	FALSE	Hispanic or Latino	NEVER	79	Male	FALSE	TRUE	FALSE	FALSE	TRUE	M	1	non-black
1128	OUTPATIENT	*Unspecified	Final result	1	4510-03-19	4510-03-19	Yes	CREATININE	1	1.01859	4510-02-08	0	NA	NA	Inf	6	4510-02-08	2	1	0	0	0	FALSE	NA	24	1.4	NA	1.05	0	0	0	0	0	1	NA	Inf	FALSE	Hispanic or Latino	NEVER	79	Male	FALSE	TRUE	FALSE	FALSE	TRUE	M	1	non-black
1129	OUTPATIENT	*Unspecified	Final result	1	4510-03-16	4510-03-16	Yes	CREATININE	1	1.01859	4510-02-08	0	NA	NA	Inf	6	4510-02-08	2	1	0	0	0	FALSE	NA	24	1.4	NA	1.05	0	0	0	0	0	1	NA	Inf	FALSE	Hispanic or Latino	NEVER	79	Male	FALSE	TRUE	FALSE	FALSE	TRUE	M	1	non-black
1130	OUTPATIENT	*Unspecified	Final result	0.96	4510-05-15	4510-05-15	Yes	CREATININE	0.96	1.01859	4510-02-08	0	NA	NA	Inf	6	4510-02-08	2	1	0	0	0	FALSE	NA	24	1.4	NA	1.05	0	0	0	0	0	1	NA	Inf	FALSE	Hispanic or Latino	NEVER	79	Male	FALSE	TRUE	FALSE	FALSE	TRUE	M	1	non-black
1131	OUTPATIENT	*Unspecified	Final result	0.81	4510-05-13	4510-05-13	Yes	CREATININE	0.81	1.01859	4510-02-08	0	NA	NA	Inf	6	4510-02-08	2	1	0	0	0	FALSE	NA	24	1.4	NA	1.05	0	0	0	0	0	1	NA	Inf	FALSE	Hispanic or Latino	NEVER	79	Male	FALSE	TRUE	FALSE	FALSE	TRUE	M	1	non-black
1132	OUTPATIENT	*Unspecified	Final result	0.94	4510-05-13	4510-05-13	Yes	CREATININE	0.94	1.01859	4510-02-08	0	NA	NA	Inf	6	4510-02-08	2	1	0	0	0	FALSE	NA	24	1.4	NA	1.05	0	0	0	0	0	1	NA	Inf	FALSE	Hispanic or Latino	NEVER	79	Male	FALSE	TRUE	FALSE	FALSE	TRUE	M	1	non-black
1133	OUTPATIENT	*Unspecified	Final result	0.79	4510-05-14	4510-05-14	Yes	CREATININE	0.79	1.01859	4510-02-08	0	NA	NA	Inf	6	4510-02-08	2	1	0	0	0	FALSE	NA	24	1.4	NA	1.05	0	0	0	0	0	1	NA	Inf	FALSE	Hispanic or Latino	NEVER	79	Male	FALSE	TRUE	FALSE	FALSE	TRUE	M	1	non-black
1134	OUTPATIENT	*Unspecified	Final result	0.75	4510-05-29	4510-05-29	Yes	CREATININE	0.75	0.7	4510-04-08	0	NA	NA	Inf	16	4510-04-08	5	1	0	6	6	FALSE	51	20	1	NA	0.82	0	0	0	0	0	1	NA	Inf	FALSE	Hispanic or Latino	NEVER	55	Female	FALSE	FALSE	FALSE	FALSE	FALSE	F	0.742	non-black
1135	OUTPATIENT	High	Final result	1.33	4510-05-28	4510-05-28	Yes	CREATININE	1.33	0.7	4510-04-08	0	NA	NA	Inf	16	4510-04-08	5	1	0	6	6	FALSE	51	20	1	NA	0.82	0	0	0	0	0	1	NA	Inf	FALSE	Hispanic or Latino	NEVER	55	Female	FALSE	FALSE	FALSE	FALSE	FALSE	F	0.742	non-black
1136	OUTPATIENT	*Unspecified	Final result	0.81	4510-07-01	4510-07-01	Yes	CREATININE	0.81	0.7	4510-04-08	0	NA	NA	Inf	16	4510-04-08	5	1	0	6	6	FALSE	51	20	1	NA	0.82	0	0	0	0	0	1	NA	Inf	FALSE	Hispanic or Latino	NEVER	55	Female	FALSE	FALSE	FALSE	FALSE	FALSE	F	0.742	non-black
1137	OUTPATIENT	*Unspecified	Final result	0.68	4510-07-05	4510-07-05	Yes	CREATININE	0.68	0.7	4510-04-08	0	NA	NA	Inf	16	4510-04-08	5	1	0	6	6	FALSE	51	20	1	NA	0.82	0	0	0	0	0	1	NA	Inf	FALSE	Hispanic or Latino	NEVER	55	Female	FALSE	FALSE	FALSE	FALSE	FALSE	F	0.742	non-black
1138	OUTPATIENT	*Unspecified	Final result	1.07	4510-08-10	4510-08-10	Yes	CREATININE	1.07	0.7	4510-04-08	0	NA	NA	Inf	16	4510-04-08	5	1	0	6	6	FALSE	51	20	1	NA	0.82	0	0	0	0	0	1	NA	Inf	FALSE	Hispanic or Latino	NEVER	55	Female	FALSE	FALSE	FALSE	FALSE	FALSE	F	0.742	non-black
1139	OUTPATIENT	*Unspecified	Final result	0.68	4510-05-02	4510-05-02	Yes	CREATININE	0.68	0.7	4510-04-08	0	NA	NA	Inf	16	4510-04-08	5	1	0	6	6	FALSE	51	20	1	NA	0.82	0	0	0	0	0	1	NA	Inf	FALSE	Hispanic or Latino	NEVER	55	Female	FALSE	FALSE	FALSE	FALSE	FALSE	F	0.742	non-black
1140	OUTPATIENT	*Unspecified	Final result	0.8	4510-06-20	4510-06-20	Yes	CREATININE	0.8	0.7	4510-04-08	0	NA	NA	Inf	16	4510-04-08	5	1	0	6	6	FALSE	51	20	1	NA	0.82	0	0	0	0	0	1	NA	Inf	FALSE	Hispanic or Latino	NEVER	55	Female	FALSE	FALSE	FALSE	FALSE	FALSE	F	0.742	non-black
1141	OUTPATIENT	High	Final result	1.24	4510-08-22	4510-08-22	Yes	CREATININE	1.24	0.7	4510-04-08	0	NA	NA	Inf	16	4510-04-08	5	1	0	6	6	FALSE	51	20	1	NA	0.82	0	0	0	0	0	1	NA	Inf	FALSE	Hispanic or Latino	NEVER	55	Female	FALSE	FALSE	FALSE	FALSE	FALSE	F	0.742	non-black
1142	OUTPATIENT	*Unspecified	Final result	0.87	4510-08-09	4510-08-09	Yes	CREATININE	0.87	0.7	4510-04-08	0	NA	NA	Inf	16	4510-04-08	5	1	0	6	6	FALSE	51	20	1	NA	0.82	0	0	0	0	0	1	NA	Inf	FALSE	Hispanic or Latino	NEVER	55	Female	FALSE	FALSE	FALSE	FALSE	FALSE	F	0.742	non-black
1143	OUTPATIENT	*Unspecified	Final result	1.08	4510-08-01	4510-08-01	Yes	CREATININE	1.08	0.7	4510-04-08	0	NA	NA	Inf	16	4510-04-08	5	1	0	6	6	FALSE	51	20	1	NA	0.82	0	0	0	0	0	1	NA	Inf	FALSE	Hispanic or Latino	NEVER	55	Female	FALSE	FALSE	FALSE	FALSE	FALSE	F	0.742	non-black
1144	OUTPATIENT	*Unspecified	Final result	0.5	4510-05-14	4510-05-14	Yes	CREATININE	0.5	0.7	4510-04-08	0	NA	NA	Inf	16	4510-04-08	5	1	0	6	6	FALSE	51	20	1	NA	0.82	0	0	0	0	0	1	NA	Inf	FALSE	Hispanic or Latino	NEVER	55	Female	FALSE	FALSE	FALSE	FALSE	FALSE	F	0.742	non-black
1145	OUTPATIENT	High	Final result	2.17	4510-09-13	4510-09-13	Yes	CREATININE	2.17	0.7	4510-04-08	0	NA	NA	Inf	16	4510-04-08	5	1	0	6	6	FALSE	51	20	1	NA	0.82	0	0	0	0	0	1	NA	Inf	FALSE	Hispanic or Latino	NEVER	55	Female	FALSE	FALSE	FALSE	FALSE	FALSE	F	0.742	non-black
1146	OUTPATIENT	*Unspecified	Final result	0.88	4510-04-15	4510-04-15	Yes	CREATININE	0.88	0.7	4510-04-08	0	NA	NA	Inf	16	4510-04-08	5	1	0	6	6	FALSE	51	20	1	NA	0.82	0	0	0	0	0	1	NA	Inf	FALSE	Hispanic or Latino	NEVER	55	Female	FALSE	FALSE	FALSE	FALSE	FALSE	F	0.742	non-black
1147	OUTPATIENT	*Unspecified	Final result	0.9	4510-04-16	4510-04-16	Yes	CREATININE	0.9	0.7	4510-04-08	0	NA	NA	Inf	16	4510-04-08	5	1	0	6	6	FALSE	51	20	1	NA	0.82	0	0	0	0	0	1	NA	Inf	FALSE	Hispanic or Latino	NEVER	55	Female	FALSE	FALSE	FALSE	FALSE	FALSE	F	0.742	non-black
1148	OUTPATIENT	*Unspecified	Final result	0.78	4510-04-17	4510-04-17	Yes	CREATININE	0.78	0.7	4510-04-08	0	NA	NA	Inf	16	4510-04-08	5	1	0	6	6	FALSE	51	20	1	NA	0.82	0	0	0	0	0	1	NA	Inf	FALSE	Hispanic or Latino	NEVER	55	Female	FALSE	FALSE	FALSE	FALSE	FALSE	F	0.742	non-black
1149	OUTPATIENT	*Unspecified	Final result	0.78	4510-04-14	4510-04-14	Yes	CREATININE	0.78	0.7	4510-04-08	0	NA	NA	Inf	16	4510-04-08	5	1	0	6	6	FALSE	51	20	1	NA	0.82	0	0	0	0	0	1	NA	Inf	FALSE	Hispanic or Latino	NEVER	55	Female	FALSE	FALSE	FALSE	FALSE	FALSE	F	0.742	non-black
1150	OUTPATIENT	*Unspecified	Final result	0.88	4510-04-12	4510-04-12	Yes	CREATININE	0.88	0.7	4510-04-08	0	NA	NA	Inf	16	4510-04-08	5	1	0	6	6	FALSE	51	20	1	NA	0.82	0	0	0	0	0	1	NA	Inf	FALSE	Hispanic or Latino	NEVER	55	Female	FALSE	FALSE	FALSE	FALSE	FALSE	F	0.742	non-black
1151	OUTPATIENT	*Unspecified	Final result	0.84	4510-04-10	4510-04-10	Yes	CREATININE	0.84	0.7	4510-04-08	0	NA	NA	Inf	16	4510-04-08	5	1	0	6	6	FALSE	51	20	1	NA	0.82	0	0	0	0	0	1	NA	Inf	FALSE	Hispanic or Latino	NEVER	55	Female	FALSE	FALSE	FALSE	FALSE	FALSE	F	0.742	non-black
1152	OUTPATIENT	*Unspecified	Final result	0.87	4510-04-11	4510-04-11	Yes	CREATININE	0.87	0.7	4510-04-08	0	NA	NA	Inf	16	4510-04-08	5	1	0	6	6	FALSE	51	20	1	NA	0.82	0	0	0	0	0	1	NA	Inf	FALSE	Hispanic or Latino	NEVER	55	Female	FALSE	FALSE	FALSE	FALSE	FALSE	F	0.742	non-black
1153	OUTPATIENT	*Unspecified	Final result	0.82	4510-04-08	4510-04-08	Yes	CREATININE	0.82	0.7	4510-04-08	0	NA	NA	Inf	16	4510-04-08	5	1	0	6	6	FALSE	51	20	1	NA	0.82	0	0	0	0	0	1	NA	Inf	FALSE	Hispanic or Latino	NEVER	55	Female	FALSE	FALSE	FALSE	FALSE	FALSE	F	0.742	non-black
1154	OUTPATIENT	*Unspecified	Final result	0.89	4510-04-09	4510-04-09	Yes	CREATININE	0.89	0.7	4510-04-08	0	NA	NA	Inf	16	4510-04-08	5	1	0	6	6	FALSE	51	20	1	NA	0.82	0	0	0	0	0	1	NA	Inf	FALSE	Hispanic or Latino	NEVER	55	Female	FALSE	FALSE	FALSE	FALSE	FALSE	F	0.742	non-black
1155	OUTPATIENT	*Unspecified	Final result	0.78	4510-04-13	4510-04-13	Yes	CREATININE	0.78	0.7	4510-04-08	0	NA	NA	Inf	16	4510-04-08	5	1	0	6	6	FALSE	51	20	1	NA	0.82	0	0	0	0	0	1	NA	Inf	FALSE	Hispanic or Latino	NEVER	55	Female	FALSE	FALSE	FALSE	FALSE	FALSE	F	0.742	non-black
1156	OUTPATIENT	High	Final result	1.93	4510-09-16	4510-09-16	Yes	CREATININE	1.93	0.7	4510-04-08	0	NA	NA	Inf	16	4510-04-08	5	1	0	6	6	FALSE	51	20	1	NA	0.82	0	0	0	0	0	1	NA	Inf	FALSE	Hispanic or Latino	NEVER	55	Female	FALSE	FALSE	FALSE	FALSE	FALSE	F	0.742	non-black
1157	OUTPATIENT	High	Final result	1.23	4510-09-11	4510-09-11	Yes	CREATININE	1.23	0.7	4510-04-08	0	NA	NA	Inf	16	4510-04-08	5	1	0	6	6	FALSE	51	20	1	NA	0.82	0	0	0	0	0	1	NA	Inf	FALSE	Hispanic or Latino	NEVER	55	Female	FALSE	FALSE	FALSE	FALSE	FALSE	F	0.742	non-black
1158	OUTPATIENT	High	Final result	1.91	4510-09-12	4510-09-12	Yes	CREATININE	1.91	0.7	4510-04-08	0	NA	NA	Inf	16	4510-04-08	5	1	0	6	6	FALSE	51	20	1	NA	0.82	0	0	0	0	0	1	NA	Inf	FALSE	Hispanic or Latino	NEVER	55	Female	FALSE	FALSE	FALSE	FALSE	FALSE	F	0.742	non-black
1159	OUTPATIENT	*Unspecified	Final result	0.88	4510-09-05	4510-09-05	Yes	CREATININE	0.88	0.7	4510-04-08	0	NA	NA	Inf	16	4510-04-08	5	1	0	6	6	FALSE	51	20	1	NA	0.82	0	0	0	0	0	1	NA	Inf	FALSE	Hispanic or Latino	NEVER	55	Female	FALSE	FALSE	FALSE	FALSE	FALSE	F	0.742	non-black
1160	OUTPATIENT	High	Final result	1.63	4510-09-15	4510-09-15	Yes	CREATININE	1.63	0.7	4510-04-08	0	NA	NA	Inf	16	4510-04-08	5	1	0	6	6	FALSE	51	20	1	NA	0.82	0	0	0	0	0	1	NA	Inf	FALSE	Hispanic or Latino	NEVER	55	Female	FALSE	FALSE	FALSE	FALSE	FALSE	F	0.742	non-black
1161	OUTPATIENT	High	Final result	2.01	4510-09-16	4510-09-16	Yes	CREATININE	2.01	0.7	4510-04-08	0	NA	NA	Inf	16	4510-04-08	5	1	0	6	6	FALSE	51	20	1	NA	0.82	0	0	0	0	0	1	NA	Inf	FALSE	Hispanic or Latino	NEVER	55	Female	FALSE	FALSE	FALSE	FALSE	FALSE	F	0.742	non-black
1162	OUTPATIENT	High	Final result	2.06	4510-09-13	4510-09-13	Yes	CREATININE	2.06	0.7	4510-04-08	0	NA	NA	Inf	16	4510-04-08	5	1	0	6	6	FALSE	51	20	1	NA	0.82	0	0	0	0	0	1	NA	Inf	FALSE	Hispanic or Latino	NEVER	55	Female	FALSE	FALSE	FALSE	FALSE	FALSE	F	0.742	non-black
1163	OUTPATIENT	High	Final result	1.36	4510-09-11	4510-09-11	Yes	CREATININE	1.36	0.7	4510-04-08	0	NA	NA	Inf	16	4510-04-08	5	1	0	6	6	FALSE	51	20	1	NA	0.82	0	0	0	0	0	1	NA	Inf	FALSE	Hispanic or Latino	NEVER	55	Female	FALSE	FALSE	FALSE	FALSE	FALSE	F	0.742	non-black
1164	OUTPATIENT	*Unspecified	Final result	1.1	4510-09-07	4510-09-07	Yes	CREATININE	1.1	0.7	4510-04-08	0	NA	NA	Inf	16	4510-04-08	5	1	0	6	6	FALSE	51	20	1	NA	0.82	0	0	0	0	0	1	NA	Inf	FALSE	Hispanic or Latino	NEVER	55	Female	FALSE	FALSE	FALSE	FALSE	FALSE	F	0.742	non-black
1165	OUTPATIENT	High	Final result	1.27	4510-09-08	4510-09-08	Yes	CREATININE	1.27	0.7	4510-04-08	0	NA	NA	Inf	16	4510-04-08	5	1	0	6	6	FALSE	51	20	1	NA	0.82	0	0	0	0	0	1	NA	Inf	FALSE	Hispanic or Latino	NEVER	55	Female	FALSE	FALSE	FALSE	FALSE	FALSE	F	0.742	non-black
1166	OUTPATIENT	High	Final result	1.31	4510-09-11	4510-09-11	Yes	CREATININE	1.31	0.7	4510-04-08	0	NA	NA	Inf	16	4510-04-08	5	1	0	6	6	FALSE	51	20	1	NA	0.82	0	0	0	0	0	1	NA	Inf	FALSE	Hispanic or Latino	NEVER	55	Female	FALSE	FALSE	FALSE	FALSE	FALSE	F	0.742	non-black
1167	OUTPATIENT	High	Final result	1.23	4510-09-09	4510-09-09	Yes	CREATININE	1.23	0.7	4510-04-08	0	NA	NA	Inf	16	4510-04-08	5	1	0	6	6	FALSE	51	20	1	NA	0.82	0	0	0	0	0	1	NA	Inf	FALSE	Hispanic or Latino	NEVER	55	Female	FALSE	FALSE	FALSE	FALSE	FALSE	F	0.742	non-black
1168	OUTPATIENT	High	Final result	1.22	4510-09-10	4510-09-10	Yes	CREATININE	1.22	0.7	4510-04-08	0	NA	NA	Inf	16	4510-04-08	5	1	0	6	6	FALSE	51	20	1	NA	0.82	0	0	0	0	0	1	NA	Inf	FALSE	Hispanic or Latino	NEVER	55	Female	FALSE	FALSE	FALSE	FALSE	FALSE	F	0.742	non-black
1169	OUTPATIENT	High	Final result	2.06	4510-09-12	4510-09-13	Yes	CREATININE	2.06	0.7	4510-04-08	0	NA	NA	Inf	16	4510-04-08	5	1	0	6	6	FALSE	51	20	1	NA	0.82	0	0	0	0	0	1	NA	Inf	FALSE	Hispanic or Latino	NEVER	55	Female	FALSE	FALSE	FALSE	FALSE	FALSE	F	0.742	non-black
1170	OUTPATIENT	High	Final result	2.21	4510-09-16	4510-09-16	Yes	CREATININE	2.21	0.7	4510-04-08	0	NA	NA	Inf	16	4510-04-08	5	1	0	6	6	FALSE	51	20	1	NA	0.82	0	0	0	0	0	1	NA	Inf	FALSE	Hispanic or Latino	NEVER	55	Female	FALSE	FALSE	FALSE	FALSE	FALSE	F	0.742	non-black
1171	OUTPATIENT	High	Final result	1.14	4510-09-09	4510-09-09	Yes	CREATININE	1.14	0.7	4510-04-08	0	NA	NA	Inf	16	4510-04-08	5	1	0	6	6	FALSE	51	20	1	NA	0.82	0	0	0	0	0	1	NA	Inf	FALSE	Hispanic or Latino	NEVER	55	Female	FALSE	FALSE	FALSE	FALSE	FALSE	F	0.742	non-black
1172	OUTPATIENT	High	Final result	1.13	4510-09-09	4510-09-09	Yes	CREATININE	1.13	0.7	4510-04-08	0	NA	NA	Inf	16	4510-04-08	5	1	0	6	6	FALSE	51	20	1	NA	0.82	0	0	0	0	0	1	NA	Inf	FALSE	Hispanic or Latino	NEVER	55	Female	FALSE	FALSE	FALSE	FALSE	FALSE	F	0.742	non-black
1173	OUTPATIENT	High	Final result	1.3	4510-09-08	4510-09-08	Yes	CREATININE	1.3	0.7	4510-04-08	0	NA	NA	Inf	16	4510-04-08	5	1	0	6	6	FALSE	51	20	1	NA	0.82	0	0	0	0	0	1	NA	Inf	FALSE	Hispanic or Latino	NEVER	55	Female	FALSE	FALSE	FALSE	FALSE	FALSE	F	0.742	non-black
1174	OUTPATIENT	High	Final result	1.71	4510-09-12	4510-09-12	Yes	CREATININE	1.71	0.7	4510-04-08	0	NA	NA	Inf	16	4510-04-08	5	1	0	6	6	FALSE	51	20	1	NA	0.82	0	0	0	0	0	1	NA	Inf	FALSE	Hispanic or Latino	NEVER	55	Female	FALSE	FALSE	FALSE	FALSE	FALSE	F	0.742	non-black
1175	OUTPATIENT	High	Final result	1.84	4510-09-14	4510-09-14	Yes	CREATININE	1.84	0.7	4510-04-08	0	NA	NA	Inf	16	4510-04-08	5	1	0	6	6	FALSE	51	20	1	NA	0.82	0	0	0	0	0	1	NA	Inf	FALSE	Hispanic or Latino	NEVER	55	Female	FALSE	FALSE	FALSE	FALSE	FALSE	F	0.742	non-black
1176	OUTPATIENT	High	Final result	1.15	4510-09-10	4510-09-10	Yes	CREATININE	1.15	0.7	4510-04-08	0	NA	NA	Inf	16	4510-04-08	5	1	0	6	6	FALSE	51	20	1	NA	0.82	0	0	0	0	0	1	NA	Inf	FALSE	Hispanic or Latino	NEVER	55	Female	FALSE	FALSE	FALSE	FALSE	FALSE	F	0.742	non-black
1177	OUTPATIENT	High	Final result	1.49	4510-09-15	4510-09-15	Yes	CREATININE	1.49	0.7	4510-04-08	0	NA	NA	Inf	16	4510-04-08	5	1	0	6	6	FALSE	51	20	1	NA	0.82	0	0	0	0	0	1	NA	Inf	FALSE	Hispanic or Latino	NEVER	55	Female	FALSE	FALSE	FALSE	FALSE	FALSE	F	0.742	non-black
1178	OUTPATIENT	*Unspecified	Final result	1.05	4510-09-06	4510-09-06	Yes	CREATININE	1.05	0.7	4510-04-08	0	NA	NA	Inf	16	4510-04-08	5	1	0	6	6	FALSE	51	20	1	NA	0.82	0	0	0	0	0	1	NA	Inf	FALSE	Hispanic or Latino	NEVER	55	Female	FALSE	FALSE	FALSE	FALSE	FALSE	F	0.742	non-black
1179	OUTPATIENT	High	Final result	1.54	4510-09-15	4510-09-15	Yes	CREATININE	1.54	0.7	4510-04-08	0	NA	NA	Inf	16	4510-04-08	5	1	0	6	6	FALSE	51	20	1	NA	0.82	0	0	0	0	0	1	NA	Inf	FALSE	Hispanic or Latino	NEVER	55	Female	FALSE	FALSE	FALSE	FALSE	FALSE	F	0.742	non-black
1180	OUTPATIENT	High	Final result	2.46	4510-09-17	4510-09-17	Yes	CREATININE	2.46	0.7	4510-04-08	0	NA	NA	Inf	16	4510-04-08	5	1	0	6	6	FALSE	51	20	1	NA	0.82	0	0	0	0	0	1	NA	Inf	FALSE	Hispanic or Latino	NEVER	55	Female	FALSE	FALSE	FALSE	FALSE	FALSE	F	0.742	non-black
1181	OUTPATIENT	High	Final result	2.03	4510-09-13	4510-09-13	Yes	CREATININE	2.03	0.7	4510-04-08	0	NA	NA	Inf	16	4510-04-08	5	1	0	6	6	FALSE	51	20	1	NA	0.82	0	0	0	0	0	1	NA	Inf	FALSE	Hispanic or Latino	NEVER	55	Female	FALSE	FALSE	FALSE	FALSE	FALSE	F	0.742	non-black
1182	OUTPATIENT	*Unspecified	Final result	0.97	4510-09-05	4510-09-05	Yes	CREATININE	0.97	0.7	4510-04-08	0	NA	NA	Inf	16	4510-04-08	5	1	0	6	6	FALSE	51	20	1	NA	0.82	0	0	0	0	0	1	NA	Inf	FALSE	Hispanic or Latino	NEVER	55	Female	FALSE	FALSE	FALSE	FALSE	FALSE	F	0.742	non-black
1183	OUTPATIENT	High	Final result	1.31	4510-09-10	4510-09-10	Yes	CREATININE	1.31	0.7	4510-04-08	0	NA	NA	Inf	16	4510-04-08	5	1	0	6	6	FALSE	51	20	1	NA	0.82	0	0	0	0	0	1	NA	Inf	FALSE	Hispanic or Latino	NEVER	55	Female	FALSE	FALSE	FALSE	FALSE	FALSE	F	0.742	non-black
1184	OUTPATIENT	High	Final result	1.72	4510-09-14	4510-09-14	Yes	CREATININE	1.72	0.7	4510-04-08	0	NA	NA	Inf	16	4510-04-08	5	1	0	6	6	FALSE	51	20	1	NA	0.82	0	0	0	0	0	1	NA	Inf	FALSE	Hispanic or Latino	NEVER	55	Female	FALSE	FALSE	FALSE	FALSE	FALSE	F	0.742	non-black
1185	OUTPATIENT	*Unspecified	Final result	0.63	4510-05-10	4510-05-10	Yes	CREATININE	0.63	0.7	4510-04-08	0	NA	NA	Inf	16	4510-04-08	5	1	0	6	6	FALSE	51	20	1	NA	0.82	0	0	0	0	0	1	NA	Inf	FALSE	Hispanic or Latino	NEVER	55	Female	FALSE	FALSE	FALSE	FALSE	FALSE	F	0.742	non-black
1186	OUTPATIENT	*Unspecified	Final result	0.6	4510-05-12	4510-05-12	Yes	CREATININE	0.6	0.7	4510-04-08	0	NA	NA	Inf	16	4510-04-08	5	1	0	6	6	FALSE	51	20	1	NA	0.82	0	0	0	0	0	1	NA	Inf	FALSE	Hispanic or Latino	NEVER	55	Female	FALSE	FALSE	FALSE	FALSE	FALSE	F	0.742	non-black
1187	OUTPATIENT	*Unspecified	Final result	0.74	4510-05-12	4510-05-12	Yes	CREATININE	0.74	0.7	4510-04-08	0	NA	NA	Inf	16	4510-04-08	5	1	0	6	6	FALSE	51	20	1	NA	0.82	0	0	0	0	0	1	NA	Inf	FALSE	Hispanic or Latino	NEVER	55	Female	FALSE	FALSE	FALSE	FALSE	FALSE	F	0.742	non-black
1188	OUTPATIENT	*Unspecified	Final result	0.77	4510-05-21	4510-05-21	Yes	CREATININE	0.77	0.7	4510-04-08	0	NA	NA	Inf	16	4510-04-08	5	1	0	6	6	FALSE	51	20	1	NA	0.82	0	0	0	0	0	1	NA	Inf	FALSE	Hispanic or Latino	NEVER	55	Female	FALSE	FALSE	FALSE	FALSE	FALSE	F	0.742	non-black
1189	OUTPATIENT	*Unspecified	Final result	0.7	4510-05-17	4510-05-17	Yes	CREATININE	0.7	0.7	4510-04-08	0	NA	NA	Inf	16	4510-04-08	5	1	0	6	6	FALSE	51	20	1	NA	0.82	0	0	0	0	0	1	NA	Inf	FALSE	Hispanic or Latino	NEVER	55	Female	FALSE	FALSE	FALSE	FALSE	FALSE	F	0.742	non-black
1190	OUTPATIENT	*Unspecified	Final result	0.73	4510-05-10	4510-05-10	Yes	CREATININE	0.73	0.7	4510-04-08	0	NA	NA	Inf	16	4510-04-08	5	1	0	6	6	FALSE	51	20	1	NA	0.82	0	0	0	0	0	1	NA	Inf	FALSE	Hispanic or Latino	NEVER	55	Female	FALSE	FALSE	FALSE	FALSE	FALSE	F	0.742	non-black
1191	OUTPATIENT	*Unspecified	Final result	0.72	4510-05-08	4510-05-09	Yes	CREATININE	0.72	0.7	4510-04-08	0	NA	NA	Inf	16	4510-04-08	5	1	0	6	6	FALSE	51	20	1	NA	0.82	0	0	0	0	0	1	NA	Inf	FALSE	Hispanic or Latino	NEVER	55	Female	FALSE	FALSE	FALSE	FALSE	FALSE	F	0.742	non-black
1192	OUTPATIENT	*Unspecified	Final result	0.63	4510-05-13	4510-05-13	Yes	CREATININE	0.63	0.7	4510-04-08	0	NA	NA	Inf	16	4510-04-08	5	1	0	6	6	FALSE	51	20	1	NA	0.82	0	0	0	0	0	1	NA	Inf	FALSE	Hispanic or Latino	NEVER	55	Female	FALSE	FALSE	FALSE	FALSE	FALSE	F	0.742	non-black
1193	OUTPATIENT	*Unspecified	Final result	0.8	4510-05-19	4510-05-19	Yes	CREATININE	0.8	0.7	4510-04-08	0	NA	NA	Inf	16	4510-04-08	5	1	0	6	6	FALSE	51	20	1	NA	0.82	0	0	0	0	0	1	NA	Inf	FALSE	Hispanic or Latino	NEVER	55	Female	FALSE	FALSE	FALSE	FALSE	FALSE	F	0.742	non-black
1194	OUTPATIENT	*Unspecified	Final result	0.85	4510-05-09	4510-05-09	Yes	CREATININE	0.85	0.7	4510-04-08	0	NA	NA	Inf	16	4510-04-08	5	1	0	6	6	FALSE	51	20	1	NA	0.82	0	0	0	0	0	1	NA	Inf	FALSE	Hispanic or Latino	NEVER	55	Female	FALSE	FALSE	FALSE	FALSE	FALSE	F	0.742	non-black
1195	OUTPATIENT	*Unspecified	Final result	0.69	4510-05-15	4510-05-15	Yes	CREATININE	0.69	0.7	4510-04-08	0	NA	NA	Inf	16	4510-04-08	5	1	0	6	6	FALSE	51	20	1	NA	0.82	0	0	0	0	0	1	NA	Inf	FALSE	Hispanic or Latino	NEVER	55	Female	FALSE	FALSE	FALSE	FALSE	FALSE	F	0.742	non-black
1196	OUTPATIENT	*Unspecified	Final result	0.86	4510-05-20	4510-05-20	Yes	CREATININE	0.86	0.7	4510-04-08	0	NA	NA	Inf	16	4510-04-08	5	1	0	6	6	FALSE	51	20	1	NA	0.82	0	0	0	0	0	1	NA	Inf	FALSE	Hispanic or Latino	NEVER	55	Female	FALSE	FALSE	FALSE	FALSE	FALSE	F	0.742	non-black
1197	OUTPATIENT	*Unspecified	Final result	0.62	4510-05-11	4510-05-11	Yes	CREATININE	0.62	0.7	4510-04-08	0	NA	NA	Inf	16	4510-04-08	5	1	0	6	6	FALSE	51	20	1	NA	0.82	0	0	0	0	0	1	NA	Inf	FALSE	Hispanic or Latino	NEVER	55	Female	FALSE	FALSE	FALSE	FALSE	FALSE	F	0.742	non-black
1198	OUTPATIENT	*Unspecified	Final result	0.67	4510-05-18	4510-05-18	Yes	CREATININE	0.67	0.7	4510-04-08	0	NA	NA	Inf	16	4510-04-08	5	1	0	6	6	FALSE	51	20	1	NA	0.82	0	0	0	0	0	1	NA	Inf	FALSE	Hispanic or Latino	NEVER	55	Female	FALSE	FALSE	FALSE	FALSE	FALSE	F	0.742	non-black
1199	OUTPATIENT	*Unspecified	Final result	0.71	4510-05-11	4510-05-11	Yes	CREATININE	0.71	0.7	4510-04-08	0	NA	NA	Inf	16	4510-04-08	5	1	0	6	6	FALSE	51	20	1	NA	0.82	0	0	0	0	0	1	NA	Inf	FALSE	Hispanic or Latino	NEVER	55	Female	FALSE	FALSE	FALSE	FALSE	FALSE	F	0.742	non-black
1200	OUTPATIENT	*Unspecified	Final result	1.18	4510-02-15	4510-02-15	Yes	CREATININE	1.18	1.12026	4510-02-14	0	NA	NA	Inf	6	4510-02-14	4	1	3	12	11	FALSE	152	12	NA	NA	1.15	0	0	0	0	0	1	NA	Inf	FALSE	NOT Hispanic or Latino	NEVER	46	Male	FALSE	FALSE	FALSE	TRUE	FALSE	M	1	non-black
1201	OUTPATIENT	*Unspecified	Final result	1.15	4510-02-14	4510-02-14	Yes	CREATININE	1.15	1.12026	4510-02-14	0	NA	NA	Inf	6	4510-02-14	4	1	3	12	11	FALSE	152	12	NA	NA	1.15	0	0	0	0	0	1	NA	Inf	FALSE	NOT Hispanic or Latino	NEVER	46	Male	FALSE	FALSE	FALSE	TRUE	FALSE	M	1	non-black
1202	OUTPATIENT	*Unspecified	Final result	1.25	4510-06-21	4510-06-21	Yes	CREATININE	1.25	1.12026	4510-02-14	0	NA	NA	Inf	6	4510-02-14	4	1	3	12	11	FALSE	152	12	NA	NA	1.15	0	0	0	0	0	1	NA	Inf	FALSE	NOT Hispanic or Latino	NEVER	46	Male	FALSE	FALSE	FALSE	TRUE	FALSE	M	1	non-black
1203	OUTPATIENT	High	Final result	1.41	4510-03-27	4510-03-27	Yes	CREATININE	1.41	1.12026	4510-02-14	0	NA	NA	Inf	6	4510-02-14	4	1	3	12	11	FALSE	152	12	NA	NA	1.15	0	0	0	0	0	1	NA	Inf	FALSE	NOT Hispanic or Latino	NEVER	46	Male	FALSE	FALSE	FALSE	TRUE	FALSE	M	1	non-black
1204	OUTPATIENT	*Unspecified	Final result	1.3	4510-04-11	4510-04-11	Yes	CREATININE	1.3	1.12026	4510-02-14	0	NA	NA	Inf	6	4510-02-14	4	1	3	12	11	FALSE	152	12	NA	NA	1.15	0	0	0	0	0	1	NA	Inf	FALSE	NOT Hispanic or Latino	NEVER	46	Male	FALSE	FALSE	FALSE	TRUE	FALSE	M	1	non-black
1205	OUTPATIENT	*Unspecified	Final result	1.05	4510-03-03	4510-03-04	Yes	CREATININE	1.05	1.12026	4510-02-14	0	NA	NA	Inf	6	4510-02-14	4	1	3	12	11	FALSE	152	12	NA	NA	1.15	0	0	0	0	0	1	NA	Inf	FALSE	NOT Hispanic or Latino	NEVER	46	Male	FALSE	FALSE	FALSE	TRUE	FALSE	M	1	non-black
1206	OUTPATIENT	*Unspecified	Final result	1.08	4510-03-10	4510-03-10	Yes	CREATININE	1.08	1.12026	4510-02-14	0	NA	NA	Inf	6	4510-02-14	4	1	3	12	11	FALSE	152	12	NA	NA	1.15	0	0	0	0	0	1	NA	Inf	FALSE	NOT Hispanic or Latino	NEVER	46	Male	FALSE	FALSE	FALSE	TRUE	FALSE	M	1	non-black
1207	OUTPATIENT	*Unspecified	Final result	1.29	4510-03-06	4510-03-06	Yes	CREATININE	1.29	1.12026	4510-02-14	0	NA	NA	Inf	6	4510-02-14	4	1	3	12	11	FALSE	152	12	NA	NA	1.15	0	0	0	0	0	1	NA	Inf	FALSE	NOT Hispanic or Latino	NEVER	46	Male	FALSE	FALSE	FALSE	TRUE	FALSE	M	1	non-black
1208	OUTPATIENT	High	Final result	1.46	4510-03-05	4510-03-05	Yes	CREATININE	1.46	1.12026	4510-02-14	0	NA	NA	Inf	6	4510-02-14	4	1	3	12	11	FALSE	152	12	NA	NA	1.15	0	0	0	0	0	1	NA	Inf	FALSE	NOT Hispanic or Latino	NEVER	46	Male	FALSE	FALSE	FALSE	TRUE	FALSE	M	1	non-black
1209	OUTPATIENT	High	Final result	1.37	4510-03-07	4510-03-07	Yes	CREATININE	1.37	1.12026	4510-02-14	0	NA	NA	Inf	6	4510-02-14	4	1	3	12	11	FALSE	152	12	NA	NA	1.15	0	0	0	0	0	1	NA	Inf	FALSE	NOT Hispanic or Latino	NEVER	46	Male	FALSE	FALSE	FALSE	TRUE	FALSE	M	1	non-black
1210	OUTPATIENT	*Unspecified	Final result	1.05	4510-03-14	4510-03-14	Yes	CREATININE	1.05	1.12026	4510-02-14	0	NA	NA	Inf	6	4510-02-14	4	1	3	12	11	FALSE	152	12	NA	NA	1.15	0	0	0	0	0	1	NA	Inf	FALSE	NOT Hispanic or Latino	NEVER	46	Male	FALSE	FALSE	FALSE	TRUE	FALSE	M	1	non-black
1211	OUTPATIENT	*Unspecified	Final result	1.24	4510-03-09	4510-03-09	Yes	CREATININE	1.24	1.12026	4510-02-14	0	NA	NA	Inf	6	4510-02-14	4	1	3	12	11	FALSE	152	12	NA	NA	1.15	0	0	0	0	0	1	NA	Inf	FALSE	NOT Hispanic or Latino	NEVER	46	Male	FALSE	FALSE	FALSE	TRUE	FALSE	M	1	non-black
1212	OUTPATIENT	*Unspecified	Final result	1.27	4510-03-07	4510-03-07	Yes	CREATININE	1.27	1.12026	4510-02-14	0	NA	NA	Inf	6	4510-02-14	4	1	3	12	11	FALSE	152	12	NA	NA	1.15	0	0	0	0	0	1	NA	Inf	FALSE	NOT Hispanic or Latino	NEVER	46	Male	FALSE	FALSE	FALSE	TRUE	FALSE	M	1	non-black
1213	OUTPATIENT	*Unspecified	Final result	1.28	4510-03-08	4510-03-08	Yes	CREATININE	1.28	1.12026	4510-02-14	0	NA	NA	Inf	6	4510-02-14	4	1	3	12	11	FALSE	152	12	NA	NA	1.15	0	0	0	0	0	1	NA	Inf	FALSE	NOT Hispanic or Latino	NEVER	46	Male	FALSE	FALSE	FALSE	TRUE	FALSE	M	1	non-black
1214	OUTPATIENT	*Unspecified	Final result	1.07	4510-03-11	4510-03-11	Yes	CREATININE	1.07	1.12026	4510-02-14	0	NA	NA	Inf	6	4510-02-14	4	1	3	12	11	FALSE	152	12	NA	NA	1.15	0	0	0	0	0	1	NA	Inf	FALSE	NOT Hispanic or Latino	NEVER	46	Male	FALSE	FALSE	FALSE	TRUE	FALSE	M	1	non-black
1215	OUTPATIENT	*Unspecified	Final result	1.06	4510-03-13	4510-03-13	Yes	CREATININE	1.06	1.12026	4510-02-14	0	NA	NA	Inf	6	4510-02-14	4	1	3	12	11	FALSE	152	12	NA	NA	1.15	0	0	0	0	0	1	NA	Inf	FALSE	NOT Hispanic or Latino	NEVER	46	Male	FALSE	FALSE	FALSE	TRUE	FALSE	M	1	non-black
1216	OUTPATIENT	*Unspecified	Final result	1.09	4510-03-05	4510-03-05	Yes	CREATININE	1.09	1.12026	4510-02-14	0	NA	NA	Inf	6	4510-02-14	4	1	3	12	11	FALSE	152	12	NA	NA	1.15	0	0	0	0	0	1	NA	Inf	FALSE	NOT Hispanic or Latino	NEVER	46	Male	FALSE	FALSE	FALSE	TRUE	FALSE	M	1	non-black
1217	OUTPATIENT	*Unspecified	Final result	1.28	4510-03-06	4510-03-06	Yes	CREATININE	1.28	1.12026	4510-02-14	0	NA	NA	Inf	6	4510-02-14	4	1	3	12	11	FALSE	152	12	NA	NA	1.15	0	0	0	0	0	1	NA	Inf	FALSE	NOT Hispanic or Latino	NEVER	46	Male	FALSE	FALSE	FALSE	TRUE	FALSE	M	1	non-black
1218	OUTPATIENT	*Unspecified	Final result	1.1	4510-03-12	4510-03-12	Yes	CREATININE	1.1	1.12026	4510-02-14	0	NA	NA	Inf	6	4510-02-14	4	1	3	12	11	FALSE	152	12	NA	NA	1.15	0	0	0	0	0	1	NA	Inf	FALSE	NOT Hispanic or Latino	NEVER	46	Male	FALSE	FALSE	FALSE	TRUE	FALSE	M	1	non-black
1219	OUTPATIENT	*Unspecified	Final result	1.23	4510-05-23	4510-05-23	Yes	CREATININE	1.23	1.12026	4510-02-14	0	NA	NA	Inf	6	4510-02-14	4	1	3	12	11	FALSE	152	12	NA	NA	1.15	0	0	0	0	0	1	NA	Inf	FALSE	NOT Hispanic or Latino	NEVER	46	Male	FALSE	FALSE	FALSE	TRUE	FALSE	M	1	non-black
1220	OUTPATIENT	*Unspecified	Final result	1.09	4511-03-20	4511-03-20	Yes	CREATININE	1.09	1.12026	4510-02-14	0	NA	NA	Inf	6	4510-02-14	4	1	3	12	11	FALSE	152	12	NA	NA	1.15	0	0	0	0	0	1	NA	Inf	FALSE	NOT Hispanic or Latino	NEVER	46	Male	FALSE	FALSE	FALSE	TRUE	FALSE	M	1	non-black
1221	OUTPATIENT	*Unspecified	Final result	1.02	4511-03-06	4511-03-06	Yes	CREATININE	1.02	1.12026	4510-02-14	0	NA	NA	Inf	6	4510-02-14	4	1	3	12	11	FALSE	152	12	NA	NA	1.15	0	0	0	0	0	1	NA	Inf	FALSE	NOT Hispanic or Latino	NEVER	46	Male	FALSE	FALSE	FALSE	TRUE	FALSE	M	1	non-black
1222	OUTPATIENT	*Unspecified	Final result	1.11	4510-10-31	4510-10-31	Yes	CREATININE	1.11	1.12026	4510-02-14	0	NA	NA	Inf	6	4510-02-14	4	1	3	12	11	FALSE	152	12	NA	NA	1.15	0	0	0	0	0	1	NA	Inf	FALSE	NOT Hispanic or Latino	NEVER	46	Male	FALSE	FALSE	FALSE	TRUE	FALSE	M	1	non-black
1223	OUTPATIENT	High	Final result	1.21	4510-04-19	4510-04-19	Yes	CREATININE	1.21	0.68	4510-02-13	1	4510-02-11	4510-02-11	Inf	5	4510-02-13	2	1	0	3	3	FALSE	97	19	0.9	NA	1.16	1	0	0	0	0	1	NA	-2	FALSE	Hispanic or Latino	NEVER	77	Female	TRUE	TRUE	FALSE	TRUE	TRUE	F	0.742	non-black
1224	OUTPATIENT	*Unspecified	Final result	1.08	4510-04-19	4510-04-19	Yes	CREATININE	1.08	0.68	4510-02-13	1	4510-02-11	4510-02-11	Inf	5	4510-02-13	2	1	0	3	3	FALSE	97	19	0.9	NA	1.16	1	0	0	0	0	1	NA	-2	FALSE	Hispanic or Latino	NEVER	77	Female	TRUE	TRUE	FALSE	TRUE	TRUE	F	0.742	non-black
1225	OUTPATIENT	*Unspecified	Final result	1.08	4510-04-20	4510-04-20	Yes	CREATININE	1.08	0.68	4510-02-13	1	4510-02-11	4510-02-11	Inf	5	4510-02-13	2	1	0	3	3	FALSE	97	19	0.9	NA	1.16	1	0	0	0	0	1	NA	-2	FALSE	Hispanic or Latino	NEVER	77	Female	TRUE	TRUE	FALSE	TRUE	TRUE	F	0.742	non-black
1226	OUTPATIENT	High	Final result	1.49	4510-04-22	4510-04-22	Yes	CREATININE	1.49	0.68	4510-02-13	1	4510-02-11	4510-02-11	Inf	5	4510-02-13	2	1	0	3	3	FALSE	97	19	0.9	NA	1.16	1	0	0	0	0	1	NA	-2	FALSE	Hispanic or Latino	NEVER	77	Female	TRUE	TRUE	FALSE	TRUE	TRUE	F	0.742	non-black
1227	OUTPATIENT	High	Final result	1.35	4510-04-21	4510-04-21	Yes	CREATININE	1.35	0.68	4510-02-13	1	4510-02-11	4510-02-11	Inf	5	4510-02-13	2	1	0	3	3	FALSE	97	19	0.9	NA	1.16	1	0	0	0	0	1	NA	-2	FALSE	Hispanic or Latino	NEVER	77	Female	TRUE	TRUE	FALSE	TRUE	TRUE	F	0.742	non-black
1228	OUTPATIENT	*Unspecified	Final result	1.09	4510-07-27	4510-07-27	Yes	CREATININE	1.09	0.9	4510-01-18	0	NA	NA	Inf	22	4510-01-18	15	1	1	0	0	FALSE	788	NA	NA	NA	NA	0	0	0	0	1.21883e+08	8.08594	4510-01-03	Inf	FALSE	NOT Hispanic or Latino	QUIT	66	Male	FALSE	TRUE	FALSE	FALSE	FALSE	M	1	non-black
1229	OUTPATIENT	High	Final result	1.36	4510-07-02	4510-07-03	Yes	CREATININE	1.36	0.9	4510-01-18	0	NA	NA	Inf	22	4510-01-18	15	1	1	0	0	FALSE	788	NA	NA	NA	NA	0	0	0	0	1.21883e+08	8.08594	4510-01-03	Inf	FALSE	NOT Hispanic or Latino	QUIT	66	Male	FALSE	TRUE	FALSE	FALSE	FALSE	M	1	non-black
1230	OUTPATIENT	*Unspecified	Final result	1.08	4510-04-23	4510-04-24	Yes	CREATININE	1.08	0.9	4510-01-18	0	NA	NA	Inf	22	4510-01-18	15	1	1	0	0	FALSE	788	NA	NA	NA	NA	0	0	0	0	1.21883e+08	8.08594	4510-01-03	Inf	FALSE	NOT Hispanic or Latino	QUIT	66	Male	FALSE	TRUE	FALSE	FALSE	FALSE	M	1	non-black
1231	OUTPATIENT	*Unspecified	Final result	1.16	4510-03-06	4510-03-07	Yes	CREATININE	1.16	0.9	4510-01-18	0	NA	NA	Inf	22	4510-01-18	15	1	1	0	0	FALSE	788	NA	NA	NA	NA	0	0	0	0	1.21883e+08	8.08594	4510-01-03	Inf	FALSE	NOT Hispanic or Latino	QUIT	66	Male	FALSE	TRUE	FALSE	FALSE	FALSE	M	1	non-black
1232	OUTPATIENT	*Unspecified	Final result	1.3	4510-07-17	4510-07-17	Yes	CREATININE	1.3	0.9	4510-01-18	0	NA	NA	Inf	22	4510-01-18	15	1	1	0	0	FALSE	788	NA	NA	NA	NA	0	0	0	0	1.21883e+08	8.08594	4510-01-03	Inf	FALSE	NOT Hispanic or Latino	QUIT	66	Male	FALSE	TRUE	FALSE	FALSE	FALSE	M	1	non-black
1233	OUTPATIENT	*Unspecified	Final result	1.03	4510-01-23	4510-01-23	Yes	CREATININE	1.03	0.9	4510-01-18	0	NA	NA	Inf	22	4510-01-18	15	1	1	0	0	FALSE	788	NA	NA	NA	NA	0	0	0	0	1.21883e+08	8.08594	4510-01-03	Inf	FALSE	NOT Hispanic or Latino	QUIT	66	Male	FALSE	TRUE	FALSE	FALSE	FALSE	M	1	non-black
1234	OUTPATIENT	*Unspecified	Final result	1.14	4511-06-15	4511-06-15	Yes	CREATININE	1.14	0.9	4510-01-18	0	NA	NA	Inf	22	4510-01-18	15	1	1	0	0	FALSE	788	NA	NA	NA	NA	0	0	0	0	1.21883e+08	8.08594	4510-01-03	Inf	FALSE	NOT Hispanic or Latino	QUIT	66	Male	FALSE	TRUE	FALSE	FALSE	FALSE	M	1	non-black
1235	OUTPATIENT	*Unspecified	Final result	1.03	4510-07-18	4510-07-18	Yes	CREATININE	1.03	0.9	4510-01-18	0	NA	NA	Inf	22	4510-01-18	15	1	1	0	0	FALSE	788	NA	NA	NA	NA	0	0	0	0	1.21883e+08	8.08594	4510-01-03	Inf	FALSE	NOT Hispanic or Latino	QUIT	66	Male	FALSE	TRUE	FALSE	FALSE	FALSE	M	1	non-black
1236	OUTPATIENT	*Unspecified	Final result	1.28	4510-07-16	4510-07-16	Yes	CREATININE	1.28	0.9	4510-01-18	0	NA	NA	Inf	22	4510-01-18	15	1	1	0	0	FALSE	788	NA	NA	NA	NA	0	0	0	0	1.21883e+08	8.08594	4510-01-03	Inf	FALSE	NOT Hispanic or Latino	QUIT	66	Male	FALSE	TRUE	FALSE	FALSE	FALSE	M	1	non-black
1237	OUTPATIENT	*Unspecified	Final result	1.18	4510-07-17	4510-07-17	Yes	CREATININE	1.18	0.9	4510-01-18	0	NA	NA	Inf	22	4510-01-18	15	1	1	0	0	FALSE	788	NA	NA	NA	NA	0	0	0	0	1.21883e+08	8.08594	4510-01-03	Inf	FALSE	NOT Hispanic or Latino	QUIT	66	Male	FALSE	TRUE	FALSE	FALSE	FALSE	M	1	non-black
1238	OUTPATIENT	*Unspecified	Final result	1.16	4510-07-16	4510-07-16	Yes	CREATININE	1.16	0.9	4510-01-18	0	NA	NA	Inf	22	4510-01-18	15	1	1	0	0	FALSE	788	NA	NA	NA	NA	0	0	0	0	1.21883e+08	8.08594	4510-01-03	Inf	FALSE	NOT Hispanic or Latino	QUIT	66	Male	FALSE	TRUE	FALSE	FALSE	FALSE	M	1	non-black
1239	OUTPATIENT	*Unspecified	Final result	0.98	4511-02-25	4511-02-25	Yes	CREATININE	0.98	0.9	4510-01-18	0	NA	NA	Inf	22	4510-01-18	15	1	1	0	0	FALSE	788	NA	NA	NA	NA	0	0	0	0	1.21883e+08	8.08594	4510-01-03	Inf	FALSE	NOT Hispanic or Latino	QUIT	66	Male	FALSE	TRUE	FALSE	FALSE	FALSE	M	1	non-black
1240	OUTPATIENT	*Unspecified	Final result	1.16	4511-01-28	4511-01-29	Yes	CREATININE	1.16	0.9	4510-01-18	0	NA	NA	Inf	22	4510-01-18	15	1	1	0	0	FALSE	788	NA	NA	NA	NA	0	0	0	0	1.21883e+08	8.08594	4510-01-03	Inf	FALSE	NOT Hispanic or Latino	QUIT	66	Male	FALSE	TRUE	FALSE	FALSE	FALSE	M	1	non-black
1241	OUTPATIENT	*Unspecified	Final result	1.14	4511-01-07	4511-01-07	Yes	CREATININE	1.14	0.9	4510-01-18	0	NA	NA	Inf	22	4510-01-18	15	1	1	0	0	FALSE	788	NA	NA	NA	NA	0	0	0	0	1.21883e+08	8.08594	4510-01-03	Inf	FALSE	NOT Hispanic or Latino	QUIT	66	Male	FALSE	TRUE	FALSE	FALSE	FALSE	M	1	non-black
1242	OUTPATIENT	*Unspecified	Final result	0.9	4510-04-02	4510-04-02	Yes	CREATININE	0.9	0.65	4510-01-07	0	NA	NA	Inf	2	4510-01-07	1	1	0	0	0	FALSE	NA	NA	NA	NA	NA	0	0	0	0	0	1	NA	Inf	FALSE	NOT Hispanic or Latino	NEVER	45	Male	FALSE	FALSE	FALSE	FALSE	FALSE	M	1	non-black
1243	OUTPATIENT	*Unspecified	Final result	0.8	4510-01-20	4510-01-20	Yes	CREATININE	0.8	0.65	4510-01-07	0	NA	NA	Inf	2	4510-01-07	1	1	0	0	0	FALSE	NA	NA	NA	NA	NA	0	0	0	0	0	1	NA	Inf	FALSE	NOT Hispanic or Latino	NEVER	45	Male	FALSE	FALSE	FALSE	FALSE	FALSE	M	1	non-black
1244	OUTPATIENT	*Unspecified	Final result	0.9	4510-01-31	4510-01-31	Yes	CREATININE	0.9	0.65	4510-01-07	0	NA	NA	Inf	2	4510-01-07	1	1	0	0	0	FALSE	NA	NA	NA	NA	NA	0	0	0	0	0	1	NA	Inf	FALSE	NOT Hispanic or Latino	NEVER	45	Male	FALSE	FALSE	FALSE	FALSE	FALSE	M	1	non-black
1245	OUTPATIENT	*Unspecified	Final result	0.9	4510-05-16	4510-05-16	Yes	CREATININE	0.9	0.65	4510-01-07	0	NA	NA	Inf	2	4510-01-07	1	1	0	0	0	FALSE	NA	NA	NA	NA	NA	0	0	0	0	0	1	NA	Inf	FALSE	NOT Hispanic or Latino	NEVER	45	Male	FALSE	FALSE	FALSE	FALSE	FALSE	M	1	non-black
1246	OUTPATIENT	*Unspecified	Final result	0.88	4510-04-04	4510-04-04	Yes	CREATININE	0.88	0.65	4510-01-07	0	NA	NA	Inf	2	4510-01-07	1	1	0	0	0	FALSE	NA	NA	NA	NA	NA	0	0	0	0	0	1	NA	Inf	FALSE	NOT Hispanic or Latino	NEVER	45	Male	FALSE	FALSE	FALSE	FALSE	FALSE	M	1	non-black
1247	OUTPATIENT	*Unspecified	Final result	0.9	4510-01-26	4510-01-26	Yes	CREATININE	0.9	0.65	4510-01-07	0	NA	NA	Inf	2	4510-01-07	1	1	0	0	0	FALSE	NA	NA	NA	NA	NA	0	0	0	0	0	1	NA	Inf	FALSE	NOT Hispanic or Latino	NEVER	45	Male	FALSE	FALSE	FALSE	FALSE	FALSE	M	1	non-black
1248	OUTPATIENT	*Unspecified	Final result	0.8	4510-01-22	4510-01-22	Yes	CREATININE	0.8	0.65	4510-01-07	0	NA	NA	Inf	2	4510-01-07	1	1	0	0	0	FALSE	NA	NA	NA	NA	NA	0	0	0	0	0	1	NA	Inf	FALSE	NOT Hispanic or Latino	NEVER	45	Male	FALSE	FALSE	FALSE	FALSE	FALSE	M	1	non-black
1249	OUTPATIENT	*Unspecified	Final result	0.9	4510-02-04	4510-02-04	Yes	CREATININE	0.9	0.65	4510-01-07	0	NA	NA	Inf	2	4510-01-07	1	1	0	0	0	FALSE	NA	NA	NA	NA	NA	0	0	0	0	0	1	NA	Inf	FALSE	NOT Hispanic or Latino	NEVER	45	Male	FALSE	FALSE	FALSE	FALSE	FALSE	M	1	non-black
1250	OUTPATIENT	*Unspecified	Final result	0.8	4510-03-02	4510-03-02	Yes	CREATININE	0.8	0.65	4510-01-07	0	NA	NA	Inf	2	4510-01-07	1	1	0	0	0	FALSE	NA	NA	NA	NA	NA	0	0	0	0	0	1	NA	Inf	FALSE	NOT Hispanic or Latino	NEVER	45	Male	FALSE	FALSE	FALSE	FALSE	FALSE	M	1	non-black
1251	OUTPATIENT	*Unspecified	Final result	0.8	4510-03-01	4510-03-01	Yes	CREATININE	0.8	0.65	4510-01-07	0	NA	NA	Inf	2	4510-01-07	1	1	0	0	0	FALSE	NA	NA	NA	NA	NA	0	0	0	0	0	1	NA	Inf	FALSE	NOT Hispanic or Latino	NEVER	45	Male	FALSE	FALSE	FALSE	FALSE	FALSE	M	1	non-black
1252	OUTPATIENT	*Unspecified	Final result	0.8	4510-02-01	4510-02-01	Yes	CREATININE	0.8	0.65	4510-01-07	0	NA	NA	Inf	2	4510-01-07	1	1	0	0	0	FALSE	NA	NA	NA	NA	NA	0	0	0	0	0	1	NA	Inf	FALSE	NOT Hispanic or Latino	NEVER	45	Male	FALSE	FALSE	FALSE	FALSE	FALSE	M	1	non-black
1253	OUTPATIENT	*Unspecified	Final result	0.8	4510-02-26	4510-02-26	Yes	CREATININE	0.8	0.65	4510-01-07	0	NA	NA	Inf	2	4510-01-07	1	1	0	0	0	FALSE	NA	NA	NA	NA	NA	0	0	0	0	0	1	NA	Inf	FALSE	NOT Hispanic or Latino	NEVER	45	Male	FALSE	FALSE	FALSE	FALSE	FALSE	M	1	non-black
1254	OUTPATIENT	*Unspecified	Final result	0.9	4510-03-21	4510-03-21	Yes	CREATININE	0.9	0.65	4510-01-07	0	NA	NA	Inf	2	4510-01-07	1	1	0	0	0	FALSE	NA	NA	NA	NA	NA	0	0	0	0	0	1	NA	Inf	FALSE	NOT Hispanic or Latino	NEVER	45	Male	FALSE	FALSE	FALSE	FALSE	FALSE	M	1	non-black
1255	OUTPATIENT	*Unspecified	Final result	0.9	4510-03-25	4510-03-25	Yes	CREATININE	0.9	0.65	4510-01-07	0	NA	NA	Inf	2	4510-01-07	1	1	0	0	0	FALSE	NA	NA	NA	NA	NA	0	0	0	0	0	1	NA	Inf	FALSE	NOT Hispanic or Latino	NEVER	45	Male	FALSE	FALSE	FALSE	FALSE	FALSE	M	1	non-black
1256	OUTPATIENT	*Unspecified	Final result	0.77	4510-12-30	4510-12-31	Yes	CREATININE	0.77	0.65	4510-01-07	0	NA	NA	Inf	2	4510-01-07	1	1	0	0	0	FALSE	NA	NA	NA	NA	NA	0	0	0	0	0	1	NA	Inf	FALSE	NOT Hispanic or Latino	NEVER	45	Male	FALSE	FALSE	FALSE	FALSE	FALSE	M	1	non-black
1257	OUTPATIENT	Low	Final result	0.54	4510-01-21	4510-01-21	Yes	CREATININE	0.54	1.14814	4510-01-21	0	NA	NA	Inf	15	4510-01-21	14	1	1	1	1	FALSE	388	6	21	NA	0.54	0	0	0	0	0	1	NA	Inf	FALSE	Hispanic or Latino	NEVER	40	Male	FALSE	FALSE	FALSE	FALSE	TRUE	M	1	non-black
1258	OUTPATIENT	Low	Final result	0.5	4510-07-11	4510-07-11	Yes	CREATININE	0.5	1.14814	4510-01-21	0	NA	NA	Inf	15	4510-01-21	14	1	1	1	1	FALSE	388	6	21	NA	0.54	0	0	0	0	0	1	NA	Inf	FALSE	Hispanic or Latino	NEVER	40	Male	FALSE	FALSE	FALSE	FALSE	TRUE	M	1	non-black
1259	OUTPATIENT	*Unspecified	Final result	0.82	4511-02-08	4511-02-08	Yes	CREATININE	0.82	1.14814	4510-01-21	0	NA	NA	Inf	15	4510-01-21	14	1	1	1	1	FALSE	388	6	21	NA	0.54	0	0	0	0	0	1	NA	Inf	FALSE	Hispanic or Latino	NEVER	40	Male	FALSE	FALSE	FALSE	FALSE	TRUE	M	1	non-black
1260	OUTPATIENT	*Unspecified	Final result	0.89	4510-06-26	4510-06-26	Yes	CREATININE	0.89	1.1001	4510-01-22	0	NA	NA	Inf	17	4510-01-22	15	1	1	1	1	FALSE	296	12	1.5	NA	0.86	0	0	0	0	0.569477	1.02405	4510-01-07	Inf	FALSE	Hispanic or Latino	NEVER	51	Male	FALSE	FALSE	FALSE	FALSE	FALSE	M	1	non-black
1261	OUTPATIENT	*Unspecified	Final result	0.86	4510-01-22	4510-01-23	Yes	CREATININE	0.86	1.1001	4510-01-22	0	NA	NA	Inf	17	4510-01-22	15	1	1	1	1	FALSE	296	12	1.5	NA	0.86	0	0	0	0	0.569477	1.02405	4510-01-07	Inf	FALSE	Hispanic or Latino	NEVER	51	Male	FALSE	FALSE	FALSE	FALSE	FALSE	M	1	non-black
1262	OUTPATIENT	*Unspecified	Final result	0.85	4510-01-23	4510-01-24	Yes	CREATININE	0.85	1.1001	4510-01-22	0	NA	NA	Inf	17	4510-01-22	15	1	1	1	1	FALSE	296	12	1.5	NA	0.86	0	0	0	0	0.569477	1.02405	4510-01-07	Inf	FALSE	Hispanic or Latino	NEVER	51	Male	FALSE	FALSE	FALSE	FALSE	FALSE	M	1	non-black
1263	OUTPATIENT	*Unspecified	Final result	0.83	4510-10-08	4510-10-09	Yes	CREATININE	0.83	1.1001	4510-01-22	0	NA	NA	Inf	17	4510-01-22	15	1	1	1	1	FALSE	296	12	1.5	NA	0.86	0	0	0	0	0.569477	1.02405	4510-01-07	Inf	FALSE	Hispanic or Latino	NEVER	51	Male	FALSE	FALSE	FALSE	FALSE	FALSE	M	1	non-black
1264	OUTPATIENT	*Unspecified	Final result	0.86	4510-01-15	4510-01-15	Yes	CREATININE	0.86	1.14316	4510-01-15	0	NA	NA	Inf	10	4510-01-15	9	1	2	0	0	FALSE	450	8	2.7	NA	0.86	0	0	0	0	0	1	NA	Inf	FALSE	Hispanic or Latino	NEVER	41	Male	FALSE	FALSE	FALSE	FALSE	FALSE	M	1	non-black
1265	OUTPATIENT	*Unspecified	Final result	0.62	4510-01-14	4510-01-14	Yes	CREATININE	0.62	0.818444	4510-01-12	0	NA	NA	Inf	8	4510-01-12	5	1	1	1	1	FALSE	460	NA	1.1	NA	NA	0	0	0	0	5454.46	3.73755	4510-01-07	Inf	FALSE	NOT Hispanic or Latino	NEVER	63	Female	FALSE	FALSE	FALSE	FALSE	FALSE	F	0.742	non-black
1266	OUTPATIENT	*Unspecified	Final result	0.81	4510-01-19	4510-01-19	Yes	CREATININE	0.81	0.811774	4510-01-19	0	NA	NA	Inf	14	4510-01-19	13	1	1	0	0	FALSE	NA	16	NA	NA	0.81	0	0	0	0	0	1	NA	Inf	FALSE	NOT Hispanic or Latino	NEVER	66	Female	FALSE	FALSE	FALSE	FALSE	FALSE	F	0.742	non-black
1267	OUTPATIENT	*Unspecified	Final result	0.68	4510-04-23	4510-04-23	Yes	CREATININE	0.68	0.811774	4510-01-19	0	NA	NA	Inf	14	4510-01-19	13	1	1	0	0	FALSE	NA	16	NA	NA	0.81	0	0	0	0	0	1	NA	Inf	FALSE	NOT Hispanic or Latino	NEVER	66	Female	FALSE	FALSE	FALSE	FALSE	FALSE	F	0.742	non-black
1268	OUTPATIENT	High	Final result	1.31	4510-01-08	4510-01-08	Yes	CREATININE	1.31	1.04	4510-01-08	0	NA	NA	Inf	3	4510-01-08	1	1	1	1	0	FALSE	306	18	6	0.5	1.31	0	0	0	0	0	1	NA	Inf	FALSE	NOT Hispanic or Latino	NEVER	49	Male	FALSE	TRUE	FALSE	FALSE	FALSE	M	1	non-black
1269	OUTPATIENT	*Unspecified	Final result	1.03	4510-08-21	4510-08-21	Yes	CREATININE	1.03	1.04	4510-01-08	0	NA	NA	Inf	3	4510-01-08	1	1	1	1	0	FALSE	306	18	6	0.5	1.31	0	0	0	0	0	1	NA	Inf	FALSE	NOT Hispanic or Latino	NEVER	49	Male	FALSE	TRUE	FALSE	FALSE	FALSE	M	1	non-black
1270	OUTPATIENT	*Unspecified	Final result	1.1	4510-06-27	4510-06-27	Yes	CREATININE	1.1	1.04	4510-01-08	0	NA	NA	Inf	3	4510-01-08	1	1	1	1	0	FALSE	306	18	6	0.5	1.31	0	0	0	0	0	1	NA	Inf	FALSE	NOT Hispanic or Latino	NEVER	49	Male	FALSE	TRUE	FALSE	FALSE	FALSE	M	1	non-black
1271	OUTPATIENT	*Unspecified	Final result	0.92	4511-03-31	4511-03-31	Yes	CREATININE	0.92	1.04	4510-01-08	0	NA	NA	Inf	3	4510-01-08	1	1	1	1	0	FALSE	306	18	6	0.5	1.31	0	0	0	0	0	1	NA	Inf	FALSE	NOT Hispanic or Latino	NEVER	49	Male	FALSE	TRUE	FALSE	FALSE	FALSE	M	1	non-black
1272	OUTPATIENT	*Unspecified	Final result	0.97	4510-10-17	4510-10-17	Yes	CREATININE	0.97	1.04	4510-01-08	0	NA	NA	Inf	3	4510-01-08	1	1	1	1	0	FALSE	306	18	6	0.5	1.31	0	0	0	0	0	1	NA	Inf	FALSE	NOT Hispanic or Latino	NEVER	49	Male	FALSE	TRUE	FALSE	FALSE	FALSE	M	1	non-black
1273	OUTPATIENT	High	Final result	3.21	4510-01-31	4510-01-31	Yes	CREATININE	3.21	0.74	4510-01-31	3	4510-01-13	4510-02-02	22	27	4510-01-31	24	3	3	14	12	TRUE	218	117	1	NA	3.21	1	1	0	1	23002.7	4.36197	4510-01-07	-18	FALSE	Hispanic or Latino	YES	57	Male	FALSE	TRUE	FALSE	FALSE	TRUE	M	1	non-black
1274	OUTPATIENT	High	Final result	3.18	4510-02-02	4510-02-02	Yes	CREATININE	3.18	0.74	4510-01-31	3	4510-01-13	4510-02-02	22	27	4510-01-31	24	3	3	14	12	TRUE	218	117	1	NA	3.21	1	1	0	1	23002.7	4.36197	4510-01-07	-18	FALSE	Hispanic or Latino	YES	57	Male	FALSE	TRUE	FALSE	FALSE	TRUE	M	1	non-black
1275	OUTPATIENT	High	Final result	4.24	4510-02-01	4510-02-01	Yes	CREATININE	4.24	0.74	4510-01-31	3	4510-01-13	4510-02-02	22	27	4510-01-31	24	3	3	14	12	TRUE	218	117	1	NA	3.21	1	1	0	1	23002.7	4.36197	4510-01-07	-18	FALSE	Hispanic or Latino	YES	57	Male	FALSE	TRUE	FALSE	FALSE	TRUE	M	1	non-black
1276	OUTPATIENT	*Unspecified	Final result	0.83	4510-01-09	4510-01-09	Yes	CREATININE	0.83	1.13362	4510-01-09	0	NA	NA	Inf	2	4510-01-09	1	1	0	0	0	FALSE	237	12	0.9	NA	0.83	0	0	0	0	20666.4	4.31547	4510-01-08	Inf	FALSE	Hispanic or Latino	NEVER	43	Male	FALSE	FALSE	FALSE	FALSE	FALSE	M	1	non-black
1277	OUTPATIENT	*Unspecified	Final result	0.8	4511-01-09	4511-01-10	Yes	CREATININE	0.8	1.13362	4510-01-09	0	NA	NA	Inf	2	4510-01-09	1	1	0	0	0	FALSE	237	12	0.9	NA	0.83	0	0	0	0	20666.4	4.31547	4510-01-08	Inf	FALSE	Hispanic or Latino	NEVER	43	Male	FALSE	FALSE	FALSE	FALSE	FALSE	M	1	non-black
1278	OUTPATIENT	*Unspecified	Final result	0.75	4510-11-21	4510-11-21	Yes	CREATININE	0.75	1.13362	4510-01-09	0	NA	NA	Inf	2	4510-01-09	1	1	0	0	0	FALSE	237	12	0.9	NA	0.83	0	0	0	0	20666.4	4.31547	4510-01-08	Inf	FALSE	Hispanic or Latino	NEVER	43	Male	FALSE	FALSE	FALSE	FALSE	FALSE	M	1	non-black
1279	OUTPATIENT	Low	Final result	0.6	4510-03-02	4510-03-02	Yes	CREATININE	0.6	1.30222	4510-01-22	1	4510-01-08	4510-02-01	Inf	50	4510-01-22	14	3	3	8	8	TRUE	155	32	0.5	NA	1.62	1	0	0	0	0	1	NA	-14	FALSE	Hispanic or Latino	NEVER	50	Male	FALSE	TRUE	FALSE	FALSE	TRUE	M	1	non-black
1280	OUTPATIENT	Low	Final result	0.57	4510-03-20	4510-03-21	Yes	CREATININE	0.57	1.30222	4510-01-22	1	4510-01-08	4510-02-01	Inf	50	4510-01-22	14	3	3	8	8	TRUE	155	32	0.5	NA	1.62	1	0	0	0	0	1	NA	-14	FALSE	Hispanic or Latino	NEVER	50	Male	FALSE	TRUE	FALSE	FALSE	TRUE	M	1	non-black
1281	OUTPATIENT	Low	Final result	0.5	4510-03-03	4510-03-03	Yes	CREATININE	0.5	1.30222	4510-01-22	1	4510-01-08	4510-02-01	Inf	50	4510-01-22	14	3	3	8	8	TRUE	155	32	0.5	NA	1.62	1	0	0	0	0	1	NA	-14	FALSE	Hispanic or Latino	NEVER	50	Male	FALSE	TRUE	FALSE	FALSE	TRUE	M	1	non-black
1282	OUTPATIENT	Low	Final result	0.63	4510-03-11	4510-03-11	Yes	CREATININE	0.63	1.30222	4510-01-22	1	4510-01-08	4510-02-01	Inf	50	4510-01-22	14	3	3	8	8	TRUE	155	32	0.5	NA	1.62	1	0	0	0	0	1	NA	-14	FALSE	Hispanic or Latino	NEVER	50	Male	FALSE	TRUE	FALSE	FALSE	TRUE	M	1	non-black
1283	OUTPATIENT	Low	Final result	0.54	4510-02-27	4510-02-27	Yes	CREATININE	0.54	1.30222	4510-01-22	1	4510-01-08	4510-02-01	Inf	50	4510-01-22	14	3	3	8	8	TRUE	155	32	0.5	NA	1.62	1	0	0	0	0	1	NA	-14	FALSE	Hispanic or Latino	NEVER	50	Male	FALSE	TRUE	FALSE	FALSE	TRUE	M	1	non-black
1284	OUTPATIENT	*Unspecified	Final result	0.86	4510-01-27	4510-01-27	Yes	CREATININE	0.86	1.30222	4510-01-22	1	4510-01-08	4510-02-01	Inf	50	4510-01-22	14	3	3	8	8	TRUE	155	32	0.5	NA	1.62	1	0	0	0	0	1	NA	-14	FALSE	Hispanic or Latino	NEVER	50	Male	FALSE	TRUE	FALSE	FALSE	TRUE	M	1	non-black
1285	OUTPATIENT	Low	Final result	0.65	4510-02-12	4510-02-12	Yes	CREATININE	0.65	1.30222	4510-01-22	1	4510-01-08	4510-02-01	Inf	50	4510-01-22	14	3	3	8	8	TRUE	155	32	0.5	NA	1.62	1	0	0	0	0	1	NA	-14	FALSE	Hispanic or Latino	NEVER	50	Male	FALSE	TRUE	FALSE	FALSE	TRUE	M	1	non-black
1286	OUTPATIENT	*Unspecified	Final result	1.27	4510-01-25	4510-01-25	Yes	CREATININE	1.27	1.30222	4510-01-22	1	4510-01-08	4510-02-01	Inf	50	4510-01-22	14	3	3	8	8	TRUE	155	32	0.5	NA	1.62	1	0	0	0	0	1	NA	-14	FALSE	Hispanic or Latino	NEVER	50	Male	FALSE	TRUE	FALSE	FALSE	TRUE	M	1	non-black
1287	OUTPATIENT	*Unspecified	Final result	0.91	4510-01-29	4510-01-29	Yes	CREATININE	0.91	1.30222	4510-01-22	1	4510-01-08	4510-02-01	Inf	50	4510-01-22	14	3	3	8	8	TRUE	155	32	0.5	NA	1.62	1	0	0	0	0	1	NA	-14	FALSE	Hispanic or Latino	NEVER	50	Male	FALSE	TRUE	FALSE	FALSE	TRUE	M	1	non-black
1288	OUTPATIENT	*Unspecified	Final result	0.83	4510-01-31	4510-01-31	Yes	CREATININE	0.83	1.30222	4510-01-22	1	4510-01-08	4510-02-01	Inf	50	4510-01-22	14	3	3	8	8	TRUE	155	32	0.5	NA	1.62	1	0	0	0	0	1	NA	-14	FALSE	Hispanic or Latino	NEVER	50	Male	FALSE	TRUE	FALSE	FALSE	TRUE	M	1	non-black
1289	OUTPATIENT	Low	Final result	0.58	4510-02-24	4510-02-24	Yes	CREATININE	0.58	1.30222	4510-01-22	1	4510-01-08	4510-02-01	Inf	50	4510-01-22	14	3	3	8	8	TRUE	155	32	0.5	NA	1.62	1	0	0	0	0	1	NA	-14	FALSE	Hispanic or Latino	NEVER	50	Male	FALSE	TRUE	FALSE	FALSE	TRUE	M	1	non-black
1290	OUTPATIENT	High	Final result	1.62	4510-01-23	4510-01-23	Yes	CREATININE	1.62	1.30222	4510-01-22	1	4510-01-08	4510-02-01	Inf	50	4510-01-22	14	3	3	8	8	TRUE	155	32	0.5	NA	1.62	1	0	0	0	0	1	NA	-14	FALSE	Hispanic or Latino	NEVER	50	Male	FALSE	TRUE	FALSE	FALSE	TRUE	M	1	non-black
1291	OUTPATIENT	Low	Final result	0.57	4510-02-22	4510-02-22	Yes	CREATININE	0.57	1.30222	4510-01-22	1	4510-01-08	4510-02-01	Inf	50	4510-01-22	14	3	3	8	8	TRUE	155	32	0.5	NA	1.62	1	0	0	0	0	1	NA	-14	FALSE	Hispanic or Latino	NEVER	50	Male	FALSE	TRUE	FALSE	FALSE	TRUE	M	1	non-black
1292	OUTPATIENT	*Unspecified	Final result	0.81	4510-01-28	4510-01-28	Yes	CREATININE	0.81	1.30222	4510-01-22	1	4510-01-08	4510-02-01	Inf	50	4510-01-22	14	3	3	8	8	TRUE	155	32	0.5	NA	1.62	1	0	0	0	0	1	NA	-14	FALSE	Hispanic or Latino	NEVER	50	Male	FALSE	TRUE	FALSE	FALSE	TRUE	M	1	non-black
1293	OUTPATIENT	Low	Final result	0.58	4510-02-14	4510-02-14	Yes	CREATININE	0.58	1.30222	4510-01-22	1	4510-01-08	4510-02-01	Inf	50	4510-01-22	14	3	3	8	8	TRUE	155	32	0.5	NA	1.62	1	0	0	0	0	1	NA	-14	FALSE	Hispanic or Latino	NEVER	50	Male	FALSE	TRUE	FALSE	FALSE	TRUE	M	1	non-black
1294	OUTPATIENT	Low	Final result	0.67	4510-02-07	4510-02-07	Yes	CREATININE	0.67	1.30222	4510-01-22	1	4510-01-08	4510-02-01	Inf	50	4510-01-22	14	3	3	8	8	TRUE	155	32	0.5	NA	1.62	1	0	0	0	0	1	NA	-14	FALSE	Hispanic or Latino	NEVER	50	Male	FALSE	TRUE	FALSE	FALSE	TRUE	M	1	non-black
1295	OUTPATIENT	*Unspecified	Final result	0.82	4510-02-09	4510-02-09	Yes	CREATININE	0.82	1.30222	4510-01-22	1	4510-01-08	4510-02-01	Inf	50	4510-01-22	14	3	3	8	8	TRUE	155	32	0.5	NA	1.62	1	0	0	0	0	1	NA	-14	FALSE	Hispanic or Latino	NEVER	50	Male	FALSE	TRUE	FALSE	FALSE	TRUE	M	1	non-black
1296	OUTPATIENT	High	Final result	1.64	4510-01-23	4510-01-23	Yes	CREATININE	1.64	1.30222	4510-01-22	1	4510-01-08	4510-02-01	Inf	50	4510-01-22	14	3	3	8	8	TRUE	155	32	0.5	NA	1.62	1	0	0	0	0	1	NA	-14	FALSE	Hispanic or Latino	NEVER	50	Male	FALSE	TRUE	FALSE	FALSE	TRUE	M	1	non-black
1297	OUTPATIENT	Low	Final result	0.5	4510-02-18	4510-02-18	Yes	CREATININE	0.5	1.30222	4510-01-22	1	4510-01-08	4510-02-01	Inf	50	4510-01-22	14	3	3	8	8	TRUE	155	32	0.5	NA	1.62	1	0	0	0	0	1	NA	-14	FALSE	Hispanic or Latino	NEVER	50	Male	FALSE	TRUE	FALSE	FALSE	TRUE	M	1	non-black
1298	OUTPATIENT	Low	Final result	0.49	4510-02-16	4510-02-16	Yes	CREATININE	0.49	1.30222	4510-01-22	1	4510-01-08	4510-02-01	Inf	50	4510-01-22	14	3	3	8	8	TRUE	155	32	0.5	NA	1.62	1	0	0	0	0	1	NA	-14	FALSE	Hispanic or Latino	NEVER	50	Male	FALSE	TRUE	FALSE	FALSE	TRUE	M	1	non-black
1299	OUTPATIENT	*Unspecified	Final result	0.78	4510-02-03	4510-02-03	Yes	CREATININE	0.78	1.30222	4510-01-22	1	4510-01-08	4510-02-01	Inf	50	4510-01-22	14	3	3	8	8	TRUE	155	32	0.5	NA	1.62	1	0	0	0	0	1	NA	-14	FALSE	Hispanic or Latino	NEVER	50	Male	FALSE	TRUE	FALSE	FALSE	TRUE	M	1	non-black
1300	OUTPATIENT	*Unspecified	Final result	0.8	4510-02-01	4510-02-01	Yes	CREATININE	0.8	1.30222	4510-01-22	1	4510-01-08	4510-02-01	Inf	50	4510-01-22	14	3	3	8	8	TRUE	155	32	0.5	NA	1.62	1	0	0	0	0	1	NA	-14	FALSE	Hispanic or Latino	NEVER	50	Male	FALSE	TRUE	FALSE	FALSE	TRUE	M	1	non-black
1301	OUTPATIENT	Low	Final result	0.69	4510-02-11	4510-02-11	Yes	CREATININE	0.69	1.30222	4510-01-22	1	4510-01-08	4510-02-01	Inf	50	4510-01-22	14	3	3	8	8	TRUE	155	32	0.5	NA	1.62	1	0	0	0	0	1	NA	-14	FALSE	Hispanic or Latino	NEVER	50	Male	FALSE	TRUE	FALSE	FALSE	TRUE	M	1	non-black
1302	OUTPATIENT	Low	Final result	0.48	4510-02-15	4510-02-15	Yes	CREATININE	0.48	1.30222	4510-01-22	1	4510-01-08	4510-02-01	Inf	50	4510-01-22	14	3	3	8	8	TRUE	155	32	0.5	NA	1.62	1	0	0	0	0	1	NA	-14	FALSE	Hispanic or Latino	NEVER	50	Male	FALSE	TRUE	FALSE	FALSE	TRUE	M	1	non-black
1303	OUTPATIENT	High	Final result	1.65	4510-01-24	4510-01-24	Yes	CREATININE	1.65	1.30222	4510-01-22	1	4510-01-08	4510-02-01	Inf	50	4510-01-22	14	3	3	8	8	TRUE	155	32	0.5	NA	1.62	1	0	0	0	0	1	NA	-14	FALSE	Hispanic or Latino	NEVER	50	Male	FALSE	TRUE	FALSE	FALSE	TRUE	M	1	non-black
1304	OUTPATIENT	High	Final result	2.5	4510-01-24	4510-01-24	Yes	CREATININE	2.5	1.30222	4510-01-22	1	4510-01-08	4510-02-01	Inf	50	4510-01-22	14	3	3	8	8	TRUE	155	32	0.5	NA	1.62	1	0	0	0	0	1	NA	-14	FALSE	Hispanic or Latino	NEVER	50	Male	FALSE	TRUE	FALSE	FALSE	TRUE	M	1	non-black
1305	OUTPATIENT	Low	Final result	0.49	4510-02-19	4510-02-19	Yes	CREATININE	0.49	1.30222	4510-01-22	1	4510-01-08	4510-02-01	Inf	50	4510-01-22	14	3	3	8	8	TRUE	155	32	0.5	NA	1.62	1	0	0	0	0	1	NA	-14	FALSE	Hispanic or Latino	NEVER	50	Male	FALSE	TRUE	FALSE	FALSE	TRUE	M	1	non-black
1306	OUTPATIENT	High	Final result	1.65	4510-01-23	4510-01-23	Yes	CREATININE	1.65	1.30222	4510-01-22	1	4510-01-08	4510-02-01	Inf	50	4510-01-22	14	3	3	8	8	TRUE	155	32	0.5	NA	1.62	1	0	0	0	0	1	NA	-14	FALSE	Hispanic or Latino	NEVER	50	Male	FALSE	TRUE	FALSE	FALSE	TRUE	M	1	non-black
1307	OUTPATIENT	Low	Final result	0.53	4510-02-20	4510-02-20	Yes	CREATININE	0.53	1.30222	4510-01-22	1	4510-01-08	4510-02-01	Inf	50	4510-01-22	14	3	3	8	8	TRUE	155	32	0.5	NA	1.62	1	0	0	0	0	1	NA	-14	FALSE	Hispanic or Latino	NEVER	50	Male	FALSE	TRUE	FALSE	FALSE	TRUE	M	1	non-black
1308	OUTPATIENT	Low	Final result	0.59	4510-02-23	4510-02-23	Yes	CREATININE	0.59	1.30222	4510-01-22	1	4510-01-08	4510-02-01	Inf	50	4510-01-22	14	3	3	8	8	TRUE	155	32	0.5	NA	1.62	1	0	0	0	0	1	NA	-14	FALSE	Hispanic or Latino	NEVER	50	Male	FALSE	TRUE	FALSE	FALSE	TRUE	M	1	non-black
1309	OUTPATIENT	*Unspecified	Final result	0.71	4510-02-04	4510-02-04	Yes	CREATININE	0.71	1.30222	4510-01-22	1	4510-01-08	4510-02-01	Inf	50	4510-01-22	14	3	3	8	8	TRUE	155	32	0.5	NA	1.62	1	0	0	0	0	1	NA	-14	FALSE	Hispanic or Latino	NEVER	50	Male	FALSE	TRUE	FALSE	FALSE	TRUE	M	1	non-black
1310	OUTPATIENT	Low	Final result	0.22	4510-01-30	4510-01-30	Yes	CREATININE	0.22	1.30222	4510-01-22	1	4510-01-08	4510-02-01	Inf	50	4510-01-22	14	3	3	8	8	TRUE	155	32	0.5	NA	1.62	1	0	0	0	0	1	NA	-14	FALSE	Hispanic or Latino	NEVER	50	Male	FALSE	TRUE	FALSE	FALSE	TRUE	M	1	non-black
1311	OUTPATIENT	*Unspecified	Final result	1.21	4510-01-22	4510-01-22	Yes	CREATININE	1.21	1.30222	4510-01-22	1	4510-01-08	4510-02-01	Inf	50	4510-01-22	14	3	3	8	8	TRUE	155	32	0.5	NA	1.62	1	0	0	0	0	1	NA	-14	FALSE	Hispanic or Latino	NEVER	50	Male	FALSE	TRUE	FALSE	FALSE	TRUE	M	1	non-black
1312	OUTPATIENT	Low	Final result	0.59	4510-02-13	4510-02-13	Yes	CREATININE	0.59	1.30222	4510-01-22	1	4510-01-08	4510-02-01	Inf	50	4510-01-22	14	3	3	8	8	TRUE	155	32	0.5	NA	1.62	1	0	0	0	0	1	NA	-14	FALSE	Hispanic or Latino	NEVER	50	Male	FALSE	TRUE	FALSE	FALSE	TRUE	M	1	non-black
1313	OUTPATIENT	Low	Final result	0.52	4510-02-26	4510-02-26	Yes	CREATININE	0.52	1.30222	4510-01-22	1	4510-01-08	4510-02-01	Inf	50	4510-01-22	14	3	3	8	8	TRUE	155	32	0.5	NA	1.62	1	0	0	0	0	1	NA	-14	FALSE	Hispanic or Latino	NEVER	50	Male	FALSE	TRUE	FALSE	FALSE	TRUE	M	1	non-black
1314	OUTPATIENT	Low	Final result	0.49	4510-02-17	4510-02-17	Yes	CREATININE	0.49	1.30222	4510-01-22	1	4510-01-08	4510-02-01	Inf	50	4510-01-22	14	3	3	8	8	TRUE	155	32	0.5	NA	1.62	1	0	0	0	0	1	NA	-14	FALSE	Hispanic or Latino	NEVER	50	Male	FALSE	TRUE	FALSE	FALSE	TRUE	M	1	non-black
1315	OUTPATIENT	Low	Final result	0.48	4510-02-16	4510-02-16	Yes	CREATININE	0.48	1.30222	4510-01-22	1	4510-01-08	4510-02-01	Inf	50	4510-01-22	14	3	3	8	8	TRUE	155	32	0.5	NA	1.62	1	0	0	0	0	1	NA	-14	FALSE	Hispanic or Latino	NEVER	50	Male	FALSE	TRUE	FALSE	FALSE	TRUE	M	1	non-black
1316	OUTPATIENT	*Unspecified	Final result	1.23	4510-01-22	4510-01-22	Yes	CREATININE	1.23	1.30222	4510-01-22	1	4510-01-08	4510-02-01	Inf	50	4510-01-22	14	3	3	8	8	TRUE	155	32	0.5	NA	1.62	1	0	0	0	0	1	NA	-14	FALSE	Hispanic or Latino	NEVER	50	Male	FALSE	TRUE	FALSE	FALSE	TRUE	M	1	non-black
1317	OUTPATIENT	*Unspecified	Final result	0.86	4510-01-30	4510-01-30	Yes	CREATININE	0.86	1.30222	4510-01-22	1	4510-01-08	4510-02-01	Inf	50	4510-01-22	14	3	3	8	8	TRUE	155	32	0.5	NA	1.62	1	0	0	0	0	1	NA	-14	FALSE	Hispanic or Latino	NEVER	50	Male	FALSE	TRUE	FALSE	FALSE	TRUE	M	1	non-black
1318	OUTPATIENT	High	Final result	1.62	4510-01-23	4510-01-23	Yes	CREATININE	1.62	1.30222	4510-01-22	1	4510-01-08	4510-02-01	Inf	50	4510-01-22	14	3	3	8	8	TRUE	155	32	0.5	NA	1.62	1	0	0	0	0	1	NA	-14	FALSE	Hispanic or Latino	NEVER	50	Male	FALSE	TRUE	FALSE	FALSE	TRUE	M	1	non-black
1319	OUTPATIENT	Low	Final result	0.62	4510-02-08	4510-02-08	Yes	CREATININE	0.62	1.30222	4510-01-22	1	4510-01-08	4510-02-01	Inf	50	4510-01-22	14	3	3	8	8	TRUE	155	32	0.5	NA	1.62	1	0	0	0	0	1	NA	-14	FALSE	Hispanic or Latino	NEVER	50	Male	FALSE	TRUE	FALSE	FALSE	TRUE	M	1	non-black
1320	OUTPATIENT	Low	Final result	0.6	4510-02-21	4510-02-21	Yes	CREATININE	0.6	1.30222	4510-01-22	1	4510-01-08	4510-02-01	Inf	50	4510-01-22	14	3	3	8	8	TRUE	155	32	0.5	NA	1.62	1	0	0	0	0	1	NA	-14	FALSE	Hispanic or Latino	NEVER	50	Male	FALSE	TRUE	FALSE	FALSE	TRUE	M	1	non-black
1321	OUTPATIENT	*Unspecified	Final result	1.16	4510-01-26	4510-01-26	Yes	CREATININE	1.16	1.30222	4510-01-22	1	4510-01-08	4510-02-01	Inf	50	4510-01-22	14	3	3	8	8	TRUE	155	32	0.5	NA	1.62	1	0	0	0	0	1	NA	-14	FALSE	Hispanic or Latino	NEVER	50	Male	FALSE	TRUE	FALSE	FALSE	TRUE	M	1	non-black
1322	OUTPATIENT	*Unspecified	Final result	0.79	4510-02-02	4510-02-02	Yes	CREATININE	0.79	1.30222	4510-01-22	1	4510-01-08	4510-02-01	Inf	50	4510-01-22	14	3	3	8	8	TRUE	155	32	0.5	NA	1.62	1	0	0	0	0	1	NA	-14	FALSE	Hispanic or Latino	NEVER	50	Male	FALSE	TRUE	FALSE	FALSE	TRUE	M	1	non-black
1323	OUTPATIENT	*Unspecified	Final result	1.12	4510-01-26	4510-01-26	Yes	CREATININE	1.12	1.30222	4510-01-22	1	4510-01-08	4510-02-01	Inf	50	4510-01-22	14	3	3	8	8	TRUE	155	32	0.5	NA	1.62	1	0	0	0	0	1	NA	-14	FALSE	Hispanic or Latino	NEVER	50	Male	FALSE	TRUE	FALSE	FALSE	TRUE	M	1	non-black
1324	OUTPATIENT	High	Final result	1.58	4510-01-23	4510-01-23	Yes	CREATININE	1.58	1.30222	4510-01-22	1	4510-01-08	4510-02-01	Inf	50	4510-01-22	14	3	3	8	8	TRUE	155	32	0.5	NA	1.62	1	0	0	0	0	1	NA	-14	FALSE	Hispanic or Latino	NEVER	50	Male	FALSE	TRUE	FALSE	FALSE	TRUE	M	1	non-black
1325	OUTPATIENT	*Unspecified	Final result	1.23	4510-01-22	4510-01-22	Yes	CREATININE	1.23	1.30222	4510-01-22	1	4510-01-08	4510-02-01	Inf	50	4510-01-22	14	3	3	8	8	TRUE	155	32	0.5	NA	1.62	1	0	0	0	0	1	NA	-14	FALSE	Hispanic or Latino	NEVER	50	Male	FALSE	TRUE	FALSE	FALSE	TRUE	M	1	non-black
1326	OUTPATIENT	*Unspecified	Final result	1.04	4510-01-26	4510-01-26	Yes	CREATININE	1.04	1.30222	4510-01-22	1	4510-01-08	4510-02-01	Inf	50	4510-01-22	14	3	3	8	8	TRUE	155	32	0.5	NA	1.62	1	0	0	0	0	1	NA	-14	FALSE	Hispanic or Latino	NEVER	50	Male	FALSE	TRUE	FALSE	FALSE	TRUE	M	1	non-black
1327	OUTPATIENT	*Unspecified	Final result	1.23	4510-01-22	4510-01-22	Yes	CREATININE	1.23	1.30222	4510-01-22	1	4510-01-08	4510-02-01	Inf	50	4510-01-22	14	3	3	8	8	TRUE	155	32	0.5	NA	1.62	1	0	0	0	0	1	NA	-14	FALSE	Hispanic or Latino	NEVER	50	Male	FALSE	TRUE	FALSE	FALSE	TRUE	M	1	non-black
1328	OUTPATIENT	*Unspecified	Final result	0.97	4510-01-27	4510-01-27	Yes	CREATININE	0.97	1.30222	4510-01-22	1	4510-01-08	4510-02-01	Inf	50	4510-01-22	14	3	3	8	8	TRUE	155	32	0.5	NA	1.62	1	0	0	0	0	1	NA	-14	FALSE	Hispanic or Latino	NEVER	50	Male	FALSE	TRUE	FALSE	FALSE	TRUE	M	1	non-black
1329	OUTPATIENT	*Unspecified	Final result	0.82	4510-02-10	4510-02-10	Yes	CREATININE	0.82	1.30222	4510-01-22	1	4510-01-08	4510-02-01	Inf	50	4510-01-22	14	3	3	8	8	TRUE	155	32	0.5	NA	1.62	1	0	0	0	0	1	NA	-14	FALSE	Hispanic or Latino	NEVER	50	Male	FALSE	TRUE	FALSE	FALSE	TRUE	M	1	non-black
1330	OUTPATIENT	*Unspecified	Final result	1.3	4510-01-22	4510-01-22	Yes	CREATININE	1.3	1.30222	4510-01-22	1	4510-01-08	4510-02-01	Inf	50	4510-01-22	14	3	3	8	8	TRUE	155	32	0.5	NA	1.62	1	0	0	0	0	1	NA	-14	FALSE	Hispanic or Latino	NEVER	50	Male	FALSE	TRUE	FALSE	FALSE	TRUE	M	1	non-black
1331	OUTPATIENT	*Unspecified	Final result	0.75	4510-02-06	4510-02-06	Yes	CREATININE	0.75	1.30222	4510-01-22	1	4510-01-08	4510-02-01	Inf	50	4510-01-22	14	3	3	8	8	TRUE	155	32	0.5	NA	1.62	1	0	0	0	0	1	NA	-14	FALSE	Hispanic or Latino	NEVER	50	Male	FALSE	TRUE	FALSE	FALSE	TRUE	M	1	non-black
1332	OUTPATIENT	High	Final result	1.72	4510-01-25	4510-01-25	Yes	CREATININE	1.72	1.30222	4510-01-22	1	4510-01-08	4510-02-01	Inf	50	4510-01-22	14	3	3	8	8	TRUE	155	32	0.5	NA	1.62	1	0	0	0	0	1	NA	-14	FALSE	Hispanic or Latino	NEVER	50	Male	FALSE	TRUE	FALSE	FALSE	TRUE	M	1	non-black
1333	OUTPATIENT	Low	Final result	0.59	4510-02-25	4510-02-25	Yes	CREATININE	0.59	1.30222	4510-01-22	1	4510-01-08	4510-02-01	Inf	50	4510-01-22	14	3	3	8	8	TRUE	155	32	0.5	NA	1.62	1	0	0	0	0	1	NA	-14	FALSE	Hispanic or Latino	NEVER	50	Male	FALSE	TRUE	FALSE	FALSE	TRUE	M	1	non-black
1334	OUTPATIENT	Low	Final result	0.67	4510-02-09	4510-02-09	Yes	CREATININE	0.67	1.30222	4510-01-22	1	4510-01-08	4510-02-01	Inf	50	4510-01-22	14	3	3	8	8	TRUE	155	32	0.5	NA	1.62	1	0	0	0	0	1	NA	-14	FALSE	Hispanic or Latino	NEVER	50	Male	FALSE	TRUE	FALSE	FALSE	TRUE	M	1	non-black
1335	OUTPATIENT	*Unspecified	Final result	1.17	4510-07-30	4510-07-30	Yes	CREATININE	1.17	1.28894	4510-01-13	0	NA	NA	Inf	10	4510-01-13	5	1	1	0	0	FALSE	738	14	1.6	NA	1.01	0	0	0	0	0	1	NA	Inf	FALSE	NOT Hispanic or Latino	NEVER	53	Male	FALSE	FALSE	FALSE	FALSE	FALSE	M	1	non-black
1336	OUTPATIENT	*Unspecified	Final result	1.05	4510-06-28	4510-06-28	Yes	CREATININE	1.05	1.28894	4510-01-13	0	NA	NA	Inf	10	4510-01-13	5	1	1	0	0	FALSE	738	14	1.6	NA	1.01	0	0	0	0	0	1	NA	Inf	FALSE	NOT Hispanic or Latino	NEVER	53	Male	FALSE	FALSE	FALSE	FALSE	FALSE	M	1	non-black
1337	OUTPATIENT	*Unspecified	Final result	1.1	4510-01-14	4510-01-14	Yes	CREATININE	1.1	1.28894	4510-01-13	0	NA	NA	Inf	10	4510-01-13	5	1	1	0	0	FALSE	738	14	1.6	NA	1.01	0	0	0	0	0	1	NA	Inf	FALSE	NOT Hispanic or Latino	NEVER	53	Male	FALSE	FALSE	FALSE	FALSE	FALSE	M	1	non-black
1338	OUTPATIENT	*Unspecified	Final result	1.07	4510-01-15	4510-01-15	Yes	CREATININE	1.07	1.28894	4510-01-13	0	NA	NA	Inf	10	4510-01-13	5	1	1	0	0	FALSE	738	14	1.6	NA	1.01	0	0	0	0	0	1	NA	Inf	FALSE	NOT Hispanic or Latino	NEVER	53	Male	FALSE	FALSE	FALSE	FALSE	FALSE	M	1	non-black
1339	OUTPATIENT	*Unspecified	Final result	1.01	4510-01-13	4510-01-13	Yes	CREATININE	1.01	1.28894	4510-01-13	0	NA	NA	Inf	10	4510-01-13	5	1	1	0	0	FALSE	738	14	1.6	NA	1.01	0	0	0	0	0	1	NA	Inf	FALSE	NOT Hispanic or Latino	NEVER	53	Male	FALSE	FALSE	FALSE	FALSE	FALSE	M	1	non-black
1340	OUTPATIENT	*Unspecified	Final result	1.09	4510-03-07	4510-03-07	Yes	CREATININE	1.09	1.066	4510-01-30	0	NA	NA	Inf	36	4510-01-30	23	2	1	0	0	FALSE	264	17	1.3	NA	1	0	0	0	0	9226.65	3.96551	4510-01-07	Inf	FALSE	NOT Hispanic or Latino	QUIT	61	Male	FALSE	FALSE	FALSE	FALSE	FALSE	M	1	non-black
1341	OUTPATIENT	*Unspecified	Final result	0.97	4510-02-08	4510-02-08	Yes	CREATININE	0.97	1.066	4510-01-30	0	NA	NA	Inf	36	4510-01-30	23	2	1	0	0	FALSE	264	17	1.3	NA	1	0	0	0	0	9226.65	3.96551	4510-01-07	Inf	FALSE	NOT Hispanic or Latino	QUIT	61	Male	FALSE	FALSE	FALSE	FALSE	FALSE	M	1	non-black
1342	OUTPATIENT	*Unspecified	Final result	1.09	4510-02-03	4510-02-03	Yes	CREATININE	1.09	1.066	4510-01-30	0	NA	NA	Inf	36	4510-01-30	23	2	1	0	0	FALSE	264	17	1.3	NA	1	0	0	0	0	9226.65	3.96551	4510-01-07	Inf	FALSE	NOT Hispanic or Latino	QUIT	61	Male	FALSE	FALSE	FALSE	FALSE	FALSE	M	1	non-black
1343	OUTPATIENT	*Unspecified	Final result	1.06	4510-02-07	4510-02-07	Yes	CREATININE	1.06	1.066	4510-01-30	0	NA	NA	Inf	36	4510-01-30	23	2	1	0	0	FALSE	264	17	1.3	NA	1	0	0	0	0	9226.65	3.96551	4510-01-07	Inf	FALSE	NOT Hispanic or Latino	QUIT	61	Male	FALSE	FALSE	FALSE	FALSE	FALSE	M	1	non-black
1344	OUTPATIENT	*Unspecified	Final result	1.07	4510-02-11	4510-02-11	Yes	CREATININE	1.07	1.066	4510-01-30	0	NA	NA	Inf	36	4510-01-30	23	2	1	0	0	FALSE	264	17	1.3	NA	1	0	0	0	0	9226.65	3.96551	4510-01-07	Inf	FALSE	NOT Hispanic or Latino	QUIT	61	Male	FALSE	FALSE	FALSE	FALSE	FALSE	M	1	non-black
1345	OUTPATIENT	*Unspecified	Final result	1	4510-01-30	4510-01-30	Yes	CREATININE	1	1.066	4510-01-30	0	NA	NA	Inf	36	4510-01-30	23	2	1	0	0	FALSE	264	17	1.3	NA	1	0	0	0	0	9226.65	3.96551	4510-01-07	Inf	FALSE	NOT Hispanic or Latino	QUIT	61	Male	FALSE	FALSE	FALSE	FALSE	FALSE	M	1	non-black
1346	OUTPATIENT	*Unspecified	Final result	0.99	4510-02-02	4510-02-02	Yes	CREATININE	0.99	1.066	4510-01-30	0	NA	NA	Inf	36	4510-01-30	23	2	1	0	0	FALSE	264	17	1.3	NA	1	0	0	0	0	9226.65	3.96551	4510-01-07	Inf	FALSE	NOT Hispanic or Latino	QUIT	61	Male	FALSE	FALSE	FALSE	FALSE	FALSE	M	1	non-black
1347	OUTPATIENT	*Unspecified	Final result	1.08	4510-02-06	4510-02-06	Yes	CREATININE	1.08	1.066	4510-01-30	0	NA	NA	Inf	36	4510-01-30	23	2	1	0	0	FALSE	264	17	1.3	NA	1	0	0	0	0	9226.65	3.96551	4510-01-07	Inf	FALSE	NOT Hispanic or Latino	QUIT	61	Male	FALSE	FALSE	FALSE	FALSE	FALSE	M	1	non-black
1348	OUTPATIENT	*Unspecified	Final result	1.09	4510-02-10	4510-02-10	Yes	CREATININE	1.09	1.066	4510-01-30	0	NA	NA	Inf	36	4510-01-30	23	2	1	0	0	FALSE	264	17	1.3	NA	1	0	0	0	0	9226.65	3.96551	4510-01-07	Inf	FALSE	NOT Hispanic or Latino	QUIT	61	Male	FALSE	FALSE	FALSE	FALSE	FALSE	M	1	non-black
1349	OUTPATIENT	*Unspecified	Final result	1	4510-01-31	4510-01-31	Yes	CREATININE	1	1.066	4510-01-30	0	NA	NA	Inf	36	4510-01-30	23	2	1	0	0	FALSE	264	17	1.3	NA	1	0	0	0	0	9226.65	3.96551	4510-01-07	Inf	FALSE	NOT Hispanic or Latino	QUIT	61	Male	FALSE	FALSE	FALSE	FALSE	FALSE	M	1	non-black
1350	OUTPATIENT	*Unspecified	Final result	1.09	4510-02-04	4510-02-04	Yes	CREATININE	1.09	1.066	4510-01-30	0	NA	NA	Inf	36	4510-01-30	23	2	1	0	0	FALSE	264	17	1.3	NA	1	0	0	0	0	9226.65	3.96551	4510-01-07	Inf	FALSE	NOT Hispanic or Latino	QUIT	61	Male	FALSE	FALSE	FALSE	FALSE	FALSE	M	1	non-black
1351	OUTPATIENT	*Unspecified	Final result	1.09	4510-02-01	4510-02-01	Yes	CREATININE	1.09	1.066	4510-01-30	0	NA	NA	Inf	36	4510-01-30	23	2	1	0	0	FALSE	264	17	1.3	NA	1	0	0	0	0	9226.65	3.96551	4510-01-07	Inf	FALSE	NOT Hispanic or Latino	QUIT	61	Male	FALSE	FALSE	FALSE	FALSE	FALSE	M	1	non-black
1352	OUTPATIENT	*Unspecified	Final result	1.04	4510-02-05	4510-02-05	Yes	CREATININE	1.04	1.066	4510-01-30	0	NA	NA	Inf	36	4510-01-30	23	2	1	0	0	FALSE	264	17	1.3	NA	1	0	0	0	0	9226.65	3.96551	4510-01-07	Inf	FALSE	NOT Hispanic or Latino	QUIT	61	Male	FALSE	FALSE	FALSE	FALSE	FALSE	M	1	non-black
1353	OUTPATIENT	*Unspecified	Final result	1.04	4510-02-09	4510-02-09	Yes	CREATININE	1.04	1.066	4510-01-30	0	NA	NA	Inf	36	4510-01-30	23	2	1	0	0	FALSE	264	17	1.3	NA	1	0	0	0	0	9226.65	3.96551	4510-01-07	Inf	FALSE	NOT Hispanic or Latino	QUIT	61	Male	FALSE	FALSE	FALSE	FALSE	FALSE	M	1	non-black
1354	OUTPATIENT	Low	Final result	0.51	4510-01-25	4510-01-25	Yes	CREATININE	0.51	1.06295	4510-01-16	0	NA	NA	Inf	11	4510-01-16	8	1	1	1	1	FALSE	494	13	2.2	NA	0.51	0	0	0	0	6.1156e-05	1	4510-01-08	Inf	FALSE	NOT Hispanic or Latino	NEVER	62	Male	FALSE	TRUE	TRUE	FALSE	FALSE	M	1	non-black
1355	OUTPATIENT	Low	Final result	0.45	4510-01-26	4510-01-26	Yes	CREATININE	0.45	1.06295	4510-01-16	0	NA	NA	Inf	11	4510-01-16	8	1	1	1	1	FALSE	494	13	2.2	NA	0.51	0	0	0	0	6.1156e-05	1	4510-01-08	Inf	FALSE	NOT Hispanic or Latino	NEVER	62	Male	FALSE	TRUE	TRUE	FALSE	FALSE	M	1	non-black
1356	OUTPATIENT	Low	Final result	0.55	4510-01-25	4510-01-25	Yes	CREATININE	0.55	1.06295	4510-01-16	0	NA	NA	Inf	11	4510-01-16	8	1	1	1	1	FALSE	494	13	2.2	NA	0.51	0	0	0	0	6.1156e-05	1	4510-01-08	Inf	FALSE	NOT Hispanic or Latino	NEVER	62	Male	FALSE	TRUE	TRUE	FALSE	FALSE	M	1	non-black
1357	OUTPATIENT	Low	Final result	0.52	4510-01-17	4510-01-17	Yes	CREATININE	0.52	1.06295	4510-01-16	0	NA	NA	Inf	11	4510-01-16	8	1	1	1	1	FALSE	494	13	2.2	NA	0.51	0	0	0	0	6.1156e-05	1	4510-01-08	Inf	FALSE	NOT Hispanic or Latino	NEVER	62	Male	FALSE	TRUE	TRUE	FALSE	FALSE	M	1	non-black
1358	OUTPATIENT	Low	Final result	0.51	4510-01-16	4510-01-16	Yes	CREATININE	0.51	1.06295	4510-01-16	0	NA	NA	Inf	11	4510-01-16	8	1	1	1	1	FALSE	494	13	2.2	NA	0.51	0	0	0	0	6.1156e-05	1	4510-01-08	Inf	FALSE	NOT Hispanic or Latino	NEVER	62	Male	FALSE	TRUE	TRUE	FALSE	FALSE	M	1	non-black
1359	OUTPATIENT	Low	Final result	0.58	4510-01-09	4510-01-09	Yes	CREATININE	0.58	1.05703	4510-01-09	0	NA	NA	Inf	2	4510-01-09	1	1	1	0	0	FALSE	474	14	1.3	NA	0.58	0	0	0	0	5.21644e-13	1	4510-01-08	Inf	FALSE	NOT Hispanic or Latino	NEVER	64	Male	FALSE	TRUE	FALSE	FALSE	FALSE	M	1	non-black
1360	OUTPATIENT	Low	Final result	0.75	4511-05-02	4511-05-06	Yes	CREATININE	0.75	1.05703	4510-01-09	0	NA	NA	Inf	2	4510-01-09	1	1	1	0	0	FALSE	474	14	1.3	NA	0.58	0	0	0	0	5.21644e-13	1	4510-01-08	Inf	FALSE	NOT Hispanic or Latino	NEVER	64	Male	FALSE	TRUE	FALSE	FALSE	FALSE	M	1	non-black
1361	OUTPATIENT	Low	Final result	0.44	4510-02-19	4510-02-19	Yes	CREATININE	0.44	0.38	4510-01-10	1	4510-01-08	4510-01-08	Inf	86	4510-01-10	2	2	2	2	2	TRUE	214	14	0.6	NA	0.77	1	0	0	0	0	1	NA	-2	FALSE	NOT Hispanic or Latino	NEVER	62	Female	TRUE	TRUE	FALSE	TRUE	TRUE	F	0.742	non-black
1362	OUTPATIENT	Low	Final result	0.45	4510-02-02	4510-02-02	Yes	CREATININE	0.45	0.38	4510-01-10	1	4510-01-08	4510-01-08	Inf	86	4510-01-10	2	2	2	2	2	TRUE	214	14	0.6	NA	0.77	1	0	0	0	0	1	NA	-2	FALSE	NOT Hispanic or Latino	NEVER	62	Female	TRUE	TRUE	FALSE	TRUE	TRUE	F	0.742	non-black
1363	OUTPATIENT	Low	Final result	0.38	4510-02-06	4510-02-06	Yes	CREATININE	0.38	0.38	4510-01-10	1	4510-01-08	4510-01-08	Inf	86	4510-01-10	2	2	2	2	2	TRUE	214	14	0.6	NA	0.77	1	0	0	0	0	1	NA	-2	FALSE	NOT Hispanic or Latino	NEVER	62	Female	TRUE	TRUE	FALSE	TRUE	TRUE	F	0.742	non-black
1364	OUTPATIENT	*Unspecified	Final result	0.62	4510-01-19	4510-01-19	Yes	CREATININE	0.62	0.38	4510-01-10	1	4510-01-08	4510-01-08	Inf	86	4510-01-10	2	2	2	2	2	TRUE	214	14	0.6	NA	0.77	1	0	0	0	0	1	NA	-2	FALSE	NOT Hispanic or Latino	NEVER	62	Female	TRUE	TRUE	FALSE	TRUE	TRUE	F	0.742	non-black
1365	OUTPATIENT	Low	Final result	0.49	4510-02-17	4510-02-17	Yes	CREATININE	0.49	0.38	4510-01-10	1	4510-01-08	4510-01-08	Inf	86	4510-01-10	2	2	2	2	2	TRUE	214	14	0.6	NA	0.77	1	0	0	0	0	1	NA	-2	FALSE	NOT Hispanic or Latino	NEVER	62	Female	TRUE	TRUE	FALSE	TRUE	TRUE	F	0.742	non-black
1366	OUTPATIENT	Low	Final result	0.46	4510-02-10	4510-02-10	Yes	CREATININE	0.46	0.38	4510-01-10	1	4510-01-08	4510-01-08	Inf	86	4510-01-10	2	2	2	2	2	TRUE	214	14	0.6	NA	0.77	1	0	0	0	0	1	NA	-2	FALSE	NOT Hispanic or Latino	NEVER	62	Female	TRUE	TRUE	FALSE	TRUE	TRUE	F	0.742	non-black
1367	OUTPATIENT	*Unspecified	Final result	0.54	4510-04-01	4510-04-01	Yes	CREATININE	0.54	0.38	4510-01-10	1	4510-01-08	4510-01-08	Inf	86	4510-01-10	2	2	2	2	2	TRUE	214	14	0.6	NA	0.77	1	0	0	0	0	1	NA	-2	FALSE	NOT Hispanic or Latino	NEVER	62	Female	TRUE	TRUE	FALSE	TRUE	TRUE	F	0.742	non-black
1368	OUTPATIENT	Low	Final result	0.44	4510-01-24	4510-01-24	Yes	CREATININE	0.44	0.38	4510-01-10	1	4510-01-08	4510-01-08	Inf	86	4510-01-10	2	2	2	2	2	TRUE	214	14	0.6	NA	0.77	1	0	0	0	0	1	NA	-2	FALSE	NOT Hispanic or Latino	NEVER	62	Female	TRUE	TRUE	FALSE	TRUE	TRUE	F	0.742	non-black
1369	OUTPATIENT	*Unspecified	Final result	0.69	4510-01-14	4510-01-14	Yes	CREATININE	0.69	0.38	4510-01-10	1	4510-01-08	4510-01-08	Inf	86	4510-01-10	2	2	2	2	2	TRUE	214	14	0.6	NA	0.77	1	0	0	0	0	1	NA	-2	FALSE	NOT Hispanic or Latino	NEVER	62	Female	TRUE	TRUE	FALSE	TRUE	TRUE	F	0.742	non-black
1370	OUTPATIENT	Low	Final result	0.49	4510-02-25	4510-02-25	Yes	CREATININE	0.49	0.38	4510-01-10	1	4510-01-08	4510-01-08	Inf	86	4510-01-10	2	2	2	2	2	TRUE	214	14	0.6	NA	0.77	1	0	0	0	0	1	NA	-2	FALSE	NOT Hispanic or Latino	NEVER	62	Female	TRUE	TRUE	FALSE	TRUE	TRUE	F	0.742	non-black
1371	OUTPATIENT	Low	Final result	0.38	4510-03-01	4510-03-01	Yes	CREATININE	0.38	0.38	4510-01-10	1	4510-01-08	4510-01-08	Inf	86	4510-01-10	2	2	2	2	2	TRUE	214	14	0.6	NA	0.77	1	0	0	0	0	1	NA	-2	FALSE	NOT Hispanic or Latino	NEVER	62	Female	TRUE	TRUE	FALSE	TRUE	TRUE	F	0.742	non-black
1372	OUTPATIENT	*Unspecified	Final result	0.51	4510-01-21	4510-01-21	Yes	CREATININE	0.51	0.38	4510-01-10	1	4510-01-08	4510-01-08	Inf	86	4510-01-10	2	2	2	2	2	TRUE	214	14	0.6	NA	0.77	1	0	0	0	0	1	NA	-2	FALSE	NOT Hispanic or Latino	NEVER	62	Female	TRUE	TRUE	FALSE	TRUE	TRUE	F	0.742	non-black
1373	OUTPATIENT	*Unspecified	Final result	0.53	4510-01-21	4510-01-21	Yes	CREATININE	0.53	0.38	4510-01-10	1	4510-01-08	4510-01-08	Inf	86	4510-01-10	2	2	2	2	2	TRUE	214	14	0.6	NA	0.77	1	0	0	0	0	1	NA	-2	FALSE	NOT Hispanic or Latino	NEVER	62	Female	TRUE	TRUE	FALSE	TRUE	TRUE	F	0.742	non-black
1374	OUTPATIENT	Low	Final result	0.48	4510-03-24	4510-03-24	Yes	CREATININE	0.48	0.38	4510-01-10	1	4510-01-08	4510-01-08	Inf	86	4510-01-10	2	2	2	2	2	TRUE	214	14	0.6	NA	0.77	1	0	0	0	0	1	NA	-2	FALSE	NOT Hispanic or Latino	NEVER	62	Female	TRUE	TRUE	FALSE	TRUE	TRUE	F	0.742	non-black
1375	OUTPATIENT	Low	Final result	0.47	4510-03-09	4510-03-09	Yes	CREATININE	0.47	0.38	4510-01-10	1	4510-01-08	4510-01-08	Inf	86	4510-01-10	2	2	2	2	2	TRUE	214	14	0.6	NA	0.77	1	0	0	0	0	1	NA	-2	FALSE	NOT Hispanic or Latino	NEVER	62	Female	TRUE	TRUE	FALSE	TRUE	TRUE	F	0.742	non-black
1376	OUTPATIENT	Low	Final result	0.45	4510-02-09	4510-02-09	Yes	CREATININE	0.45	0.38	4510-01-10	1	4510-01-08	4510-01-08	Inf	86	4510-01-10	2	2	2	2	2	TRUE	214	14	0.6	NA	0.77	1	0	0	0	0	1	NA	-2	FALSE	NOT Hispanic or Latino	NEVER	62	Female	TRUE	TRUE	FALSE	TRUE	TRUE	F	0.742	non-black
1377	OUTPATIENT	Low	Final result	0.4	4510-02-03	4510-02-03	Yes	CREATININE	0.4	0.38	4510-01-10	1	4510-01-08	4510-01-08	Inf	86	4510-01-10	2	2	2	2	2	TRUE	214	14	0.6	NA	0.77	1	0	0	0	0	1	NA	-2	FALSE	NOT Hispanic or Latino	NEVER	62	Female	TRUE	TRUE	FALSE	TRUE	TRUE	F	0.742	non-black
1378	OUTPATIENT	*Unspecified	Final result	0.67	4510-01-13	4510-01-13	Yes	CREATININE	0.67	0.38	4510-01-10	1	4510-01-08	4510-01-08	Inf	86	4510-01-10	2	2	2	2	2	TRUE	214	14	0.6	NA	0.77	1	0	0	0	0	1	NA	-2	FALSE	NOT Hispanic or Latino	NEVER	62	Female	TRUE	TRUE	FALSE	TRUE	TRUE	F	0.742	non-black
1379	OUTPATIENT	Low	Final result	0.41	4510-02-07	4510-02-07	Yes	CREATININE	0.41	0.38	4510-01-10	1	4510-01-08	4510-01-08	Inf	86	4510-01-10	2	2	2	2	2	TRUE	214	14	0.6	NA	0.77	1	0	0	0	0	1	NA	-2	FALSE	NOT Hispanic or Latino	NEVER	62	Female	TRUE	TRUE	FALSE	TRUE	TRUE	F	0.742	non-black
1380	OUTPATIENT	*Unspecified	Final result	0.75	4510-01-11	4510-01-11	Yes	CREATININE	0.75	0.38	4510-01-10	1	4510-01-08	4510-01-08	Inf	86	4510-01-10	2	2	2	2	2	TRUE	214	14	0.6	NA	0.77	1	0	0	0	0	1	NA	-2	FALSE	NOT Hispanic or Latino	NEVER	62	Female	TRUE	TRUE	FALSE	TRUE	TRUE	F	0.742	non-black
1381	OUTPATIENT	*Unspecified	Final result	0.67	4510-01-16	4510-01-16	Yes	CREATININE	0.67	0.38	4510-01-10	1	4510-01-08	4510-01-08	Inf	86	4510-01-10	2	2	2	2	2	TRUE	214	14	0.6	NA	0.77	1	0	0	0	0	1	NA	-2	FALSE	NOT Hispanic or Latino	NEVER	62	Female	TRUE	TRUE	FALSE	TRUE	TRUE	F	0.742	non-black
1382	OUTPATIENT	Low	Final result	0.43	4510-01-31	4510-01-31	Yes	CREATININE	0.43	0.38	4510-01-10	1	4510-01-08	4510-01-08	Inf	86	4510-01-10	2	2	2	2	2	TRUE	214	14	0.6	NA	0.77	1	0	0	0	0	1	NA	-2	FALSE	NOT Hispanic or Latino	NEVER	62	Female	TRUE	TRUE	FALSE	TRUE	TRUE	F	0.742	non-black
1383	OUTPATIENT	*Unspecified	Final result	0.65	4510-01-12	4510-01-12	Yes	CREATININE	0.65	0.38	4510-01-10	1	4510-01-08	4510-01-08	Inf	86	4510-01-10	2	2	2	2	2	TRUE	214	14	0.6	NA	0.77	1	0	0	0	0	1	NA	-2	FALSE	NOT Hispanic or Latino	NEVER	62	Female	TRUE	TRUE	FALSE	TRUE	TRUE	F	0.742	non-black
1384	OUTPATIENT	Low	Final result	0.42	4510-01-30	4510-01-30	Yes	CREATININE	0.42	0.38	4510-01-10	1	4510-01-08	4510-01-08	Inf	86	4510-01-10	2	2	2	2	2	TRUE	214	14	0.6	NA	0.77	1	0	0	0	0	1	NA	-2	FALSE	NOT Hispanic or Latino	NEVER	62	Female	TRUE	TRUE	FALSE	TRUE	TRUE	F	0.742	non-black
1385	OUTPATIENT	Low	Final result	0.49	4510-03-18	4510-03-18	Yes	CREATININE	0.49	0.38	4510-01-10	1	4510-01-08	4510-01-08	Inf	86	4510-01-10	2	2	2	2	2	TRUE	214	14	0.6	NA	0.77	1	0	0	0	0	1	NA	-2	FALSE	NOT Hispanic or Latino	NEVER	62	Female	TRUE	TRUE	FALSE	TRUE	TRUE	F	0.742	non-black
1386	OUTPATIENT	Low	Final result	0.44	4510-03-07	4510-03-07	Yes	CREATININE	0.44	0.38	4510-01-10	1	4510-01-08	4510-01-08	Inf	86	4510-01-10	2	2	2	2	2	TRUE	214	14	0.6	NA	0.77	1	0	0	0	0	1	NA	-2	FALSE	NOT Hispanic or Latino	NEVER	62	Female	TRUE	TRUE	FALSE	TRUE	TRUE	F	0.742	non-black
1387	OUTPATIENT	Low	Final result	0.48	4510-02-21	4510-02-21	Yes	CREATININE	0.48	0.38	4510-01-10	1	4510-01-08	4510-01-08	Inf	86	4510-01-10	2	2	2	2	2	TRUE	214	14	0.6	NA	0.77	1	0	0	0	0	1	NA	-2	FALSE	NOT Hispanic or Latino	NEVER	62	Female	TRUE	TRUE	FALSE	TRUE	TRUE	F	0.742	non-black
1388	OUTPATIENT	Low	Final result	0.42	4510-03-03	4510-03-03	Yes	CREATININE	0.42	0.38	4510-01-10	1	4510-01-08	4510-01-08	Inf	86	4510-01-10	2	2	2	2	2	TRUE	214	14	0.6	NA	0.77	1	0	0	0	0	1	NA	-2	FALSE	NOT Hispanic or Latino	NEVER	62	Female	TRUE	TRUE	FALSE	TRUE	TRUE	F	0.742	non-black
1389	OUTPATIENT	*Unspecified	Final result	0.54	4510-01-23	4510-01-23	Yes	CREATININE	0.54	0.38	4510-01-10	1	4510-01-08	4510-01-08	Inf	86	4510-01-10	2	2	2	2	2	TRUE	214	14	0.6	NA	0.77	1	0	0	0	0	1	NA	-2	FALSE	NOT Hispanic or Latino	NEVER	62	Female	TRUE	TRUE	FALSE	TRUE	TRUE	F	0.742	non-black
1390	OUTPATIENT	Low	Final result	0.43	4510-02-23	4510-02-23	Yes	CREATININE	0.43	0.38	4510-01-10	1	4510-01-08	4510-01-08	Inf	86	4510-01-10	2	2	2	2	2	TRUE	214	14	0.6	NA	0.77	1	0	0	0	0	1	NA	-2	FALSE	NOT Hispanic or Latino	NEVER	62	Female	TRUE	TRUE	FALSE	TRUE	TRUE	F	0.742	non-black
1391	OUTPATIENT	Low	Final result	0.46	4510-01-29	4510-01-29	Yes	CREATININE	0.46	0.38	4510-01-10	1	4510-01-08	4510-01-08	Inf	86	4510-01-10	2	2	2	2	2	TRUE	214	14	0.6	NA	0.77	1	0	0	0	0	1	NA	-2	FALSE	NOT Hispanic or Latino	NEVER	62	Female	TRUE	TRUE	FALSE	TRUE	TRUE	F	0.742	non-black
1392	OUTPATIENT	Low	Final result	0.48	4510-01-25	4510-01-25	Yes	CREATININE	0.48	0.38	4510-01-10	1	4510-01-08	4510-01-08	Inf	86	4510-01-10	2	2	2	2	2	TRUE	214	14	0.6	NA	0.77	1	0	0	0	0	1	NA	-2	FALSE	NOT Hispanic or Latino	NEVER	62	Female	TRUE	TRUE	FALSE	TRUE	TRUE	F	0.742	non-black
1393	OUTPATIENT	*Unspecified	Final result	0.52	4510-01-22	4510-01-22	Yes	CREATININE	0.52	0.38	4510-01-10	1	4510-01-08	4510-01-08	Inf	86	4510-01-10	2	2	2	2	2	TRUE	214	14	0.6	NA	0.77	1	0	0	0	0	1	NA	-2	FALSE	NOT Hispanic or Latino	NEVER	62	Female	TRUE	TRUE	FALSE	TRUE	TRUE	F	0.742	non-black
1394	OUTPATIENT	Low	Final result	0.49	4510-02-01	4510-02-01	Yes	CREATININE	0.49	0.38	4510-01-10	1	4510-01-08	4510-01-08	Inf	86	4510-01-10	2	2	2	2	2	TRUE	214	14	0.6	NA	0.77	1	0	0	0	0	1	NA	-2	FALSE	NOT Hispanic or Latino	NEVER	62	Female	TRUE	TRUE	FALSE	TRUE	TRUE	F	0.742	non-black
1395	OUTPATIENT	Low	Final result	0.45	4510-01-28	4510-01-28	Yes	CREATININE	0.45	0.38	4510-01-10	1	4510-01-08	4510-01-08	Inf	86	4510-01-10	2	2	2	2	2	TRUE	214	14	0.6	NA	0.77	1	0	0	0	0	1	NA	-2	FALSE	NOT Hispanic or Latino	NEVER	62	Female	TRUE	TRUE	FALSE	TRUE	TRUE	F	0.742	non-black
1396	OUTPATIENT	*Unspecified	Final result	0.69	4510-01-17	4510-01-17	Yes	CREATININE	0.69	0.38	4510-01-10	1	4510-01-08	4510-01-08	Inf	86	4510-01-10	2	2	2	2	2	TRUE	214	14	0.6	NA	0.77	1	0	0	0	0	1	NA	-2	FALSE	NOT Hispanic or Latino	NEVER	62	Female	TRUE	TRUE	FALSE	TRUE	TRUE	F	0.742	non-black
1397	OUTPATIENT	*Unspecified	Final result	0.53	4510-01-23	4510-01-23	Yes	CREATININE	0.53	0.38	4510-01-10	1	4510-01-08	4510-01-08	Inf	86	4510-01-10	2	2	2	2	2	TRUE	214	14	0.6	NA	0.77	1	0	0	0	0	1	NA	-2	FALSE	NOT Hispanic or Latino	NEVER	62	Female	TRUE	TRUE	FALSE	TRUE	TRUE	F	0.742	non-black
1398	OUTPATIENT	*Unspecified	Final result	0.71	4510-01-15	4510-01-15	Yes	CREATININE	0.71	0.38	4510-01-10	1	4510-01-08	4510-01-08	Inf	86	4510-01-10	2	2	2	2	2	TRUE	214	14	0.6	NA	0.77	1	0	0	0	0	1	NA	-2	FALSE	NOT Hispanic or Latino	NEVER	62	Female	TRUE	TRUE	FALSE	TRUE	TRUE	F	0.742	non-black
1399	OUTPATIENT	Low	Final result	0.4	4510-02-05	4510-02-05	Yes	CREATININE	0.4	0.38	4510-01-10	1	4510-01-08	4510-01-08	Inf	86	4510-01-10	2	2	2	2	2	TRUE	214	14	0.6	NA	0.77	1	0	0	0	0	1	NA	-2	FALSE	NOT Hispanic or Latino	NEVER	62	Female	TRUE	TRUE	FALSE	TRUE	TRUE	F	0.742	non-black
1400	OUTPATIENT	Low	Final result	0.44	4510-01-22	4510-01-22	Yes	CREATININE	0.44	0.38	4510-01-10	1	4510-01-08	4510-01-08	Inf	86	4510-01-10	2	2	2	2	2	TRUE	214	14	0.6	NA	0.77	1	0	0	0	0	1	NA	-2	FALSE	NOT Hispanic or Latino	NEVER	62	Female	TRUE	TRUE	FALSE	TRUE	TRUE	F	0.742	non-black
1401	OUTPATIENT	Low	Final result	0.48	4510-02-20	4510-02-20	Yes	CREATININE	0.48	0.38	4510-01-10	1	4510-01-08	4510-01-08	Inf	86	4510-01-10	2	2	2	2	2	TRUE	214	14	0.6	NA	0.77	1	0	0	0	0	1	NA	-2	FALSE	NOT Hispanic or Latino	NEVER	62	Female	TRUE	TRUE	FALSE	TRUE	TRUE	F	0.742	non-black
1402	OUTPATIENT	*Unspecified	Final result	0.54	4510-01-20	4510-01-20	Yes	CREATININE	0.54	0.38	4510-01-10	1	4510-01-08	4510-01-08	Inf	86	4510-01-10	2	2	2	2	2	TRUE	214	14	0.6	NA	0.77	1	0	0	0	0	1	NA	-2	FALSE	NOT Hispanic or Latino	NEVER	62	Female	TRUE	TRUE	FALSE	TRUE	TRUE	F	0.742	non-black
1403	OUTPATIENT	*Unspecified	Final result	0.77	4510-01-10	4510-01-10	Yes	CREATININE	0.77	0.38	4510-01-10	1	4510-01-08	4510-01-08	Inf	86	4510-01-10	2	2	2	2	2	TRUE	214	14	0.6	NA	0.77	1	0	0	0	0	1	NA	-2	FALSE	NOT Hispanic or Latino	NEVER	62	Female	TRUE	TRUE	FALSE	TRUE	TRUE	F	0.742	non-black
1404	OUTPATIENT	Low	Final result	0.39	4510-02-27	4510-02-27	Yes	CREATININE	0.39	0.38	4510-01-10	1	4510-01-08	4510-01-08	Inf	86	4510-01-10	2	2	2	2	2	TRUE	214	14	0.6	NA	0.77	1	0	0	0	0	1	NA	-2	FALSE	NOT Hispanic or Latino	NEVER	62	Female	TRUE	TRUE	FALSE	TRUE	TRUE	F	0.742	non-black
1405	OUTPATIENT	Low	Final result	0.43	4510-01-26	4510-01-26	Yes	CREATININE	0.43	0.38	4510-01-10	1	4510-01-08	4510-01-08	Inf	86	4510-01-10	2	2	2	2	2	TRUE	214	14	0.6	NA	0.77	1	0	0	0	0	1	NA	-2	FALSE	NOT Hispanic or Latino	NEVER	62	Female	TRUE	TRUE	FALSE	TRUE	TRUE	F	0.742	non-black
1406	OUTPATIENT	Low	Final result	0.45	4510-02-11	4510-02-11	Yes	CREATININE	0.45	0.38	4510-01-10	1	4510-01-08	4510-01-08	Inf	86	4510-01-10	2	2	2	2	2	TRUE	214	14	0.6	NA	0.77	1	0	0	0	0	1	NA	-2	FALSE	NOT Hispanic or Latino	NEVER	62	Female	TRUE	TRUE	FALSE	TRUE	TRUE	F	0.742	non-black
1407	OUTPATIENT	Low	Final result	0.44	4510-01-27	4510-01-27	Yes	CREATININE	0.44	0.38	4510-01-10	1	4510-01-08	4510-01-08	Inf	86	4510-01-10	2	2	2	2	2	TRUE	214	14	0.6	NA	0.77	1	0	0	0	0	1	NA	-2	FALSE	NOT Hispanic or Latino	NEVER	62	Female	TRUE	TRUE	FALSE	TRUE	TRUE	F	0.742	non-black
1408	OUTPATIENT	*Unspecified	Final result	0.62	4510-01-18	4510-01-18	Yes	CREATININE	0.62	0.38	4510-01-10	1	4510-01-08	4510-01-08	Inf	86	4510-01-10	2	2	2	2	2	TRUE	214	14	0.6	NA	0.77	1	0	0	0	0	1	NA	-2	FALSE	NOT Hispanic or Latino	NEVER	62	Female	TRUE	TRUE	FALSE	TRUE	TRUE	F	0.742	non-black
1409	OUTPATIENT	Low	Final result	0.4	4510-02-27	4510-02-27	Yes	CREATININE	0.4	0.38	4510-01-10	1	4510-01-08	4510-01-08	Inf	86	4510-01-10	2	2	2	2	2	TRUE	214	14	0.6	NA	0.77	1	0	0	0	0	1	NA	-2	FALSE	NOT Hispanic or Latino	NEVER	62	Female	TRUE	TRUE	FALSE	TRUE	TRUE	F	0.742	non-black
1410	OUTPATIENT	Low	Final result	0.44	4510-03-08	4510-03-08	Yes	CREATININE	0.44	0.38	4510-01-10	1	4510-01-08	4510-01-08	Inf	86	4510-01-10	2	2	2	2	2	TRUE	214	14	0.6	NA	0.77	1	0	0	0	0	1	NA	-2	FALSE	NOT Hispanic or Latino	NEVER	62	Female	TRUE	TRUE	FALSE	TRUE	TRUE	F	0.742	non-black
1411	OUTPATIENT	Low	Final result	0.43	4510-03-05	4510-03-05	Yes	CREATININE	0.43	0.38	4510-01-10	1	4510-01-08	4510-01-08	Inf	86	4510-01-10	2	2	2	2	2	TRUE	214	14	0.6	NA	0.77	1	0	0	0	0	1	NA	-2	FALSE	NOT Hispanic or Latino	NEVER	62	Female	TRUE	TRUE	FALSE	TRUE	TRUE	F	0.742	non-black
1412	OUTPATIENT	*Unspecified	Final result	0.58	4510-01-25	4510-01-25	Yes	CREATININE	0.58	0.38	4510-01-10	1	4510-01-08	4510-01-08	Inf	86	4510-01-10	2	2	2	2	2	TRUE	214	14	0.6	NA	0.77	1	0	0	0	0	1	NA	-2	FALSE	NOT Hispanic or Latino	NEVER	62	Female	TRUE	TRUE	FALSE	TRUE	TRUE	F	0.742	non-black
1413	OUTPATIENT	Low	Final result	0.42	4510-02-04	4510-02-04	Yes	CREATININE	0.42	0.38	4510-01-10	1	4510-01-08	4510-01-08	Inf	86	4510-01-10	2	2	2	2	2	TRUE	214	14	0.6	NA	0.77	1	0	0	0	0	1	NA	-2	FALSE	NOT Hispanic or Latino	NEVER	62	Female	TRUE	TRUE	FALSE	TRUE	TRUE	F	0.742	non-black
1414	OUTPATIENT	Low	Final result	0.4	4510-02-12	4510-02-12	Yes	CREATININE	0.4	0.38	4510-01-10	1	4510-01-08	4510-01-08	Inf	86	4510-01-10	2	2	2	2	2	TRUE	214	14	0.6	NA	0.77	1	0	0	0	0	1	NA	-2	FALSE	NOT Hispanic or Latino	NEVER	62	Female	TRUE	TRUE	FALSE	TRUE	TRUE	F	0.742	non-black
1415	OUTPATIENT	*Unspecified	Final result	0.51	4510-01-21	4510-01-21	Yes	CREATININE	0.51	0.38	4510-01-10	1	4510-01-08	4510-01-08	Inf	86	4510-01-10	2	2	2	2	2	TRUE	214	14	0.6	NA	0.77	1	0	0	0	0	1	NA	-2	FALSE	NOT Hispanic or Latino	NEVER	62	Female	TRUE	TRUE	FALSE	TRUE	TRUE	F	0.742	non-black
1416	OUTPATIENT	*Unspecified	Final result	0.56	4510-02-22	4510-02-22	Yes	CREATININE	0.56	0.38	4510-01-10	1	4510-01-08	4510-01-08	Inf	86	4510-01-10	2	2	2	2	2	TRUE	214	14	0.6	NA	0.77	1	0	0	0	0	1	NA	-2	FALSE	NOT Hispanic or Latino	NEVER	62	Female	TRUE	TRUE	FALSE	TRUE	TRUE	F	0.742	non-black
1417	OUTPATIENT	Low	Final result	0.44	4510-02-08	4510-02-08	Yes	CREATININE	0.44	0.38	4510-01-10	1	4510-01-08	4510-01-08	Inf	86	4510-01-10	2	2	2	2	2	TRUE	214	14	0.6	NA	0.77	1	0	0	0	0	1	NA	-2	FALSE	NOT Hispanic or Latino	NEVER	62	Female	TRUE	TRUE	FALSE	TRUE	TRUE	F	0.742	non-black
1418	OUTPATIENT	*Unspecified	Final result	1	4511-07-16	4511-07-16	Yes	CREATININE	1	0.38	4510-01-10	1	4510-01-08	4510-01-08	Inf	86	4510-01-10	2	2	2	2	2	TRUE	214	14	0.6	NA	0.77	1	0	0	0	0	1	NA	-2	FALSE	NOT Hispanic or Latino	NEVER	62	Female	TRUE	TRUE	FALSE	TRUE	TRUE	F	0.742	non-black
1419	OUTPATIENT	*Unspecified	Final result	0.99	4511-05-22	4511-05-22	Yes	CREATININE	0.99	0.38	4510-01-10	1	4510-01-08	4510-01-08	Inf	86	4510-01-10	2	2	2	2	2	TRUE	214	14	0.6	NA	0.77	1	0	0	0	0	1	NA	-2	FALSE	NOT Hispanic or Latino	NEVER	62	Female	TRUE	TRUE	FALSE	TRUE	TRUE	F	0.742	non-black
1420	OUTPATIENT	*Unspecified	Final result	0.76	4510-08-23	4510-08-23	Yes	CREATININE	0.76	0.38	4510-01-10	1	4510-01-08	4510-01-08	Inf	86	4510-01-10	2	2	2	2	2	TRUE	214	14	0.6	NA	0.77	1	0	0	0	0	1	NA	-2	FALSE	NOT Hispanic or Latino	NEVER	62	Female	TRUE	TRUE	FALSE	TRUE	TRUE	F	0.742	non-black
1421	OUTPATIENT	*Unspecified	Final result	0.73	4510-12-29	4510-12-29	Yes	CREATININE	0.73	0.38	4510-01-10	1	4510-01-08	4510-01-08	Inf	86	4510-01-10	2	2	2	2	2	TRUE	214	14	0.6	NA	0.77	1	0	0	0	0	1	NA	-2	FALSE	NOT Hispanic or Latino	NEVER	62	Female	TRUE	TRUE	FALSE	TRUE	TRUE	F	0.742	non-black
1422	OUTPATIENT	*Unspecified	Final result	0.56	4510-05-05	4510-05-05	Yes	CREATININE	0.56	0.38	4510-01-10	1	4510-01-08	4510-01-08	Inf	86	4510-01-10	2	2	2	2	2	TRUE	214	14	0.6	NA	0.77	1	0	0	0	0	1	NA	-2	FALSE	NOT Hispanic or Latino	NEVER	62	Female	TRUE	TRUE	FALSE	TRUE	TRUE	F	0.742	non-black
1423	OUTPATIENT	*Unspecified	Final result	0.71	4511-04-29	4511-04-29	Yes	CREATININE	0.71	0.38	4510-01-10	1	4510-01-08	4510-01-08	Inf	86	4510-01-10	2	2	2	2	2	TRUE	214	14	0.6	NA	0.77	1	0	0	0	0	1	NA	-2	FALSE	NOT Hispanic or Latino	NEVER	62	Female	TRUE	TRUE	FALSE	TRUE	TRUE	F	0.742	non-black
1424	OUTPATIENT	*Unspecified	Final result	0.54	4511-04-30	4511-04-30	Yes	CREATININE	0.54	0.38	4510-01-10	1	4510-01-08	4510-01-08	Inf	86	4510-01-10	2	2	2	2	2	TRUE	214	14	0.6	NA	0.77	1	0	0	0	0	1	NA	-2	FALSE	NOT Hispanic or Latino	NEVER	62	Female	TRUE	TRUE	FALSE	TRUE	TRUE	F	0.742	non-black
1425	OUTPATIENT	*Unspecified	Final result	0.85	4511-04-26	4511-04-26	Yes	CREATININE	0.85	0.38	4510-01-10	1	4510-01-08	4510-01-08	Inf	86	4510-01-10	2	2	2	2	2	TRUE	214	14	0.6	NA	0.77	1	0	0	0	0	1	NA	-2	FALSE	NOT Hispanic or Latino	NEVER	62	Female	TRUE	TRUE	FALSE	TRUE	TRUE	F	0.742	non-black
1426	OUTPATIENT	*Unspecified	Final result	0.7	4511-04-28	4511-04-28	Yes	CREATININE	0.7	0.38	4510-01-10	1	4510-01-08	4510-01-08	Inf	86	4510-01-10	2	2	2	2	2	TRUE	214	14	0.6	NA	0.77	1	0	0	0	0	1	NA	-2	FALSE	NOT Hispanic or Latino	NEVER	62	Female	TRUE	TRUE	FALSE	TRUE	TRUE	F	0.742	non-black
1427	OUTPATIENT	*Unspecified	Final result	0.64	4511-04-25	4511-04-25	Yes	CREATININE	0.64	0.38	4510-01-10	1	4510-01-08	4510-01-08	Inf	86	4510-01-10	2	2	2	2	2	TRUE	214	14	0.6	NA	0.77	1	0	0	0	0	1	NA	-2	FALSE	NOT Hispanic or Latino	NEVER	62	Female	TRUE	TRUE	FALSE	TRUE	TRUE	F	0.742	non-black
1428	OUTPATIENT	*Unspecified	Final result	0.73	4511-04-27	4511-04-27	Yes	CREATININE	0.73	0.38	4510-01-10	1	4510-01-08	4510-01-08	Inf	86	4510-01-10	2	2	2	2	2	TRUE	214	14	0.6	NA	0.77	1	0	0	0	0	1	NA	-2	FALSE	NOT Hispanic or Latino	NEVER	62	Female	TRUE	TRUE	FALSE	TRUE	TRUE	F	0.742	non-black
1429	OUTPATIENT	*Unspecified	Final result	0.85	4511-04-25	4511-04-25	Yes	CREATININE	0.85	0.38	4510-01-10	1	4510-01-08	4510-01-08	Inf	86	4510-01-10	2	2	2	2	2	TRUE	214	14	0.6	NA	0.77	1	0	0	0	0	1	NA	-2	FALSE	NOT Hispanic or Latino	NEVER	62	Female	TRUE	TRUE	FALSE	TRUE	TRUE	F	0.742	non-black
1430	OUTPATIENT	*Unspecified	Final result	0.86	4511-04-25	4511-04-25	Yes	CREATININE	0.86	0.38	4510-01-10	1	4510-01-08	4510-01-08	Inf	86	4510-01-10	2	2	2	2	2	TRUE	214	14	0.6	NA	0.77	1	0	0	0	0	1	NA	-2	FALSE	NOT Hispanic or Latino	NEVER	62	Female	TRUE	TRUE	FALSE	TRUE	TRUE	F	0.742	non-black
[truncated: 2,734 more rows]
[truncated: 5 more columns]
